# Supplementary material for: Partner effect in accelerating pincer-co catalyzed nitrile hydroboration reactions
Source: Royal Society of Chemistry journal article supplement (doi:10.1039/d2cp03217a), 2022-12-16
Supplement: d2cp03217a1.pdf [file d2cp03217a1.pdf]

## Electronic Supplementary Information

For

# Partner Effect in Accelerating Pincer-Co Catalyzed Nitrile Hydroboration Reactions

Yumiao Ma<sup>\*a,b</sup> and Aqeel A. Hussein<sup>c\*</sup>

- a. BSJ Institute, Haidian, Beijing, 100084, People's Republic of China. Email: ymma@bsj-institute.top
- b. Hangzhou Yanqu Information Technology Co., Ltd. Xihu District, Hangzhou City, Zhejiang Province, 310003, People's Republic of China.
- c. Department of Medical Laboratory Science, College of Science, Komar University of Science and Technology, 46001 Sulaymaniyah, Kurdistan Region/Iraq; Email: aqeel.alaa@komar.edu.iq

### Table of Content

|                                                                                     |     |
|-------------------------------------------------------------------------------------|-----|
| Binding Configuration between Partner and Catalyst .....                            | S2  |
| Ion-pairing behavior of [K] in benzene .....                                        | S3  |
| Spin density isosurface of LCo .....                                                | S5  |
| The potential energy curve for the binding of LCo with Borate .....                 | S6  |
| The Gibbs free energy for the binding of explicit THF molecules to [K] in THF ..... | S6  |
| Absolute energies for the species involved in this work .....                       | S8  |
| Geometries for the involved species .....                                           | S10 |

## Binding Configuration between Partner and Catalyst

With  ${}^1\mathbf{6K}$  as an example, the binding configuration of  $[\mathbf{K}]$  and the cobalt complex is explored (Table S1). It is shown that the  $[\mathbf{K}]$  partner strongly favors binding with the centroid phenyl ring over the NHC part of the ligand. Meanwhile, in comparison to the K–O bounded structure  ${}^1\mathbf{6K}_3$ , the K–ligand bounded  ${}^1\mathbf{6K}_1$  is more stable by 2.9 kcal/mol.

**Table S11.** The geometries and relative Gibbs free energies (kcal/mol) for the representative binding configurations.

| ${}^1\mathbf{6K}_1$ (shown in Figure 4)                                             | ${}^1\mathbf{6K}_2$ ( $[\mathbf{K}]$ binds at the NHC side)                         | ${}^1\mathbf{6K}_3$ ( $[\mathbf{K}]$ does not bind the Pincer ligand)                |
|-------------------------------------------------------------------------------------|-------------------------------------------------------------------------------------|--------------------------------------------------------------------------------------|
| 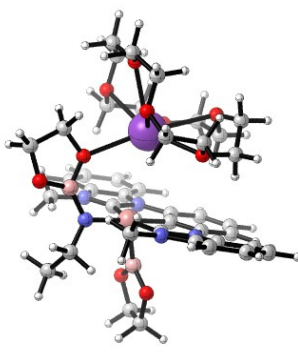  |   |   |
| 0.0                                                                                 | +8.4                                                                                | +2.9                                                                                 |
| ${}^1\mathbf{6W}_{\text{CO}_1}$ (shown in Figure 6)                                 | ${}^1\mathbf{6W}_{\text{CO}_2}$ (W binds at the NHC side)                           | ${}^1\mathbf{6W}_{\text{CO}_3}$ (W binds with Co)                                    |
|  |  |  |
| 0.0                                                                                 | +11.2                                                                               | +17.6                                                                                |

Similarly,  $\text{W}(\text{CO})_3$  also favors binding with the centroid phenyl ring, with a much larger preference of 11.2 kcal/mol, which should be attributed to the much stronger covalent nature of binding. On the other hand, the geometry with W–Co bonding is significantly higher in energy. Although the metal-metal bonding is difficult to be accurately handled by DFT calculations, the huge energy

difference prompts that the W–Co bonding is inaccessible. This is also in consistence with the well-known Effective Atomic Number (EAN) rule: W can only form 18e<sup>-</sup> configuration by binding the phenyl ring, rather than the Co atom.

### Ion-pairing behavior of [K] in benzene

Obviously, one major challenge for applying the [K] partner in benzene is to obtain discrete (18-crown-6)K<sup>+</sup> cation, rather than an ion-pair, which is much more common in a non-polar solvent like benzene. The Gibbs free energy for the dissociation of the ion pair for various weakly coordinating anions (WCAs) were examined.

**Table SI2.** The dissociation free energy for the ion pair formed by [K] and WCAs in benzene.

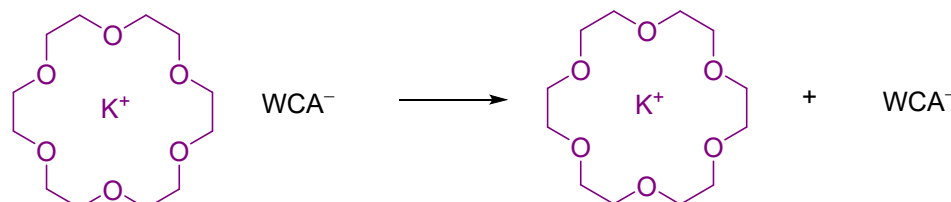

| WCA                                                                      | Dissociation free energy (kcal/mol) |
|--------------------------------------------------------------------------|-------------------------------------|
| BPh <sub>4</sub> <sup>-</sup>                                            | 20.9                                |
| B(C <sub>6</sub> F <sub>5</sub> ) <sub>4</sub> <sup>-</sup>              | 15.6                                |
| Al( <i>Or</i> -C <sub>4</sub> F <sub>9</sub> ) <sub>4</sub> <sup>-</sup> | 12.6                                |
| CHB <sub>11</sub> Cl <sub>11</sub> <sup>-</sup>                          | 18.1                                |

According to the above results, the dissociation of [K]–WCA ion pair is quite unfavorable in benzene, even with some of the weakest bases known yet as the counteranion. The unfavorable formation of discrete [K] might reduce the partner effect in benzene. Nevertheless, since the nature of the catalyst–[K] interaction is majorly contributed by dispersion rather than electrostatic factors, we propose that this binding does not require a dissociated cation, and an ion-pair is also able to play the role of an effective partner. This proposal is supported by the optimized binding geometry of the ion-pair with **1**.

**Table SI3.** The binding geometries and energetics of  $[\mathbf{K}]\text{-BPh}_4^-$  ion pair with **1**. The binding Gibbs free energy (kcal/mol) describes the free energy change from **1** to the binding state, in comparison with the value of discrete  $[\mathbf{K}]$  (-2.9 kcal/mol).

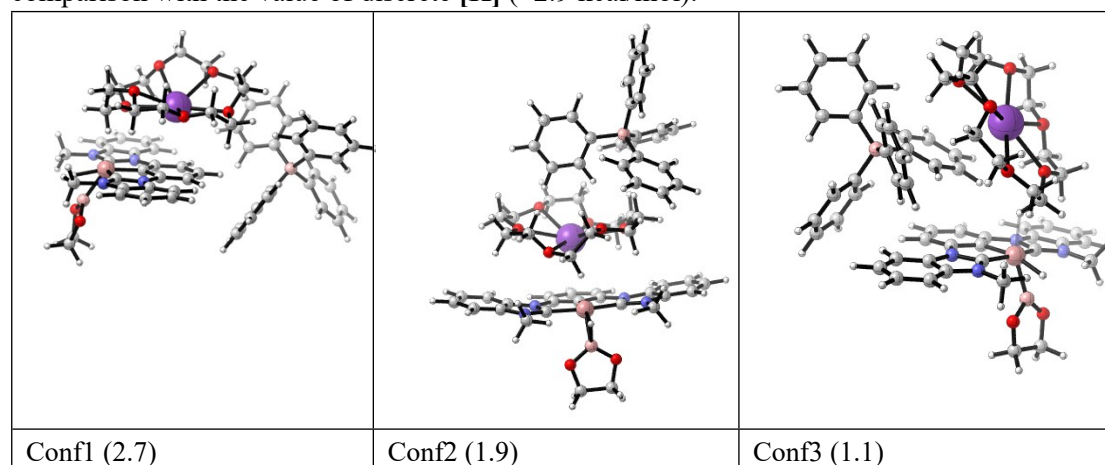

Among the three possible binding geometries, both Conf1 and Conf2 share a similar structure with  $^1\mathbf{IK}$  in Figure 4, with the potassium atom approaches the centroid Pincer phenyl ring at a K-C distance of 3.20 Å, and there is no close contact between  $[\mathbf{K}]$  and the counteranion. The distance between the counteranion and the catalytic center, described by the closest crown ether H-Pincer C distance, is as long as 6.19 Å. The three isomers are quite close in energy, and the non-covalent nature of the interaction enables rapid interchange of binding mode adapting to the requirement to stabilize the key transition states. Moreover, since  $\text{BPh}_4^-$  is the strongest coordinating anion examined in Table 2, the binding of the ion pair with the Pincer-Co fragment should be even stronger for other WCAs. These observations prompt us that WCAs might have a negligible effect on the partner effect of  $[\mathbf{K}]$ , although we are unable to fully explore the Gibbs energy profile in the presence of WCAs because of the large size of the system. Furthermore, in solvents with larger polar than benzene, the ion pairing will be reduced, and we believe that the partner effect of  $[\mathbf{K}]$  will be further released.

**Table SI4.** Geometry of selected intermediate and transition state in the presence of  $\text{BPh}_4^-$ , along with their relative Gibbs free energy

|                                                                                   |                                                                                    |
|-----------------------------------------------------------------------------------|------------------------------------------------------------------------------------|
| 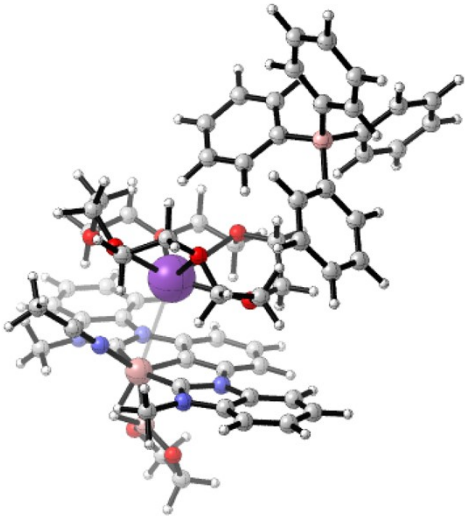 |  |
| <p><b>2K-BPh<sub>4</sub></b> (0.0)</p>                                            | <p><b>TS1K-BPh<sub>4</sub></b> (4.3)</p>                                           |

In order to further verify the influence of counteranion, the barrier of the first migration insertion process was taken as an example and checked in the presence of  $\text{BPh}_4^-$  in the revised version. It is found that the barrier is 4.3 kcal/mol from **2K-BPh<sub>4</sub>** to **TS1K-BPh<sub>4</sub>**, even slightly lower than the value of 5.8 kcal/mol without the counteranion. Therefore, it can be suggested that a properly selected WCA might be not harmful to the reaction.

### Spin density isosurface of LCo

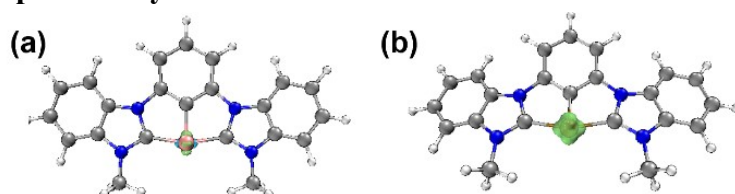

Figure S11. The spin density isosurface of 1LCo (a) and 3LCo (b), at an isovalue of 0.05.

### The potential energy curve for the binding of LCo with Borate

In order to verify whether a TS exists for the binding of LCo with borate, a potential energy scan of the Co–B distance in **11** was performed. The stability of the wave-function of each point

on the curve has been ensured. It is shown that the electronic energy keeps increasing monotonously along a wide range of Co–B distance, and no maximum point appears even though the distance is similar to the sum of the van de Waals radius of Co and B ( $\sim 4.0 \text{ \AA}$ ). As a result, we conclude that the binding process is either barrierless or very close to barrierless.

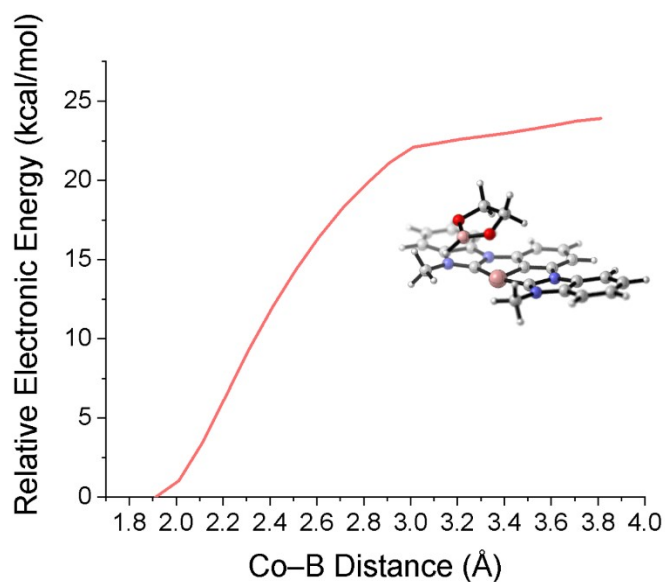

**Figure SI2.** The potential energy curve for the binding of LCo with Borate

### The Gibbs free energy for the binding of explicit THF molecules to [K] in THF

**Table SI5.** The Gibbs free energy for the binding of explicit THF molecules to [K] in THF

|                          |                          |
|--------------------------|--------------------------|
|                          |                          |
| [K]·1THF (+2.9 kcal/mol) | [K]·2THF (+8.5 kcal/mol) |

The binding of explicit THF molecules with **[K]** is examined. The structures were optimized under the implicit solvation of THF, and the Gibbs free energies at room temperature were obtained at the same level used in the text. The results show that the binding of one and two THF molecules to **[K]** is disfavored by 2.9 and 8.5 kcal/mol, respectively. As a result, the implicit solvation model is sufficient to describe the solvation effect of THF, and explicit THF binding to potassium will not reduce the binding of **[K]** to the catalyst.

## Absolute energies for the species involved in this work

**Table SI4.** Energetics for the species involved (in Hartree).

|                         | Thermal Correction | $E$            | $G$          |
|-------------------------|--------------------|----------------|--------------|
| <b>MeCN</b>             | 0.021478           | -132.64870136  | -132.627223  |
| <b>HBR<sub>2</sub></b>  | 0.051590           | -254.41586567  | -254.364276  |
| <b>PhH</b>              | 0.073836           | -232.06202795  | -231.988192  |
| <b><sup>3</sup>LCo</b>  | 0.295326           | -2449.34216770 | -2449.046842 |
| <b><sup>1</sup>LCo</b>  | 0.296987           | -2449.33936489 | -2449.042378 |
| <b><sup>1</sup>1</b>    | 0.373446           | -2703.79768804 | -2703.424242 |
| <b><sup>3</sup>1</b>    | 0.369622           | -2703.77848180 | -2703.408860 |
| <b><sup>1</sup>2</b>    | 0.411375           | -2836.47017077 | -2836.058796 |
| <b><sup>3</sup>2</b>    | 0.405163           | -2836.43991149 | -2836.034748 |
| <b>TS1</b>              | 0.411143           | -2836.44991047 | -2836.038767 |
| <b><sup>3</sup>TS1</b>  | 0.406102           | -2836.38809910 | -2835.981997 |
| <b><sup>1</sup>3</b>    | 0.413558           | -2836.47318196 | -2836.059624 |
| <b><sup>3</sup>3</b>    | 0.411700           | -2836.43307702 | -2836.021377 |
| <b><sup>1</sup>TS2</b>  | 0.417716           | -2836.46586162 | -2836.048146 |
| <b><sup>3</sup>TS2</b>  | 0.413586           | -2836.42703817 | -2836.013452 |
| <b><sup>3</sup>4</b>    | 0.414954           | -2836.49273468 | -2836.077781 |
| <b><sup>1</sup>4</b>    | 0.420309           | -2836.49944098 | -2836.079132 |
| <b><sup>1</sup>5</b>    | 0.490128           | -3090.93968553 | -3090.449558 |
| <b><sup>3</sup>5</b>    | 0.488942           | -3090.91044626 | -3090.421504 |
| <b><sup>1</sup>TS3</b>  | 0.492341           | -3090.92635955 | -3090.434019 |
| <b><sup>3</sup>TS3</b>  | 0.486980           | -3090.86875365 | -3090.381774 |
| <b><sup>1</sup>6</b>    | 0.496920           | -3090.94686710 | -3090.449947 |
| <b><sup>3</sup>6</b>    | 0.492524           | -3090.94781997 | -3090.455296 |
| <b>MECP</b>             | 0.494480           | -3090.9393634  | -3090.444883 |
| <b><sup>1</sup>TS4</b>  | 0.498455           | -3090.93297532 | -3090.434520 |
| <b><sup>3</sup>TS4</b>  | 0.495673           | -3090.89443106 | -3090.398758 |
| <b><sup>1</sup>7</b>    | 0.496113           | -3090.98155254 | -3090.485440 |
| <b><sup>3</sup>7</b>    | 0.494550           | -3090.97272481 | -3090.478175 |
| <b>[K]</b>              | 0.324451           | -1522.05703488 | -1521.732584 |
| <b>[K]PhH</b>           | 0.416013           | -1754.13265152 | -1753.716639 |
| <b><sup>1</sup>LCoK</b> | 0.646797           | -3971.42600890 | -3970.779212 |
| <b><sup>1</sup>1K</b>   | 0.722669           | -4225.88404393 | -4225.161375 |
| <b><sup>1</sup>2K</b>   | 0.762520           | -4358.55743070 | -4357.794911 |
| <b><sup>1</sup>TS1K</b> | 0.764295           | -4358.55008875 | -4357.785794 |
| <b><sup>1</sup>3K</b>   | 0.767010           | -4358.55747800 | -4357.790468 |
| <b><sup>1</sup>TS2K</b> | 0.765825           | -4358.55464655 | -4357.788822 |
| <b><sup>1</sup>4K</b>   | 0.771696           | -4358.59364195 | -4357.821946 |
| <b><sup>1</sup>5K</b>   | 0.847167           | -4613.03515005 | -4612.187983 |
| <b><sup>1</sup>TS3K</b> | 0.845069           | -4613.02450243 | -4612.179433 |



|                                          |          |                |              |
|------------------------------------------|----------|----------------|--------------|
| <b><sup>16</sup>K</b>                    | 0.850791 | -4613.04921518 | -4612.198424 |
| <b><sup>1</sup>TS4K</b>                  | 0.850851 | -4613.02802676 | -4612.177176 |
| <b><sup>17</sup>K</b>                    | 0.848993 | -4613.08171973 | -4612.232727 |
| <b><sup>1</sup>W(PMe)<sub>3</sub>PhH</b> | 0.393897 | -1681.93987746 | -1681.545980 |
| <b><sup>1</sup>LCoW(PMe)<sub>3</sub></b> | 0.617746 | -3899.21015461 | -3898.592409 |
| <b><sup>1</sup>1W<sub>PMe</sub></b>      | 0.696604 | -4153.67489558 | -4152.978292 |
| <b><sup>12</sup>W<sub>PMe</sub></b>      | 0.734595 | -4286.33691324 | -4285.602318 |
| <b><sup>1</sup>TS1W<sub>PMe</sub></b>    | 0.737053 | -4286.31874956 | -4285.581697 |
| <b><sup>13</sup>W<sub>PMe</sub></b>      | 0.738558 | -4286.34510548 | -4285.606547 |
| <b><sup>1</sup>TS2W<sub>PMe</sub></b>    | 0.738855 | -4286.33653815 | -4285.597683 |
| <b><sup>14</sup>W<sub>PMe</sub></b>      | 0.741593 | -4286.36669270 | -4285.625100 |
| <b><sup>15</sup>W<sub>PMe</sub></b>      | 0.816450 | -4540.80374005 | -4539.987290 |
| <b><sup>1</sup>TS3W<sub>PMe</sub></b>    | 0.818325 | -4540.79073632 | -4539.972411 |
| <b><sup>16</sup>W<sub>PMe</sub></b>      | 0.821233 | -4540.82777112 | -4540.006538 |
| <b><sup>1</sup>TS4W<sub>PMe</sub></b>    | 0.822017 | -4540.80655335 | -4539.984536 |
| <b><sup>17</sup>W<sub>PMe</sub></b>      | 0.818806 | -4540.84410510 | -4540.025299 |
| <b><sup>1</sup>W(CO)<sub>3</sub>PhH</b>  | 0.088674 | -639.04134355  | -638.952670  |
| <b><sup>1</sup>LCo</b>                   | 0.310717 | -2856.32805177 | -2856.017335 |
| <b><sup>1</sup>1W<sub>CO</sub></b>       | 0.386463 | -3110.78641381 | -3110.399951 |
| <b><sup>12</sup>W<sub>CO</sub></b>       | 0.428664 | -3243.46374206 | -3243.035078 |
| <b><sup>1</sup>TS1W<sub>CO</sub></b>     | 0.427662 | -3243.43235701 | -3243.004695 |
| <b><sup>13</sup>W<sub>CO</sub></b>       | 0.430341 | -3243.45762572 | -3243.027285 |
| <b><sup>1</sup>TS2W<sub>CO</sub></b>     | 0.431388 | -3243.45191801 | -3243.020530 |
| <b><sup>14</sup>W<sub>CO</sub></b>       | 0.434429 | -3243.48638759 | -3243.051959 |
| <b><sup>15</sup>W<sub>CO</sub></b>       | 0.508267 | -3497.92765265 | -3497.419386 |
| <b><sup>1</sup>TS3W<sub>CO</sub></b>     | 0.510514 | -3497.91671702 | -3497.406203 |
| <b><sup>16</sup>W<sub>CO</sub></b>       | 0.513330 | -3497.93898382 | -3497.425654 |
| <b><sup>1</sup>TS4W<sub>CO</sub></b>     | 0.515197 | -3497.91905592 | -3497.403859 |
| <b><sup>17</sup>W<sub>CO</sub></b>       | 0.513114 | -3497.97813114 | -3497.465017 |
| <b><sup>1</sup>LCoDipp</b>               | 0.713585 | -3303.92396357 | -3303.210379 |
| <b><sup>1</sup>1Dipp</b>                 | 0.841576 | -3636.95070898 | -3636.109133 |
| <b><sup>12</sup>Dipp</b>                 | 0.886477 | -3769.63564054 | -3768.749164 |
| <b><sup>1</sup>TS1Dipp</b>               | 0.886484 | -3769.61779316 | -3768.731309 |
| <b><sup>13</sup>Dipp</b>                 | 0.892284 | -3769.63819046 | -3768.745906 |
| <b><sup>1</sup>TS2Dipp</b>               | 0.891083 | -3769.62136105 | -3768.730278 |
| <b><sup>14</sup>Dipp</b>                 | 0.895530 | -3769.65625184 | -3768.760722 |
| <b><sup>15</sup>Dipp</b>                 | 1.019835 | -4102.67484454 | -4101.655010 |
| <b><sup>1</sup>TS3Dipp</b>               | 1.020173 | -4102.65712187 | -4101.636949 |
| <b><sup>16</sup>Dipp</b>                 | 1.025948 | -4102.67820889 | -4101.652261 |
| <b><sup>1</sup>TS4Dipp</b>               | 1.028832 | -4102.65311844 | -4101.624286 |
| <b><sup>7</sup>Dipp</b>                  | 1.027615 | -4102.69982948 | -4101.672214 |
| <b><sup>1</sup>LCoK<sub>Dipp</sub></b>   | 0.713585 | -4826.01327866 | -4825.299694 |
| <b><sup>1</sup>1K<sub>Dipp</sub></b>     | 1.200727 | -5159.03774094 | -5157.837014 |

|                                   |          |                |              |
|-----------------------------------|----------|----------------|--------------|
| <sup>12</sup> K <sub>Dipp</sub>   | 1.238644 | -5291.72483591 | -5290.486192 |
| <sup>1</sup> TS1K <sub>Dipp</sub> | 1.242966 | -5291.71984954 | -5290.476884 |
| <sup>13</sup> K <sub>Dipp</sub>   | 1.244400 | -5291.72074657 | -5290.476347 |
| <sup>1</sup> TS2K <sub>Dipp</sub> | 1.244005 | -5291.70643821 | -5290.462433 |
| <sup>14</sup> K <sub>Dipp</sub>   | 1.246650 | -5291.74510243 | -5290.498452 |
| <sup>15</sup> K <sub>Dipp</sub>   | 1.373156 | -5624.75306037 | -5623.379904 |
| <sup>1</sup> TS3K <sub>Dipp</sub> | 1.372960 | -5624.74259269 | -5623.369633 |
| <sup>16</sup> K <sub>Dipp</sub>   | 1.379833 | -5624.75774630 | -5623.377913 |
| <sup>1</sup> TS4K <sub>Dipp</sub> | 1.379500 | -5624.74418945 | -5623.364689 |
| <sup>17</sup> K <sub>Dipp</sub>   | 1.377609 | -5624.80370701 | -5623.426098 |
| [K]·1THF                          | 0.433281 | -1754.37106452 | -1753.937784 |
| [K]·2THF                          | 0.546129 | -1986.66478397 | -1986.118655 |
| TS1K-BPh <sub>4</sub>             | 1.104047 | -5309.41832980 | -5308.314283 |
| 2K-BPh <sub>4</sub>               | 1.103528 | -5309.41087982 | -5308.307352 |

## Geometries for the involved species

### <sup>1</sup>TS4<sub>KDipp</sub>

C 0.88481900 0.19233500 1.19585100  
 C 1.49798200 1.35414300 1.67570500  
 C 2.59383500 1.32821100 2.53795800  
 C 3.07750600 0.07627700 2.94172100  
 C 2.47337700 -1.11334700 2.51501900  
 C 1.38609700 -1.02991900 1.64058400  
 H 3.05292100 2.23888000 2.92544500  
 H 3.93554900 0.02420300 3.61730200  
 H 2.85044600 -2.06389300 2.88795100  
 C 0.71813800 -3.44873200 1.29263800  
 C -0.58296200 -1.71814100 0.50444100  
 C -0.41035900 -3.98575400 0.66559700  
 C 1.68665400 -4.28916300 1.84944700  
 C -0.62064900 -5.35965200 0.56444700  
 C 1.47859200 -5.66277000 1.75572400  
 H 2.58150800 -3.90399500 2.33363800  
 C 0.34275200 -6.19346100 1.12418200  
 H -1.51135600 -5.75872100 0.07571000  
 H 2.21795700 -6.34260300 2.18897500  
 H 0.20930500 -7.27766500 1.07472100  
 C 1.17141200 3.79832400 1.03762500  
 C -0.40419100 2.19422700 0.59154800  
 C 0.15698200 4.37194000 0.25585300  
 C 2.30728600 4.53048800 1.38739000

C 0.27307100 5.65700000 -0.26749200  
 C 2.40232500 5.83313100 0.90231000  
 H 3.10823700 4.10235000 1.98896000  
 C 1.41084500 6.38443400 0.07562800  
 H -0.49165300 6.06534200 -0.93126100  
 H 3.28000400 6.43340900 1.15908600  
 H 1.53303200 7.40106500 -0.30834700  
 N 0.79500600 2.47820300 1.20660000  
 N -0.80472900 3.38267600 0.05374400  
 N 0.58594400 -2.07988400 1.15718300  
 N -1.17106800 -2.91228700 0.20164200  
 Co -0.84213800 0.29164200 0.48509400  
 H -2.85462400 2.17067900 1.89626900  
 C -4.11827700 -0.80171500 -2.46425400  
 C -5.32521400 -0.10265800 -1.81092900  
 H -4.27905700 -1.89292400 -2.45971200  
 H -5.46859000 0.89252500 -2.28131600  
 B -3.53919500 -0.02947200 -0.39614100  
 O -3.02934400 -0.51393900 -1.59758500  
 O -4.92661600 0.09846100 -0.47385400  
 N -2.80190000 0.43510800 0.71098000  
 C -3.55556100 1.46982700 1.42263900  
 C -4.50333300 0.92713600 2.48433100  
 H -3.98163800 0.24948900 3.17976200  
 H -4.94448300 1.74987900 3.07737700  
 H -5.32451500 0.36056500 2.01826600

B -1.38997900 0.07666000 2.26619300  
 O -1.55525400 -1.12755700 2.93814800  
 O -1.31795700 1.12705100 3.16668600  
 C -1.34845900 -0.90064400 4.32520700  
 C -1.48387300 0.62648500 4.48466400  
 H -0.30643400 -1.19748900 4.56049600  
 H -2.50770100 0.87785600 4.82447400  
 H -4.15122900 2.05550500 0.70276000  
 C -3.86623600 -0.33918500 -3.88027600  
 H -3.01203900 -0.86536600 -4.33433700  
 H -4.75614800 -0.54432000 -4.50217800  
 H -3.67021100 0.74608800 -3.90428000  
 C -6.61914800 -0.87911000 -1.89225200  
 H -7.42771100 -0.33940300 -1.37025100  
 H -6.92454100 -1.01812200 -2.94462900  
 H -6.50648500 -1.87339900 -1.42753700  
 C -0.47598000 1.24786900 5.42260700  
 H -0.60303000 2.34336200 5.45650200  
 H -0.60479400 0.85615000 6.44730300  
 H 0.55233200 1.02633800 5.08639800  
 C -2.30089500 -1.71615900 5.16550600  
 H -2.14963000 -2.79374900 4.98719000  
 H -2.13157800 -1.51998800 6.23912300  
 H -3.34872700 -1.46560500 4.92581200  
 C -2.31054800 -3.25838200 -0.60097500  
 C -2.05650500 -3.66119800 -1.92487100  
 C -3.56654500 -3.42695600 0.00946400  
 C -3.10142600 -4.24697300 -2.64635400  
 C -4.57682100 -4.02296600 -0.75543400  
 C -4.34810300 -4.44182100 -2.06234600  
 H -2.93116600 -4.56717200 -3.67854700  
 H -5.56305500 -4.17480700 -0.31145100  
 H -5.15338600 -4.91369300 -2.63327200  
 C -1.94466700 3.60838600 -0.78194000  
 C -3.07680500 4.27583000 -0.27008400  
 C -1.83665600 3.22939100 -2.13334900  
 C -4.15419400 4.46058600 -1.14380800  
 C -2.94614600 3.42906600 -2.95864500  
 C -4.10195700 4.02381800 -2.46324100  
 H -5.05850600 4.95516500 -0.78095300  
 H -2.90169600 3.13136500 -4.00936200  
 H -4.96514300 4.17018000 -3.11951700  
 C -3.81661700 -3.04763500 1.45711500  
 C -3.47123300 -4.20660900 2.39700000  
 C -5.24921100 -2.58390300 1.70725300  
 H -3.14718200 -2.20895200 1.70341500  
 H -2.40176600 -4.46877500 2.36227600  
 H -3.71314700 -3.93199800 3.43851500  
 H -4.05428100 -5.11103800 2.14270400  
 H -5.54693200 -1.79536700 0.99727100  
 H -5.97411400 -3.41578000 1.64159800  
 H -5.32987400 -2.16843600 2.72611300  
 C -3.15124800 4.83127200 1.14428000  
 C -4.53502700 4.68607900 1.78178400  
 C -2.76020400 6.31367200 1.18654800  
 H -2.42804700 4.27171100 1.76005000  
 H -4.96058600 3.68031400 1.65058500  
 H -4.46809900 4.88898100 2.86474200  
 H -5.25075600 5.41517600 1.36232100  
 H -1.71827600 6.48914100 0.88155600  
 H -3.41677000 6.90950600 0.52689200  
 H -2.87346700 6.70253900 2.21422100  
 C -0.69387200 -3.50601200 -2.57446800  
 C -0.75546600 -2.51607100 -3.73578500  
 C -0.11233100 -4.84842700 -3.01772200  
 H -0.00974500 -3.08118700 -1.82209700  
 H -1.09879500 -1.53167500 -3.38225200  
 H 0.23878100 -2.39832400 -4.20197900  
 H -1.44953300 -2.86249400 -4.52208000  
 H -0.03458400 -5.55539400 -2.17443800  
 H -0.73131400 -5.32056100 -3.80106300  
 H 0.89966800 -4.71008500 -3.44035200  
 C -0.54027100 2.67108900 -2.69088000  
 C -0.15967800 3.32618500 -4.01766000  
 C -0.56669500 1.15134800 -2.82094000  
 H 0.25575500 2.91908800 -1.97048700  
 H -0.09638900 4.42471400 -3.92549200  
 H 0.82274800 2.95529600 -4.35976200  
 H -0.88421100 3.09440100 -4.81745300  
 H -0.94914000 0.66466000 -1.90794900  
 H -1.23422900 0.83545900 -3.63928000  
 H 0.44893100 0.77150700 -3.02317300  
 K 3.92752400 -0.15470200 -0.34894100  
 O 3.80748900 -2.92002300 -0.25418500  
 O 3.17114900 1.08680900 -2.71300500  
 O 5.81138800 -1.57371800 1.23586300  
 C 3.14420700 -3.45196200 -1.37550700  
 C 4.99444400 -3.57665500 0.11014400

|                                          |             |             |               |             |             |
|------------------------------------------|-------------|-------------|---------------|-------------|-------------|
| C 3.53835300                             | 2.43141300  | -2.88840400 | H -0.03702700 | -3.27522600 | 1.50196900  |
| C 3.18708400                             | 0.33875700  | -3.89999200 | H 0.72778500  | -3.58119000 | -0.07834500 |
| C 7.08856800                             | -1.25256300 | 0.74857300  | C 3.14767800  | -1.63259600 | 0.21255800  |
| C 5.52792400                             | -2.94246800 | 1.37473500  | H 3.64003500  | -0.64615400 | 0.17192400  |
| C 3.81308900                             | -3.06681600 | -2.68140200 | H 3.73953100  | -2.30564300 | 0.85987800  |
| H 2.11582000                             | -3.05524700 | -1.33666100 | H 3.13629000  | -2.04696900 | -0.80930300 |
| H 3.07236700                             | -4.55571600 | -1.30283800 | C 1.81565400  | -1.12187900 | 2.61177900  |
| H 4.79984500                             | -4.65164600 | 0.30331600  | H 0.88923900  | -1.05168400 | 3.20288200  |
| H 5.75225100                             | -3.51748000 | -0.69668500 | H 2.44210100  | -1.93275500 | 3.02728400  |
| C 3.42718600                             | 3.14209300  | -1.56039400 | H 2.36418300  | -0.17077200 | 2.71757400  |
| H 4.56765600                             | 2.49462500  | -3.29731100 | C -2.98296100 | -1.91916500 | 0.22242600  |
| H 2.86545900                             | 2.93145600  | -3.61288200 | H -2.37703000 | -2.84149100 | 0.22497700  |
| C 2.85503300                             | -1.09745700 | -3.59842200 | H -3.87683200 | -2.07133400 | 0.85489500  |
| H 4.18707900                             | 0.39104000  | -4.37637900 | H -3.31090300 | -1.73264500 | -0.81364600 |
| H 2.44351000                             | 0.73552700  | -4.62018600 | C -1.89867000 | -0.96862900 | 2.61211400  |
| C 7.31516900                             | 0.22359900  | 0.94072900  | H -2.91767000 | -1.09236400 | 3.02332500  |
| H 7.86960900                             | -1.80387100 | 1.30974100  | H -1.35581600 | -1.92050000 | 2.73885200  |
| H 7.19554200                             | -1.51327400 | -0.32460800 | H -1.37216400 | -0.19404600 | 3.19209700  |
| H 4.76615100                             | -3.01961700 | 2.16709200  | C -3.22046200 | 0.82027300  | 0.88642200  |
| H 6.42547800                             | -3.49814300 | 1.71012000  | H -3.46062000 | 1.14340000  | -0.14072100 |
| O 3.89748800                             | -1.67015500 | -2.84925200 | H -4.14769800 | 0.49119900  | 1.39179900  |
| H 4.84570800                             | -3.45398100 | -2.71628200 | H -2.81456400 | 1.69319700  | 1.42548300  |
| H 3.26670400                             | -3.53256800 | -3.52424500 | C -0.19373300 | 3.52913600  | 0.18728600  |
| O 4.27180000                             | 2.59899600  | -0.57510000 | H -1.29312500 | 3.43722800  | 0.16906500  |
| H 3.62518700                             | 4.22214200  | -1.69937100 | H 0.08954300  | 4.39204500  | 0.81759400  |
| H 2.39878700                             | 3.03844100  | -1.17938600 | H 0.14647900  | 3.71858500  | -0.84430000 |
| H 1.88920200                             | -1.15114300 | -3.05658200 | C 0.11388000  | 2.14612400  | 2.59745800  |
| H 2.73367000                             | -1.63379400 | -4.56061000 | H 0.49289000  | 3.10419000  | 2.99936900  |
| O 6.42754700                             | 0.94969400  | 0.13027400  | H -0.98149800 | 2.12345900  | 2.72606000  |
| H 7.15550700                             | 0.47466000  | 2.00857400  | H 0.54478600  | 1.31885400  | 3.18371500  |
| H 8.36565300                             | 0.46925600  | 0.68318600  | C 2.31627500  | 2.40929400  | 0.85553100  |
| C 5.60152200                             | 3.04413500  | -0.63150100 | H 2.48266400  | 3.40061300  | 1.31656000  |
| C 6.41331100                             | 2.32556500  | 0.41197100  | H 2.88157700  | 1.65407800  | 1.42789800  |
| H 6.04726600                             | 2.85458200  | -1.62792700 | H 2.71152400  | 2.41345200  | -0.17455700 |
| H 5.65240200                             | 4.13475300  | -0.43717600 | C -0.78312000 | 1.19182800  | -2.35546200 |
| H 7.44228100                             | 2.73820500  | 0.40038800  | C -1.41776400 | -0.07977500 | -2.32260100 |
| H 5.98518800                             | 2.50637900  | 1.41952400  | C 0.64731300  | 1.25337400  | -2.32577500 |
| <b><sup>1</sup>W(PMe)<sub>3</sub>PhH</b> |             |             | H -1.38030700 | 2.10608700  | -2.36723500 |
| W 0.00165200                             | -0.00489600 | -0.54677700 | C -0.64926800 | -1.28714300 | -2.35333900 |
| P -1.94054500                            | -0.51195000 | 0.81710600  | H -2.51033200 | -0.13238300 | -2.31991500 |
| P 0.52894000                             | 1.94275400  | 0.80398100  | C 1.43089500  | 0.06720000  | -2.35686500 |
| P 1.41566700                             | -1.41833400 | 0.82780400  | H 1.14909500  | 2.22532500  | -2.32633700 |
| C 0.90823800                             | -3.19292200 | 0.93846800  | C 0.76962600  | -1.20192900 | -2.31992200 |
| H 1.67201400                             | -3.81918000 | 1.43622400  | H -1.14412300 | -2.26094500 | -2.35778700 |

H 2.52136000 0.12584900 -2.36559000  
H 1.36006700 -2.12242400 -2.32081900  
**'TS3K**  
C 2.11181500 0.77434300 1.06327100  
C 2.98009200 -0.13874900 1.64548300  
C 3.25391700 -0.09924400 3.01272600  
C 2.63243400 0.89710600 3.77750200  
C 1.75790900 1.83641300 3.21568700  
C 1.50941500 1.75053800 1.84408400  
H 3.92795500 -0.80717900 3.49731400  
H 2.84419200 0.94794600 4.84951500  
H 1.30529800 2.60040800 3.85029500  
C -0.04392100 3.71101100 1.23514700  
C 0.63229600 2.15974500 -0.29334000  
C -0.55617800 4.05917700 -0.02927300  
C -0.33668500 4.48484700 2.35820500  
C -1.36851900 5.17379900 -0.21309600  
C -1.15579600 5.59939400 2.17563200  
H 0.05320600 4.24154800 3.34705300  
C -1.66513800 5.93986200 0.91415400  
H -1.76083600 5.43637700 -1.19836700  
H -1.40134500 6.22408400 3.03910700  
H -2.30055800 6.82397800 0.81155100  
C 4.44279300 -1.99606100 0.64393600  
C 2.99705400 -0.76505500 -0.61553100  
C 4.58257500 -2.36698700 -0.70641100  
C 5.20810400 -2.61313600 1.63299800  
C 5.48729900 -3.34281100 -1.11289400  
C 6.10989600 -3.59662800 1.22767000  
H 5.11389700 -2.34685000 2.68590200  
C 6.25113900 -3.95579000 -0.12056600  
H 5.59395400 -3.61840000 -2.16485700  
H 6.72278400 -4.09743300 1.98253300  
H 6.97198400 -4.72977900 -0.39860300  
N 3.47847300 -1.00446700 0.65166200  
N 3.69115500 -1.58830900 -1.43147800  
N 0.67263700 2.54497200 1.02915800  
N -0.11567300 3.09359500 -0.92074300  
C -0.33980900 3.17806800 -2.33907000  
H -1.41409800 3.07147000 -2.56575700  
H 0.01811400 4.15044700 -2.71532800  
H 0.23205300 2.38350400 -2.83355800  
C 3.67349300 -1.55252400 -2.87052400  
H 4.68381000 -1.31884800 -3.24528200

H 3.34710200 -2.52031800 -3.28693300  
H 2.98875300 -0.75828700 -3.19001900  
Co 1.63078000 0.58349200 -0.73243200  
H -0.57726400 0.47745900 -2.10437200  
C -0.54976900 -4.09152000 0.48181600  
C 0.36300300 -3.58523200 1.61155000  
H -1.51593700 -4.46937400 0.85533800  
H -0.07116400 -4.89076600 -0.11374200  
H -0.19902800 -3.41232300 2.54581700  
H 1.19647400 -4.27589500 1.82375800  
B 0.13349700 -1.96530600 0.05090300  
O -0.76407100 -2.96160900 -0.34354900  
O 0.86927200 -2.35338600 1.14522400  
N 0.11262200 -0.68614800 -0.52656700  
C 0.13566100 -0.31944900 -1.82875200  
C 0.27760700 -1.34526200 -2.92641100  
H -0.69343000 -1.85937600 -3.05338200  
H 0.54143600 -0.88410500 -3.89353100  
H 1.02812800 -2.10925100 -2.67296000  
B 2.98531600 1.77055900 -1.43484500  
O 2.81496400 3.12888500 -1.66534000  
O 4.27719800 1.39201500 -1.76572100  
C 4.06748400 3.70248000 -1.99660500  
C 4.96321400 2.50158800 -2.31763100  
H 3.95167700 4.39487700 -2.84761500  
H 4.44265300 4.28057600 -1.13203700  
H 5.08356500 2.35073700 -3.40705500  
H 5.96812300 2.58219500 -1.87069100  
H 1.53229300 0.64416200 -2.24793100  
K -2.74534900 -0.94622900 -0.18523100  
O -4.64269400 -2.72442100 -1.35487600  
O -3.55760500 -0.52918800 -2.81264900  
O -2.85448300 1.04469500 1.65125800  
O -1.98841900 -1.42828400 2.48357800  
O -3.65458700 1.64160400 -0.91283900  
O -3.91614700 -2.91339400 1.29235700  
C -4.48271700 -2.71586200 -2.74843500  
C -4.39852600 -3.97937900 -0.77646800  
C -4.63719300 -1.31012800 -3.26251900  
C -3.63719800 0.83565200 -3.14554200  
C -2.15755700 0.98598700 2.86876400  
C -3.44600300 2.28636300 1.37518700  
C -1.30320300 -0.26725900 2.89119600  
C -3.14315000 -1.75458900 3.20594400

C -4.38367400 1.64943600 -2.11171900  
C -4.36348500 2.15341800 0.18656300  
C -4.68727400 -3.92573300 0.70271300  
C -3.70032300 -3.05058400 2.67158100  
H -5.24460700 -3.36027200 -3.23321200  
H -3.34281900 -4.27509500 -0.94570000  
H -5.04557600 -4.75599700 -1.23398300  
H -5.60440700 -0.89915100 -2.91110500  
H -4.65859000 -1.33398700 -4.37069500  
H -4.11180600 0.97203700 -4.13641500  
H -2.59920400 1.20263800 -3.21634900  
H -2.87673900 1.00984500 3.71379600  
H -1.48733000 1.85900500 2.98874000  
H -2.66734400 3.04475600 1.17257000  
H -4.04874500 2.63835400 2.23716700  
H -0.46391900 -0.16211800 2.18708700  
H -0.88068000 -0.39316200 3.90866500  
H -2.92205000 -1.87460400 4.28676700  
H -3.91294700 -0.96531600 3.09865700  
H -5.39908700 1.23057200 -1.95235100  
H -4.51123600 2.68712800 -2.48540700  
H -5.21508500 1.48414300 0.43288200  
H -4.77899800 3.15557200 -0.04346400  
H -4.44187700 -4.91591700 1.13502600  
H -5.76546000 -3.73530000 0.87834500  
H -2.99765300 -3.88634600 2.86666200  
H -4.64731200 -3.27103500 3.20415400  
H -3.48222200 -3.10583500 -3.02911400

**13K**

C -0.03636800 1.10893200 -1.18849300  
C 1.17865500 1.12656900 -1.87641300  
C 1.23110800 1.11576000 -3.26882600  
C 0.01705200 1.08674000 -3.96870100  
C -1.22287800 1.05705800 -3.31449900  
C -1.22389400 1.06742900 -1.92080800  
H 2.17244600 1.14163200 -3.81969900  
H 0.03695600 1.08753000 -5.06236300  
H -2.14327200 1.04864600 -3.90076800  
C -3.66890300 0.88422200 -1.17382900  
C -1.97083200 1.28885300 0.30050300  
C -4.20131000 0.97652400 0.12529800  
C -4.49236400 0.59889600 -2.26300400  
C -5.56005300 0.80684700 0.37797000  
C -5.85286200 0.42611900 -2.01021100

H -4.09916300 0.50560800 -3.27549400  
C -6.38081800 0.53161500 -0.71463100  
H -5.96609100 0.88810900 1.38889300  
H -6.52365500 0.20498300 -2.84526900  
H -7.45475400 0.39576500 -0.55893300  
C 3.59939200 1.04927900 -1.02968300  
C 1.81897700 1.29959000 0.37520500  
C 4.06525200 1.06744700 0.29951700  
C 4.48629100 0.89090700 -2.09495700  
C 5.41830100 0.93668700 0.60318800  
C 5.83967000 0.75564500 -1.78938700  
H 4.14609100 0.87425800 -3.13072900  
C 6.30029300 0.77836700 -0.46438700  
H 5.77710700 0.96777300 1.63452300  
H 6.55906300 0.63621500 -2.60445100  
H 7.37106300 0.67968100 -0.26522500  
N 2.22661200 1.17462000 -0.93825400  
N 2.94934100 1.20526600 1.11413900  
N -2.30887800 1.08192600 -1.02430400  
N -3.13709700 1.22045500 0.97998800  
C -3.29561700 1.37132900 2.40296800  
H -3.78730800 0.47813700 2.82299200  
H -2.30154700 1.49275000 2.84798900  
H -3.90589300 2.26288700 2.62670600  
C 3.00534800 1.25389000 2.55425100  
H 2.03513600 0.92371300 2.94865000  
H 3.80436800 0.58431700 2.91096800  
H 3.20950100 2.27919400 2.90680600  
Co -0.07657800 1.45957400 0.65759100  
H -0.02570900 3.76573500 3.18964400  
C -0.82017000 5.17737500 -0.90481100  
C 0.69145200 5.06214000 -1.13265900  
H -1.37479200 5.42853400 -1.82411700  
H -1.07072300 5.92844600 -0.13322300  
H 0.93802700 4.91136400 -2.19991200  
H 1.25279400 5.93802700 -0.76722700  
B -0.07008000 3.18156300 -0.12508700  
O -1.20774000 3.89170900 -0.44623700  
O 1.07127900 3.90540700 -0.40445700  
N -0.07279400 1.85772300 2.39929600  
C -0.03110200 2.66413600 3.36211000  
C 0.02454300 2.27169400 4.81520700  
H 0.04543700 1.17557700 4.93698300  
H 0.92350700 2.69973500 5.29875100

H -0.84732900 2.67469500 5.36547300  
K -0.00674700 -1.79356800 0.15440900  
O 1.81432900 -2.24999500 -1.90459600  
O 1.02278800 -1.96374700 2.70354100  
O -1.03239600 -2.57985900 -2.26879400  
C 3.10126100 -2.63346100 -1.48305300  
C 1.27466500 -3.02280300 -2.94807400  
C 0.14134900 -2.04837700 3.79322100  
C 2.25008000 -2.60786400 2.90958400  
C -1.70501300 -3.80754300 -2.16931100  
C -0.08832300 -2.47733800 -3.30796900  
C 3.06198500 -3.76044000 -0.46830000  
H 3.56757300 -1.73430200 -1.04600700  
H 3.72542300 -2.93395800 -2.34788300  
H 1.92413900 -2.96097600 -3.84541400  
H 1.20852600 -4.09247500 -2.66191900  
C -1.11611700 -1.27672200 3.46070500  
H -0.07066600 -3.11185600 4.02874700  
H 0.59412600 -1.59730100 4.70080000  
C 3.02453600 -2.62960700 1.61852300  
H 2.08708200 -3.64917200 3.25368000  
H 2.84432800 -2.08132200 3.68448000  
C -2.80225900 -3.67654900 -1.14609100  
H -2.16063600 -4.08116300 -3.14234500  
H -1.01751400 -4.62673100 -1.87469400  
H 0.00539300 -1.40316200 -3.53254400  
H -0.45597700 -2.99139300 -4.21782100  
O 2.33478700 -3.42757000 0.68989900  
H 2.56439400 -4.64754500 -0.89485300  
H 4.09836900 -4.05575600 -0.20688400  
O -1.77278200 -1.72781900 2.30024100  
H -1.79985200 -1.30077800 4.33332700  
H -0.83552000 -0.23169300 3.24955200  
H 3.15701700 -1.59345000 1.24487400  
H 4.03210700 -3.04774200 1.81596200  
O -2.23758200 -3.42587500 0.11460900  
H -3.47978500 -2.84825700 -1.43655600  
H -3.39426300 -4.61457300 -1.12989100  
C -2.48056700 -2.93335200 2.42405500  
C -3.18874500 -3.21941700 1.12640100  
H -1.80427200 -3.77837300 2.66256900  
H -3.23411100 -2.86088800 3.23473300  
H -3.82274800 -4.12033700 1.25578400  
H -3.85205000 -2.37003800 0.86469200

<sup>1</sup>TSlW<sub>PMe</sub>  
C -0.56356200 0.38571600 -0.41793700  
C 0.58425600 0.99823800 -0.97335800  
C 1.31290900 0.41850500 -2.04969400  
C 0.91489700 -0.89831600 -2.45880700  
C -0.23060700 -1.56481400 -1.91590000  
C -0.94559000 -0.88207500 -0.88780600  
H 2.14601300 0.92003400 -2.53929700  
H 1.45827600 -1.38550800 -3.27307600  
H -0.53434600 -2.53358800 -2.30958300  
C -3.13908300 -2.19855700 -0.62576100  
C -2.78437000 -0.20298600 0.41268600  
C -4.30381200 -1.84087400 0.08140400  
C -3.10992000 -3.36486600 -1.39210700  
C -5.44606000 -2.63631600 0.07104700  
C -4.25686700 -4.15725100 -1.41016800  
H -2.22470500 -3.66017300 -1.95503900  
C -5.40570900 -3.80558100 -0.68703600  
H -6.33911600 -2.35537100 0.63440600  
H -4.25564000 -5.07711600 -2.00210300  
H -6.28465000 -4.45578400 -0.72046100  
C 1.52928100 3.36730200 -0.71301900  
C -0.39804600 2.71002800 0.30890500  
C 0.99996200 4.46083000 0.00061600  
C 2.71367100 3.49816000 -1.43892700  
C 1.63082900 5.70166100 0.01519200  
C 3.34349100 4.74230700 -1.42634500  
H 3.13999400 2.66374000 -1.99634100  
C 2.81415100 5.82702500 -0.71204700  
H 1.21864300 6.54380200 0.57609800  
H 4.27403700 4.87155800 -1.98656500  
H 3.33792800 6.78715600 -0.72383100  
N 0.65696000 2.32399200 -0.48464400  
N -0.16681800 4.01293300 0.60066200  
N -2.22270900 -1.19734900 -0.35683700  
N -4.03878500 -0.62704800 0.69323700  
C -5.02023500 0.13534100 1.41631300  
H -5.98996600 0.08126800 0.89516800  
H -5.14041800 -0.23754400 2.44873000  
H -4.68945700 1.18203200 1.43597000  
C -1.04629500 4.85254800 1.36834700  
H -0.66679000 4.99960200 2.39483600  
H -1.14805200 5.83319300 0.87544900  
H -2.03287600 4.37190400 1.40369800

Co -1.74912800 1.39039900 0.64444100  
H -2.86155000 2.31979700 1.19031300  
C -3.82283700 1.95465100 -2.91376700  
C -2.65732600 2.93443800 -3.08689800  
H -3.89532800 1.22414400 -3.73754800  
H -4.79627500 2.47496900 -2.83053600  
H -1.90870200 2.56071800 -3.81058100  
H -2.98105500 3.93739200 -3.41486400  
B -2.51483200 1.94195700 -1.03347200  
O -3.54354200 1.28512000 -1.70016700  
O -2.06699600 3.00956600 -1.80439100  
N -1.29581700 1.04029200 2.65819500  
C -2.20996900 1.82189300 2.63769400  
C -3.09455900 2.59230300 3.54370000  
H -2.82094900 2.38355200 4.59160800  
H -3.00305700 3.67501300 3.35534100  
H -4.15089700 2.31773100 3.38442400  
W 1.31054000 -1.05693800 -0.26063200  
P 0.68399400 -2.79022400 1.32743700  
P 3.26103100 -2.30496500 -0.93625400  
P 2.66052500 0.04339000 1.45789700  
C 1.87365000 -3.92698600 2.18478100  
C -0.43586000 -4.12161700 0.70338000  
C -0.31395500 -2.22685100 2.77254300  
C 2.90605800 -3.92341700 -1.76510500  
C 4.66445900 -2.86307600 0.14229800  
C 4.28594200 -1.50858500 -2.26013700  
C 3.39877000 -0.86592000 2.89461500  
C 1.90555100 1.42146200 2.42386700  
C 4.18959200 0.91295600 0.88179900  
H 1.35100900 -4.53803600 2.94381100  
H 2.32094900 -4.61162300 1.44384500  
H 2.68332000 -3.36977900 2.67629900  
H 0.01290200 -4.60192300 -0.18285700  
H -0.61898300 -4.89178500 1.47527800  
H -1.40390900 -3.69003000 0.41303800  
H -1.18271400 -1.65828900 2.40348600  
H -0.65734200 -3.07298600 3.39701400  
H 0.27612700 -1.53180300 3.39089400  
H 2.20934000 -3.76127600 -2.60580700  
H 3.82099700 -4.41435600 -2.14730200  
H 2.41169600 -4.60104700 -1.04786700  
H 4.29707900 -3.52069500 0.94549300  
H 5.42310200 -3.41288200 -0.44491200

H 5.15240900 -1.99128700 0.60834200  
H 4.70811400 -0.56536200 -1.87481500  
H 5.11162900 -2.16232200 -2.59682300  
H 3.65488600 -1.26271900 -3.12978600  
H 2.59167200 -1.24647100 3.54285000  
H 4.00032100 -1.71988200 2.54830200  
H 4.04195000 -0.19786300 3.49630700  
H 0.92371900 1.10132800 2.80940800  
H 2.56513500 1.73032200 3.25552300  
H 1.74202400 2.29112700 1.77003200  
H 4.67014700 1.47690900 1.70302100  
H 4.91784600 0.19141300 0.47601800  
H 3.92059200 1.61775400 0.07896700  
**<sup>17</sup>W<sub>PMe</sub>**  
C 0.00946900 0.07150400 -0.82404300  
C 0.75807600 -1.03778300 -1.31232400  
C 1.89663600 -0.84585300 -2.14041900  
C 2.30355000 0.49781700 -2.45073800  
C 1.63876500 1.61362500 -1.85729900  
C 0.44320400 1.38183700 -1.10365700  
H 2.42683900 -1.68460600 -2.59250700  
H 3.16272000 0.66873700 -3.10235500  
H 1.99332600 2.62016000 -2.08333100  
C -0.72093400 3.64310600 -0.85837100  
C -1.56926900 1.71183300 0.06445000  
C -1.95761200 3.94480900 -0.23948400  
C -0.01972900 4.63590600 -1.54366700  
C -2.49520600 5.22977200 -0.26002400  
C -0.56403300 5.92727700 -1.56794300  
H 0.91702500 4.42393500 -2.06007200  
C -1.77341900 6.22327100 -0.93346800  
H -3.44978400 5.45213100 0.22379000  
H -0.02620800 6.71813800 -2.09926900  
H -2.16811400 7.24308500 -0.96892100  
C 0.32610100 -3.55327300 -1.22469100  
C -1.15020300 -2.02273100 -0.35325200  
C -0.78437900 -4.25305800 -0.69641100  
C 1.38630000 -4.24445300 -1.81200400  
C -0.84940800 -5.64418500 -0.73130700  
C 1.31458200 -5.64245000 -1.85039800  
H 2.24626300 -3.72201100 -2.23093500  
C 0.22031800 -6.33068500 -1.31949600  
H -1.69981900 -6.18610600 -0.31032100  
H 2.13753700 -6.20375400 -2.30280800



|                                        |                                      |
|----------------------------------------|--------------------------------------|
| H 0.19747000 -7.42382300 -1.35907200   | C 2.23852800 3.65473100 1.06427600   |
| N 0.06244600 -2.22208900 -1.01070500   | H 1.39267500 3.35057400 1.70367300   |
| N -1.65675500 -3.30026800 -0.20840200  | H 2.76897200 4.49975500 1.54128900   |
| N -0.50683000 2.30185500 -0.62808200   | H 1.82049100 4.00201400 0.10745500   |
| N -2.43321300 2.76853300 0.29476000    | C 4.62657400 3.00937100 -0.29277300  |
| C -3.69735700 2.66111500 0.96046000    | H 4.21040500 3.13409700 -1.30659300  |
| H -3.81220300 1.62991900 1.31288100    | H 4.95105800 3.99486700 0.09158200   |
| H -3.75022300 3.34511700 1.82710400    | H 5.50624100 2.34983200 -0.37557800  |
| H -4.53364200 2.89916000 0.27684600    | C 4.25779200 2.30889200 2.40331500   |
| C -2.92444500 -3.60726700 0.38938400   | H 5.03286100 1.53035600 2.47221500   |
| H -3.65605200 -2.83184000 0.12213600   | H 4.73460600 3.29863000 2.52747400   |
| H -3.29396700 -4.56943600 0.00174100   | H 3.54496800 2.16488500 3.23299100   |
| H -2.85696900 -3.67883900 1.49145300   | C 5.34396800 -0.95342500 -1.78692700 |
| Co -1.64961300 -0.20722300 -0.00764000 | H 5.62178300 0.07634600 -2.06994500  |
| H -7.20588600 -1.22005700 -0.52681800  | H 6.25947900 -1.57094600 -1.73492200 |
| C -2.72976400 -0.71134700 2.81291600   | H 4.69178600 -1.35887900 -2.57854700 |
| C -3.91534500 -1.35480200 3.54323100   | C 5.89822800 -0.50284600 0.90310600  |
| H -1.81192800 -1.31574900 2.84376400   | H 6.23518600 0.52842700 0.70505200   |
| H -2.49588000 0.30023600 3.18491600    | H 5.62571900 -0.58000500 1.96807600  |
| H -3.75713600 -2.43275900 3.72403600   | H 6.74373400 -1.18795300 0.70679500  |
| H -4.13155000 -0.87015300 4.50882200   | C 4.39196900 -2.73946800 0.16995600  |
| B -4.54157700 -0.82518200 1.44263200   | H 3.68595900 -3.21881600 -0.52755800 |
| O -3.17385200 -0.60533800 1.46112000   | H 5.38507400 -3.21705800 0.07122400  |
| O -5.02176200 -1.19099100 2.66801100   | H 4.01161000 -2.91690900 1.19016900  |
| N -5.35557800 -0.67822200 0.29020700   | C 3.15633300 -0.91410300 3.34262600  |
| C -6.80527500 -0.84285900 0.42761100   | H 2.69850600 -1.15313900 4.32058400  |
| C -7.50442500 0.45137000 0.80500800    | H 3.78907900 -1.76624900 3.04291900  |
| H -7.33744500 1.22717100 0.03726400    | H 3.80306700 -0.03219500 3.45770200  |
| H -8.59351500 0.29277200 0.89745500    | C 0.99946600 -2.23459000 2.19498200  |
| H -7.13366200 0.83363400 1.77265000    | H 1.61449800 -3.02821300 1.73646400  |
| B -4.83258400 -0.26617300 -0.96846600  | H 0.80003500 -2.49863100 3.25040800  |
| O -3.48675500 -0.14762500 -1.22876400  | H 0.04654500 -2.17390500 1.64298200  |
| O -5.60645700 0.04328400 -2.05110200   | C 0.71164100 0.45428800 3.02728700   |
| C -3.34557300 0.45071800 -2.51507700   | H 0.37601400 -0.02402600 3.96696600  |
| C -4.72798900 0.26489800 -3.14988500   | H 1.21175800 1.40710000 3.27173900   |
| H -3.07854000 1.51276300 -2.38051400   | H -0.15324400 0.67753600 2.37686200  |
| H -2.53280900 -0.04974800 -3.06151600  | <sup>15</sup> Dipp                   |
| H -5.05960100 1.14932100 -3.71659500   | C 0.03555400 1.51459700 -1.35385200  |
| H -4.76296800 -0.61382400 -3.81823200  | C -1.15435400 2.03357900 -1.86681000 |
| H -6.99978100 -1.61219600 1.19182500   | C -1.15958800 2.98389700 -2.88831300 |
| W 2.33094800 0.23697600 -0.18125200    | C 0.07468100 3.41352800 -3.39445700  |
| P 3.35420900 2.20565000 0.78528200     | C 1.29017400 2.91513600 -2.90515500  |
| P 4.43745200 -0.91590600 -0.16812300   | C 1.24555800 1.96836200 -1.88184800  |
| P 1.86135100 -0.60723500 2.04850600    | H -2.08242400 3.38528800 -3.30986300 |

|    |             |             |             |   |             |             |             |
|----|-------------|-------------|-------------|---|-------------|-------------|-------------|
| H  | 0.08966500  | 4.15406000  | -4.19941500 | O | 1.20121200  | 2.63850300  | 1.25091500  |
| H  | 2.22859000  | 3.26407400  | -3.33900200 | O | -1.08181100 | 2.65950900  | 1.29475100  |
| C  | 3.67697900  | 1.44648500  | -1.27544100 | C | 0.83719700  | 3.97224100  | 1.54630400  |
| C  | 1.91032400  | 0.36303800  | -0.30897100 | C | -0.68902200 | 4.01721100  | 1.31528900  |
| C  | 4.17562900  | 0.51761000  | -0.34448200 | H | 1.05515000  | 4.16001200  | 2.61800200  |
| C  | 4.54476600  | 2.27768900  | -1.98423900 | H | -0.89224100 | 4.45026800  | 0.31477800  |
| C  | 5.53651100  | 0.39958900  | -0.08244900 | H | 0.03017300  | 0.62581400  | 1.57316900  |
| C  | 5.91060000  | 2.15118900  | -1.73129800 | C | -3.26691700 | -1.10797300 | 1.09169300  |
| H  | 4.18105100  | 3.01150000  | -2.70346800 | C | -3.11392600 | -0.89105600 | 2.47539200  |
| C  | 6.40075000  | 1.23078100  | -0.79430400 | C | -3.67440000 | -2.35195000 | 0.56764800  |
| H  | 5.90680400  | -0.30843800 | 0.66177000  | C | -3.32250100 | -1.97574000 | 3.33301800  |
| H  | 6.61226300  | 2.79294900  | -2.27190200 | C | -3.88302300 | -3.39959700 | 1.47270400  |
| H  | 7.47744300  | 1.16676400  | -0.61294300 | C | -3.69924700 | -3.22061700 | 2.83886000  |
| C  | -3.60505600 | 1.62969100  | -1.24829400 | H | -3.19840600 | -1.84052100 | 4.41032400  |
| C  | -1.88999200 | 0.44245900  | -0.30721700 | H | -4.19926200 | -4.37680800 | 1.09680800  |
| C  | -4.14647900 | 0.70495500  | -0.33872700 | H | -3.86221600 | -4.05579100 | 3.52728000  |
| C  | -4.43280900 | 2.51909400  | -1.93442200 | C | 3.18577000  | -1.18029800 | 1.16887300  |
| C  | -5.51135800 | 0.64521300  | -0.07668900 | C | 3.47210300  | -2.48936400 | 0.73037800  |
| C  | -5.80245800 | 2.45375600  | -1.67985000 | C | 3.06589300  | -0.85448000 | 2.53334000  |
| H  | -4.03582400 | 3.25173800  | -2.63704200 | C | 3.55295300  | -3.49340700 | 1.70170700  |
| C  | -6.33533500 | 1.53509400  | -0.76462200 | C | 3.14659900  | -1.89751100 | 3.46194200  |
| H  | -5.91394700 | -0.06286300 | 0.65059700  | C | 3.37310600  | -3.20727300 | 3.05132400  |
| H  | -6.47288700 | 3.14259900  | -2.20180200 | H | 3.76970400  | -4.52058000 | 1.39429800  |
| H  | -7.41350700 | 1.51926100  | -0.58145000 | H | 3.04469900  | -1.67618000 | 4.52798100  |
| N  | -2.23871700 | 1.42161800  | -1.21424600 | H | 3.43285400  | -4.01023200 | 3.79281700  |
| N  | -3.07700400 | -0.01154600 | 0.19169200  | C | 2.94900900  | 0.58175100  | 3.00016700  |
| N  | 2.30231700  | 1.30704600  | -1.23448200 | C | 4.31307600  | 1.09164000  | 3.47374800  |
| N  | 3.07379400  | -0.13375500 | 0.20092200  | C | 1.89161000  | 0.77781800  | 4.08021300  |
| Co | 0.00897000  | 0.21196300  | -0.03447200 | H | 2.64011800  | 1.19788700  | 2.14455500  |
| H  | -0.14093200 | -2.35791100 | 1.92251800  | H | 5.07512600  | 1.01145500  | 2.67984600  |
| C  | 0.81442600  | -1.72627800 | -3.56312300 | H | 4.24435500  | 2.15549400  | 3.76489000  |
| C  | -0.68136000 | -1.35261200 | -3.58398400 | H | 4.67278500  | 0.52108100  | 4.35009300  |
| H  | 0.93341700  | -2.77884500 | -3.89565800 | H | 0.91587700  | 0.39283700  | 3.74659300  |
| H  | -0.77348000 | -0.26181700 | -3.75977300 | H | 2.15842800  | 0.27965100  | 5.03043300  |
| B  | 0.00213000  | -1.53130400 | -1.44676900 | H | 1.76915500  | 1.85370800  | 4.29625000  |
| O  | 1.17429800  | -1.65584100 | -2.19594600 | C | 3.76806300  | -2.81972800 | -0.72191800 |
| O  | -1.12254700 | -1.62899700 | -2.26718800 | C | 2.97594400  | -4.01722100 | -1.23958600 |
| N  | -0.04759800 | -1.72453200 | -0.00141800 | C | 5.26707400  | -3.06251500 | -0.92204300 |
| C  | -0.11977100 | -2.64881900 | 0.85805800  | H | 3.46606600  | -1.95492600 | -1.33019600 |
| C  | -0.18361100 | -4.11314700 | 0.59200000  | H | 1.89532300  | -3.84750000 | -1.14255500 |
| H  | 0.66343100  | -4.61464300 | 1.09553900  | H | 3.19212500  | -4.17094300 | -2.31175200 |
| H  | -1.10970800 | -4.52493800 | 1.03380000  | H | 3.24121700  | -4.95231600 | -0.71389500 |
| H  | -0.15861900 | -4.34961500 | -0.48187400 | H | 5.87410500  | -2.20117800 | -0.60085500 |
| B  | 0.04946100  | 1.86797700  | 1.07063800  | H | 5.60627400  | -3.94746900 | -0.35277100 |

H 5.48489100 -3.24525900 -1.98977800  
C -2.79307200 0.48081500 3.03118200  
C -1.91904700 0.43033600 4.28035100  
C -4.07704700 1.26732700 3.31109900  
H -2.23823200 1.03846200 2.26477000  
H -1.05913700 -0.24613900 4.14517600  
H -1.52366100 1.43659800 4.50288600  
H -2.48025400 0.09459400 5.17149500  
H -4.68728300 1.39367400 2.40145000  
H -4.69824800 0.76024200 4.07266500  
H -3.82878900 2.27626600 3.68729000  
C -3.93916100 -2.58260200 -0.91042200  
C -5.44082200 -2.70329500 -1.18496400  
C -3.21574900 -3.81284800 -1.45365100  
H -3.54816700 -1.71614900 -1.46387300  
H -5.99716800 -1.81176600 -0.85550600  
H -5.62080500 -2.82825800 -2.26786300  
H -5.86962100 -3.58192400 -0.66896200  
H -2.13051300 -3.73130800 -1.30703900  
H -3.57442300 -4.74680200 -0.98446400  
H -3.39463700 -3.89916200 -2.53964700  
C 1.62374500 4.94297800 0.69469600  
H 1.34160700 5.98608800 0.92529800  
H 2.70617700 4.82970400 0.87832100  
H 1.43245600 4.75306500 -0.37620700  
C -1.46555300 4.78634500 2.35883900  
H -2.54688600 4.74690600 2.14178300  
H -1.29747700 4.35600400 3.36224100  
H -1.15686300 5.84677300 2.37524800  
C -1.50964000 -2.10126000 -4.60046200  
H -2.56959600 -1.80173900 -4.53306800  
H -1.15850000 -1.88215400 -5.62434500  
H -1.44335800 -3.19062100 -4.43244900  
C 1.69512500 -0.83076500 -4.40371600  
H 2.75456900 -1.12313500 -4.30240800  
H 1.41981800 -0.90452100 -5.47103800  
H 1.59090200 0.22097400 -4.08532100  
**<sup>1</sup>LCoK**  
C 0.34927400 -0.44215700 -1.56489900  
C -0.83995100 0.02970100 -2.11661500  
C -0.85930100 1.11360700 -2.99732700  
C 0.36723100 1.71278800 -3.32079200  
C 1.58626200 1.24519300 -2.80770600  
C 1.55251800 0.15355900 -1.93883100

H -1.77723400 1.47821900 -3.46284900  
H 0.37551400 2.55819100 -4.01504600  
H 2.51989500 1.71422700 -3.12489000  
C 3.97602200 -0.31217700 -1.22747400  
C 2.24786100 -1.70174300 -0.66280500  
C 4.47868400 -1.35642800 -0.42494200  
C 4.82761300 0.68363200 -1.70772700  
C 5.82319500 -1.43490000 -0.07384800  
C 6.17485900 0.60781600 -1.35193700  
H 4.46838300 1.49392800 -2.34321500  
C 6.66697800 -0.43039000 -0.54867600  
H 6.20375600 -2.25189600 0.54393300  
H 6.86367000 1.37497300 -1.71683500  
H 7.73070200 -0.45827700 -0.29663400  
C -3.27962500 -0.69917300 -1.78017600  
C -1.51769200 -1.94605300 -1.01152100  
C -3.78189000 -1.85179700 -1.14216900  
C -4.14767500 0.26125900 -2.30131200  
C -5.14856900 -2.08063400 -1.01041800  
C -5.51796600 0.03389100 -2.16270100  
H -3.78236600 1.16118400 -2.79775100  
C -6.01216500 -1.11520200 -1.52988800  
H -5.53147800 -2.97873000 -0.51981000  
H -6.22156600 0.76932100 -2.56308000  
H -7.09269200 -1.26110700 -1.44594300  
N -1.90565100 -0.79807000 -1.68893300  
N -2.68352000 -2.57826100 -0.71393200  
N 2.62170400 -0.55544600 -1.34558500  
N 3.40036400 -2.16914100 -0.11383000  
C 3.49984500 -3.37235800 0.66801800  
H 4.13964500 -4.11698000 0.16329300  
H 3.92326300 -3.16001200 1.66496600  
H 2.49080600 -3.79350300 0.78724600  
C -2.77826600 -3.85430200 -0.05714300  
H -3.35877200 -3.77674600 0.87773300  
H -3.26410900 -4.59439500 -0.71650500  
H -1.76211100 -4.20364100 0.17598800  
Co 0.36517900 -2.05024400 -0.67073600  
K -0.38983300 1.06735600 1.08971500  
O -1.30286300 3.68357500 0.53985000  
O 1.33376000 3.02883200 0.53109000  
O 0.32746400 -0.56307000 3.26825200  
O -2.21895300 -0.82110600 1.83226600  
O 2.29290400 0.72706700 1.63978400

|                                     |             |             |             |    |             |             |             |
|-------------------------------------|-------------|-------------|-------------|----|-------------|-------------|-------------|
| O                                   | -2.99215300 | 1.87157600  | 1.95416900  | H  | 1.63459300  | 2.10690800  | -2.47828900 |
| C                                   | -0.51773400 | 4.03238100  | -0.57029700 | H  | 2.44871800  | -0.13770100 | -3.26737500 |
| C                                   | -2.67573400 | 3.59146300  | 0.27073700  | H  | 1.40648400  | -2.24323200 | -2.45144600 |
| C                                   | 0.91915700  | 4.19094900  | -0.13821400 | C  | -0.99278700 | -3.56205900 | -0.87369700 |
| C                                   | 2.72004600  | 2.81132800  | 0.55919400  | C  | -1.88067600 | -1.75600000 | 0.20885100  |
| C                                   | -0.72219200 | -1.41441500 | 3.65907200  | C  | -2.04280000 | -4.00475100 | -0.04168200 |
| C                                   | 1.46952800  | -1.20812600 | 2.75738900  | C  | -0.31859400 | -4.46252200 | -1.70112500 |
| C                                   | -1.57772500 | -1.88178200 | 2.49569300  | C  | -2.42668100 | -5.34216500 | 0.00546600  |
| C                                   | -3.44529900 | -0.41084700 | 2.38022900  | C  | -0.70247700 | -5.80230100 | -1.65027100 |
| C                                   | 3.06389900  | 1.89817200  | 1.70912500  | H  | 0.46690100  | -4.13810200 | -2.38369400 |
| C                                   | 2.58839600  | -0.20427100 | 2.64627600  | C  | -1.73457400 | -6.23961300 | -0.80774500 |
| C                                   | -3.37864100 | 3.16062300  | 1.53662700  | H  | -3.24765300 | -5.67653700 | 0.64410700  |
| C                                   | -3.90447200 | 0.83830900  | 1.67617700  | H  | -0.18946400 | -6.52537300 | -2.29109400 |
| H                                   | -0.86296900 | 4.98873000  | -1.01474000 | H  | -2.01160300 | -7.29768700 | -0.79775100 |
| H                                   | -2.86931000 | 2.86524200  | -0.54800300 | C  | -0.45964200 | 3.70763700  | -0.84761300 |
| H                                   | -3.07913000 | 4.57365200  | -0.05373400 | C  | -1.70505000 | 2.03722600  | 0.09461300  |
| H                                   | 1.02896000  | 5.06872900  | 0.53008300  | C  | -1.53441500 | 4.28853900  | -0.14345600 |
| H                                   | 1.52934300  | 4.36958200  | -1.04498900 | C  | 0.48165300  | 4.50439200  | -1.50066900 |
| H                                   | 3.26970400  | 3.76145700  | 0.70827500  | C  | -1.71278300 | 5.66954600  | -0.10053800 |
| H                                   | 3.04996700  | 2.37063000  | -0.40054000 | C  | 0.30410500  | 5.88621400  | -1.44958200 |
| H                                   | -1.33224700 | -0.83933700 | 4.37576200  | H  | 1.33184600  | 4.07187400  | -2.02837700 |
| H                                   | -0.32485400 | -2.29868600 | 4.19791500  | C  | -0.77679500 | 6.46099700  | -0.76554600 |
| H                                   | 1.26666000  | -1.64911200 | 1.75575700  | H  | -2.55384000 | 6.12152300  | 0.43039200  |
| H                                   | 1.78794600  | -2.02132800 | 3.44078600  | H  | 1.02563500  | 6.53412300  | -1.95574100 |
| H                                   | -0.94791300 | -2.36870400 | 1.72781400  | H  | -0.88885900 | 7.54897900  | -0.75141000 |
| H                                   | -2.31364900 | -2.62768200 | 2.85532800  | N  | -0.60332800 | 2.34810500  | -0.67561500 |
| H                                   | -4.21178400 | -1.20136300 | 2.25060100  | N  | -2.24372800 | 3.24334900  | 0.42472900  |
| H                                   | -3.34951600 | -0.19768700 | 3.46295300  | N  | -0.90711400 | -2.20454900 | -0.66059200 |
| H                                   | 2.86761000  | 2.41794600  | 2.66959700  | N  | -2.52696500 | -2.88362800 | 0.60980600  |
| H                                   | 4.14675200  | 1.66403500  | 1.66207500  | C  | -3.63607500 | -2.91816400 | 1.52534700  |
| H                                   | 2.70367300  | 0.30694200  | 3.62331900  | H  | -4.59489000 | -2.87062400 | 0.98228600  |
| H                                   | 3.53882600  | -0.72971000 | 2.42336800  | H  | -3.59267000 | -3.84448400 | 2.12062600  |
| H                                   | -4.47297400 | 3.21591400  | 1.38824500  | H  | -3.56142000 | -2.05871900 | 2.20193000  |
| H                                   | -3.10776500 | 3.86215000  | 2.34491100  | C  | -3.43528600 | 3.41485600  | 1.21501000  |
| H                                   | -3.98416600 | 0.64744900  | 0.58695900  | H  | -3.44792200 | 4.42991400  | 1.64011300  |
| H                                   | -4.91451400 | 1.09827600  | 2.05087600  | H  | -4.33499500 | 3.25653400  | 0.59836200  |
| H                                   | -0.58734100 | 3.24887400  | -1.35198600 | H  | -3.43023000 | 2.68910400  | 2.03864400  |
| <b><sup>14</sup>W<sub>PMc</sub></b> |             |             |             | Co | -2.02424100 | 0.16019200  | 0.41259900  |
| C                                   | -0.51160400 | 0.05195800  | -0.67957000 | H  | -5.77549500 | 0.34536800  | 1.65117800  |
| C                                   | 0.11935000  | 1.23301900  | -1.15046700 | C  | -4.54526300 | -0.64423200 | -2.42764600 |
| C                                   | 1.17704100  | 1.20106300  | -2.08591500 | C  | -4.83893100 | 0.86160600  | -2.41096100 |
| C                                   | 1.63645200  | -0.08320900 | -2.53845000 | H  | -3.60658800 | -0.85866600 | -2.97726100 |
| C                                   | 1.03831100  | -1.28914700 | -2.07494900 | H  | -5.35638500 | -1.23917000 | -2.88318600 |
| C                                   | -0.05570600 | -1.18524100 | -1.15641000 | H  | -4.38495600 | 1.38928200  | -3.26904700 |

H -5.92930100 1.06423700 -2.42278100  
B -3.92914500 0.18765500 -0.43606100  
O -4.39524600 -0.98179600 -1.07129600  
O -4.28468100 1.31913500 -1.20099200  
N -3.81469100 0.25143500 1.04002000  
C -4.70590800 0.32574700 1.93713200  
C -4.40644300 0.39069300 3.39849900  
H -4.82966500 1.31005400 3.84690500  
H -4.87496400 -0.45703100 3.93444400  
H -3.31743600 0.37125800 3.57448800  
W 1.80320900 -0.10099500 -0.26195200  
P 4.07667000 0.69478700 -0.43363000  
C 5.26710400 -0.41227700 -1.32355100  
C 5.15379200 1.18539100 0.99442800  
C 4.32057400 2.22439400 -1.45189100  
H 4.83548800 -0.68069300 -2.30347800  
H 6.25349300 0.06350200 -1.48025600  
H 5.41245600 -1.34669600 -0.75600300  
H 5.27342100 0.34412100 1.69612700  
H 6.15556900 1.50717100 0.65412900  
H 4.68285500 2.02364800 1.53612800  
H 3.72858900 3.04546700 -1.01166800  
H 5.38247000 2.52880300 -1.49968600  
H 3.95980300 2.05072400 -2.47999600  
P 1.49509100 0.88088300 1.94771500  
C -0.12295200 0.50874700 2.76811200  
C 1.47935300 2.72823100 2.03667000  
C 2.56161200 0.56343200 3.43288900  
H -0.19220200 -0.57515000 2.95318300  
H -0.24422800 1.05184900 3.72478300  
H -0.94334200 0.79251600 2.07564300  
H 0.82112400 3.13299600 1.25297800  
H 1.13742500 3.09597300 3.02181200  
H 2.49644100 3.11339900 1.84922700  
H 3.61954800 0.76259100 3.20497800  
H 2.25425700 1.20277400 4.28110200  
H 2.46241700 -0.48981300 3.74440500  
P 2.59203800 -2.12939000 0.80167300  
C 1.40101000 -2.98058600 1.93276700  
C 4.10977000 -2.23273200 1.86211700  
C 3.00479700 -3.54531800 -0.31793000  
H 0.41402400 -3.02608400 1.44471600  
H 1.72532300 -4.00480100 2.19400000  
H 1.29363500 -2.39480200 2.86150400

H 4.06692100 -1.49117800 2.67266200  
H 4.22074900 -3.23978500 2.30506200  
H 5.00337900 -2.02280700 1.25127400  
H 3.71690800 -3.20710400 -1.09005600  
H 3.44503900 -4.39454400 0.23638800  
H 2.09164700 -3.89982700 -0.82030100  
**<sup>1</sup>W<sub>PMc</sub>**  
C -0.63845300 0.37706500 -0.61986800  
C 0.45422200 1.12575300 -1.12309600  
C 1.32774500 0.61378700 -2.11213800  
C 1.11525600 -0.74746000 -2.52239600  
C 0.02203200 -1.53710200 -2.05094000  
C -0.83437000 -0.93779100 -1.08117300  
H 2.14235300 1.19355400 -2.54349800  
H 1.77947900 -1.18071900 -3.27518600  
H -0.11490000 -2.55170200 -2.42359000  
C -2.80957900 -2.55883600 -0.73992900  
C -2.63465500 -0.57928100 0.38846600  
C -3.89715100 -2.44338500 0.15104400  
C -2.72204700 -3.64707100 -1.61085500  
C -4.89253900 -3.41297300 0.22647700  
C -3.72297600 -4.61578000 -1.53741800  
H -1.91022400 -3.74134800 -2.33310200  
C -4.78687600 -4.50893400 -0.63028100  
H -5.73061200 -3.31305500 0.92039500  
H -3.67657400 -5.47695700 -2.21043100  
H -5.55309900 -5.28899800 -0.60329400  
C 1.13893600 3.57422400 -0.75766400  
C -0.72204300 2.66426400 0.21244500  
C 0.50629500 4.55955600 0.02796600  
C 2.31286800 3.86534100 -1.45389200  
C 1.01849300 5.84952500 0.13802500  
C 2.82586100 5.15756900 -1.34084000  
H 2.82196000 3.11551700 -2.06025600  
C 2.19207100 6.13485500 -0.55974000  
H 0.52051000 6.60843800 0.74623600  
H 3.74539400 5.41208500 -1.87592400  
H 2.62381700 7.13788100 -0.49716000  
N 0.36421300 2.44321200 -0.61457600  
N -0.60457300 3.96212100 0.59852100  
N -2.04112700 -1.43562700 -0.52263500  
N -3.73500400 -1.24383800 0.82253500  
C -4.65540800 -0.76461300 1.81953300  
H -5.64399000 -0.57243900 1.37331200

H -4.74968900 -1.50722900 2.63092600  
H -4.26200900 0.17532500 2.22707900  
C -1.48766100 4.64134800 1.51000800  
H -0.90612500 5.07193300 2.34364600  
H -2.04140400 5.44081800 0.99188700  
H -2.20711200 3.91155400 1.90086400  
Co -1.83560800 1.14820800 0.55780700  
H -3.01041800 1.88270400 1.41675700  
C -5.52690100 2.33578800 -0.81545000  
C -4.62619700 3.52082700 -1.16973300  
H -6.03052700 1.89983100 -1.69662300  
H -6.30951900 2.62545100 -0.08410600  
H -4.27619200 3.45974300 -2.22011500  
H -5.12229000 4.49824100 -1.03199500  
B -3.45598500 2.05089500 0.12121900  
O -4.65333600 1.39875500 -0.23512400  
O -3.53564200 3.39663300 -0.29194300  
W 1.34717300 -0.82659100 -0.28013700  
P 2.25263000 0.38731800 1.64123600  
P 3.56769400 -1.67180700 -0.76667900  
P 0.92679600 -2.76483800 1.12698200  
C 1.09915800 1.47434900 2.59758200  
H 0.18260400 0.91129700 2.84300300  
H 1.56870900 1.84644100 3.52685000  
H 0.80779400 2.33779500 1.98303400  
C 3.58842900 1.61276700 1.28322400  
H 3.26449600 2.28687200 0.47439100  
H 3.84281100 2.21732200 2.17338600  
H 4.49593200 1.08578000 0.94427600  
C 3.02740800 -0.43456900 3.11120900  
H 3.85599500 -1.09405700 2.81320800  
H 3.41459600 0.32074300 3.81944400  
H 2.26752200 -1.03818000 3.63481100  
C 4.53472400 -0.66223400 -1.98155500  
H 4.68516400 0.35061700 -1.56952900  
H 5.52044000 -1.11218000 -2.20070200  
H 3.97692000 -0.56564700 -2.92761300  
C 4.94307200 -1.94875300 0.44640000  
H 5.24528200 -0.98698900 0.89374600  
H 4.62132800 -2.62022900 1.25741300  
H 5.82597700 -2.39103700 -0.05097200  
C 3.61538400 -3.31155400 -1.62224800  
H 2.87983500 -3.30970300 -2.44408400  
H 4.61623300 -3.54939900 -2.02838500

H 3.32422400 -4.10728500 -0.91539700  
C 2.22558800 -3.69152100 2.07061100  
H 1.77157000 -4.50847900 2.66087100  
H 2.94122000 -4.13739000 1.35962600  
H 2.77934000 -3.03106100 2.75278500  
C 0.20069400 -4.24063000 0.28555600  
H 0.86561900 -4.56596900 -0.53279100  
H 0.05776800 -5.08192000 0.98836400  
H -0.77688600 -3.98500900 -0.14655200  
C -0.32357400 -2.53916300 2.46880700  
H -0.55145400 -3.48296900 2.99811200  
H 0.04033400 -1.79551300 3.19752000  
H -1.24805100 -2.13934100 2.02029900  
**<sup>1</sup>TS<sub>Dipp</sub>**  
C -0.10135300 -0.25659500 -2.01763900  
C 1.09609900 -0.48793400 -2.67902300  
C 1.15264600 -0.57518600 -4.07069400  
C -0.04468500 -0.44617900 -4.78412000  
C -1.27435600 -0.24758300 -4.14437800  
C -1.27698300 -0.16024600 -2.75203600  
H 2.08798100 -0.72028500 -4.61188200  
H -0.01953400 -0.50491800 -5.87615700  
H -2.18208700 -0.15576800 -4.74148500  
C -3.73360500 0.01045100 -2.07307200  
C -2.03873600 0.06653200 -0.53662100  
C -4.29260500 0.13256700 -0.79218100  
C -4.55443400 -0.08141700 -3.19839700  
C -5.66790300 0.16333500 -0.58308300  
C -5.93277400 -0.04936700 -2.99337600  
H -4.15018100 -0.18010500 -4.20539200  
C -6.48367600 0.07009000 -1.70882500  
H -6.08216700 0.25758100 0.42299400  
H -6.59874800 -0.12237600 -3.85795600  
H -7.57046000 0.08892300 -1.58784700  
C 3.42965900 -1.08554800 -1.87563200  
C 1.79271400 -0.39965000 -0.42100600  
C 3.94862100 -1.11174200 -0.57434700  
C 4.20307000 -1.51132600 -2.95726700  
C 5.23865400 -1.55646600 -0.30114900  
C 5.49623900 -1.95583500 -2.68810100  
H 3.82140600 -1.51420800 -3.97767300  
C 6.00834300 -1.98049400 -1.38245000  
H 5.62161200 -1.57981400 0.72115400  
H 6.12196900 -2.29904500 -3.51697400

|                |             |             |               |             |             |
|----------------|-------------|-------------|---------------|-------------|-------------|
| H 7.02568500   | -2.34242400 | -1.20869700 | C 3.24782200  | -0.38146700 | 1.64182700  |
| N 2.13478500   | -0.61819300 | -1.74201500 | C 2.88481000  | -1.29671400 | 2.64416300  |
| N 2.93989200   | -0.65994300 | 0.27287200  | C 3.99505300  | 0.78200700  | 1.91974900  |
| N -2.36417000  | 0.00075100  | -1.87404700 | C 3.25981000  | -1.00278100 | 3.95928800  |
| N -3.23100200  | 0.18707700  | 0.10767900  | C 4.36045300  | 1.01856700  | 3.24832700  |
| Co -0.13202100 | -0.07183300 | -0.15371200 | C 3.99093900  | 0.14099600  | 4.26131000  |
| H -1.29022600  | 1.23065300  | 1.73128600  | H 2.98093900  | -1.68899600 | 4.76291100  |
| C 1.35501000   | 5.03570200  | -0.79658600 | H 4.93448000  | 1.91600800  | 3.49569400  |
| C 1.42370800   | 4.19565500  | -2.09518900 | H 4.27731800  | 0.34924300  | 5.29678700  |
| H 2.38304100   | 5.22708500  | -0.42826200 | C -3.47786100 | 0.38154000  | 1.50412900  |
| H 0.61675300   | 4.52279000  | -2.78360400 | C -3.56411800 | 1.70354500  | 1.99178000  |
| B 0.60689500   | 2.91974900  | -0.40563600 | C -3.70755900 | -0.73881200 | 2.31693500  |
| O 0.69598900   | 4.20271100  | 0.13665200  | C -3.88728600 | 1.87351800  | 3.33995200  |
| O 1.14651000   | 2.87512300  | -1.68388700 | C -4.01642200 | -0.51315100 | 3.66410400  |
| N -0.02725000  | 1.85734100  | 0.21081300  | C -4.10934200 | 0.77719700  | 4.17029400  |
| C -0.24556800  | 1.28541300  | 1.39975400  | H -3.95489100 | 2.88324000  | 3.75289700  |
| C 0.67498900   | 1.46852700  | 2.57317600  | H -4.19141500 | -1.36787200 | 4.32435900  |
| H 0.47766300   | 2.46707000  | 3.00908300  | H -4.35536000 | 0.93426400  | 5.22508800  |
| H 0.49033600   | 0.71449800  | 3.35615900  | C -3.63589200 | -2.15257600 | 1.77957100  |
| H 1.73056900   | 1.43232600  | 2.28429900  | C -4.97932900 | -2.87041600 | 1.90573400  |
| B -0.36593100  | -1.97249500 | -0.45997800 | C -2.51092600 | -2.93394300 | 2.45485300  |
| O -1.58479700  | -2.59294000 | -0.69937700 | H -3.37766900 | -2.09735600 | 0.71255100  |
| O 0.66110200   | -2.89730700 | -0.59928700 | H -5.78351300 | -2.31404200 | 1.39313700  |
| C -1.38015500  | -3.96084600 | -1.01403800 | H -4.92104200 | -3.87415700 | 1.44735800  |
| C 0.14760400   | -4.08909800 | -1.17371800 | H -5.27831300 | -3.00281700 | 2.96157400  |
| H -1.71675600  | -4.56456900 | -0.14797300 | H -1.54373700 | -2.43429800 | 2.28870800  |
| H 0.40786300   | -4.07823800 | -2.25074100 | H -2.66904000 | -3.02859700 | 3.54489400  |
| H -0.19867400  | -0.56112200 | 1.27939500  | H -2.44451700 | -3.95424100 | 2.03710000  |
| C 0.75043300   | -5.31325100 | -0.52618900 | C -3.30288700 | 2.90446000  | 1.09878700  |
| H 0.36305600   | -6.23260700 | -1.00036400 | C -2.52008000 | 4.00996500  | 1.80566200  |
| H 1.84816600   | -5.30732400 | -0.63475800 | C -4.60650600 | 3.46385700  | 0.52301300  |
| H 0.50541000   | -5.34644400 | 0.54993600  | H -2.67555800 | 2.56055500  | 0.26044100  |
| C -2.17584700  | -4.35227500 | -2.23774600 | H -1.61695700 | 3.61910500  | 2.30179500  |
| H -1.87312300  | -3.74241400 | -3.10697100 | H -2.18612200 | 4.76031900  | 1.06965100  |
| H -2.01640300  | -5.41770700 | -2.48252900 | H -3.13319800 | 4.53319200  | 2.56155400  |
| H -3.25457400  | -4.19627000 | -2.06459000 | H -5.15750500 | 2.71202300  | -0.06532400 |
| C 0.63189400   | 6.35481500  | -0.94860400 | H -5.27212000 | 3.81807700  | 1.33162100  |
| H 0.59176200   | 6.88927500  | 0.01608700  | H -4.39372200 | 4.32092200  | -0.14084000 |
| H 1.14743500   | 7.00262800  | -1.68023600 | C 4.39226400  | 1.78541100  | 0.85035000  |
| H -0.40367900  | 6.18926300  | -1.29540800 | C 5.90616700  | 1.79496200  | 0.62768100  |
| C 2.74811600   | 4.26857400  | -2.82072300 | C 3.89776100  | 3.19465200  | 1.17846600  |
| H 2.73107200   | 3.62703500  | -3.71844200 | H 3.91362000  | 1.48725100  | -0.09567000 |
| H 2.96610600   | 5.30359900  | -3.13934700 | H 6.28761700  | 0.79808100  | 0.35275500  |
| H 3.56749800   | 3.92165100  | -2.16609600 | H 6.16746500  | 2.49108200  | -0.18947500 |

H 6.44094800 2.12765400 1.53589700  
H 2.80181000 3.23791100 1.28029500  
H 4.34464500 3.57812800 2.11301800  
H 4.18802300 3.88751100 0.36959200  
C 2.16707800 -2.58783200 2.31759200  
C 1.11506800 -2.96393000 3.35703500  
C 3.17977900 -3.72097500 2.13318300  
H 1.64955100 -2.45397800 1.35766000  
H 0.43026800 -2.12313500 3.56003800  
H 0.50888800 -3.81028700 2.98949900  
H 1.56482900 -3.27974700 4.31597900  
H 3.88602700 -3.50267600 1.31405300  
H 3.76683000 -3.88486200 3.05586200  
H 2.66268600 -4.66517000 1.88674600  
**<sup>16</sup>K<sub>Dipp</sub>**  
C 0.77274200 0.18303000 1.35050000  
C 1.42339700 1.36715800 1.71127000  
C 2.61542400 1.36741000 2.43736800  
C 3.15154800 0.12594700 2.81135700  
C 2.53057000 -1.08234700 2.46750800  
C 1.34964900 -1.02973200 1.72277800  
H 3.12247500 2.28456200 2.73780700  
H 4.07784500 0.09910600 3.39257800  
H 2.97359700 -2.02008200 2.79667000  
C 0.71487900 -3.46211100 1.40546400  
C -0.64053200 -1.76229700 0.64531500  
C -0.40636100 -4.02290000 0.78529900  
C 1.70426100 -4.28165100 1.95614000  
C -0.59349300 -5.40028200 0.69231800  
C 1.52301800 -5.65926800 1.86362800  
H 2.58948300 -3.87817900 2.44448700  
C 0.39207200 -6.21346400 1.24317100  
H -1.48355200 -5.81604700 0.21655400  
H 2.27804400 -6.32398800 2.29331800  
H 0.27937100 -7.30016400 1.19826400  
C 1.00842500 3.80001600 1.08768700  
C -0.52285400 2.14968800 0.64099500  
C -0.01687400 4.33772400 0.29571800  
C 2.08801500 4.59019800 1.48926700  
C 0.03426200 5.64252400 -0.18640500  
C 2.12022200 5.90886900 1.03968700  
H 2.88913300 4.20618100 2.12002300  
C 1.12043300 6.42414000 0.20130000  
H -0.74410200 6.02752000 -0.84773000

H 2.95243500 6.55156100 1.34059100  
H 1.19062600 7.45716600 -0.15031500  
N 0.67974300 2.46523000 1.24568300  
N -0.94185000 3.31806100 0.08091800  
N 0.54648000 -2.09547400 1.28292900  
N -1.19857200 -2.96478400 0.33755200  
Co -0.95472900 0.23915600 0.60347600  
H -2.92453900 2.03384700 1.49699300  
C -4.15520900 -0.97940700 -2.91063400  
C -5.37409400 -0.28779300 -2.26594000  
H -4.28579600 -2.07483900 -2.85865100  
H -5.57229300 0.66859000 -2.79438800  
B -3.56397100 -0.08705600 -0.88872400  
O -3.06208400 -0.62872600 -2.07808600  
O -4.95849200 0.00721300 -0.95483100  
N -2.82509600 0.39878500 0.19005300  
C -3.59489800 1.28080700 1.05294000  
C -4.33235700 0.59120500 2.19264000  
H -3.65335500 -0.04517500 2.78393700  
H -4.78457300 1.33491400 2.87582700  
H -5.13984600 -0.04528700 1.80196700  
B -1.12337700 0.21510000 2.49345400  
O -1.25122600 -0.92773000 3.25714600  
O -1.21560600 1.35121900 3.26779700  
C -1.25383000 -0.55123000 4.63209800  
C -1.50700600 0.96962600 4.60819600  
H -0.23952800 -0.74840100 5.03253500  
H -2.58043800 1.17148300 4.78886200  
H -4.34557800 1.83412600 0.46132700  
C -3.93274300 -0.57342100 -4.35032300  
H -3.03895600 -1.05918700 -4.77524800  
H -4.80328200 -0.87180500 -4.96195500  
H -3.81130000 0.51977000 -4.43635000  
C -6.63566800 -1.12113400 -2.26837600  
H -7.45838000 -0.57937900 -1.77094200  
H -6.95204900 -1.35155600 -3.30144300  
H -6.46910700 -2.07096700 -1.73175400  
C -0.66999000 1.76198500 5.58351700  
H -0.87647800 2.84119500 5.48393500  
H -0.89685200 1.46407700 6.62252600  
H 0.40522300 1.59364100 5.39595200  
C -2.26559500 -1.35135800 5.41611400  
H -2.02840700 -2.42745300 5.37093200  
H -2.26003400 -1.04400100 6.47682300



|               |             |             |               |             |             |
|---------------|-------------|-------------|---------------|-------------|-------------|
| H -3.28221400 | -1.19967500 | 5.01428200  | H 0.16541300  | -2.51464800 | -4.07161800 |
| C -2.34827900 | -3.31624700 | -0.44894800 | H -1.50839400 | -3.02021000 | -4.40151900 |
| C -2.11198600 | -3.75561600 | -1.76495400 | H -0.10371400 | -5.67550900 | -2.03640600 |
| C -3.60379100 | -3.44080100 | 0.17256800  | H -0.84022000 | -5.45064100 | -3.64661600 |
| C -3.17101600 | -4.34671900 | -2.46021800 | H 0.80233400  | -4.84770600 | -3.33356100 |
| C -4.63059200 | -4.03542600 | -0.57029900 | C -0.73252200 | 2.61674600  | -2.70958900 |
| C -4.41637500 | -4.50054700 | -1.86357000 | C -0.02165500 | 3.72838800  | -3.48718200 |
| H -3.01384500 | -4.69613700 | -3.48485900 | C -0.97101000 | 1.39650200  | -3.59375600 |
| H -5.61905600 | -4.15129500 | -0.12231800 | H -0.06235200 | 2.30055200  | -1.89394300 |
| H -5.23453500 | -4.97300200 | -2.41535000 | H 0.23928000  | 4.58155100  | -2.83751600 |
| C -2.09256500 | 3.53664100  | -0.74301900 | H 0.91027100  | 3.34933800  | -3.94371900 |
| C -3.21131200 | 4.20697000  | -0.20772900 | H -0.66233700 | 4.10869500  | -4.30296700 |
| C -2.00998500 | 3.16156400  | -2.09625000 | H -1.56587600 | 0.63396300  | -3.06540500 |
| C -4.29237200 | 4.43143200  | -1.06647100 | H -1.50381900 | 1.66258000  | -4.52391300 |
| C -3.12403300 | 3.39904900  | -2.90551700 | H -0.00705400 | 0.94877700  | -3.89391300 |
| C -4.25980200 | 4.01780200  | -2.39360100 | K 4.24205100  | -0.06151300 | -0.29213500 |
| H -5.18372400 | 4.93521300  | -0.68369900 | O 3.67521700  | -2.76647100 | -0.27935300 |
| H -3.09680700 | 3.10882900  | -3.95947600 | O 3.25615300  | 1.48564300  | -2.36763000 |
| H -5.12460600 | 4.19385500  | -3.04037600 | O 6.04839200  | -1.85767700 | 0.95348300  |
| C -3.83573400 | -2.99067500 | 1.60285400  | C 2.83794500  | -3.10818900 | -1.35784100 |
| C -3.30204200 | -4.00568200 | 2.61833200  | C 4.72596100  | -3.66192300 | -0.02412100 |
| C -5.30585000 | -2.70687600 | 1.89497100  | C 3.74174000  | 2.79453500  | -2.52529200 |
| H -3.27397000 | -2.05108100 | 1.73311400  | C 2.98562300  | 0.83842000  | -3.58336900 |
| H -2.21109000 | -4.13531900 | 2.55636500  | C 7.24674400  | -1.80576100 | 0.22160900  |
| H -3.53528800 | -3.66741800 | 3.64283200  | C 5.51511400  | -3.14212200 | 1.15646700  |
| H -3.77435300 | -4.99433800 | 2.47232700  | C 3.42302400  | -2.69311200 | -2.69366300 |
| H -5.75337100 | -2.04552700 | 1.13462600  | H 1.88688400  | -2.58026400 | -1.18099800 |
| H -5.90006800 | -3.63738300 | 1.94227100  | H 2.62017500  | -4.19402200 | -1.35807900 |
| H -5.40385800 | -2.21214300 | 2.87577600  | H 4.32821000  | -4.66667700 | 0.22566000  |
| C -3.27456300 | 4.71383300  | 1.22562200  | H 5.38196900  | -3.77832300 | -0.91027600 |
| C -4.61686300 | 4.42915700  | 1.90345000  | C 4.11210800  | 3.34437500  | -1.16761400 |
| C -3.00406400 | 6.22082500  | 1.30120800  | H 4.61012800  | 2.79609400  | -3.21500100 |
| H -2.48821500 | 4.19653600  | 1.79987200  | H 2.96876100  | 3.45263400  | -2.97002400 |
| H -4.93739000 | 3.38449400  | 1.78064600  | C 2.54082700  | -0.57476900 | -3.32105700 |
| H -4.53957600 | 4.63940100  | 2.98464000  | H 3.89423100  | 0.82062600  | -4.21904900 |
| H -5.41632600 | 5.07867800  | 1.50496900  | H 2.18983800  | 1.36951100  | -4.14080200 |
| H -2.00072500 | 6.49121300  | 0.93976200  | C 7.81026300  | -0.41249100 | 0.31238100  |
| H -3.74612000 | 6.78082800  | 0.70378100  | H 7.98862800  | -2.51458400 | 0.64103000  |
| H -3.08491300 | 6.56667400  | 2.34721900  | H 7.08570800  | -2.07387400 | -0.84250500 |
| C -0.76030800 | -3.62374500 | -2.44082200 | H 4.84585400  | -3.05947600 | 2.02797500  |
| C -0.83164800 | -2.64564600 | -3.61289700 | H 6.31586500  | -3.86509000 | 1.40876600  |
| C -0.19900900 | -4.97519400 | -2.88341900 | O 3.61976300  | -1.30056900 | -2.78238800 |
| H -0.06041900 | -3.20119100 | -1.70422500 | H 4.41146800  | -3.16034000 | -2.84395000 |
| H -1.20708900 | -1.66605300 | -3.27883700 | H 2.76749300  | -3.04882800 | -3.51215100 |

O 5.07716500 2.57468400 -0.49058100  
H 4.45100200 4.39347900 -1.27741600  
H 3.21861500 3.34984300 -0.52406400  
H 1.66468600 -0.57680400 -2.64023600  
H 2.22087200 -1.02081300 -4.28337300  
O 6.94587700 0.48820500 -0.33021000  
H 7.93067500 -0.13783500 1.37971600  
H 8.81311300 -0.39542900 -0.16086600  
C 6.39109500 2.70827700 -0.96861600  
C 7.30649100 1.83447500 -0.15398400  
H 6.46574200 2.41285400 -2.03356500  
H 6.73028800 3.76039400 -0.88259100  
H 8.34934200 2.00682400 -0.48852300  
H 7.24209900 2.11293800 0.91772700  
**'TSIK**  
C -0.01319300 0.13384200 -1.66760600  
C -1.10739100 0.69915400 -2.32785000  
C -0.98331700 1.21403200 -3.61741900  
C 0.27836500 1.15599100 -4.22816600  
C 1.39915500 0.60680500 -3.58813600  
C 1.23239700 0.10291200 -2.29808000  
H -1.83054300 1.62791500 -4.16662300  
H 0.38966800 1.54459200 -5.24456300  
H 2.35142000 0.54932600 -4.11807700  
C 3.50396200 -0.82763700 -1.55529800  
C 1.58628700 -1.18640300 -0.36652000  
C 3.80880200 -1.61822600 -0.43345000  
C 4.50421900 -0.42917600 -2.44123200  
C 5.10230000 -2.06248000 -0.17697500  
C 5.80284800 -0.86405500 -2.17978700  
H 4.29045700 0.20153500 -3.30433100  
C 6.09820400 -1.67204300 -1.07094200  
H 5.32158000 -2.69084100 0.68881700  
H 6.60858200 -0.57235100 -2.85939700  
H 7.12734700 -2.00231900 -0.90504100  
C -3.56764900 0.95729700 -1.64319400  
C -2.06796200 -0.23537000 -0.39927800  
C -4.23074800 0.42426900 -0.52339000  
C -4.24871200 1.75353000 -2.56407800  
C -5.58760600 0.63745100 -0.30240100  
C -5.60692700 1.97598200 -2.33863600  
H -3.74807300 2.19209300 -3.42795200  
C -6.26792400 1.42342500 -1.23141500  
H -6.09239200 0.20480500 0.56401000  
H -6.16951300 2.59156900 -3.04618200  
H -7.33619700 1.61212500 -1.09364300  
N -2.25233400 0.54210900 -1.52552700  
N -3.27869600 -0.27993500 0.21313600  
N 2.14439800 -0.58332900 -1.47544500  
N 2.61743500 -1.80177200 0.26848300  
Co -0.29268500 -0.89130300 -0.13535900  
H -0.63443300 -2.13963600 0.67842700  
C -0.17417600 -3.54672100 -3.34744400  
C -1.54159200 -2.87321700 -3.54623700  
H -0.32104600 -4.60711100 -3.06352500  
H -1.44287100 -2.06086600 -4.29386100  
B -0.60537500 -2.11943500 -1.60710700  
O 0.37955300 -2.86816100 -2.22627500  
O -1.80375600 -2.26031400 -2.28885900  
N -0.06441600 0.00401600 1.71057800  
C -0.37778300 -1.15183000 1.89338300  
C -0.64846000 -2.13759200 2.96419600  
H -0.53608700 -1.67546500 3.95745800  
H -1.67183000 -2.53352400 2.85740800  
H 0.04943800 -2.98654200 2.87280000  
C -3.61112200 -1.01148200 1.40060100  
C -3.57469600 -0.36051300 2.65015500  
C -4.03020700 -2.34839400 1.26595000  
C -3.98699700 -1.08568900 3.77255600  
C -4.42636900 -3.02975200 2.42239900  
C -4.41298200 -2.40512600 3.66389800  
H -3.97228900 -0.60622200 4.75461000  
H -4.75793200 -4.06899400 2.34510000  
H -4.73192000 -2.95227300 4.55616800  
C 2.52661400 -2.64218800 1.42688500  
C 2.27281600 -4.01392900 1.23278100  
C 2.76424300 -2.09889200 2.70519000  
C 2.24110900 -4.83958500 2.36161200  
C 2.72839900 -2.97077400 3.79857700  
C 2.46744900 -4.32650800 3.63345500  
H 2.04750900 -5.90869400 2.23718600  
H 2.90941400 -2.57920100 4.80284000  
H 2.44440300 -4.98925800 4.50382900  
C 3.09701700 -0.63762900 2.92739100  
C 4.60343600 -0.46488800 3.13954900  
C 2.33093800 -0.01572300 4.09218500  
H 2.80088300 -0.08553200 2.02261900  
H 5.18682300 -0.79616500 2.26447300

|               |             |             |                       |            |             |
|---------------|-------------|-------------|-----------------------|------------|-------------|
| H 4.84688300  | 0.59417500  | 3.33306000  | O 3.36002000          | 2.58392500 | -1.25181900 |
| H 4.94384600  | -1.05025100 | 4.01290000  | O -1.17734600         | 4.09900600 | -1.28948000 |
| H 1.24353200  | -0.13205600 | 3.96628400  | O 3.17562100          | 2.51274700 | 1.60749200  |
| H 2.62691800  | -0.44499100 | 5.06553600  | C 3.39934400          | 3.36455800 | -2.42104500 |
| H 2.54480200  | 1.06559200  | 4.13017900  | C 4.49147800          | 2.74266800 | -0.43753400 |
| C 2.08201900  | -4.61960000 | -0.14237700 | C -2.34904400         | 4.58077900 | -0.69562700 |
| C 0.78530500  | -5.42020100 | -0.23571300 | C -0.78396500         | 4.84082200 | -2.41003200 |
| C 3.29115200  | -5.47320000 | -0.53031300 | C 3.41831400          | 3.70482400 | 2.30869200  |
| H 1.99360100  | -3.80305100 | -0.87200900 | C 4.26620400          | 2.02147900 | 0.86650500  |
| H -0.08585500 | -4.79060200 | 0.01059600  | C 2.85040100          | 4.76108600 | -2.19535300 |
| H 0.64693700  | -5.79916500 | -1.26311500 | H 2.79799000          | 2.83299400 | -3.17629800 |
| H 0.78197100  | -6.29444500 | 0.44001000  | H 4.43362900          | 3.43309800 | -2.81335400 |
| H 4.22619700  | -4.88730000 | -0.50108500 | H 5.38602500          | 2.30479400 | -0.92638500 |
| H 3.41099300  | -6.33749500 | 0.14800900  | H 4.70575000          | 3.81510500 | -0.25883900 |
| H 3.17128600  | -5.86419600 | -1.55667800 | C -2.61437500         | 3.79599200 | 0.56701900  |
| C -3.13496900 | 1.08024200  | 2.80976300  | H -2.24675400         | 5.66468500 | -0.48143400 |
| C -2.21770000 | 1.29316100  | 4.01122200  | H -3.22354700         | 4.46480500 | -1.36923500 |
| C -4.34994800 | 2.00567700  | 2.90464600  | C 0.60265700          | 4.43722200 | -2.82340700 |
| H -2.55111200 | 1.35198600  | 1.91798200  | H -0.79328600         | 5.92400500 | -2.17182900 |
| H -1.34629500 | 0.62038000  | 3.97665000  | H -1.47955900         | 4.67235400 | -3.25820300 |
| H -1.83719700 | 2.32813900  | 3.99636000  | C 2.21309300          | 4.06086400 | 3.13858000  |
| H -2.74338200 | 1.14670400  | 4.97133400  | H 4.28794200          | 3.58360600 | 2.98634100  |
| H -4.97083900 | 1.96939300  | 1.99407600  | H 3.64106700          | 4.54224300 | 1.61803000  |
| H -4.98889600 | 1.72332900  | 3.76104600  | H 4.04561700          | 0.96402700 | 0.65415200  |
| H -4.02720200 | 3.05008400  | 3.05800500  | H 5.19608200          | 2.05974800 | 1.46602200  |
| C -4.07707000 | -3.05493600 | -0.07263800 | O 1.50529500          | 4.77175900 | -1.80076800 |
| C -5.51995400 | -3.28931200 | -0.52202700 | H 3.40881100          | 5.26833400 | -1.39073800 |
| C -3.28377200 | -4.35945200 | -0.03783800 | H 2.99000700          | 5.35766600 | -3.12179900 |
| H -3.59112900 | -2.41372700 | -0.82137700 | O -1.51685400         | 3.74447100 | 1.44283400  |
| H -6.08004900 | -2.34039600 | -0.59043000 | H -3.50569600         | 4.21991600 | 1.06954800  |
| H -5.53837400 | -3.76371400 | -1.51963800 | H -2.84009300         | 2.75029800 | 0.30696000  |
| H -6.06092600 | -3.95317500 | 0.17675500  | H 0.62026300          | 3.35370100 | -3.04464000 |
| H -2.24305500 | -4.17837900 | 0.27970700  | H 0.85755900          | 4.97766500 | -3.75876800 |
| H -3.72963100 | -5.10123600 | 0.64853200  | O 1.12129300          | 4.33605100 | 2.30215000  |
| H -3.25364400 | -4.81456900 | -1.04195800 | H 1.96852400          | 3.22868900 | 3.82893300  |
| C -2.66043900 | -3.79749700 | -3.95924400 | H 2.46523600          | 4.94925300 | 3.75370700  |
| H -2.77246600 | -4.62799200 | -3.24165300 | C -1.15785000         | 4.96483200 | 2.03601600  |
| H -3.61627800 | -3.24861400 | -4.01025300 | C -0.02706700         | 4.73513600 | 3.00349500  |
| H -2.45920600 | -4.22481900 | -4.95725900 | H -0.83245300         | 5.70141300 | 1.27616200  |
| C 0.75561500  | -3.46202200 | -4.53383700 | H -2.01758100         | 5.39675300 | 2.58798700  |
| H 0.32443200  | -3.98547800 | -5.40548600 | H 0.16453300          | 5.67945100 | 3.55360900  |
| H 0.93516000  | -2.40780600 | -4.80855900 | H -0.31418800         | 3.96218300 | 3.74423200  |
| H 1.72663600  | -3.93068500 | -4.29880900 | <b><sup>17</sup>K</b> |            |             |
| K 0.72184600  | 2.49766100  | 0.26004900  | C 0.04703000          | 0.19824200 | -1.91182400 |

C 1.22750500 -0.34390500 -2.45041400  
C 1.95940400 0.31997900 -3.43421800  
C 1.49182300 1.56511500 -3.88421200  
C 0.32559100 2.14891400 -3.36379800  
C -0.38033400 1.45216500 -2.38599200  
H 2.85742300 -0.11206200 -3.88001500  
H 2.04736800 2.09129500 -4.66596700  
H -0.00879500 3.11445400 -3.74764000  
C -2.40652000 2.89683600 -1.77453900  
C -2.02237900 0.82914000 -0.83820800  
C -3.45857400 2.60162800 -0.87990000  
C -2.37391200 4.11482600 -2.45175100  
C -4.49071700 3.50484500 -0.64008100  
C -3.41343600 5.01925800 -2.21379500  
H -1.57162800 4.36730800 -3.14542400  
C -4.45342800 4.72183000 -1.32521800  
H -5.29785200 3.27204900 0.05876000  
H -3.41146100 5.97951900 -2.73739600  
H -5.25076800 5.45296900 -1.16379400  
C 2.48500200 -2.51455500 -1.94768500  
C 0.49440400 -1.97010800 -0.93282300  
C 2.12051800 -3.56406000 -1.07712300  
C 3.68426100 -2.56455900 -2.65547000  
C 2.93747100 -4.67686400 -0.89179400  
C 4.50215500 -3.68338300 -2.47210600  
H 3.98690100 -1.76346400 -3.33056100  
C 4.13674400 -4.72220100 -1.60711200  
H 2.65550700 -5.48244500 -0.20953400  
H 5.44680400 -3.74677500 -3.01985800  
H 4.79996200 -5.58380500 -1.48814800  
N 1.47157200 -1.58262000 -1.84863600  
N 0.91622600 -3.20519300 -0.49807800  
N -1.56540300 1.80108100 -1.72994700  
N -3.19870300 1.35073400 -0.35114000  
C -4.05235000 0.70335500 0.60563700  
H -3.77555300 -0.35539800 0.66631400  
H -3.95431400 1.15811300 1.60913600  
H -5.10609000 0.77493100 0.28791600  
C 0.22060200 -4.01848700 0.46026700  
H 0.66955400 -3.93901200 1.46824300  
H -0.82597200 -3.69486800 0.50810100  
H 0.24311100 -5.07557300 0.14862800  
Co -0.97054200 -0.75770200 -0.69250800  
H -4.52238100 -4.78256800 1.13543200

C -0.82533500 -0.76888700 2.39288000  
C -1.53724500 -1.26674200 3.66149800  
H 0.21524300 -1.12710900 2.32638700  
H -0.84357700 0.32858300 2.30509200  
H -0.83716900 -1.67951200 4.40606300  
H -2.12846300 -0.46990900 4.14615600  
B -2.46799600 -2.25040100 1.85677000  
O -1.57599300 -1.33715500 1.32007600  
O -2.41648000 -2.28735800 3.22035600  
N -3.34542800 -3.05148800 1.08214500  
C -4.30409100 -3.91663700 1.77973600  
C -5.59124600 -3.19081700 2.12706600  
H -6.09226300 -2.81827900 1.21623200  
H -6.29148800 -3.86855400 2.64607800  
H -5.39338700 -2.33241900 2.79334600  
B -3.41307500 -2.96844600 -0.33634000  
O -2.57476800 -2.17446600 -1.09285500  
O -4.30968900 -3.65809600 -1.09763400  
C -3.05048500 -2.20847200 -2.43994500  
C -3.98177100 -3.42483600 -2.46333000  
H -3.57985300 -1.26300200 -2.64680400  
H -2.19629100 -2.29098600 -3.12734400  
H -4.90252500 -3.24625000 -3.04042300  
H -3.48215500 -4.32230500 -2.86860700  
H -3.82816800 -4.30060800 2.69582600  
K 1.48779200 1.09179300 0.83985900  
O 1.78653600 1.41835800 3.64579000  
O -0.32990300 2.67824000 2.35062800  
O 3.64301100 2.76155300 0.06344300  
O 3.77507000 -0.13457100 -0.08055800  
O 0.97084700 3.64054300 0.06748900  
O 2.69054800 -0.91943700 2.43200100  
C 0.82839500 2.16461200 4.34585600  
C 2.34206500 0.36767000 4.38792400  
C 0.31181400 3.26130100 3.45324700  
C -0.95080600 3.56990000 1.45586200  
C 4.82423500 2.04628200 -0.20447600  
C 3.05183500 3.38432200 -1.05431400  
C 4.57716500 0.70739900 -0.87566800  
C 4.47215000 -1.02383300 0.75115000  
C 0.01479000 4.45129200 0.69252500  
C 1.99375000 4.34707200 -0.58165700  
C 3.34908800 -0.35996600 3.53773600  
C 3.47289800 -1.75877300 1.61596800

|                                       |                                       |
|---------------------------------------|---------------------------------------|
| H 1.27105900 2.61934300 5.25544600    | H -7.39802300 -1.64831900 -0.69006000 |
| H 1.54963000 -0.33628500 4.71788600   | C 3.60956500 -1.61108800 -1.56710300  |
| H 2.85049400 0.75207500 5.29576400    | C 1.93459300 -0.35916700 -0.64074400  |
| H 1.16234200 3.89541000 3.13656400    | C 4.13759300 -0.86864400 -0.49913200  |
| H -0.39338500 3.89474200 4.02890200   | C 4.41037500 -2.50660200 -2.27690200  |
| H -1.68490600 4.21214000 1.98314300   | C 5.46793300 -0.98238400 -0.10813000  |
| H -1.50085500 2.93204900 0.75029200   | C 5.74298500 -2.62517500 -1.88497000  |
| H 5.31645600 1.89655900 0.77177200    | H 4.01780300 -3.10498800 -3.09942000  |
| H 5.50969600 2.65013800 -0.83430600   | C 6.26578000 -1.87563800 -0.82036500  |
| H 2.59863900 2.64499100 -1.74408400   | H 5.86171000 -0.39117000 0.72142300   |
| H 3.81303500 3.95501900 -1.62411600   | H 6.39348600 -3.32337100 -2.41952200  |
| H 4.03848200 0.84828600 -1.82781300   | H 7.31662800 -1.99616700 -0.54225300  |
| H 5.54508900 0.22451900 -1.11078600   | N 2.27651800 -1.24772900 -1.64195100  |
| H 5.02240000 -1.77366700 0.14727700   | N 3.09509600 -0.09620400 0.01103900   |
| H 5.21655700 -0.48704800 1.37368600   | N -2.28006000 -1.24335800 -1.59014100 |
| H 0.51527900 5.17873500 1.36452400    | N -3.07927000 -0.04420200 0.03627800  |
| H -0.56471900 5.03737400 -0.04972100  | Co 0.01401900 -0.09572800 -0.45641000 |
| H 2.44727300 5.08320700 0.11322300    | H -0.80498600 1.54113700 2.46578100   |
| H 1.59586800 4.89937500 -1.45707800   | C 0.15636000 2.46646600 -2.88271300   |
| H 3.82912700 -1.15145200 4.14839700   | C -0.18306700 3.86177100 -2.33381300  |
| H 4.13723900 0.35167400 3.22164900    | H 1.24798200 2.40813000 -3.08101300   |
| H 2.76047200 -2.28565100 0.96473100   | H -1.27048000 4.02118100 -2.47663800  |
| H 4.00634100 -2.51306600 2.22843300   | B -0.01839100 2.41362800 -0.58290200  |
| H -0.01107100 1.51343200 4.66857300   | O -0.16156800 1.64499900 -1.78326000  |
| <sup>16</sup> Dipp                    | O 0.07564000 3.76749700 -0.94164500   |
| C -0.00373900 -1.40550800 -1.77502700 | N 0.01491400 1.64964800 0.54911000    |
| C 1.19357900 -1.78369900 -2.36953400  | C 0.05690100 1.99692900 1.93276400    |
| C 1.20442700 -2.56805200 -3.52373000  | C 0.05688400 3.49130200 2.22399800    |
| C -0.03068100 -2.95412200 -4.06160400 | H -0.85373800 3.97354300 1.82903000   |
| C -1.25249100 -2.57357000 -3.48967600 | H 0.09539400 3.67409600 3.31399300    |
| C -1.21507400 -1.78654900 -2.33799000 | H 0.92923700 3.98546100 1.76236200    |
| H 2.12820600 -2.86056900 -4.02575100  | B 0.04799200 -1.83321100 0.36927900   |
| H -0.04219200 -3.56585800 -4.96847400 | O -1.08193800 -2.55967500 0.73813200  |
| H -2.18684800 -2.87373600 -3.96587200 | O 1.17889400 -2.62785200 0.56910500   |
| C -3.63447700 -1.52366100 -1.56275400 | C -0.69607900 -3.84904300 1.18994100  |
| C -1.91842600 -0.36692300 -0.58630900 | C 0.76334300 -3.97434400 0.72857100   |
| C -4.15098600 -0.74958000 -0.51189500 | H -0.73241900 -3.85141600 2.29733800  |
| C -4.46706600 -2.36021200 -2.30785000 | H 0.78673400 -4.45440100 -0.27146100  |
| C -5.50129500 -0.76960000 -0.17691000 | H 0.95690100 1.55860000 2.40921600    |
| C -5.81886900 -2.38710100 -1.96914700 | C -3.26138100 0.83720500 1.15343100   |
| H -4.08751500 -2.97990300 -3.12035900 | C -3.43516600 2.21832700 0.92131300   |
| C -6.33056800 -1.60363500 -0.92387400 | C -3.35433400 0.27431800 2.43826000   |
| H -5.88808000 -0.14913600 0.63413300  | C -3.65537900 3.03206900 2.03570900   |
| H -6.49446500 -3.03643100 -2.53329900 | C -3.59394300 1.13519600 3.51596400   |

C -3.73351100 2.50096300 3.32023200  
 H -3.76974100 4.10912000 1.90295100  
 H -3.66436500 0.72249700 4.52644800  
 H -3.90693700 3.16390900 4.17341600  
 C 3.30366900 0.81130300 1.10144400  
 C 3.33080000 0.29711700 2.40798900  
 C 3.56351700 2.16912400 0.82114100  
 C 3.60925500 1.18221900 3.45650700  
 C 3.81807200 3.01183900 1.90593900  
 C 3.84449900 2.52682100 3.21090300  
 H 3.62598500 0.80748500 4.48402400  
 H 3.99975600 4.07395300 1.73293400  
 H 4.04740000 3.21003400 4.04127900  
 C -3.42836800 2.81022400 -0.47869100  
 C -3.12466300 4.30519300 -0.49942500  
 C -4.75739400 2.56213900 -1.20073500  
 H -2.63313500 2.29483800 -1.04510400  
 H -2.16485600 4.53895500 -0.01185000  
 H -3.06486100 4.65529600 -1.54382300  
 H -3.92690100 4.89222400 -0.01827900  
 H -4.99427700 1.49266300 -1.30378200  
 H -5.59107300 3.04293000 -0.65707400  
 H -4.72257900 2.99388700 -2.21726100  
 C -3.21458200 -1.21220000 2.69687200  
 C -4.52381800 -1.82231000 3.19982600  
 C -2.07237600 -1.49314000 3.67046000  
 H -2.94532100 -1.70072200 1.75015700  
 H -5.35089200 -1.66064400 2.48802400  
 H -4.40890400 -2.91312000 3.33556300  
 H -4.82540600 -1.39420300 4.17343400  
 H -1.12573200 -1.08070600 3.28954700  
 H -2.26132300 -1.05608500 4.66755300  
 H -1.94205800 -2.58117600 3.80644100  
 C 3.03162400 -1.15322400 2.72056200  
 C 1.73841800 -1.25292900 3.52734600  
 C 4.19556400 -1.84399800 3.42910700  
 H 2.84884000 -1.68051100 1.77398200  
 H 0.90627300 -0.79099300 2.97342700  
 H 1.47644800 -2.30757700 3.71967900  
 H 1.82208400 -0.74321600 4.50464600  
 H 5.12352400 -1.78445800 2.83394500  
 H 4.39964800 -1.40012100 4.42043800  
 H 3.96642800 -2.91362500 3.58507700  
 C 3.60470100 2.70181400 -0.60060000  
 C 4.93511300 2.37068500 -1.28590800  
 C 3.35593900 4.20301300 -0.68922800  
 H 2.79687400 2.19641800 -1.15815700  
 H 5.13422900 1.28946800 -1.33415100  
 H 4.93539300 2.75609800 -2.32137700  
 H 5.77584000 2.84535200 -0.74791000  
 H 2.39393400 4.48826800 -0.23501300  
 H 4.16941500 4.78130500 -0.21632300  
 H 3.32932400 4.50665900 -1.74883100  
 C 1.67848800 -4.73188700 1.66021900  
 H 2.71604700 -4.70382900 1.28573200  
 H 1.66213500 -4.29625500 2.67373100  
 H 1.36906100 -5.78968800 1.73060700  
 C -1.63278000 -4.90507800 0.65228600  
 H -1.33292700 -5.90933000 1.00137500  
 H -2.66498000 -4.71711000 0.99488400  
 H -1.63002200 -4.90046200 -0.45179500  
 C -0.60416900 2.04545300 -4.11676700  
 H -0.37156800 2.70785200 -4.96916800  
 H -0.33299700 1.01418100 -4.40009900  
 H -1.69235200 2.07581800 -3.93083200  
 C 0.55565100 5.01274500 -2.97262000  
 H 0.25186200 5.12485300 -4.02828700  
 H 0.31982600 5.95471900 -2.44880300  
 H 1.64674500 4.86307600 -2.93814200  
**13**  
 C 0.00638600 1.08512700 -0.56094300  
 C 1.20937800 1.77962000 -0.64933900  
 C 1.23289200 3.15727900 -0.86537400  
 C 0.00494300 3.82286700 -0.98243700  
 C -1.22235900 3.15383600 -0.87796900  
 C -1.19750000 1.77646900 -0.66145600  
 H 2.16432600 3.72192900 -0.94034600  
 H 0.00431100 4.90320400 -1.15443700  
 H -2.15442300 3.71605900 -0.96241000  
 C -3.63587000 0.98374200 -0.36052500  
 C -1.85557900 -0.43120800 -0.25862500  
 C -4.09820600 -0.31538500 -0.06151800  
 C -4.52929700 2.04693000 -0.47967000  
 C -5.45053400 -0.58784000 0.12127400  
 C -5.88454300 1.77313300 -0.29322100  
 H -4.19142300 3.05811600 -0.70950300  
 C -6.33978000 0.48007000 0.00107600  
 H -5.80048100 -1.59790300 0.34776200

|               |             |             |               |             |             |
|---------------|-------------|-------------|---------------|-------------|-------------|
| H -6.60761600 | 2.58916800  | -0.38092000 | C 1.55213400  | -1.03147300 | -1.46933600 |
| H -7.41073200 | 0.30447600  | 0.13751900  | C 1.40089900  | -1.12330700 | -2.85240500 |
| C 3.64833700  | 0.99165400  | -0.33545600 | C 1.04540600  | 0.03931000  | -3.55086100 |
| C 1.86938400  | -0.42593500 | -0.23562200 | C 0.81530800  | 1.26060100  | -2.89980800 |
| C 4.11103300  | -0.30641500 | -0.03236100 | C 0.96020500  | 1.29923000  | -1.51156300 |
| C 4.54108500  | 2.05518800  | -0.45676900 | H 1.55777200  | -2.05450400 | -3.39935100 |
| C 5.46331600  | -0.57711300 | 0.15360300  | H 0.94245100  | -0.00730900 | -4.63904800 |
| C 5.89631500  | 1.78287000  | -0.26797500 | H 0.54874000  | 2.14223400  | -3.48580700 |
| H 4.20282800  | 3.06528900  | -0.69085900 | C 0.40323800  | 3.68984000  | -0.75420700 |
| C 6.35195000  | 0.49104400  | 0.03116700  | C 1.08719800  | 2.06569300  | 0.69894400  |
| H 5.81361200  | -1.58620700 | 0.38378100  | C 0.47411800  | 4.23624200  | 0.54245000  |
| H 6.61902000  | 2.59898800  | -0.35789900 | C -0.03283500 | 4.46410600  | -1.82781100 |
| H 7.42285600  | 0.31659600  | 0.16943800  | C 0.12602400  | 5.55801500  | 0.80253500  |
| N 2.27438500  | 0.87523300  | -0.44921700 | C -0.38535400 | 5.78931700  | -1.56748300 |
| N 2.99536600  | -1.12782700 | 0.02284400  | H -0.10520700 | 4.06058300  | -2.83832500 |
| N -2.26172600 | 0.86905600  | -0.47248200 | C -0.30623400 | 6.33017300  | -0.27622400 |
| N -2.98157200 | -1.13543400 | -0.00479700 | H 0.18611400  | 5.97340800  | 1.81126300  |
| C -3.00083200 | -2.54242800 | 0.30387200  | H -0.72725000 | 6.42037300  | -2.39294000 |
| H -3.53562600 | -2.71518700 | 1.25326100  | H -0.58588800 | 7.37460700  | -0.11152900 |
| H -3.49491600 | -3.11297300 | -0.50152600 | C 2.22434500  | -3.36796000 | -0.62296800 |
| H -1.95783500 | -2.87623000 | 0.39935600  | C 1.98440500  | -1.57290700 | 0.77162900  |
| C 3.01681200  | -2.53390300 | 0.33601500  | C 2.49333100  | -3.77411400 | 0.69904300  |
| H 3.52738800  | -3.10299200 | -0.46006400 | C 2.29245600  | -4.28024000 | -1.67519500 |
| H 3.53636000  | -2.70099700 | 1.29471200  | C 2.83173300  | -5.08810500 | 1.00814100  |
| H 1.97460800  | -2.87296700 | 0.41654500  | C 2.63256800  | -5.59761300 | -1.36522000 |
| Co 0.00749100 | -0.74621600 | -0.32863800 | H 2.09404300  | -3.98715900 | -2.70664000 |
| H 0.02198200  | -4.38363600 | -1.26623600 | C 2.89695000  | -5.99721900 | -0.04775700 |
| C -0.03359500 | 0.44541800  | 3.65545500  | H 3.03844000  | -5.39458300 | 2.03628400  |
| C -0.11510100 | -1.08445900 | 3.73154400  | H 2.69760300  | -6.33338800 | -2.17193400 |
| H 0.93977900  | 0.82841600  | 4.01523100  | H 3.16181200  | -7.03860300 | 0.15597200  |
| H -0.83106000 | 0.94833000  | 4.22849600  | N 1.91070400  | -2.02254900 | -0.53472600 |
| H 0.64807900  | -1.52427900 | 4.39626200  | N 2.34420000  | -2.65390300 | 1.50238400  |
| H -1.10828500 | -1.43116400 | 4.07496900  | N 0.79105300  | 2.37123100  | -0.61696000 |
| B -0.02113300 | -0.42227000 | 1.55445900  | N 0.89540600  | 3.21862200  | 1.38447200  |
| O -0.16989400 | 0.74134200  | 2.27774800  | C 1.09852000  | 3.38447100  | 2.79922300  |
| O 0.09661400  | -1.51739400 | 2.39840700  | H 1.85924700  | 4.16162700  | 2.98678900  |
| N 0.01720100  | -2.33221700 | -1.12685800 | H 0.15569400  | 3.67037300  | 3.29501800  |
| C 0.02395600  | -3.39454400 | -1.78791200 | H 1.44172700  | 2.42775100  | 3.21247800  |
| C 0.03523700  | -3.48682900 | -3.29167400 | C 2.53747800  | -2.66433000 | 2.92867700  |
| H 0.92671000  | -4.03919900 | -3.64582300 | H 1.82913000  | -3.36103500 | 3.40642400  |
| H -0.85086800 | -4.03918300 | -3.65911300 | H 3.57045500  | -2.96715500 | 3.17232600  |
| H 0.03851800  | -2.47686800 | -3.73391500 | H 2.34732500  | -1.65304000 | 3.30878800  |
| <b>15K</b>    |             |             | Co 1.67249100 | 0.28739300  | 1.04338800  |
| C 1.35032300  | 0.17027600  | -0.79065800 | H 3.98429600  | 0.51477800  | 3.18166800  |

C 4.36114200 2.20724400 -2.05894000  
C 4.57632000 0.70600900 -2.31579700  
H 3.62893800 2.65526100 -2.74980700  
H 5.30108900 2.78476200 -2.12243200  
H 3.76714000 0.27104700 -2.92705100  
H 5.54313800 0.48764200 -2.79793300  
B 4.00273300 1.03574500 -0.18104500  
O 3.86861400 2.28048200 -0.72769600  
O 4.54520200 0.10961500 -1.02392000  
N 3.63284500 0.74316400 1.19224100  
C 4.41116700 0.76535100 2.19544400  
C 5.86195000 1.10066400 2.17380300  
H 6.05832200 1.96605300 2.83364100  
H 6.44776600 0.25527300 2.57993900  
H 6.22674500 1.33133100 1.15949600  
B 0.15920900 -0.05696600 2.18191100  
O -0.83907500 0.88410400 2.54670600  
O -0.27875400 -1.33026200 2.61731600  
C -1.64379200 0.30360200 3.55081600  
C -1.49575000 -1.20014000 3.31457400  
H -1.26078300 0.59135900 4.55005800  
H -2.68177000 0.66118500 3.45541400  
H -1.46680300 -1.78217400 4.25268300  
H -2.32439300 -1.60501600 2.70041200  
H 1.44978900 0.26245300 2.63180800  
K -2.06403100 -0.46129600 0.00362000  
O -2.69125700 -3.28335000 0.36328300  
O -4.01698600 1.12732500 1.35751300  
O -1.66867300 -2.20171300 -2.05432900  
C -3.87472500 -3.57095200 1.06791800  
C -2.47264100 -4.10261000 -0.75716800  
C -3.95276700 2.51874000 1.17995800  
C -5.29755000 0.65765700 1.67612000  
C -2.63061800 -2.09794500 -3.06949500  
C -1.37484600 -3.49643400 -1.59985700  
C -5.05965800 -2.80629200 0.50906700  
H -3.69774400 -3.29185800 2.12067100  
H -4.09060800 -4.65734700 1.05351900  
H -2.15941100 -5.11937200 -0.44267700  
H -3.40021500 -4.21530500 -1.35294800  
C -2.64205900 2.87141600 0.50753700  
H -4.81835900 2.86122100 0.57819200  
H -4.00695500 3.04885800 2.15338900  
C -5.27356700 -0.84126800 1.81416100

H -6.01572300 0.94023000 0.87953800  
H -5.65669900 1.09661500 2.62985500  
C -2.63274000 -0.68317100 -3.58701300  
H -2.38924700 -2.78306800 -3.90773400  
H -3.64294300 -2.35694500 -2.69837000  
H -0.46108200 -3.40397200 -0.99161600  
H -1.15154900 -4.17293200 -2.44960000  
O -4.89629500 -1.41223700 0.59026300  
H -5.18800800 -3.04166300 -0.56158200  
H -5.98633100 -3.12298000 1.02929700  
O -2.41434400 2.15251300 -0.67879500  
H -2.61248500 3.96379200 0.32147500  
H -1.80900100 2.60400200 1.17607800  
H -4.58294300 -1.13332100 2.63166200  
H -6.29037000 -1.17715500 2.10372300  
O -3.01552500 0.19069600 -2.55856900  
H -1.61835200 -0.42628800 -3.94869400  
H -3.33722500 -0.61444700 -4.44210000  
C -3.30489500 2.39645200 -1.73271800  
C -2.90729900 1.54506200 -2.90908100  
H -4.34516500 2.14488800 -1.44892300  
H -3.27692700 3.46437500 -2.03112300  
H -3.57391600 1.78405000 -3.76368000  
H -1.86685100 1.77789600 -3.20747900  
**<sup>3</sup>LCo**  
C -0.00006600 0.67360900 -0.17551400  
C 1.19535400 1.34630400 0.07153600  
C 1.22656800 2.70769400 0.38107400  
C 0.00001700 3.37899300 0.49348700  
C -1.22655400 2.70768600 0.38146600  
C -1.19540200 1.34630100 0.07187800  
H 2.15572200 3.24820000 0.58024000  
H 0.00005600 4.44679500 0.73329000  
H -2.15566700 3.24815600 0.58093700  
C -3.63988100 0.58273100 -0.07700900  
C -1.93172100 -0.91449300 0.19635000  
C -4.17630000 -0.72119700 -0.09370900  
C -4.46775900 1.69254000 -0.24831200  
C -5.53909100 -0.95358000 -0.25870700  
C -5.83326900 1.45909100 -0.41542100  
H -4.06931500 2.70772100 -0.26276600  
C -6.36348700 0.16118100 -0.41560700  
H -5.94598600 -1.96767600 -0.26877900  
H -6.50443300 2.31203700 -0.55211500



H -7.44014200 0.01900600 -0.54626700  
C 3.63986600 0.58272000 -0.07724000  
C 1.93163300 -0.91451100 0.19573000  
C 4.17629800 -0.72121400 -0.09373300  
C 4.46780500 1.69251900 -0.24834500  
C 5.53912600 -0.95359700 -0.25841000  
C 5.83336200 1.45906500 -0.41507100  
H 4.06938300 2.70770400 -0.26294700  
C 6.36357300 0.16115500 -0.41511000  
H 5.94601000 -1.96769700 -0.26842500  
H 6.50456200 2.31201000 -0.55159800  
H 7.44025700 0.01896700 -0.54550900  
N 2.27856000 0.42468100 0.09275700  
N 3.10839500 -1.58646000 0.07120300  
N -2.27861500 0.42468200 0.09337800  
N -3.10842900 -1.58644800 0.07144100  
C -3.23065600 -3.01769200 0.13562700  
H -3.93605500 -3.31367700 0.93172500  
H -3.58281000 -3.42837500 -0.82685400  
H -2.23570500 -3.43079000 0.36155300  
C 3.23050600 -3.01772100 0.13511700  
H 3.58092600 -3.42849800 -0.82796700  
H 3.93723500 -3.31379000 0.92998900  
H 2.23587800 -3.43066500 0.36277500  
Co 0.00004400 -1.21852300 0.18188200  
**<sup>13</sup>Dipp**  
C 0.00923100 1.98726900 -1.16987500  
C 1.20820100 2.68664200 -1.30984400  
C 1.24757600 4.04936000 -1.60631800  
C 0.02802100 4.72361400 -1.75586700  
C -1.20060500 4.07065700 -1.58805600  
C -1.17975800 2.70710400 -1.29373500  
H 2.18326200 4.60189100 -1.70686000  
H 0.03558400 5.79184100 -1.99178500  
H -2.12841900 4.63875600 -1.67496900  
C -3.63475700 1.98904300 -1.07718200  
C -1.89196400 0.57449700 -0.61858700  
C -4.15970000 0.73326800 -0.72170300  
C -4.48314900 3.03576400 -1.44163300  
C -5.52541700 0.47165200 -0.75587000  
C -5.85445300 2.78246400 -1.44824900  
H -4.09980400 4.01579300 -1.72612400  
C -6.36947700 1.52067700 -1.11865400  
H -5.91321000 -0.52233200 -0.52373200

H -6.54101700 3.58574700 -1.73074400  
H -7.44973000 1.35290600 -1.15304400  
C 3.65385400 1.94682300 -1.07968700  
C 1.89677900 0.54995200 -0.62047400  
C 4.16660200 0.69327900 -0.70022300  
C 4.51370000 2.98351600 -1.44662300  
C 5.53102200 0.42288800 -0.71202800  
C 5.88328400 2.72184900 -1.43144200  
H 4.14088200 3.96211700 -1.74909900  
C 6.38624400 1.46160800 -1.07793400  
H 5.90947400 -0.56969800 -0.45935700  
H 6.57842800 3.51723600 -1.71528400  
H 7.46583400 1.28710000 -1.09539500  
N 2.28034800 1.81340400 -1.02623000  
N 3.06977100 -0.11769500 -0.41898800  
N -2.26267500 1.84688500 -1.00880100  
N -3.07106700 -0.08860500 -0.44016600  
Co -0.00187400 0.26926500 -0.47577900  
H -0.00972600 -2.09281700 2.69435700  
C -0.77387400 2.39412000 2.61783700  
C 0.75241300 2.28755800 2.84382500  
H -0.96566900 3.12740000 1.80819400  
H 0.95463000 2.09499900 3.91783300  
B -0.00578400 0.52384500 1.61267700  
O -1.15279800 1.11265100 2.15581400  
O 1.14508000 1.14171100 2.11357000  
N -0.00549700 -0.84710100 1.05848000  
C -0.00971700 -1.99596300 1.59288400  
C -0.01589400 -3.26486300 0.81786300  
H 0.87232900 -3.87299900 1.06933300  
H -0.91057100 -3.86360600 1.06944500  
H -0.01568500 -3.04922000 -0.26170500  
C -3.23787900 -1.45783000 -0.06861100  
C -3.70962600 -1.76021800 1.22200700  
C -3.00569000 -2.45449500 -1.03987000  
C -3.98745000 -3.10171500 1.51439200  
C -3.29579800 -3.77664800 -0.69408500  
C -3.79491600 -4.09804700 0.56612300  
H -4.36221000 -3.36687800 2.50740000  
H -3.12935000 -4.57527600 -1.41992300  
H -4.02349100 -5.13974700 0.81198800  
C 3.23059800 -1.47648000 -0.00766500  
C 3.01156200 -2.50123200 -0.95224600  
C 3.68925900 -1.74105100 1.29620300

C 3.30296000 -3.81190700 -0.56577900  
C 3.96581500 -3.07290200 1.63054600  
C 3.78782300 -4.09622600 0.70875200  
H 3.14808000 -4.63158200 -1.27025800  
H 4.32976000 -3.30846500 2.63498400  
H 4.01673700 -5.12981300 0.98643100  
C -3.91055800 -0.70239000 2.29234500  
C -3.10705700 -1.02472700 3.55241300  
C -5.38773100 -0.51723500 2.64482400  
H -3.51824200 0.24825900 1.90203500  
H -2.03961700 -1.15416300 3.32074800  
H -3.19073700 -0.19392900 4.27459200  
H -3.47491400 -1.93996400 4.05083200  
H -5.99000300 -0.22705700 1.76906800  
H -5.81998900 -1.44452700 3.06363700  
H -5.50075400 0.27686300 3.40459300  
C -2.45817700 -2.09801100 -2.41193100  
C -3.52690100 -1.46405000 -3.30682100  
C -1.82427400 -3.28125100 -3.13382000  
H -1.66271900 -1.34758100 -2.24546700  
H -3.96036000 -0.55158200 -2.86906900  
H -3.09252200 -1.19107100 -4.28496300  
H -4.35236400 -2.17656900 -3.48697300  
H -1.09049100 -3.80607400 -2.50071300  
H -2.58142600 -4.01569700 -3.46226200  
H -1.29922500 -2.92874000 -4.03796700  
C 2.47397800 -2.18765400 -2.33855200  
C 1.86531400 -3.39916100 -3.03546100  
C 3.54205800 -1.56202000 -3.24013300  
H 1.66682000 -1.44412900 -2.19885300  
H 1.13741700 -3.92289100 -2.39413000  
H 1.33998300 -3.07883700 -3.95115100  
H 2.63814000 -4.12726600 -3.34089800  
H 3.95774600 -0.63150300 -2.82367700  
H 4.37956000 -2.26674100 -3.39320500  
H 3.11319000 -1.32230300 -4.22935800  
C 3.87929300 -0.65346500 2.33836500  
C 5.35124500 -0.47052400 2.71292400  
C 3.04881800 -0.93315200 3.59127900  
H 3.50279000 0.28897500 1.91419900  
H 5.97256200 -0.21596900 1.83934700  
H 5.45815300 0.34790200 3.44728000  
H 5.76638400 -1.38691200 3.17117200  
H 1.98513100 -1.06033200 3.34187100

H 3.39834800 -1.83715200 4.12241000  
H 3.12691600 -0.08365400 4.29257100  
C -1.56724800 2.78237700 3.84332600  
H -1.26590100 3.78294500 4.20111700  
H -2.64621400 2.81304500 3.61302800  
H -1.40483000 2.05502000 4.65832000  
C 1.52749400 3.50509300 2.39273400  
H 1.22212300 4.39859000 2.96655000  
H 2.61058300 3.35373100 2.54266900  
H 1.34699800 3.69632600 1.32033400  
<sup>16</sup>Dipp  
C 0.14764900 1.37047600 -0.53110700  
C -1.01455100 2.12478100 -0.65686800  
C -0.97629200 3.47075900 -1.02479200  
C 0.27609500 4.04709500 -1.26782800  
C 1.46636400 3.31914500 -1.14926000  
C 1.37461700 1.97714800 -0.77819400  
H -1.87711200 4.07614800 -1.13401400  
H 0.32624300 5.10042400 -1.55938800  
H 2.42073100 3.80832800 -1.35004700  
C 3.78499600 1.12708500 -0.56181200  
C 1.97937200 -0.23153700 -0.24751700  
C 4.23353100 -0.16033600 -0.20975400  
C 4.69548300 2.15447600 -0.80770400  
C 5.58726300 -0.46107600 -0.09102200  
C 6.05190500 1.85398700 -0.68726600  
H 4.37395900 3.15949000 -1.08224100  
C 6.49360700 0.56989900 -0.33539700  
H 5.92406700 -1.46299000 0.18529400  
H 6.78779300 2.64206600 -0.87177600  
H 7.56644500 0.37406800 -0.25038100  
C -3.49220900 1.57486900 -0.28981200  
C -1.84680100 0.01405600 -0.02246600  
C -4.07951700 0.35544100 0.09737200  
C -4.27910100 2.70607100 -0.51500400  
C -5.45704400 0.22691800 0.26005600  
C -5.65702700 2.57668800 -0.34716800  
H -3.84562900 3.66119200 -0.81095700  
C -6.23837500 1.35836000 0.03260700  
H -5.91314000 -0.72192600 0.55134300  
H -6.29728300 3.44712100 -0.51725200  
H -7.32366700 1.29300500 0.15186600  
N -2.13477000 1.31870300 -0.35848900  
N -3.04155000 -0.55532600 0.24991900

|                                      |             |             |                |             |             |
|--------------------------------------|-------------|-------------|----------------|-------------|-------------|
| N 2.40591700                         | 1.03594800  | -0.58385000 | H -2.17884400  | 5.00198500  | -0.36923700 |
| N 3.10217500                         | -0.94394900 | -0.03730600 | H -0.03381700  | 6.21162500  | -0.14233900 |
| C 3.13291300                         | -2.34072200 | 0.31340500  | H 2.11137000   | 5.01181200  | 0.13294600  |
| H 2.09233900                         | -2.69994900 | 0.28519000  | C 3.58372100   | 2.22341900  | 0.41252200  |
| H 3.74192500                         | -2.89910100 | -0.41815700 | C 1.81624900   | 0.80482400  | 0.11959000  |
| H 3.56116500                         | -2.47444000 | 1.32075700  | C 4.06359100   | 0.89595300  | 0.45229100  |
| C -3.24035200                        | -1.92677200 | 0.65547200  | C 4.45787000   | 3.29634400  | 0.58689000  |
| H -2.38251900                        | -2.25151600 | 1.25367500  | C 5.40599800   | 0.60554100  | 0.66838300  |
| H -4.15309400                        | -1.99326000 | 1.26690800  | C 5.80643100   | 3.00452000  | 0.79784100  |
| H -3.33874900                        | -2.59138500 | -0.21796200 | H 4.10820200   | 4.32914200  | 0.56762900  |
| Co 0.05824800                        | -0.43814400 | -0.08722000 | C 6.27497400   | 1.68428000  | 0.83963700  |
| H 0.86667500                         | -2.78857800 | 2.22607400  | H 5.75762700   | -0.42807600 | 0.70706300  |
| C -0.85902000                        | -2.14671300 | -3.05696200 | H 6.51170200   | 3.82878900  | 0.93797300  |
| C -1.52465000                        | -3.50456000 | -2.72616200 | H 7.33813900   | 1.49466300  | 1.01300300  |
| H -1.59792300                        | -1.38193100 | -3.35588900 | C -3.65365600  | 2.20928000  | -0.53132000 |
| H -0.11415600                        | -2.23135200 | -3.87015300 | C -1.88829500  | 0.79764900  | -0.18606500 |
| H -2.62880200                        | -3.43108100 | -2.76419500 | C -4.13611400  | 0.88195400  | -0.52284900 |
| H -1.22006600                        | -4.30035600 | -3.42993300 | C -4.52966900  | 3.27626300  | -0.73320900 |
| B -0.43974800                        | -2.76068600 | -0.86337400 | C -5.48204700  | 0.58416500  | -0.70372900 |
| O -0.21419600                        | -1.77230800 | -1.86599200 | C -5.88069900  | 2.97743700  | -0.91708000 |
| O -1.11987400                        | -3.84115800 | -1.41930500 | H -4.18101300  | 4.30943200  | -0.75141200 |
| N -0.03786000                        | -2.38246500 | 0.38997200  | C -6.35196900  | 1.65731400  | -0.90190800 |
| C -0.04806100                        | -3.04903300 | 1.64867800  | H -5.83536800  | -0.44977500 | -0.69124600 |
| C -0.14791500                        | -4.56807100 | 1.56760500  | H -6.58729100  | 3.79689700  | -1.07762000 |
| H 0.69729400                         | -4.98831000 | 0.99237200  | H -7.41834900  | 1.46415000  | -1.04985400 |
| H -0.13543600                        | -5.02281500 | 2.57535900  | N -2.29194800  | 2.11472000  | -0.31911500 |
| H -1.07606600                        | -4.88037000 | 1.05772400  | N -3.03403400  | 0.06589200  | -0.30400900 |
| B 0.21285200                         | 0.26971600  | 1.66784100  | N 2.22207500   | 2.12423000  | 0.20233600  |
| O 1.40378100                         | 0.45748400  | 2.35078200  | N 2.96073400   | 0.07289600  | 0.25578600  |
| O -0.86313900                        | 0.64450200  | 2.46285600  | Co -0.03394000 | 0.52754700  | -0.03027700 |
| C 1.11425900                         | 0.86912400  | 3.67408300  | C 2.98320900   | -1.34810200 | 0.13465900  |
| C -0.37044600                        | 1.24905600  | 3.64435700  | C 3.54188300   | -1.91889300 | -1.02272700 |
| H 1.31297500                         | 0.03040700  | 4.36781000  | C 2.40171100   | -2.13146400 | 1.15540400  |
| H 1.76870700                         | 1.71127600  | 3.95706100  | C 3.54695200   | -3.31512000 | -1.12646800 |
| H -0.92856800                        | 0.87802000  | 4.52136100  | C 2.41763700   | -3.51914600 | 0.99410800  |
| H -0.51732300                        | 2.34406900  | 3.58181000  | C 2.99340900   | -4.10796000 | -0.12957500 |
| H -0.87912100                        | -2.67974000 | 2.29664900  | H 3.97542500   | -3.78656000 | -2.01579800 |
| <b><sup>1</sup>LC<sub>Dipp</sub></b> |             |             | H 1.97124900   | -4.15703400 | 1.75972300  |
| C -0.03542200                        | 2.33306400  | -0.05388100 | H 2.99847400   | -5.19757300 | -0.23096900 |
| C -1.22799400                        | 3.04166900  | -0.21683200 | C -3.06205700  | -1.34597100 | -0.10697100 |
| C -1.25280100                        | 4.43571700  | -0.24884100 | C -3.43827500  | -1.83838200 | 1.15716000  |
| C -0.03411700                        | 5.11786600  | -0.11788600 | C -2.67229600  | -2.19209000 | -1.16033300 |
| C 1.18428500                         | 4.44148600  | 0.04277400  | C -3.41089700  | -3.22283800 | 1.35023200  |
| C 1.15816800                         | 3.04751700  | 0.07366400  | C -2.64998200  | -3.56903400 | -0.91413800 |

C -3.01627100 -4.08013900 0.32686700  
H -3.69056000 -3.63826900 2.32253700  
H -2.34077900 -4.25390700 -1.70841400  
H -2.99364800 -5.16055200 0.49962500  
C 4.06681400 -1.07843200 -2.17179300  
C 3.14841700 -1.20464300 -3.38912900  
C 5.51278100 -1.42093700 -2.52782300  
H 4.04725800 -0.02336900 -1.86079600  
H 2.11384800 -0.91415900 -3.13895700  
H 3.49856700 -0.54849700 -4.20608500  
H 3.12649100 -2.24051000 -3.77328500  
H 6.17944500 -1.32238200 -1.65387400  
H 5.60850200 -2.45216000 -2.91261500  
H 5.88459900 -0.73896500 -3.31294800  
C 1.79143700 -1.48217000 2.38453400  
C 2.87869900 -0.97246200 3.33355200  
C 0.80917500 -2.37876400 3.12928300  
H 1.21849100 -0.60468900 2.02680700  
H 3.56720200 -0.26881700 2.83698300  
H 2.42515200 -0.44652300 4.19249800  
H 3.47870600 -1.81416900 3.72522200  
H 0.02067800 -2.76948800 2.46222300  
H 1.31166000 -3.23722600 3.61044800  
H 0.31557300 -1.80150400 3.92946500  
C -3.79161700 -0.90374100 2.29809900  
C -2.59863300 -0.75396900 3.24473800  
C -5.05111700 -1.33163800 3.04782200  
H -3.99206300 0.08999500 1.86969400  
H -1.70460500 -0.39703700 2.70381800  
H -2.82550700 -0.02458300 4.04310000  
H -2.34870900 -1.71794700 3.72319900  
H -5.90790100 -1.45346300 2.36205800  
H -4.91028200 -2.28402200 3.58930400  
H -5.32383200 -0.56712300 3.79650400  
C -2.24321000 -1.63931200 -2.50456600  
C -2.85083800 -2.40435500 -3.67876600  
C -0.71725100 -1.59349200 -2.60301300  
H -2.60673300 -0.60066100 -2.56571100  
H -3.94979300 -2.46904200 -3.59325700  
H -2.61432500 -1.89044900 -4.62706700  
H -2.45381000 -3.43193300 -3.75724600  
H -0.29042300 -0.92081600 -1.83076500  
H -0.26938800 -2.59520000 -2.47158600  
H -0.40180600 -1.19919200 -3.58514400

## <sup>16</sup>K

C -0.32798900 -1.01810600 -1.32230000  
C 0.86180100 -1.26126300 -2.00603800  
C 0.93608800 -1.16419200 -3.39684600  
C -0.22849800 -0.80903800 -4.09031600  
C -1.44254100 -0.55922300 -3.43615200  
C -1.46823400 -0.67208600 -2.04622700  
H 1.84788900 -1.39014100 -3.95168200  
H -0.19278600 -0.73866900 -5.18128000  
H -2.32864500 -0.31519500 -4.02304200  
C -3.87621300 -0.15821100 -1.33138500  
C -2.30311900 -0.91125400 0.14356900  
C -4.45969900 -0.27275700 -0.05603800  
C -4.62365900 0.30836400 -2.41408800  
C -5.78807100 0.06758000 0.18277200  
C -5.95423900 0.64994500 -2.17583100  
H -4.20013600 0.41064900 -3.41339600  
C -6.52971600 0.53272400 -0.90142000  
H -6.23021500 -0.02899500 1.17705500  
H -6.56458500 1.01490000 -3.00675500  
H -7.57852400 0.80674800 -0.75749200  
C 3.20357200 -1.92973500 -1.21140200  
C 1.41441500 -1.86081000 0.20420700  
C 3.62250000 -2.31110000 0.07641600  
C 4.11929300 -1.84717400 -2.26068200  
C 4.94863800 -2.62720500 0.35811600  
C 5.44781100 -2.16379300 -1.98026200  
H 3.82370000 -1.54325400 -3.26513100  
C 5.85848200 -2.54947700 -0.69467100  
H 5.26160300 -2.92469400 1.36166600  
H 6.18676200 -2.11310300 -2.78508300  
H 6.90919400 -2.79484100 -0.51660300  
N 1.85308000 -1.66624500 -1.09009900  
N 2.50376900 -2.25158600 0.89678600  
N -2.56053200 -0.54922100 -1.16416700  
N -3.46740100 -0.73018000 0.79980800  
C -3.69238600 -1.00844300 2.19758000  
H -2.74083600 -1.36247400 2.61857100  
H -4.01934500 -0.09405700 2.72154900  
H -4.46584600 -1.78633200 2.30787600  
C 2.51973200 -2.61092400 2.29465900  
H 1.49494800 -2.49204400 2.67605200  
H 2.84682600 -3.65738800 2.41104500  
H 3.20738200 -1.95181600 2.85178500

Co -0.46860600 -1.46092300 0.49881800  
H -2.03822000 -3.66004200 2.31988900  
C 0.34589100 1.19603400 3.30258500  
C -0.21837000 0.68626800 4.62828600  
H 1.45047500 1.23397500 3.31290400  
H -0.04330200 2.18838300 3.02828800  
H 0.44213300 0.91111000 5.48356600  
H -1.21179900 1.13155600 4.83701000  
B -0.39224100 -0.96466100 3.08740600  
O -0.08709600 0.22886900 2.35806700  
O -0.34335900 -0.70468100 4.45557600  
N -0.66115000 -2.08795600 2.35255300  
C -1.04665900 -3.40795400 2.75589600  
C -1.10731300 -3.65125300 4.25752600  
H -1.83333000 -2.98101500 4.74843300  
H -1.40703800 -4.69453300 4.46471800  
H -0.12828900 -3.47440900 4.73559400  
B -0.87336500 -3.09956100 -0.35811100  
O -2.15084200 -3.51112600 -0.68059600  
O 0.05857100 -4.06549300 -0.68189600  
C -2.08929700 -4.85042100 -1.14476500  
C -0.59834700 -5.09778700 -1.40003300  
H -2.49551100 -5.52121000 -0.36572200  
H -2.70568100 -4.95989300 -2.05237900  
H -0.25604900 -6.08182700 -1.03955500  
H -0.34020000 -5.01166000 -2.47161400  
H -0.35191300 -4.15155900 2.30879400  
K 0.58904500 1.80702900 0.12943100  
O 1.13414800 4.18430400 1.54342500  
O -1.48245400 3.29407500 1.30468300  
O 1.09343000 3.26802000 -2.27745400  
O 2.98516000 1.30510300 -1.27153200  
O -1.51007800 2.69471300 -1.40249100  
O 3.01683900 2.13663300 1.44594200  
C 0.06470300 4.88618900 2.11838000  
C 2.32161100 4.24151800 2.28554700  
C -1.17140700 4.66237200 1.28643100  
C -2.66879600 2.91618800 0.65256300  
C 2.42063300 3.15772900 -2.72627200  
C 0.13074800 2.68146200 -3.12054600  
C 2.98458800 1.75355600 -2.60751100  
C 4.20177300 1.47717300 -0.58985900  
C -2.67393100 3.22707200 -0.83004300  
C -1.24188600 3.14100800 -2.70405900

C 3.39811800 3.48349100 1.55313500  
C 3.97203400 1.26742700 0.89000800  
H 0.28256100 5.97327400 2.15581100  
H 2.17025500 3.80536400 3.29419500  
H 2.65473200 5.29141300 2.41715300  
H -0.97666900 5.01732800 0.25577800  
H -2.00352800 5.26296700 1.70741200  
H -3.55241100 3.39563100 1.12161200  
H -2.74911300 1.82835400 0.80711500  
H 3.00850800 3.85587200 -2.10636600  
H 2.50309900 3.49443100 -3.78087600  
H 0.17749000 1.57654500 -3.08363300  
H 0.29768800 2.98954300 -4.17290900  
H 2.37020000 1.04379900 -3.18616900  
H 4.00490900 1.72738400 -3.03509600  
H 4.95228000 0.73873100 -0.93731200  
H 4.61959800 2.48604200 -0.77931300  
H -2.71358900 4.32123500 -1.00486900  
H -3.58640500 2.79043800 -1.28347800  
H -1.28841300 4.24829100 -2.74302800  
H -1.98687700 2.74155200 -3.42159600  
H 4.34980500 3.57706300 2.11460500  
H 3.54401300 3.94273300 0.55563200  
H 3.58179200 0.25066300 1.05792900  
H 4.94133000 1.35395300 1.42137800  
H -0.11268000 4.54133900 3.15767800  
**<sup>15</sup>W<sub>Co</sub>**  
C -0.01680800 -0.23106100 -0.63568100  
C -1.22716800 0.32665300 -1.09774500  
C -1.26021700 1.26767000 -2.16234800  
C -0.01255800 1.70131500 -2.68657500  
C 1.24057800 1.21928600 -2.20079400  
C 1.20353700 0.29687500 -1.12826100  
H -2.18632700 1.66216900 -2.57762900  
H -0.01219500 2.43522100 -3.49529300  
H 2.16729400 1.57492300 -2.64852200  
C 3.62801600 -0.16534300 -0.44400500  
C 1.85290800 -1.32692400 0.41833200  
C 4.10084700 -1.10497200 0.49134700  
C 4.50139500 0.70934800 -1.08482000  
C 5.45315900 -1.21328300 0.79808800  
C 5.85803700 0.60151100 -0.77578300  
H 4.14987600 1.46680100 -1.78630600  
C 6.32786600 -0.34476500 0.14468600

H 5.81443600 -1.94167300 1.52775900  
H 6.56753400 1.27916500 -1.25897500  
H 7.39824000 -0.39706400 0.36334500  
C -3.65159000 -0.06347700 -0.36170900  
C -1.88906500 -1.25904800 0.47815400  
C -4.12735500 -0.97297700 0.60191400  
C -4.51827000 0.81859100 -1.00188200  
C -5.47491500 -1.04173500 0.93972200  
C -5.86997300 0.75011900 -0.66223200  
H -4.16562100 1.55075100 -1.72917100  
C -6.34248000 -0.16526500 0.28779100  
H -5.83758000 -1.74740200 1.69076700  
H -6.57341200 1.43424500 -1.14514700  
H -7.40887800 -0.18723000 0.52974300  
N -2.28583800 -0.28293500 -0.41846100  
N -3.02719700 -1.67579500 1.07267400  
N 2.25620400 -0.34932300 -0.47509900  
N 2.99301500 -1.78752900 0.97434600  
C 3.05498000 -2.79021600 2.00403000  
H 3.68408700 -3.63698200 1.67959900  
H 3.46581500 -2.35827700 2.93144300  
H 2.03366800 -3.14250700 2.19952600  
C -3.09339500 -2.66020700 2.11972000  
H -3.47504400 -2.20329900 3.04793200  
H -3.75015500 -3.49600800 1.82294200  
H -2.07772400 -3.03563700 2.30096200  
Co -0.02077300 -1.60495200 0.59554800  
H -0.01250500 -4.80378400 1.20788100  
C 0.58573400 -2.14376800 -3.62847000  
C -0.95616700 -2.21625900 -3.59925000  
H 0.94960300 -1.10524300 -3.70956800  
H 1.02216700 -2.72806700 -4.45644200  
H -1.42383000 -1.23219900 -3.77106000  
H -1.35905800 -2.92447600 -4.34494200  
B -0.11000300 -2.89435600 -1.62473800  
O 1.00910500 -2.69496300 -2.39260500  
O -1.28401300 -2.67673400 -2.29991400  
N -0.06326700 -3.40916700 -0.26985500  
C -0.04788700 -4.61512700 0.12034800  
C -0.07195500 -5.82034100 -0.75612300  
H 0.82378300 -6.44077200 -0.56714400  
H -0.94868100 -6.44788000 -0.51021700  
H -0.10686300 -5.55933800 -1.82648200  
B 0.05078800 -0.72224800 2.33690100

O 1.22737500 -0.29728700 2.95643700  
O -1.05481300 -0.14458000 2.96378900  
C 0.89112300 0.51772900 4.06003800  
C -0.58818100 0.85449900 3.84911300  
H 1.05482300 -0.04952800 4.99795900  
H 1.53466200 1.41186900 4.07684400  
H -1.17318400 0.83218800 4.78511300  
H -0.71873900 1.84874500 3.38531400  
H -0.02865400 -2.10974700 2.12024300  
W 0.03521900 2.27740600 -0.40356700  
C 1.31247600 2.56276900 1.06928200  
O 2.09573900 2.73018200 1.90968300  
C 0.28835100 4.17474600 -0.82857700  
O 0.44504900 5.28560900 -1.13134100  
C -1.40396000 2.81999800 0.82797700  
O -2.28214500 3.11713500 1.52644100  
**<sup>1</sup>TS2K**  
C -0.13951500 0.66049700 -1.40829800  
C 1.07105000 0.57283400 -2.09756700  
C 1.12678300 0.20663200 -3.44127400  
C -0.08226000 -0.06399600 -4.09607500  
C -1.31991000 0.01973500 -3.44135000  
C -1.32250400 0.38519400 -2.09663600  
H 2.06582400 0.14792800 -3.99413300  
H -0.06106400 -0.34242000 -5.15365300  
H -2.24036900 -0.17841800 -3.99365100  
C -3.75644900 0.26954400 -1.27375700  
C -2.06944800 1.13410600 -0.00441500  
C -4.27481800 0.65454600 -0.02174800  
C -4.57627700 -0.32671200 -2.23177700  
C -5.61521800 0.47077300 0.30672000  
C -5.91857700 -0.51250000 -1.90161800  
H -4.19205700 -0.64540800 -3.20159800  
C -6.43227000 -0.11903300 -0.65687600  
H -6.01047700 0.77830600 1.27783800  
H -6.58643000 -0.97447400 -2.63423900  
H -7.49235500 -0.27640200 -0.43886200  
C 3.49592600 0.85811500 -1.27797000  
C 1.69061000 1.39491000 0.00787400  
C 3.94543200 1.29777200 -0.01667300  
C 4.40376600 0.43534500 -2.24951400  
C 5.29884600 1.33982500 0.30745000  
C 5.75901100 0.47413700 -1.92276600  
H 4.07776600 0.08372800 -3.22880800

C 6.20170200 0.91977800 -0.66826500  
H 5.63999800 1.69271900 1.28352700  
H 6.49355400 0.15257500 -2.66646100  
H 7.27378700 0.94324000 -0.45371300  
N 2.11652500 0.92789600 -1.21888300  
N 2.81656000 1.60138200 0.72873900  
N -2.41020200 0.58055600 -1.22170700  
N -3.21597600 1.17154700 0.70969800  
C -3.34231000 1.67210600 2.05348100  
H -3.74962000 0.88851300 2.71443900  
H -2.34459900 1.97053100 2.39936900  
H -4.01080100 2.54963100 2.07435300  
C 2.85401500 2.08772800 2.08349100  
H 1.83211100 2.05924800 2.48325200  
H 3.51613000 1.45070700 2.69311200  
H 3.22470700 3.12664400 2.11286700  
Co -0.20539600 1.51228900 0.25100500  
H -0.34995800 4.81465900 1.56792200  
C -1.18374500 4.98718200 -1.66807100  
C 0.33628100 4.94449000 -1.87675000  
H -1.74342900 5.07544500 -2.61415900  
H -1.49084100 5.81945100 -1.00768200  
H 0.60364400 4.68658000 -2.91797600  
H 0.83355900 5.89455000 -1.61844800  
B -0.31279300 3.17376000 -0.61980000  
O -1.49157300 3.75439100 -1.03884400  
O 0.78443200 3.91382500 -1.01245200  
N -0.27151000 2.74115200 1.58399400  
C -0.31239100 3.86315900 2.14828600  
C -0.30952400 4.05842900 3.64059300  
H -0.27221400 3.09109800 4.16971400  
H 0.55896200 4.66992000 3.95165700  
H -1.21335600 4.60853200 3.96478200  
K 0.18989900 -1.75968300 0.49882000  
O 1.78314800 -2.80713300 -1.51742400  
O 1.48526800 -1.03668500 2.83282700  
O -1.06709000 -3.22990500 -1.43724600  
C 3.11352900 -3.05919800 -1.13371500  
C 1.16109400 -3.83751600 -2.24386700  
C 0.71881200 -0.78052600 3.98120100  
C 2.73237500 -1.62016400 3.10069100  
C -1.65128900 -4.38605900 -0.89773000  
C -0.25424700 -3.41740400 -2.57088400  
C 3.19910600 -3.79535900 0.19021800

H 3.61034500 -2.07624300 -1.06395300  
H 3.64618400 -3.63870900 -1.91350700  
H 1.70082900 -4.01600400 -3.19650000  
H 1.17000600 -4.79069600 -1.67660600  
C -0.61506500 -0.20331200 3.56263900  
H 0.59710900 -1.71304400 4.56972600  
H 1.22554700 -0.04366200 4.63860800  
C 3.37198400 -2.06460200 1.81173000  
H 2.60990600 -2.49857100 3.76595600  
H 3.40366600 -0.89871500 3.61004800  
C -2.63046500 -3.97826900 0.17167200  
H -2.19763700 -4.94884400 -1.68138100  
H -0.88865500 -5.06457900 -0.46327700  
H -0.22590900 -2.44545400 -3.08920300  
H -0.70630700 -4.16344500 -3.25389600  
O 2.59424900 -3.09237700 1.24979600  
H 2.67077700 -4.76180400 0.12711300  
H 4.26111100 -4.01290300 0.42312600  
O -1.34683900 -1.03205300 2.69262600  
H -1.20692900 0.03467300 4.46966300  
H -0.44289300 0.73155700 3.00269300  
H 3.46920100 -1.20106600 1.12283600  
H 4.39460600 -2.43009200 2.03440200  
O -1.94158100 -3.34627300 1.21982400  
H -3.38470500 -3.29121800 -0.26211300  
H -3.15970500 -4.88088900 0.54002400  
C -1.95446100 -2.15486800 3.27609200  
C -2.78199300 -2.85980500 2.23318400  
H -1.20090100 -2.85892800 3.68210000  
H -2.61801100 -1.84868400 4.11050200  
H -3.33363100 -3.69190700 2.71686400  
H -3.52831100 -2.15744300 1.80951800  
17  
C -0.26833600 -2.00222700 -0.15341600  
C -1.54215400 -2.57671800 -0.25737600  
C -1.72427800 -3.95918600 -0.30172400  
C -0.58452600 -4.77567200 -0.27956000  
C 0.71045200 -4.23806700 -0.25748300  
C 0.84583600 -2.85011800 -0.21171300  
H -2.71395300 -4.41426000 -0.38569500  
H -0.70808600 -5.86236600 -0.31665700  
H 1.57255200 -4.90710400 -0.30657200  
C 3.34036000 -2.36837400 0.04751900  
C 1.82150200 -0.72170100 -0.48325100

C 4.00631100 -1.12254200 0.04525600  
C 4.03221600 -3.53919300 0.35399900  
C 5.36926500 -1.02050400 0.31236800  
C 5.40056600 -3.43451000 0.63083900  
H 3.53420600 -4.50876500 0.38343500  
C 6.05968200 -2.20185000 0.60514300  
H 5.88241100 -0.05590700 0.29447300  
H 5.96367900 -4.34146100 0.87017100  
H 7.13199300 -2.15767900 0.81765800  
C -3.86100600 -1.52221500 -0.06859800  
C -1.99163300 -0.29277700 -0.60941400  
C -4.21696300 -0.15580400 -0.11758800  
C -4.81030700 -2.48893100 0.25917300  
C -5.51791000 0.27197400 0.13449600  
C -6.11775100 -2.05766100 0.51444700  
H -4.55288800 -3.54681600 0.32268400  
C -6.46863700 -0.70589800 0.44876300  
H -5.78578100 1.33077800 0.09503200  
H -6.87966000 -2.79947700 0.77158900  
H -7.50103800 -0.40511800 0.65039900  
N -2.51367000 -1.56534000 -0.36604900  
N -3.07057400 0.54348100 -0.43860400  
N 2.02593200 -2.08681100 -0.26769900  
N 3.05797500 -0.16448700 -0.25370000  
C 3.35128600 1.23666400 -0.34622800  
H 2.40939900 1.79435500 -0.28493000  
H 3.99130300 1.54812900 0.49650700  
H 3.86795500 1.48802000 -1.29161700  
C -3.02563000 1.97047600 -0.57907100  
H -3.16473000 2.47474300 0.39509500  
H -2.04467700 2.24311700 -0.98714100  
H -3.81318200 2.31992700 -1.27025400  
Co -0.04838800 -0.17704200 -0.56896900  
H 0.30096900 5.55890800 -0.03366600  
C -0.50923500 0.62871600 2.44937700  
C -0.25494300 1.71448900 3.50054200  
H -1.58150800 0.39406400 2.33331400  
H 0.03337500 -0.30997900 2.63499000  
H -1.07871300 1.80932400 4.22593200  
H 0.68318400 1.54059800 4.05761100  
B 0.06755800 2.57133700 1.44791300  
O -0.03774000 1.21558900 1.23952100  
O -0.13103200 2.92047000 2.75509400  
N 0.35392300 3.51345200 0.41794300

C 0.61434100 4.90502800 0.79571400  
C 2.07650400 5.15141900 1.12399500  
H 2.71980200 4.93461100 0.25282700  
H 2.23930600 6.20493200 1.41277200  
H 2.40423500 4.51414400 1.96449300  
B 0.45293800 3.14977500 -0.94910000  
O 0.22641500 1.87042100 -1.42887400  
O 0.77462900 4.02745000 -1.94725700  
C 0.56634600 1.86060200 -2.81366400  
C 0.63703200 3.34526900 -3.18644000  
H 1.53313800 1.34207300 -2.93351000  
H -0.20089900 1.30082400 -3.37110800  
H 1.49512400 3.57976600 -3.83668200  
H -0.28438000 3.69251100 -3.68706500  
H -0.01274100 5.15504400 1.66627000  
**<sup>1</sup>W(CO)<sub>3</sub>PhH**  
W 0.08640100 0.00195300 0.00583600  
C 1.29013800 0.49218200 1.50565400  
O 1.95740100 0.78582900 2.40214700  
C 1.28242200 -1.54533400 -0.32745300  
O 1.94220800 -2.47221800 -0.52952600  
C 1.28542800 1.05032200 -1.17777800  
O 1.94832200 1.67468200 -1.88907600  
C -1.82219600 1.04923100 0.95838000  
C -1.82607600 -0.31504600 1.38459600  
C -1.81797300 1.35848100 -0.41589700  
H -1.81076900 1.85133700 1.69921300  
C -1.82105000 -1.35017500 0.42971000  
H -1.81812000 -0.55301400 2.45012600  
C -1.81523500 0.30705200 -1.38459000  
H -1.80471100 2.40014500 -0.74275000  
C -1.81775900 -1.03742200 -0.96542700  
H -1.80971000 -2.39268800 0.75401000  
H -1.79940300 0.54810600 -2.44943300  
H -1.80244400 -1.84136700 -1.70406400  
**<sup>1</sup>TS3W<sub>Co</sub>**  
C -0.05300600 0.18911700 -0.66004100  
C 1.01909400 -0.63883200 -1.03865600  
C 0.89749300 -1.56285000 -2.10142800  
C -0.37840500 -1.66498800 -2.72750000  
C -1.48844300 -0.85565700 -2.36428900  
C -1.29799900 0.05717900 -1.29323900  
H 1.72195500 -2.18193300 -2.45055300  
H -0.50443700 -2.38679800 -3.53727100



H -2.42968400 -0.95471900 -2.90205700  
 C -3.56264600 1.16481100 -0.83408400  
 C -1.63268900 1.82830400 0.19803300  
 C -3.85809400 2.18489200 0.08725300  
 C -4.57116400 0.55523100 -1.57622100  
 C -5.15754100 2.64010400 0.28439600  
 C -5.87461500 1.00967400 -1.37725500  
 H -4.36632500 -0.25351200 -2.27830400  
 C -6.16448000 2.03568900 -0.46728100  
 H -5.38057500 3.43417000 1.00067500  
 H -6.68882600 0.54858800 -1.94326100  
 H -7.19966600 2.36451700 -0.33961300  
 C 3.36032800 -0.93741500 -0.06945700  
 C 1.95781000 0.74028600 0.60904300  
 C 3.96954000 -0.22224200 0.97570400  
 C 3.99259700 -2.03189200 -0.65421700  
 C 5.22589600 -0.56676800 1.46370100  
 C 5.25318700 -2.37661800 -0.16696700  
 H 3.52767200 -2.61146400 -1.45205800  
 C 5.86164100 -1.65735000 0.87105900  
 H 5.69283300 -0.00994300 2.27931700  
 H 5.77420600 -3.23329700 -0.60354500  
 H 6.85018000 -1.96040400 1.22746000  
 N 2.13892800 -0.31659000 -0.26468700  
 N 3.08166600 0.77840200 1.35357200  
 N -2.19033300 0.98918600 -0.74649600  
 N -2.65764900 2.55066000 0.68570800  
 C -2.57095600 3.48615500 1.77728600  
 H -2.80252900 4.50942200 1.43576200  
 H -3.27864300 3.19439900 2.57037700  
 H -1.55313500 3.44978000 2.18490300  
 C 3.29089300 1.60731800 2.51292000  
 H 3.46731200 0.96713900 3.39272200  
 H 4.15511800 2.27655800 2.36629200  
 H 2.38445800 2.19865200 2.68536400  
 Co 0.24517800 1.60641800 0.50049000  
 H -0.17500700 4.21122100 0.52882700  
 C 3.70247200 3.26107800 -2.94987600  
 C 3.03433100 1.98175500 -3.47668000  
 H 3.93013700 3.98599300 -3.75032700  
 H 4.64477700 3.03974100 -2.41219400  
 H 2.58691900 2.13375400 -4.47761200  
 H 3.73455200 1.13087900 -3.54143300  
 B 1.82573300 2.82747600 -1.76008600  
 O 2.76523900 3.80807000 -2.04723000  
 O 2.01577100 1.70077600 -2.54305700  
 N 0.76252000 2.98235900 -0.85384500  
 C 0.74281500 3.63388300 0.32140400  
 C 1.97330900 4.29359300 0.89395400  
 H 2.16658000 5.22214400 0.32642600  
 H 1.84035700 4.56250600 1.95581800  
 H 2.86347700 3.65662500 0.78539100  
 B -0.22927300 0.64918300 2.11503400  
 O -1.51445300 0.53337800 2.61634200  
 O 0.66585800 -0.02966700 2.92278100  
 C -1.50976100 -0.39423300 3.68937800  
 C -0.02571900 -0.59011700 4.02493700  
 H -2.09214500 0.01168100 4.53414900  
 H -1.99048800 -1.33039900 3.35777700  
 H 0.27019600 -0.05483400 4.94683500  
 H 0.25240500 -1.65045800 4.13326500  
 H 0.42525600 2.57383700 1.66217800  
 W -0.77549900 -2.15831200 -0.45966000  
 C -1.14647800 -4.04563600 -0.86899400  
 O -1.35387000 -5.15019800 -1.15949000  
 C 0.21731700 -2.79906500 1.11873500  
 O 0.83129900 -3.17425100 2.02883600  
 C -2.40569700 -2.16878100 0.64852500  
 O -3.38412000 -2.15226200 1.27193700  
**11**  
 C 0.00443200 -1.18423200 -0.15502200  
 C -1.19230800 -1.83192900 0.12852300  
 C -1.21922900 -3.12218300 0.65962800  
 C 0.00959000 -3.74808100 0.91037400  
 C 1.23588000 -3.11750400 0.65904800  
 C 1.20372000 -1.82736800 0.12787800  
 H -2.14841900 -3.64675400 0.88987200  
 H 0.01160800 -4.76098100 1.32410900  
 H 2.16713900 -3.63853400 0.88887000  
 C 3.65198200 -1.05362800 -0.06923300  
 C 1.89223300 0.29040000 -0.63027400  
 C 4.14717300 0.19376700 -0.50064500  
 C 4.52677800 -2.06239800 0.33608300  
 C 5.51050400 0.47145600 -0.53773900  
 C 5.89269600 -1.78360300 0.29830100  
 H 4.16844900 -3.03606500 0.67120200  
 C 6.37944000 -0.53985200 -0.12977100  
 H 5.88387000 1.44259900 -0.87129500

|                    |             |             |                |             |             |
|--------------------|-------------|-------------|----------------|-------------|-------------|
| H 6.60015900       | -2.55697000 | 0.61123600  | H 0.51897700   | 5.83174900  | -2.14882500 |
| H 7.45813400       | -0.35940300 | -0.14343500 | H 2.53870000   | 4.43499000  | -1.85854100 |
| C -3.64297900      | -1.06633500 | -0.06843200 | C 3.71724700   | 1.65462600  | -1.22280600 |
| C -1.88759900      | 0.28223600  | -0.63256400 | C 1.81725800   | 0.46778400  | -0.64403900 |
| C -4.14222400      | 0.17872400  | -0.50199400 | C 4.07062800   | 0.30158700  | -1.04273700 |
| C -4.51444900      | -2.07701900 | 0.33908800  | C 4.68125700   | 2.59920100  | -1.57302600 |
| C -5.50638800      | 0.45213700  | -0.53883900 | C 5.36943900   | -0.14580900 | -1.26055900 |
| C -5.88130000      | -1.80251300 | 0.30153700  | C 5.99437900   | 2.15286000  | -1.76204000 |
| H -4.15284100      | -3.04885000 | 0.67600600  | H 4.43468200   | 3.65330600  | -1.70155600 |
| C -6.37205300      | -0.56106900 | -0.12847300 | C 6.33231900   | 0.80434200  | -1.61873800 |
| H -5.88296900      | 1.42151200  | -0.87393500 | H 5.62140500   | -1.20380200 | -1.16378900 |
| H -6.58620000      | -2.57739200 | 0.61651300  | H 6.76640700   | 2.87720400  | -2.03756900 |
| H -7.45129100      | -0.38386000 | -0.14180400 | H 7.36377800   | 0.48296200  | -1.79032700 |
| N -2.27005800      | -0.96318600 | -0.17046800 | C -3.48037900  | 2.53377900  | -1.14246600 |
| N -3.04407300      | 0.95273300  | -0.84019600 | C -1.96406000  | 0.88748900  | -0.54481600 |
| N 2.27859300       | -0.95429900 | -0.17028800 | C -4.18534800  | 1.33863000  | -0.93810900 |
| N 3.04636700       | 0.96516600  | -0.83640900 | C -4.15488500  | 3.68963300  | -1.54360000 |
| C 3.14049100       | 2.32416500  | -1.30279000 | C -5.55099900  | 1.23736800  | -1.18676300 |
| H 3.59899600       | 2.96233600  | -0.53000300 | C -5.53103500  | 3.59929800  | -1.75896000 |
| H 3.74368200       | 2.36931600  | -2.22582200 | H -3.64156200  | 4.63801000  | -1.69370200 |
| H 2.12619100       | 2.68949900  | -1.50700900 | C -6.21929300  | 2.39101400  | -1.59730900 |
| C -3.14337400      | 2.30982600  | -1.31064400 | H -6.06961200  | 0.28228500  | -1.08418900 |
| H -3.75330600      | 2.35056500  | -2.22945900 | H -6.07696000  | 4.49288800  | -2.07511900 |
| H -3.59748700      | 2.95033600  | -0.53715300 | H -7.29328700  | 2.34719800  | -1.79973200 |
| H -2.13120900      | 2.67548700  | -1.52480000 | N -2.15631500  | 2.22687900  | -0.89704000 |
| Co 0.00018400      | 0.57423900  | -0.76470800 | N -3.25598800  | 0.37911600  | -0.55013400 |
| H -0.00557500      | 2.19783800  | -0.93693300 | N 2.36136800   | 1.71773700  | -0.97642400 |
| C 0.73095400       | 3.05892700  | 2.32612800  | N 2.91839700   | -0.38316200 | -0.67860800 |
| C -0.76970200      | 3.32588600  | 2.17510400  | Co -0.04132700 | 0.47160700  | -0.21140000 |
| H 0.92833400       | 2.29014300  | 3.09954700  | H -1.13711000  | 2.58816700  | 2.13186100  |
| H 1.30695400       | 3.96347200  | 2.58956400  | C -0.17944100  | -2.74068800 | 1.15763200  |
| H -1.34356200      | 3.06775800  | 3.08260200  | C -1.36571200  | -2.65605900 | 2.13719200  |
| H -0.97349700      | 4.38856500  | 1.93320600  | H 0.65740000   | -3.28739000 | 1.62520400  |
| B -0.01477800      | 2.07421900  | 0.41918800  | H -2.31238100  | -2.63672900 | 1.57050000  |
| O 1.12669200       | 2.57860700  | 1.06304000  | B -0.34448900  | -0.64140100 | 2.02473900  |
| O -1.16414800      | 2.50914900  | 1.09695900  | O 0.24895500   | -1.37786900 | 1.01652900  |
| <sup>17</sup> Dipp |             |             | O -1.22034700  | -1.37680000 | 2.76416900  |
| C 0.13283400       | 2.19159600  | -0.85724800 | N -0.11323800  | 0.76618000  | 2.14198200  |
| C -0.98723700      | 2.97966300  | -1.10119700 | C -1.22336200  | 1.60439300  | 2.61893700  |
| C -0.87052300      | 4.29685500  | -1.55236000 | C -1.24211700  | 1.76298500  | 4.12797200  |
| C 0.41234000       | 4.80331700  | -1.79117500 | H -0.31874400  | 2.25267900  | 4.48476900  |
| C 1.55940100       | 4.01949900  | -1.61589600 | H -2.09649600  | 2.39078600  | 4.43799100  |
| C 1.39615000       | 2.71411700  | -1.15423100 | H -1.33357600  | 0.78482100  | 4.63066700  |
| H -1.73540700      | 4.93331300  | -1.73778600 | B 1.19036800   | 1.37838200  | 2.19400100  |

|               |             |             |                                    |             |             |
|---------------|-------------|-------------|------------------------------------|-------------|-------------|
| O 2.36049300  | 0.70126900  | 2.42610200  | H 3.72018900                       | -0.90608000 | 1.51041800  |
| O 1.34020600  | 2.73945200  | 2.23496800  | H 5.89415000                       | -2.05496200 | 0.91888500  |
| C 3.41104700  | 1.66499800  | 2.41989900  | H 5.70312200                       | -1.82936000 | 2.67652800  |
| C 2.68382300  | 3.01025500  | 2.61668100  | H 5.43074100                       | -3.43365100 | 1.95095100  |
| H 3.88526500  | 1.64769600  | 1.42133300  | H 1.98130800                       | -2.02707400 | 2.78868500  |
| H 2.67845000  | 3.26841300  | 3.69482100  | H 3.00024100                       | -3.48848700 | 2.99872200  |
| H -2.16574500 | 1.15920800  | 2.26983300  | H 3.46710600                       | -1.94060100 | 3.75027500  |
| C -0.50419400 | -3.33734500 | -0.18027000 | C -4.71992300                      | -0.04697500 | 1.96964800  |
| H 0.39392200  | -3.38896300 | -0.81251600 | C -4.23924600                      | -0.41127500 | 3.37580500  |
| H -0.90795900 | -4.35728900 | -0.05727400 | C -6.21134300                      | 0.29770800  | 2.02360800  |
| H -1.26103800 | -2.71805200 | -0.68088200 | H -4.17684000                      | 0.85603200  | 1.64866700  |
| C -1.40699500 | -3.75638200 | 3.16656100  | H -3.17805200                      | -0.70043700 | 3.38547800  |
| H -2.27193700 | -3.62699800 | 3.83889600  | H -4.37164700                      | 0.45163600  | 4.05260800  |
| H -1.50461200 | -4.73720100 | 2.66925600  | H -4.82848700                      | -1.24623800 | 3.79667000  |
| H -0.48587600 | -3.76024500 | 3.77534800  | H -6.60445700                      | 0.62327300  | 1.04874700  |
| C 3.25815400  | 4.15878900  | 1.82516500  | H -6.80553400                      | -0.57084300 | 2.36079700  |
| H 2.66319400  | 5.07378000  | 1.98382700  | H -6.38199300                      | 1.11849700  | 2.74290100  |
| H 4.29750400  | 4.36057300  | 2.13875900  | C 2.24766900                       | -1.52816500 | -3.23286500 |
| H 3.25187000  | 3.92698100  | 0.74793400  | C 0.82110300                       | -1.75197100 | -3.72511200 |
| C 4.44180900  | 1.34930300  | 3.47551400  | C 3.27529900                       | -1.76669800 | -4.33963200 |
| H 4.93206200  | 0.38316400  | 3.27026800  | H 2.31901700                       | -0.47074300 | -2.93987500 |
| H 5.22403100  | 2.12840300  | 3.49019200  | H 0.09918300                       | -1.49929400 | -2.93111400 |
| H 3.97391500  | 1.30057100  | 4.47437000  | H 0.60484500                       | -1.10365700 | -4.59322000 |
| C 2.87714000  | -1.80691200 | -0.76501500 | H 0.65463800                       | -2.79952600 | -4.03396600 |
| C 2.55155500  | -2.37648000 | -2.01320100 | H 4.30217700                       | -1.57879400 | -3.98000100 |
| C 3.27488200  | -2.60066500 | 0.32772100  | H 3.23268200                       | -2.80228800 | -4.72322600 |
| C 2.55253300  | -3.77079200 | -2.12311500 | H 3.08569100                       | -1.08715200 | -5.18978800 |
| C 3.24531700  | -3.99167600 | 0.17278100  | C -2.91093800                      | -1.69559200 | -2.55359700 |
| C 2.87999900  | -4.57524900 | -1.03592400 | C -3.83891200                      | -0.90464800 | -3.48219200 |
| H 2.29481900  | -4.23444600 | -3.08029500 | C -2.45505200                      | -2.95863700 | -3.27883200 |
| H 3.53830200  | -4.62997000 | 1.01227200  | H -2.02004800                      | -1.07017600 | -2.36362800 |
| H 2.86885600  | -5.66494700 | -1.13734100 | H -4.11568500                      | 0.07742000  | -3.07171600 |
| C -3.71465600 | -0.93870000 | -0.24171100 | H -3.33863600                      | -0.72920700 | -4.45102800 |
| C -4.43537800 | -1.14491800 | 0.95612100  | H -4.77004800                      | -1.46758100 | -3.67634100 |
| C -3.56625100 | -1.96172400 | -1.20676000 | H -1.79328300                      | -3.59073200 | -2.66374100 |
| C -4.94472500 | -2.42631200 | 1.20108800  | H -3.31334700                      | -3.57331800 | -3.60486800 |
| C -4.08661000 | -3.22344500 | -0.90260700 | H -1.89735900                      | -2.67826200 | -4.18761000 |
| C -4.76312500 | -3.45892300 | 0.29084000  | <b><sup>12</sup>W<sub>CO</sub></b> |             |             |
| H -5.49754500 | -2.61416200 | 2.12603100  | C 0.00103000                       | -0.19729700 | -0.62047900 |
| H -3.97107300 | -4.04082600 | -1.61694200 | C -1.21615800                      | 0.32592600  | -1.10741500 |
| H -5.16433200 | -4.45458700 | 0.50364100  | C -1.25700900                      | 1.31956500  | -2.11678800 |
| C 3.81144100  | -1.99581500 | 1.60940900  | C -0.01175200                      | 1.82731900  | -2.58067700 |
| C 5.28977200  | -2.34877000 | 1.79307200  | C 1.23956000                       | 1.33849700  | -2.11354000 |
| C 3.01602100  | -2.39310900 | 2.84991200  | C 1.21133400                       | 0.34254900  | -1.10574500 |

H -2.18577100 1.70305200 -2.53619500  
H -0.01663300 2.60839700 -3.34380000  
H 2.16358900 1.73618000 -2.53021800  
C 3.65376200 -0.25844000 -0.60356000  
C 1.88176100 -1.38702300 0.31409600  
C 4.13857300 -1.30377500 0.20498500  
C 4.52815200 0.60702000 -1.25598000  
C 5.50151000 -1.53094300 0.36578400  
C 5.89538400 0.38198400 -1.09020500  
H 4.17262100 1.44026900 -1.86334200  
C 6.37530500 -0.66995700 -0.29865700  
H 5.87204100 -2.34800300 0.98915500  
H 6.60644300 1.04733000 -1.58796200  
H 7.45421800 -0.81578100 -0.19422200  
C -3.65071300 -0.30462100 -0.60330300  
C -1.86447800 -1.41215300 0.31275000  
C -4.12238200 -1.35423500 0.20741500  
C -4.53575500 0.55064500 -1.25481200  
C -5.48246400 -1.59584600 0.37148900  
C -5.90010300 0.31107800 -1.08580300  
H -4.19070400 1.38726300 -1.86357800  
C -6.36690100 -0.74507600 -0.29202500  
H -5.84286900 -2.41595600 0.99677300  
H -6.61938000 0.96827100 -1.58258700  
H -7.44395700 -0.90228400 -0.18497000  
N -2.26978300 -0.38483700 -0.52500400  
N -3.00716600 -1.98590100 0.74257700  
N 2.27396400 -0.35389100 -0.52273500  
N 3.03153700 -1.94814000 0.74173200  
C 3.11160400 -3.08849400 1.61678200  
H 3.51936700 -3.95867900 1.07641900  
H 3.75277700 -2.85678500 2.48407700  
H 2.09710500 -3.32506600 1.96342200  
C -3.07341400 -3.12409900 1.62191100  
H -3.70885300 -2.89334100 2.49368000  
H -3.47992300 -3.99842400 1.08749700  
H -2.05473900 -3.35410700 1.96043400  
Co 0.01035600 -1.58075600 0.60490700  
H 0.02184800 -3.10608300 1.09986600  
C 0.79355500 -5.03975000 -1.57585600  
C -0.70888900 -4.85303400 -1.80209100  
H 1.36694700 -5.09289800 -2.51795800  
H 1.00756300 -5.95873700 -0.99395600  
H -0.91690800 -4.39616400 -2.79011300

H -1.27577800 -5.79851700 -1.73884100  
B 0.02888500 -3.30042400 -0.30096400  
O 1.17810300 -3.90507600 -0.83291900  
O -1.10784200 -3.97367800 -0.77640900  
N 0.00389000 -0.65099000 2.31305900  
C 0.00124100 0.10115900 3.18987000  
C -0.00212000 1.09840200 4.23956700  
H 0.88555300 1.74438400 4.13207500  
H -0.90584000 1.72390200 4.14599200  
H 0.01113900 0.62310400 5.23442700  
W -0.01734100 2.26616400 -0.25806600  
C 1.34102500 2.52742700 1.13614000  
O 2.16620000 2.62868900 1.95063700  
C -1.37350900 2.49678000 1.14392800  
O -2.19646500 2.57902700 1.96280600  
C -0.03799100 4.21546200 -0.50895800  
O -0.04982900 5.36065700 -0.70001300  
<sup>31</sup>  
C -0.00323500 -1.25024600 -0.00418700  
C -1.21218000 -1.90793800 0.23441700  
C -1.23414400 -3.22279800 0.69864200  
C -0.00646700 -3.86194400 0.92291600  
C 1.22281400 -3.22506200 0.70088800  
C 1.20418400 -1.91020700 0.23650400  
H -2.16455400 -3.75998700 0.89072300  
H -0.00774400 -4.89415700 1.28549700  
H 2.15182700 -3.76402700 0.89476000  
C 3.65255800 -1.18204300 -0.01896500  
C 1.89571100 0.20221000 -0.51576000  
C 4.15627900 0.05457800 -0.47492700  
C 4.51995000 -2.20898100 0.34936600  
C 5.52386700 0.29723000 -0.57144300  
C 5.89216100 -1.96490900 0.25080100  
H 4.15363900 -3.17286900 0.70349400  
C 6.38736400 -0.73551200 -0.20053200  
H 5.90664100 1.25945500 -0.91964300  
H 6.59281400 -2.75545700 0.53469000  
H 7.46823800 -0.57912100 -0.26237600  
C -3.65845900 -1.17365600 -0.02239000  
C -1.89751100 0.20673900 -0.51640000  
C -4.15862900 0.06527000 -0.47589700  
C -4.52880900 -2.19872100 0.34422000  
C -5.52549100 0.31212400 -0.57213600  
C -5.90031500 -1.95034600 0.24631100

H -4.16532500 -3.16438200 0.69645600  
C -6.39197400 -0.71874000 -0.20289100  
H -5.90535800 1.27599400 -0.91897000  
H -6.60326700 -2.73934500 0.52882700  
H -7.47239900 -0.55917400 -0.26448300  
N -2.28265700 -1.04956600 -0.06391600  
N -3.06631400 0.86180900 -0.76824000  
N 2.27707700 -1.05427700 -0.06071700  
N 3.06613100 0.85332900 -0.76958900  
C 3.18617900 2.18230400 -1.30613900  
H 3.55568500 2.88545800 -0.54192000  
H 3.87693900 2.17611000 -2.16701100  
H 2.19678800 2.51813800 -1.64181000  
C -3.18328000 2.19231300 -1.30164600  
H -3.85831500 2.18710500 -2.17506100  
H -3.57010100 2.89025700 -0.54123600  
H -2.18959200 2.53506300 -1.61618200  
Co 0.00020000 0.53678400 -0.51360900  
H 0.00011300 2.13176900 -0.97025400  
C 0.76820300 4.04639000 1.74163600  
C -0.74425000 3.85794300 1.91177700  
H 1.32248800 3.94067400 2.68923900  
H 1.01897700 5.03063300 1.30271000  
H -0.98828100 3.30814600 2.84002400  
H -1.30181800 4.80944500 1.91664900  
B 0.00856400 2.48102300 0.29122100  
O 1.15451000 3.02388100 0.83903000  
O -1.13106600 3.07948400 0.79340300

### **HBR<sub>2</sub>**

C 0.89301200 0.77105700 -0.01485300  
C 0.89287700 -0.77121200 0.01487500  
H 1.40631300 1.21407800 0.85510700  
H 1.35544900 1.17763900 -0.93057400  
H 1.35525600 -1.17791400 0.93057300  
H 1.40607700 -1.21430200 -0.85510900  
B -1.22128500 0.00010600 -0.00003400  
H -2.42916600 0.00022200 0.00017400  
O -0.48153100 -1.14032600 -0.01387600  
O -0.48132300 1.14041000 0.01386000

### **<sup>3</sup>TS1**

C 0.00607700 1.49394300 -0.16171600  
C 1.20594200 2.10314200 0.16679600  
C 1.24131000 3.39299400 0.70158000  
C 0.01331500 4.02845300 0.93483700

C -1.21811400 3.39823600 0.70598700  
C -1.19009000 2.10846000 0.17048500  
H 2.16947600 3.90075500 0.97287200  
H 0.01621800 5.03931200 1.35407000  
H -2.14312900 3.90972600 0.98099300  
C -3.64036400 1.38268100 -0.09294900  
C -1.92430800 -0.11412800 -0.22546100  
C -4.16820100 0.10590100 -0.36396400  
C -4.47873400 2.49275600 0.01130700  
C -5.53467600 -0.10466100 -0.52556600  
C -5.84738000 2.28142700 -0.14982800  
H -4.08820300 3.49334600 0.19921000  
C -6.36941500 1.00575800 -0.40980600  
H -5.93640400 -1.09725900 -0.74185500  
H -6.52838200 3.13418500 -0.07557700  
H -7.44917800 0.88045500 -0.53114200  
C 3.65320400 1.36585400 -0.09588900  
C 1.93104900 -0.12384500 -0.22358700  
C 4.17597100 0.08525200 -0.35849200  
C 4.49629500 2.47287800 0.00300700  
C 5.54172200 -0.13249300 -0.51671800  
C 5.86416400 2.25448200 -0.15485500  
H 4.10978100 3.47630100 0.18401300  
C 6.38107500 0.97495600 -0.40643000  
H 5.93911300 -1.12829400 -0.72618100  
H 6.54881400 3.10467600 -0.08483200  
H 7.46046500 0.84433700 -0.52542300  
N 2.28336900 1.19471400 -0.01941100  
N 3.09315300 -0.78003800 -0.41790200  
N -2.27143300 1.20525200 -0.01520500  
N -3.08923500 -0.76391900 -0.42645700  
C -3.21396700 -2.17541700 -0.69025200  
H -4.06347400 -2.58251600 -0.11849900  
H -3.37429300 -2.35838600 -1.76664300  
H -2.29870300 -2.67289300 -0.35075100  
C 3.21230800 -2.19441000 -0.66885900  
H 3.39310500 -2.38612200 -1.74050100  
H 4.04658400 -2.60423500 -0.07690100  
H 2.28647300 -2.68324500 -0.34554000  
Co 0.00044500 -0.45580100 -0.33364100  
H 0.00334700 -2.37694300 -0.39564500  
C -0.78409600 -3.22924000 2.79829100  
C 0.71872700 -2.98773100 2.96477200  
H -1.36282800 -2.99183700 3.70733900

H -1.00350400 -4.27786900 2.51649200  
H 0.93287200 -2.28361100 3.79153700  
H 1.28679300 -3.91573200 3.15054200  
B -0.01579100 -1.95819000 1.06292200  
O -1.16375100 -2.36696700 1.74349500  
O 1.12009700 -2.40854900 1.73906100  
N -0.00309900 -1.30775700 -2.33849500  
C -0.00138000 -2.41343700 -1.85603800  
C -0.00424300 -3.85324600 -2.23197800  
H -0.00890900 -3.95496300 -3.33230400  
H 0.88733500 -4.35930800 -1.82253700  
H -0.89360000 -4.35732400 -1.81524100  
**<sup>1</sup>W<sub>Co</sub>**  
C -0.00045200 0.11474400 0.63409000  
C -1.22242700 -0.45504300 1.04688000  
C -1.26788600 -1.59025300 1.89437300  
C -0.02126800 -2.16927900 2.26806800  
C 1.23786400 -1.61303400 1.89399600  
C 1.21242400 -0.47992000 1.04621800  
H -2.19679100 -2.04612100 2.23256700  
H -0.02956200 -3.06268700 2.89583600  
H 2.15801100 -2.08619000 2.23235000  
C 3.65920200 0.11939200 0.56929600  
C 1.90157800 1.28810600 -0.33157600  
C 4.15794000 1.14273200 -0.25805900  
C 4.52498500 -0.74325400 1.23885900  
C 5.52324900 1.34045900 -0.43855200  
C 5.89354900 -0.54657800 1.05558900  
H 4.16294300 -1.54538500 1.88247200  
C 6.38656700 0.47644700 0.23372300  
H 5.90254000 2.13873700 -1.08050100  
H 6.59705300 -1.21006600 1.56637600  
H 7.46696900 0.59844400 0.11604000  
C -3.65909700 0.18756500 0.57061600  
C -1.88133500 1.32948500 -0.32453900  
C -4.13989600 1.22059400 -0.25538900  
C -4.54008500 -0.66397900 1.23474300  
C -5.50151300 1.43889900 -0.44014900  
C -5.90485000 -0.44666800 1.04721900  
H -4.19240400 -1.47376500 1.87674600  
C -6.37987000 0.58576000 0.22647100  
H -5.86668100 2.24399700 -1.08175200  
H -6.61980800 -1.10156200 1.55318400  
H -7.45793400 0.72353500 0.10486400

N -2.28093800 0.29174800 0.50600700  
N -3.02931600 1.87268300 -0.77578000  
N 2.28293200 0.24518700 0.50144700  
N 3.05918900 1.81056400 -0.78322700  
C 3.17233400 2.91965300 -1.69677300  
H 3.65405300 3.77681700 -1.19946500  
H 3.76407300 2.61932500 -2.57779700  
H 2.16412400 3.21162800 -2.01439100  
C -3.12187800 2.98520800 -1.68770400  
H -3.70027600 2.69100900 -2.57964800  
H -3.60780000 3.84291600 -1.19552100  
H -2.10696800 3.27452100 -1.98548700  
Co 0.01381300 1.53741200 -0.53509800  
H 0.03571300 2.95501400 -1.33224400  
C 0.82632000 5.23561000 1.05323600  
C -0.68007200 5.08412900 1.28564200  
H 1.39417900 5.36403000 1.99117400  
H 1.05445300 6.09723000 0.39463600  
H -0.89744200 4.71216600 2.30635500  
H -1.23722700 6.02578800 1.13928000  
B 0.04810200 3.39258900 -0.04385100  
O 1.20429400 4.03695400 0.41257100  
O -1.08366300 4.12626000 0.33335200  
W -0.02462800 -2.20133200 -0.08494000  
C 1.32802400 -2.17557400 -1.52666000  
O 2.15099200 -2.11170600 -2.33922900  
C -1.43465000 -2.23540200 -1.46758100  
O -2.29133400 -2.21075400 -2.24700000  
C 0.00923000 -4.17280700 -0.19565900  
O 0.02931500 -5.33164800 -0.22094900  
**<sup>1</sup>7**  
C 0.32395100 -2.00732200 -0.01725100  
C 1.61259100 -2.56669100 0.02216600  
C 1.81626200 -3.94494500 0.00306700  
C 0.69075800 -4.78110500 -0.05877600  
C -0.61353200 -4.26461000 -0.09953400  
C -0.77528200 -2.88077900 -0.07691000  
H 2.81411600 -4.38691700 0.03618300  
H 0.83407700 -5.86572600 -0.07531400  
H -1.46196800 -4.95009800 -0.14948800  
C -3.29995800 -2.43189600 -0.12505000  
C -1.73365000 -0.74831300 -0.09077300  
C -3.97224800 -1.18838300 -0.12477800  
C -4.02071400 -3.62442100 -0.13816700

|               |             |             |               |             |             |
|---------------|-------------|-------------|---------------|-------------|-------------|
| C -5.36245400 | -1.10971200 | -0.13240900 | H -2.88480400 | 4.79286200  | 0.51830500  |
| C -5.41731900 | -3.54364500 | -0.14930000 | H -2.44904200 | 6.34233800  | -0.25604100 |
| H -3.52377900 | -4.59487400 | -0.13781100 | H -2.53687200 | 4.85290600  | -1.23745800 |
| C -6.07805300 | -2.31080100 | -0.14631400 | B -0.57718400 | 2.83818200  | 1.25824800  |
| H -5.87724900 | -0.14570500 | -0.12332100 | O -0.28361000 | 1.49430100  | 1.38195200  |
| H -6.00189500 | -4.46829000 | -0.15841600 | O -0.97342100 | 3.39718600  | 2.44006800  |
| H -7.17175700 | -2.28356200 | -0.15231600 | C -0.66015700 | 1.08983100  | 2.69814700  |
| C 3.93363800  | -1.47581300 | 0.10511300  | C -0.80919600 | 2.41340500  | 3.45508400  |
| C 1.98194400  | -0.26036000 | 0.10351800  | H -1.60526600 | 0.52513600  | 2.63305700  |
| C 4.25686300  | -0.10017800 | 0.14600700  | H 0.11485000  | 0.42582200  | 3.10811700  |
| C 4.94163900  | -2.43788500 | 0.09379100  | H -1.68241300 | 2.42406400  | 4.12663400  |
| C 5.57763200  | 0.33981000  | 0.16997800  | H 0.09046000  | 2.65755200  | 4.04765300  |
| C 6.26819600  | -1.99443800 | 0.12130400  | H -0.15097500 | 5.48107200  | -0.73382300 |
| H 4.71681200  | -3.50436700 | 0.06295100  | <b>3</b>      |             |             |
| C 6.58285700  | -0.63196300 | 0.15816100  | C -0.12758200 | -1.55759700 | -0.06037300 |
| H 5.82099400  | 1.40504600  | 0.19333800  | C 1.03532500  | -2.31088300 | -0.15817600 |
| H 7.07467100  | -2.73353600 | 0.11180000  | C 0.99988800  | -3.68810100 | -0.38379800 |
| H 7.63120800  | -0.31956700 | 0.17609100  | C -0.25570900 | -4.29485800 | -0.51050600 |
| N 2.55393100  | -1.53147600 | 0.08126400  | C -1.44876000 | -3.56792000 | -0.41722700 |
| N 3.06281800  | 0.59246500  | 0.15395800  | C -1.35560000 | -2.19385200 | -0.18966600 |
| N -1.95370500 | -2.12512400 | -0.10634000 | H 1.90081000  | -4.29859600 | -0.45845700 |
| N -3.00110900 | -0.20726800 | -0.11505300 | H -0.30622200 | -5.37327100 | -0.68747800 |
| C -3.28960300 | 1.19779800  | -0.11589500 | H -2.40304100 | -4.08582800 | -0.52261300 |
| H -2.37847700 | 1.74322900  | -0.38819500 | C -3.78152000 | -1.33475600 | -0.15749600 |
| H -4.07007400 | 1.43014800  | -0.86083800 | C -1.99663700 | 0.05225900  | 0.15215200  |
| H -3.63753900 | 1.54766900  | 0.87436200  | C -4.24814000 | -0.01634800 | 0.00806100  |
| C 2.97506300  | 2.02374600  | 0.19964800  | C -4.68084000 | -2.38363000 | -0.36034500 |
| H 3.24360100  | 2.48264500  | -0.77049200 | C -5.60422800 | 0.29762400  | -0.02358800 |
| H 1.94721600  | 2.30548200  | 0.45762500  | C -6.03814400 | -2.06940600 | -0.39152400 |
| H 3.65237500  | 2.42565500  | 0.97306000  | H -4.34997100 | -3.41420200 | -0.48919000 |
| Co 0.08125400 | -0.17026500 | 0.00839100  | C -6.49583400 | -0.75321200 | -0.22658300 |
| H -0.49680300 | 5.41623500  | 1.00571100  | H -5.95338300 | 1.32446500  | 0.10734000  |
| C 0.49377900  | 1.30325800  | -2.64529100 | H -6.76381900 | -2.87275000 | -0.54784800 |
| C 0.21057100  | 2.61141500  | -3.39077700 | H -7.56989200 | -0.54914500 | -0.25658400 |
| H 1.57031700  | 1.07108100  | -2.58376000 | C 3.53082500  | -1.70041200 | -0.01831700 |
| H -0.02809100 | 0.42961600  | -3.06230800 | C 1.88272000  | -0.14996900 | 0.27497400  |
| H 1.03319500  | 2.90635200  | -4.06146300 | C 4.11985600  | -0.44813400 | 0.24216200  |
| H -0.72108600 | 2.55947700  | -3.98183400 | C 4.32771800  | -2.82386700 | -0.24740200 |
| B -0.13764600 | 2.92173800  | -1.19010100 | C 5.50074100  | -0.27492700 | 0.28437000  |
| O 0.00817200  | 1.55554900  | -1.32653000 | C 5.70982700  | -2.65072100 | -0.20466300 |
| O 0.05280800  | 3.58763700  | -2.36757300 | H 3.90110800  | -3.80458700 | -0.45695300 |
| N -0.46198000 | 3.55868300  | 0.03860700  | C 6.28995300  | -1.40010300 | 0.05686200  |
| C -0.77565800 | 4.98973400  | 0.02907700  | H 5.94607100  | 0.70248000  | 0.48425200  |
| C -2.24405400 | 5.25717400  | -0.25211900 | H 6.35712400  | -3.51442200 | -0.38191400 |

H 7.37936700 -1.30649300 0.08036500  
 N 2.16724400 -1.47364400 0.01563000  
 N 3.08033300 0.45241900 0.41895800  
 N -2.40447800 -1.24659700 -0.06556600  
 N -3.12949900 0.78301000 0.18837900  
 C -3.19075200 2.21391500 0.36724600  
 H -3.73254600 2.67270000 -0.47696200  
 H -3.70919000 2.46235100 1.30849500  
 H -2.15924000 2.59062600 0.39909000  
 C 3.28424100 1.85009100 0.71417100  
 H 3.95282800 1.95387100 1.58488500  
 H 3.73586000 2.36283600 -0.15216000  
 H 2.30669100 2.29620100 0.94015700  
 Co -0.04273500 0.29434100 0.29461800  
 H -0.23305900 3.78046500 2.14349400  
 C 0.76409900 4.86426400 -1.66653700  
 C 1.15889900 3.59008400 -2.42773800  
 H -0.17057000 5.30293600 -2.07022200  
 H 1.54570400 5.64369300 -1.70348400  
 H 0.73216500 3.55004200 -3.44545500  
 H 2.26006400 3.49747500 -2.51976100  
 B 0.39102400 3.05255000 -0.36389200  
 O 0.55782600 4.43786700 -0.34060100  
 O 0.65450300 2.53949000 -1.63964700  
 N 0.04670600 2.22952700 0.70899900  
 C -0.18744600 2.69481200 1.97629800  
 C -0.69252900 1.77424600 3.03022600  
 H -0.55002900 2.19789800 4.04139300  
 H -1.77864400 1.53007400 2.94263000  
 H -0.16246900 0.79776200 3.00343600  
**<sup>13</sup>K<sub>Dipp</sub>**  
 C -1.11203600 0.25202400 -1.96267000  
 C -0.69054700 1.39331400 -2.64701700  
 C -0.62032200 1.41745700 -4.03975200  
 C -0.99004600 0.25790500 -4.73691100  
 C -1.42073200 -0.90369000 -4.08224300  
 C -1.47490900 -0.88322000 -2.68881500  
 H -0.30420600 2.29895700 -4.59913400  
 H -0.94678400 0.26310000 -5.82997200  
 H -1.69595800 -1.78193700 -4.66714600  
 C -2.39001900 -3.16114200 -1.96710800  
 C -1.78941300 -1.54963500 -0.45514000  
 C -2.61007500 -3.65226600 -0.66985100  
 C -2.69507200 -3.94200900 -3.08293300  
 C -3.11611000 -4.92731000 -0.43749300  
 C -3.21389500 -5.21548400 -2.85326900  
 H -2.54726900 -3.58264300 -4.10144100  
 C -3.41804600 -5.70399800 -1.55421500  
 H -3.26404200 -5.29713900 0.57931000  
 H -3.46814200 -5.84655900 -3.70960000  
 H -3.82315600 -6.71023300 -1.41518500  
 C -0.00965100 3.72690500 -1.83684900  
 C -0.64408300 2.06691100 -0.39476400  
 C 0.02757600 4.22836800 -0.52361300  
 C 0.34016400 4.54201200 -2.91456700  
 C 0.40781500 5.53605900 -0.23970900  
 C 0.72316900 5.85331500 -2.63311800  
 H 0.31373300 4.18579500 -3.94431700  
 C 0.75721200 6.34486800 -1.31987200  
 H 0.42187100 5.90666400 0.78780000  
 H 0.99652800 6.51446100 -3.46040200  
 H 1.05620800 7.38140800 -1.14054800  
 N -0.41362900 2.40911100 -1.71508400  
 N -0.35963600 3.18799000 0.31453200  
 N -1.86497200 -1.89289900 -1.79287900  
 N -2.21623300 -2.64879600 0.21311300  
 Co -1.26185500 0.27341900 -0.09876700  
 H -2.31766400 0.52275800 3.24510600  
 C -5.11907400 0.67315600 -1.53061700  
 C -4.50588900 2.00821200 -1.98508100  
 H -5.82624700 0.85294600 -0.69693900  
 H -4.23964900 1.93743100 -3.05907100  
 B -2.94660300 0.81756200 -0.83008900  
 O -4.00928900 -0.05071800 -1.01228400  
 O -3.29070300 2.09381300 -1.24872900  
 N -1.06075800 0.18194200 1.65988500  
 C -1.30232600 0.23176500 2.88708400  
 C -0.34246800 -0.06450800 4.00588200  
 H 0.66178500 -0.29662700 3.62153500  
 H -0.27521100 0.80315700 4.68654000  
 H -0.70765800 -0.92157100 4.60045600  
 K 3.63593600 -0.89524700 -0.15448800  
 O 3.02144900 0.94249100 -2.10075300  
 O 5.74383100 -0.15976500 1.55024300  
 O 2.70770800 -1.87070100 -2.52349000  
 C 3.80255800 2.11139500 -2.03386200  
 C 2.86139600 0.40791600 -3.39407300  
 C 6.17727700 -1.06835200 2.52862700



|                                      |                                      |
|--------------------------------------|--------------------------------------|
| C 6.76215900 0.68723900 1.08463300   | H -0.46946400 3.88025200 5.55757000  |
| C 3.71258800 -2.60557600 -3.17164000 | C -2.29582300 -2.83053000 1.62846800 |
| C 2.07210900 -0.87584300 -3.29524100 | C -3.54750700 -2.69560500 2.24655300 |
| C 5.28974100 1.81685100 -2.08664000  | C -1.13554300 -3.21779200 2.32925700 |
| H 3.54148400 2.60231500 -1.08030900  | C -3.63093800 -2.98481600 3.61416000 |
| H 3.53070300 2.81231600 -2.84804900  | C -1.27614600 -3.50389000 3.68885300 |
| H 2.30037300 1.11580300 -4.03530000  | C -2.51183800 -3.39670500 4.32514900 |
| H 3.84324100 0.22754000 -3.87496900  | H -4.59159000 -2.88329500 4.12753100 |
| C 5.07707200 -2.07499200 2.78656800  | H -0.40397600 -3.80607200 4.27229200 |
| H 7.10596100 -1.57207200 2.19335700  | H -2.59561100 -3.62630700 5.39184600 |
| H 6.41476000 -0.54677600 3.47856000  | C 2.10353100 2.84677400 1.78642400   |
| C 6.20401700 1.67062900 0.09275300   | C 2.54188700 1.43069800 2.16283600   |
| H 7.56332800 0.09006800 0.60364800   | C 3.19134500 3.87520000 2.09414800   |
| H 7.21511200 1.25369000 1.92329600   | H 1.94074300 2.85590300 0.69643600   |
| C 4.09385100 -3.77066500 -2.29653300 | H 1.79072700 0.69630600 1.82246300   |
| H 3.34511800 -2.99601200 -4.14172700 | H 3.52922400 1.19869200 1.72528300   |
| H 4.60827100 -1.98265900 -3.37403700 | H 2.64665300 1.32049100 3.25693800   |
| H 1.11188500 -0.67009200 -2.79924400 | H 2.86770000 4.89525800 1.82473800   |
| H 1.85838600 -1.25306000 -4.31313200 | H 3.46478700 3.87821400 3.16395500   |
| O 5.70667000 0.98421900 -1.02693900  | H 4.10978400 3.65111200 1.52216000   |
| H 5.54750300 1.29232500 -3.02245300  | C 0.21611300 -3.29361700 1.63718400  |
| H 5.85393600 2.76931100 -2.08378600  | C 0.36555000 -4.54949700 0.77457000  |
| O 4.64220000 -2.72981500 1.62073700  | C 1.39355300 -3.20316700 2.60272900  |
| H 5.42002300 -2.80400500 3.54745800  | H 0.26834100 -2.41070900 0.97492900  |
| H 4.18955800 -1.55896000 3.19068600  | H -0.41306000 -4.63041300 0.00070200 |
| H 5.41497100 2.28235100 0.57428800   | H 1.34486300 -4.54192800 0.26141200  |
| H 7.02237000 2.35593900 -0.20599900  | H 0.31591700 -5.46019400 1.39858900  |
| O 4.64561400 -3.28845300 -1.09780400 | H 1.31826000 -2.32141100 3.25989400  |
| H 3.19194200 -4.38052200 -2.08789800 | H 1.46741300 -4.10017800 3.24366100  |
| H 4.82433000 -4.40891200 -2.83396700 | H 2.34168000 -3.13689000 2.04229500  |
| C 5.53405500 -3.66509900 1.06725600  | C -4.77555500 -2.22708200 1.49126900 |
| C 4.89187600 -4.28819500 -0.14377700 | C -5.26260900 -0.88593600 2.03771800 |
| H 6.48388500 -3.18371000 0.76417600  | C -5.88993900 -3.27286900 1.50345000 |
| H 5.76974600 -4.46043800 1.80246200  | H -4.48564300 -2.04921900 0.44520300 |
| H 5.57544300 -5.06091700 -0.55032500 | H -4.46571300 -0.12834800 1.97603000 |
| H 3.94514900 -4.78955200 0.14331400  | H -6.12364400 -0.52247500 1.44909900 |
| C -0.40654300 3.33718300 1.73409800  | H -5.58640100 -0.96488000 3.09141600 |
| C 0.79083400 3.20171700 2.45712600   | H -5.54835600 -4.23526400 1.08515800 |
| C -1.62221400 3.67904500 2.34637400  | H -6.26592900 -3.46107100 2.52553800 |
| C 0.74390900 3.40105700 3.83937500   | H -6.74413800 -2.92700400 0.89414000 |
| C -1.61935700 3.86346000 3.73316100  | C -2.90980900 3.82612500 1.56406000  |
| C -0.45042900 3.72807800 4.47410600  | C -3.52800100 5.21241700 1.73737300  |
| H 1.65749100 3.29571700 4.43192700   | C -3.88420300 2.71307800 1.94385900  |
| H -2.55302800 4.12238600 4.24103800  | H -2.68328300 3.69046800 0.49623900  |

H -2.81932000 6.00913600 1.44973500  
H -4.42360000 5.31195600 1.09841300  
H -3.84151500 5.39868500 2.78032200  
H -3.43753500 1.73258800 1.71578900  
H -4.14176200 2.74138300 3.01822200  
H -4.82233900 2.80339900 1.37044600  
C -5.37099300 3.22524900 -1.76626800  
H -4.82831300 4.14067900 -2.05737800  
H -6.28843200 3.16327400 -2.37757200  
H -5.66468900 3.31716400 -0.70666100  
C -5.80625100 -0.11711000 -2.61812000  
H -6.66540300 0.44358700 -3.02691700  
H -5.10245000 -0.33362800 -3.44097200  
H -6.18058600 -1.07644200 -2.22139100

### **<sup>1</sup>TS3**

C -0.24815500 0.39996200 -1.07390400  
C 0.94506100 0.56440000 -1.76255800  
C 0.98092700 1.20630200 -3.00032800  
C -0.22777300 1.68114800 -3.52628400  
C -1.44682400 1.53322300 -2.85187900  
C -1.43010900 0.88450400 -1.61630200  
H 1.90640200 1.35376500 -3.55955300  
H -0.21895600 2.18687600 -4.49639200  
H -2.36283300 1.92601300 -3.29675800  
C -3.87014900 0.72678100 -0.81618600  
C -2.12017100 -0.04048200 0.42471300  
C -4.36883000 0.13142200 0.35887100  
C -4.73758900 1.27623500 -1.75929900  
C -5.73270800 0.06736300 0.62716800  
C -6.10471900 1.21219100 -1.49020600  
H -4.37248500 1.74099200 -2.67558500  
C -6.59643300 0.61920900 -0.31868500  
H -6.11176800 -0.39448400 1.54190300  
H -6.80806200 1.63645500 -2.21257300  
H -7.67548500 0.58946400 -0.14218700  
C 3.33381400 -0.23549400 -1.26457500  
C 1.60612900 -0.56687300 0.18519200  
C 3.79366400 -0.99650900 -0.17235700  
C 4.20105200 0.11830000 -2.29792700  
C 5.11264100 -1.42991100 -0.08048300  
C 5.52492600 -0.31121000 -2.20355300  
H 3.86907200 0.70862900 -3.15230700  
C 5.97575500 -1.07305700 -1.11617700  
H 5.45776900 -2.02378900 0.76927900

H 6.22641800 -0.04585600 -2.99977700  
H 7.02124600 -1.39230100 -1.07842400  
N 1.99371700 -0.00886300 -1.01352600  
N 2.71049100 -1.17882000 0.67388000  
N -2.49516500 0.59936200 -0.73460700  
N -3.27057700 -0.32107900 1.07524400  
C -3.37480700 -1.09110000 2.28664900  
H -3.73941100 -0.46782300 3.12135200  
H -4.06797400 -1.93453100 2.13185000  
H -2.38311800 -1.49434300 2.52681500  
C 2.74122100 -2.06499100 1.80765000  
H 3.06783500 -3.06732000 1.48340100  
H 3.42853100 -1.69142600 2.58533900  
H 1.72549400 -2.14088900 2.21344900  
Co -0.23739600 -0.31765500 0.65000300  
H -1.16670200 0.35905700 3.01814300  
C 2.77619200 3.70502900 2.05078600  
C 2.48458400 3.77932900 0.54418200  
H 2.79607500 4.69805400 2.53285300  
H 3.74460100 3.20778600 2.25572400  
H 2.00081100 4.73601200 0.26672400  
H 3.39317800 3.66651400 -0.07275100  
B 1.09778700 2.28193100 1.51600100  
O 1.72589100 2.92527000 2.57841700  
O 1.59777100 2.71333800 0.30042000  
N 0.03776300 1.37520600 1.66686300  
C -0.14624300 0.42879700 2.60215200  
C 0.91045000 0.11766400 3.63385200  
H 0.91539900 0.93084300 4.38253600  
H 0.71155000 -0.83211100 4.15967500  
H 1.91483000 0.08478600 3.18624800  
B -0.53295800 -2.15168100 0.12962800  
O -1.77936200 -2.75555200 -0.00078000  
O 0.46395400 -3.07141900 -0.17924200  
C -1.61793300 -4.04129400 -0.56631200  
C -0.12181400 -4.33584000 -0.41989400  
H -2.25524700 -4.77059000 -0.03709400  
H -1.93310900 -4.01715000 -1.62644200  
H 0.08718900 -5.00586600 0.43633700  
H 0.31832600 -4.79041900 -1.32376800  
H -0.25661200 -1.17525700 1.91244500

### **<sup>3</sup>TS2**

C 0.04909100 -1.52520700 -0.05865700  
C -1.14430700 -2.21232800 0.14977800

C -1.15729900 -3.56241200 0.50132700  
C 0.07655000 -4.20391500 0.67280200  
C 1.29573300 -3.52640300 0.54094100  
C 1.25440500 -2.17736400 0.18665800  
H -2.08147800 -4.11842600 0.66824300  
H 0.08751900 -5.26218700 0.95026000  
H 2.23004700 -4.05366300 0.74204100  
C 3.69251500 -1.41100000 -0.00723100  
C 1.94428300 0.06272400 -0.04215900  
C 4.19321100 -0.11009700 -0.20276100  
C 4.55232400 -2.50851800 0.02838000  
C 5.55519400 0.13495700 -0.35775900  
C 5.91648700 -2.26226100 -0.12561500  
H 4.18389200 -3.52605500 0.16007500  
C 6.41206900 -0.96406200 -0.31233000  
H 5.93745900 1.14592800 -0.51568800  
H 6.61357600 -3.10491100 -0.10363700  
H 7.48851100 -0.81027200 -0.43066700  
C -3.60030800 -1.50782500 -0.08762300  
C -1.88299900 0.00021900 -0.15565000  
C -4.12454600 -0.22480400 -0.33292700  
C -4.44158100 -2.61742800 -0.01205000  
C -5.48976200 -0.00742800 -0.49604200  
C -5.80979600 -2.40007200 -0.17663400  
H -4.05791600 -3.62289500 0.16204000  
C -6.32793300 -1.11873200 -0.41117700  
H -5.88800500 0.99248600 -0.68313500  
H -6.49241100 -3.25300500 -0.12179200  
H -7.40708800 -0.98795900 -0.53243500  
N -2.23285200 -1.32750300 0.00881400  
N -3.05019000 0.65026000 -0.37325700  
N 2.32162900 -1.26151100 0.08623600  
N 3.10187300 0.74547600 -0.20967900  
C 3.22600200 2.16871200 -0.40523800  
H 4.08721500 2.54054600 0.17373900  
H 3.38035800 2.40037200 -1.47342600  
H 2.31661700 2.65357100 -0.03376400  
C -3.21000200 2.05708200 -0.63745600  
H -3.71248300 2.19715700 -1.60999300  
H -3.80967400 2.52941400 0.15776600  
H -2.22015900 2.52033400 -0.66689500  
Co 0.02081100 0.38042300 -0.13556000  
H 0.21660700 3.88836700 -0.98141700  
C 0.35479200 3.75386000 2.42251800

C -1.16486700 3.61047400 2.31034700  
H 0.72087100 3.50812200 3.43686300  
H 0.71528100 4.76346800 2.16213500  
H -1.67266900 3.61763200 3.28956500  
H -1.61357200 4.40671400 1.68573600  
B -0.15246600 1.93751000 1.12825900  
O 0.86496300 2.80605500 1.49970100  
O -1.35362300 2.35578100 1.67816700  
N 0.04781700 1.84605100 -1.26598800  
C 0.14818000 3.02092600 -1.68597000  
C 0.20203100 3.40135100 -3.14196600  
H -0.62872600 4.08617300 -3.39807400  
H 1.14223800 3.93997700 -3.36735800  
H 0.13895900 2.50335600 -3.77822400  
**<sup>13</sup>K<sub>Dipp</sub>**  
C 0.94893100 -0.11003300 -1.39709700  
C 1.39774200 -1.37009800 -1.78951100  
C 2.51355200 -1.53472700 -2.61451200  
C 3.17104400 -0.38011500 -3.06514700  
C 2.73278900 0.90683000 -2.72000400  
C 1.62428800 1.01294100 -1.87790500  
H 2.86791400 -2.51474300 -2.93825500  
H 4.04531700 -0.48798700 -3.71252900  
H 3.24230600 1.78141500 -3.12691600  
C 1.33203500 3.51536900 -1.35729800  
C -0.23815000 1.94991000 -0.79938500  
C 0.29399300 4.14791900 -0.64860300  
C 2.45103900 4.23525900 -1.77854100  
C 0.34427100 5.49958400 -0.32172900  
C 2.49360600 5.59296100 -1.46581600  
H 3.27444800 3.75975300 -2.31072300  
C 1.46136500 6.21594900 -0.74741600  
H -0.45743900 5.96964700 0.25130300  
H 3.35650000 6.18486400 -1.78451900  
H 1.53492400 7.28205400 -0.51518200  
C 0.54198700 -3.73830400 -1.30285500  
C -0.64412600 -1.86708800 -0.72151200  
C -0.66860200 -4.13706500 -0.71409400  
C 1.48537500 -4.68468300 -1.70672600  
C -0.98936500 -5.47911200 -0.52588700  
C 1.16803200 -6.02755100 -1.51592000  
H 2.43880700 -4.39442900 -2.14765600  
C -0.05016900 -6.42091400 -0.93867900  
H -1.93607800 -5.77289700 -0.06768800

|                                       |                                       |
|---------------------------------------|---------------------------------------|
| H 1.88484800 -6.79302100 -1.82638500  | H -5.87525400 -3.55423100 -0.96394700 |
| H -0.26497700 -7.48525600 -0.80885200 | H -4.42100600 -3.18156500 3.05362600  |
| N 0.51182400 -2.35568700 -1.29865000  | H -6.28775100 -3.54952700 1.47796900  |
| N -1.36014100 -2.97186300 -0.38081900 | C -2.97076300 4.45721000 -1.59629800  |
| N 0.96779900 2.18102300 -1.42474400   | C -3.03389000 5.96998100 -1.80941600  |
| N -0.64664700 3.16246700 -0.35032000  | C -4.15374300 3.76225100 -2.27434000  |
| Co -0.76151000 0.08263600 -0.65993500 | H -2.04836900 4.09191500 -2.07576300  |
| C -5.41845000 0.85094300 1.29057600   | H -2.16793400 6.48616200 -1.36162800  |
| C -6.13706900 0.40014200 0.00392600   | H -3.04415800 6.20445700 -2.88873600  |
| H -5.51795400 1.95102400 1.38400600   | H -3.95047800 6.39966600 -1.36685100  |
| H -6.48479800 -0.64648700 0.12935600  | H -4.16169100 2.67944000 -2.07073500  |
| B -3.88941100 0.40929900 -0.32037200  | H -5.11445000 4.17733300 -1.91999400  |
| O -4.05769200 0.54803900 1.05743500   | H -4.11192900 3.91162000 -3.36794700  |
| O -5.12141200 0.41708000 -0.98077400  | C -3.54162200 -3.27796700 -2.28944100 |
| N -2.66982500 0.29968700 -0.94656500  | C -4.49280600 -2.33274000 -3.02718400 |
| C -2.05249800 0.07414300 -2.12063700  | C -3.68022800 -4.70456000 -2.82628900 |
| C -1.95253300 1.10215400 -3.21506100  | H -2.51204400 -2.94580500 -2.49649700 |
| H -1.83991700 2.12140700 -2.81767400  | H -4.52765200 -1.33430600 -2.56143200 |
| H -1.10266600 0.88080600 -3.88515900  | H -4.17627800 -2.22312400 -4.07965700 |
| H -2.87404000 1.07833800 -3.83126100  | H -5.52363700 -2.73039400 -3.03821300 |
| H -2.09740700 -0.94738100 -2.54110100 | H -2.95150800 -5.39211000 -2.36561700 |
| C -5.91818200 0.20373400 2.56036200   | H -4.69322400 -5.10205900 -2.63431000 |
| H -5.34434600 0.56686200 3.43070300   | H -3.51469700 -4.71986000 -3.91846500 |
| H -6.98246400 0.44597200 2.73009400   | C -0.60075300 2.27870900 2.36280400   |
| H -5.80915000 -0.89245900 2.50466500  | C -0.82083000 0.77091800 2.21772700   |
| C -7.30190100 1.27227600 -0.40235400  | C -0.28631500 2.64468700 3.81051400   |
| H -7.74201500 0.91614200 -1.34947200  | H 0.28254500 2.54660600 1.75702500    |
| H -8.09212200 1.25793300 0.36923200   | H -1.27148600 0.51944300 1.23076900   |
| H -6.97017600 2.31560000 -0.54751600  | H 0.12102200 0.21350300 2.35610800    |
| C -1.81077000 3.41899600 0.44314800   | H -1.56151600 0.41753200 2.95122000   |
| C -1.78124700 3.04197200 1.79803500   | H -0.12256400 3.73012100 3.92858000   |
| C -2.90546000 4.08928400 -0.12763600  | H -1.09696700 2.34702000 4.49741700   |
| C -2.89001700 3.35320100 2.58651000   | H 0.62419800 2.12371900 4.15149400    |
| C -3.98464000 4.39442900 0.70844800   | C -1.77745500 -2.80712100 2.50349100  |
| C -3.97784000 4.03558400 2.05082400   | C -1.10921400 -4.14348200 2.84054000  |
| H -2.90711500 3.06288700 3.63947200   | C -2.21587000 -2.10877300 3.78945400  |
| H -4.85098300 4.91704900 0.29287900   | H -1.03106300 -2.16012500 2.01079100  |
| H -4.83377100 4.28136500 2.68647300   | H -0.68838600 -4.63641200 1.94987100  |
| C -2.70199500 -3.02996100 0.12836500  | H -0.29174400 -3.99911800 3.57019600  |
| C -3.75175200 -3.22890900 -0.78807400 | H -1.84152500 -4.83588200 3.29317500  |
| C -2.91581900 -3.00186600 1.51951000  | H -2.83697900 -1.22246500 3.58024300  |
| C -5.04034100 -3.40606400 -0.27384200 | H -2.79370200 -2.78421200 4.44469500  |
| C -4.22039800 -3.19584900 1.98034800  | H -1.33166000 -1.78283200 4.36537300  |
| C -5.27352300 -3.40155300 1.09508800  | K 3.84812200 -0.26259900 0.24845800   |

O 4.82386600 2.33127400 -0.14372800  
O 2.53006600 -0.77408500 2.62043300  
O 6.12655600 0.08861900 -1.32710800  
C 4.52569600 3.17147600 0.94707700  
C 6.14082500 2.42902100 -0.62420100  
C 2.26354000 -2.10704600 2.97423000  
C 2.79499600 0.05756800 3.71909100  
C 7.19450800 -0.53714000 -0.66362200  
C 6.33508000 1.41712800 -1.73149900  
C 5.00680800 2.59555100 2.26592700  
H 3.42916000 3.29282200 0.95278600  
H 4.96249100 4.17890200 0.79864100  
H 6.32934800 3.44258700 -1.03441700  
H 6.87855000 2.26212500 0.18580000  
C 2.03612200 -2.91204900 1.71403300  
H 3.10704100 -2.51476500 3.56742700  
H 1.35542900 -2.16971000 3.60846100  
C 3.18462500 1.42884900 3.23599800  
H 3.62128600 -0.36192400 4.32764300  
H 1.90039100 0.14040500 4.36863400  
C 6.90919400 -2.01458000 -0.59360200  
H 8.14184900 -0.38481800 -1.21845800  
H 7.33239600 -0.13331100 0.36033500  
H 5.59991600 1.60967600 -2.52946000  
H 7.34844800 1.54217200 -2.16244400  
O 4.41720400 1.35153200 2.56518000  
H 6.09600500 2.42246500 2.23746700  
H 4.81355900 3.32459400 3.07748900  
O 3.12545000 -2.86689400 0.82579900  
H 1.79248600 -3.95694100 1.98294600  
H 1.17587000 -2.49380200 1.16927300  
H 2.38936900 1.83620500 2.57872300  
H 3.26695900 2.09776800 4.11574900  
O 5.78497500 -2.23954500 0.21720100  
H 6.72628100 -2.39259700 -1.61935200  
H 7.79612800 -2.54107500 -0.18575600  
C 4.18292000 -3.73466900 1.14298000  
C 5.29479600 -3.55328100 0.14474200  
H 4.57460600 -3.53639900 2.16021400  
H 3.84116600 -4.78878900 1.10740200  
H 6.09556800 -4.28467000 0.37573800  
H 4.92535500 -3.76748800 -0.87900000  
**<sup>13</sup>W<sub>Co</sub>**  
C -0.00143200 -0.09848400 -0.66235300

C 1.21714800 -0.70972700 -1.04314300  
C 1.26409800 -1.88245100 -1.83208200  
C 0.01744500 -2.48275600 -2.17811300  
C -1.23390800 -1.91057400 -1.82355500  
C -1.20558100 -0.72914800 -1.03683600  
H 2.19340600 -2.35106200 -2.15031400  
H 0.02525300 -3.40632100 -2.76043000  
H -2.15633500 -2.39908300 -2.13194100  
C -3.65488800 -0.11120800 -0.63230700  
C -1.91037700 1.13582200 0.19308300  
C -4.17255900 0.97696400 0.09508400  
C -4.50399400 -1.03570800 -1.23869000  
C -5.54358600 1.18138400 0.22455100  
C -5.87680300 -0.83248600 -1.10340700  
H -4.12545700 -1.89192600 -1.79714400  
C -6.38975900 0.25744700 -0.38705100  
H -5.94473000 2.03149700 0.78095000  
H -6.56647700 -1.54332200 -1.56720400  
H -7.47266200 0.38619600 -0.30443300  
C 3.65365900 -0.04864600 -0.64173400  
C 1.88905300 1.16940500 0.18561600  
C 4.15356500 1.04921200 0.08300400  
C 4.51706000 -0.95961800 -1.24818400  
C 5.52116200 1.27708500 0.20989600  
C 5.88648900 -0.73288500 -1.11569300  
H 4.15199300 -1.82334800 -1.80401500  
C 6.38180100 0.36680700 -0.40195300  
H 5.90891900 2.13465000 0.76429400  
H 6.58740700 -1.43254300 -1.57960500  
H 7.46248800 0.51423900 -0.32149000  
N 2.27819800 0.06609700 -0.56060700  
N 3.05309600 1.73996500 0.57369400  
N -2.28182700 0.02700400 -0.55316700  
N -3.08318900 1.68577500 0.58463100  
C -3.20587300 2.88881200 1.36835800  
H -3.18935600 3.77912000 0.71838500  
H -4.14793100 2.85973200 1.93637600  
H -2.37077400 2.93923900 2.07664500  
C 3.15703400 2.94292000 1.36050000  
H 4.10323400 2.93039500 1.92208700  
H 3.11966200 3.83531200 0.71419400  
H 2.32603600 2.97455000 2.07466100  
Co -0.01265200 1.43228000 0.36798600  
H -0.04984200 5.19879800 1.58279700

C -0.82804500 3.88869000 -2.55289900  
C 0.67453800 4.20253900 -2.50576400  
H -1.02315900 2.93704700 -3.08453700  
H -1.42137400 4.68334700 -3.03636000  
H 1.23660700 3.69878300 -3.31133500  
H 0.87132100 5.28989800 -2.57777000  
B -0.04103900 3.40614400 -0.51167300  
O -1.20278600 3.75986300 -1.19831300  
O 1.10080300 3.73274200 -1.24386800  
N -0.02584500 3.24230600 0.95195900  
C -0.03317800 4.12810300 1.86043900  
C -0.02170200 3.81582800 3.31766100  
H 0.85701300 4.27515600 3.80934600  
H -0.91119700 4.24604200 3.81629300  
H -0.00368800 2.72613900 3.48450200  
W 0.02670000 -2.40457900 0.18400700  
C 1.31855600 -2.19639000 1.65856800  
O 2.10653400 -2.02026800 2.49140300  
C -1.41435800 -2.47198900 1.52818600  
O -2.29222300 -2.46643900 2.28633600  
C 0.21365700 -4.35594400 0.38545400  
O 0.32670600 -5.50865400 0.46154700

### PhH

C -0.96030800 -1.01266900 -0.00000100  
C 0.39697800 -1.33784000 0.00011300  
C 1.35718000 -0.32528100 -0.00008500  
C 0.96023000 1.01273800 0.00001800  
C -0.39687400 1.33786700 0.00008000  
C -1.35720700 0.32518700 -0.00008300  
H -1.71322300 -1.80674100 -0.00007100  
H 0.70802900 -2.38701800 0.00005700  
H 2.42131000 -0.58031700 -0.00019400  
H 1.71334100 1.80661300 -0.00001300  
H -0.70816600 2.38696400 0.00004300  
H -2.42128300 0.58048700 -0.00007700

### <sup>33</sup>

C 0.02230300 1.49052600 -0.05372800  
C 1.22679600 2.14440700 0.17572400  
C 1.26236700 3.49855000 0.51254000  
C 0.03715000 4.16717700 0.64451900  
C -1.19591100 3.51658500 0.49600200  
C -1.17558500 2.16190900 0.16027000  
H 2.19384400 4.03702600 0.69931300  
H 0.04313100 5.22933000 0.90717500

H -2.12167800 4.06906700 0.66952700  
C -3.62826000 1.39068700 -0.02751900  
C -1.88184200 -0.07342900 -0.06322200  
C -4.12684800 0.08588900 -0.21600800  
C -4.49333900 2.48325200 0.01476300  
C -5.48803900 -0.16725100 -0.35630700  
C -5.85760000 2.22918000 -0.12610800  
H -4.12740000 3.50219800 0.14495300  
C -6.34936200 0.92828400 -0.30558500  
H -5.86502100 -1.18195900 -0.50464800  
H -6.55896000 3.06808100 -0.09808500  
H -7.42632100 0.76981200 -0.41213000  
C 3.66932000 1.34134400 0.00599700  
C 1.90549100 -0.10217400 -0.02739200  
C 4.15293000 0.02949700 -0.17189100  
C 4.54656900 2.42448900 0.04125400  
C 5.51147200 -0.23994700 -0.30830700  
C 5.90799200 2.15392800 -0.09553700  
H 4.19147600 3.44843500 0.16205600  
C 6.38508400 0.84609000 -0.26433200  
H 5.87734200 -1.25965800 -0.44994500  
H 6.61879000 2.98503600 -0.07346700  
H 7.46027400 0.67464200 -0.36865500  
N 2.29408100 1.21745300 0.08902000  
N 3.04654400 -0.80705500 -0.18132000  
N -2.25465100 1.25000700 0.05890300  
N -3.03048600 -0.76347400 -0.22892100  
C -3.10989900 -2.19107700 -0.40403800  
H -3.79519900 -2.62677500 0.34304400  
H -3.47287600 -2.43612700 -1.41670900  
H -2.10235900 -2.60947600 -0.27075800  
C 3.10976000 -2.23645000 -0.35057300  
H 3.41653700 -2.49090600 -1.37945800  
H 3.83402000 -2.66754200 0.36128300  
H 2.11076600 -2.65178600 -0.15621500  
Co 0.00826400 -0.42309500 -0.13934300  
H 0.01668100 -3.44063700 -1.81048600  
C -0.07117100 -3.06158800 3.16401800  
C -0.22558000 -4.06074600 2.01330500  
H 0.91199300 -3.14878200 3.66325300  
H -0.85512400 -3.16526200 3.93322700  
H 0.50398100 -4.88697700 2.05545900  
H -1.24000600 -4.50046500 1.97718800  
B -0.05726100 -1.94045900 1.17669400

O -0.16965900 -1.78817300 2.54409400  
O -0.01190900 -3.28749900 0.84090600  
N 0.02101200 -1.38505900 -1.72366900  
C 0.02581800 -2.46444400 -2.35541100  
C 0.04385800 -2.57974300 -3.85863100  
H 0.93483700 -3.14246100 -4.19696400  
H -0.84208900 -3.13682800 -4.21882000  
H 0.05274000 -1.57952900 -4.32226600  
**<sup>16</sup>W<sub>PMe</sub>**  
C 0.24755100 -0.01859800 -0.98337300  
C -0.64084200 1.01055200 -1.38498400  
C -1.80477200 0.73905900 -2.14887800  
C -2.12433900 -0.64492500 -2.36235600  
C -1.27993600 -1.72065700 -1.94312700  
C -0.10355400 -1.36296200 -1.22400300  
H -2.46071800 1.51670100 -2.53724700  
H -3.02674400 -0.89290000 -2.92785200  
H -1.56301500 -2.75021000 -2.15732000  
C 1.30689000 -3.50072400 -1.09557100  
C 1.99115700 -1.54125800 -0.15298900  
C 2.58109800 -3.68809300 -0.52552500  
C 0.68042700 -4.54126800 -1.78398700  
C 3.25265900 -4.90478400 -0.60341300  
C 1.35618000 -5.75750100 -1.86912300  
H -0.30012600 -4.41807500 -2.24387200  
C 2.61870900 -5.94215900 -1.28550700  
H 4.24074900 -5.03625100 -0.15581400  
H 0.88774000 -6.58710300 -2.40671100  
H 3.11648700 -6.91214000 -1.37327100  
C -0.45172000 3.56365500 -1.27734400  
C 1.15259800 2.19380200 -0.40961100  
C 0.55946700 4.35536100 -0.69795700  
C -1.55866700 4.15978300 -1.88464500  
C 0.49789800 5.74631300 -0.70064800  
C -1.61870500 5.55253500 -1.88886500  
H -2.35332500 3.56886800 -2.34076900  
C -0.61041400 6.33576400 -1.30657400  
H 1.28875400 6.35001300 -0.24906700  
H -2.47477700 6.04477700 -2.35945000  
H -0.69387500 7.42604700 -1.33091100  
N -0.05835000 2.26007300 -1.06494600  
N 1.50007300 3.48111800 -0.17830400  
N 0.96233200 -2.19714400 -0.79811600  
N 2.94307600 -2.47878300 0.04234100  
C 4.20607400 -2.24761000 0.69476900  
H 4.21093600 -1.19547800 1.01690200  
H 4.30963500 -2.91084100 1.57079100  
H 5.03751500 -2.43726400 -0.00485500  
C 2.66519800 3.90707400 0.55550400  
H 3.11679900 3.00595300 0.99763800  
H 3.38520700 4.41034800 -0.11174500  
H 2.36548200 4.60454400 1.35614100  
Co 1.82093800 0.39950800 -0.08191100  
H 4.95833100 0.35132200 -0.50695100  
C 2.22032600 0.39771000 4.20999900  
C 3.71432100 0.57592000 4.50388800  
H 1.63989500 1.29572000 4.50753900  
H 1.78221400 -0.47521200 4.72627500  
H 3.90772900 1.28865300 5.32570600  
H 4.18514100 -0.39090700 4.77690300  
B 3.36333600 0.73903800 2.26226700  
O 2.16622000 0.22636100 2.81893300  
O 4.25854100 1.05259100 3.29960000  
N 3.48956200 0.85725800 0.89729200  
C 4.64516800 1.21377100 0.12493300  
C 5.86844600 1.69926600 0.89370500  
H 6.24280300 0.93181000 1.59161200  
H 6.68231100 1.95559800 0.19004900  
H 5.63904200 2.59538200 1.49651100  
B 2.30051200 0.36681700 -1.90707800  
O 2.79628100 -0.74930700 -2.57237000  
O 2.25439700 1.45285300 -2.77357100  
C 3.15873700 -0.38068100 -3.88757900  
C 2.52144100 0.99854900 -4.08534300  
H 4.26190400 -0.34312100 -3.96720100  
H 2.78782700 -1.13259300 -4.60497800  
H 3.18476300 1.71078200 -4.60532700  
H 1.57147900 0.93629600 -4.64963800  
H 4.37274500 1.99615700 -0.61602700  
W -1.91974900 -0.41408100 -0.13281000  
P -2.13777600 1.27580800 1.63297200  
P -4.33674200 -0.64073700 -0.16652400  
P -1.74969800 -2.15086200 1.57417500  
C -0.62019900 2.13957300 2.24308500  
H -0.81507100 2.64776600 3.20531400  
H 0.20902600 1.42178500 2.35806200  
H -0.31420700 2.90364600 1.51377800  
C -3.16475100 2.75340300 1.21046700

|                                      |             |             |             |    |             |             |             |
|--------------------------------------|-------------|-------------|-------------|----|-------------|-------------|-------------|
| H                                    | -3.11139100 | 3.52763000  | 1.99817900  | C  | 3.94488500  | 3.89410500  | -1.02948200 |
| H                                    | -2.80779600 | 3.18636200  | 0.26222900  | C  | 5.30934700  | 1.46207400  | -0.44698500 |
| H                                    | -4.21919000 | 2.45703200  | 1.07860500  | C  | 5.33387700  | 3.84269600  | -0.94057600 |
| C                                    | -2.87767300 | 0.90448000  | 3.29157300  | H  | 3.45134100  | 4.83439000  | -1.26845100 |
| H                                    | -2.99981500 | 1.83176100  | 3.88064700  | C  | 6.00959900  | 2.64660500  | -0.65656400 |
| H                                    | -3.85997800 | 0.42188500  | 3.18387000  | H  | 5.82167500  | 0.52184300  | -0.23394600 |
| H                                    | -2.21402800 | 0.22632900  | 3.85319200  | H  | 5.90838200  | 4.75899700  | -1.10404100 |
| C                                    | -5.52036000 | -0.42221500 | 1.24264900  | H  | 7.10187400  | 2.64290100  | -0.60126100 |
| H                                    | -5.26234000 | -1.09521500 | 2.07433200  | C  | -4.01548400 | 2.11762800  | -1.00091100 |
| H                                    | -5.48231000 | 0.61624200  | 1.61129700  | C  | -2.22231400 | 0.81429100  | -0.44605900 |
| H                                    | -6.55595300 | -0.63853000 | 0.92168200  | C  | -4.45699900 | 0.79196300  | -0.85876400 |
| C                                    | -5.20019700 | 0.47090300  | -1.36869300 | C  | -4.89701900 | 3.12704600  | -1.39105900 |
| H                                    | -4.79796400 | 0.32560100  | -2.38424500 | C  | -5.76792000 | 0.42592400  | -1.14630000 |
| H                                    | -6.28968700 | 0.28517500  | -1.39235400 | C  | -6.21891700 | 2.76546900  | -1.64253700 |
| H                                    | -5.01951300 | 1.52044500  | -1.08078800 | H  | -4.57300900 | 4.16020700  | -1.51388600 |
| C                                    | -4.92432500 | -2.28767900 | -0.76739200 | C  | -6.64757200 | 1.43485600  | -1.53147400 |
| H                                    | -6.00886300 | -2.29985800 | -0.98429400 | H  | -6.08391500 | -0.61618500 | -1.09526100 |
| H                                    | -4.36605100 | -2.55976200 | -1.67908700 | H  | -6.93137300 | 3.53639900  | -1.94957000 |
| H                                    | -4.70786400 | -3.05289200 | -0.00210300 | H  | -7.68652700 | 1.18132700  | -1.76042800 |
| C                                    | -3.08881400 | -2.57704300 | 2.78261000  | N  | -2.65537000 | 2.07913800  | -0.75518200 |
| H                                    | -3.95387200 | -2.99444000 | 2.24001500  | N  | -3.34196700 | 0.03361200  | -0.49969200 |
| H                                    | -2.73481900 | -3.33758300 | 3.50272800  | N  | 1.90088400  | 2.35493900  | -0.84413600 |
| H                                    | -3.42207600 | -1.69089800 | 3.34129900  | N  | 2.95862000  | 0.52147200  | -0.38054100 |
| C                                    | -1.47619700 | -3.86892700 | 0.95756400  | Co | -0.28856700 | 0.59708700  | -0.32964600 |
| H                                    | -1.47975500 | -4.60287600 | 1.78394500  | H  | -2.05722300 | -0.18290000 | 2.08180200  |
| H                                    | -2.27286100 | -4.13114600 | 0.24031200  | C  | 1.43149000  | -3.61848400 | -0.35630500 |
| H                                    | -0.50958900 | -3.93758200 | 0.44010700  | C  | 0.64466400  | -4.23935500 | 0.80602100  |
| C                                    | -0.33118200 | -1.98176000 | 2.73936300  | H  | 2.48751700  | -3.52325900 | -0.05597700 |
| H                                    | -0.52118400 | -1.13136400 | 3.41497600  | H  | -0.25694000 | -4.74958500 | 0.40677100  |
| H                                    | -0.17608600 | -2.89380800 | 3.34553300  | B  | 0.29814300  | -1.98572200 | 0.74684300  |
| H                                    | 0.58385800  | -1.73912700 | 2.17569000  | O  | 0.89600100  | -2.30525200 | -0.47155200 |
| <b><sup>1</sup>TS<sub>Dipp</sub></b> |             |             |             | O  | 0.22756000  | -3.12339300 | 1.55930900  |
| C                                    | -0.39142900 | 2.36153400  | -0.94226300 | N  | -0.27680200 | -0.75960100 | 1.12941100  |
| C                                    | -1.62478700 | 3.01606600  | -0.96486900 | C  | -1.29218500 | -0.96837800 | 2.16405800  |
| C                                    | -1.74465400 | 4.39402600  | -1.12852700 | C  | -0.72809000 | -0.97025500 | 3.57939800  |
| C                                    | -0.56828800 | 5.13818600  | -1.27036500 | H  | -0.12123700 | -0.07016400 | 3.77087600  |
| C                                    | 0.69056400  | 4.53203200  | -1.21328800 | H  | -1.53892200 | -1.00312800 | 4.33144500  |
| C                                    | 0.75224900  | 3.14772200  | -1.03312600 | H  | -0.08388100 | -1.84972900 | 3.73627400  |
| H                                    | -2.71010200 | 4.90188400  | -1.12545800 | B  | -0.07276100 | 1.31545200  | 1.38361500  |
| H                                    | -0.63257500 | 6.22127100  | -1.40900300 | O  | 1.12821500  | 1.71940100  | 1.96268400  |
| H                                    | 1.58074100  | 5.15431000  | -1.29338700 | O  | -1.14178400 | 1.87087400  | 2.07475500  |
| C                                    | 3.23699300  | 2.70779200  | -0.81234200 | C  | 0.86023600  | 2.75801200  | 2.88925100  |
| C                                    | 1.69538300  | 1.01729000  | -0.55227200 | C  | -0.65605000 | 2.65197300  | 3.15221900  |
| C                                    | 3.91927700  | 1.52300100  | -0.51745300 | H  | 1.07364300  | 3.72290100  | 2.38656500  |



H -0.83431300 2.09733400 4.09517400  
H -1.80785400 -1.93035500 2.00416900  
C 1.36360500 -4.41248300 -1.63821000  
H 1.89793900 -3.89971500 -2.45339400  
H 1.84831200 -5.39373000 -1.48734800  
H 0.32187000 -4.59106600 -1.95249100  
C 1.43367800 -5.21162900 1.65256200  
H 0.82331100 -5.56878700 2.49974300  
H 1.73951300 -6.08998800 1.05691700  
H 2.34085500 -4.73074400 2.05755700  
C -1.37144800 3.98192400 3.20920500  
H -2.45436400 3.83280100 3.35983300  
H -0.98929600 4.59633700 4.04411200  
H -1.22555600 4.53651300 2.26562300  
C 1.72985800 2.63639100 4.11794100  
H 2.79618600 2.70949700 3.84588900  
H 1.50288900 3.44707900 4.83304600  
H 1.56318900 1.66833600 4.62207200  
C 3.47716900 -0.81427300 -0.28803200  
C 3.91958900 -1.39956300 -1.49361300  
C 3.77853500 -1.35902500 0.96975900  
C 4.66288500 -2.57960900 -1.41090900  
C 4.54136900 -2.53571000 0.99729100  
C 4.98373200 -3.13713800 -0.17479900  
H 5.02276900 -3.05867300 -2.32425500  
H 4.80049700 -2.98280000 1.96041700  
H 5.58218000 -4.05210000 -0.12771700  
C -3.34369300 -1.39388700 -0.42198900  
C -4.05475800 -2.04962800 0.60155000  
C -2.63703900 -2.09790900 -1.42424900  
C -3.97129900 -3.44725900 0.64949900  
C -2.58405900 -3.48832200 -1.31974400  
C -3.23081800 -4.15817300 -0.28356700  
H -4.49739700 -3.98666100 1.44226500  
H -2.03448800 -4.06550200 -2.06529900  
H -3.16864000 -5.24859800 -0.21661000  
C 3.36615900 -0.68201200 2.26204200  
C 4.50439900 0.18143900 2.81292200  
C 2.90144500 -1.67880600 3.32163100  
H 2.52043600 -0.01457900 2.03683000  
H 4.77257600 0.99944900 2.12448000  
H 4.20562000 0.63595100 3.77399600  
H 5.41194400 -0.42413500 2.99438000  
H 2.11822800 -2.34821700 2.93090500

H 3.73401900 -2.29599000 3.70628700  
H 2.47858700 -1.13423400 4.18349100  
C -4.95059300 -1.34240800 1.60944700  
C -4.51705200 -1.53026200 3.06482900  
C -6.40044500 -1.82260200 1.46387800  
H -4.92434100 -0.26244400 1.39752700  
H -3.55693100 -1.04186000 3.27830100  
H -5.27461000 -1.08851000 3.73665500  
H -4.42269300 -2.59886800 3.32713200  
H -6.75306700 -1.81020300 0.41989500  
H -6.51266000 -2.85705900 1.83515400  
H -7.07648100 -1.18202800 2.05746300  
C 3.63205800 -0.73028400 -2.82680200  
C 2.20384500 -1.00630500 -3.29702300  
C 4.63823300 -1.07643300 -3.91880100  
H 3.71251500 0.35688700 -2.65980700  
H 1.47205900 -0.82554300 -2.49462000  
H 1.95202500 -0.36329800 -4.15948100  
H 2.09537800 -2.05746600 -3.61489800  
H 5.67727100 -0.89384700 -3.59290600  
H 4.55767600 -2.13026900 -4.24008600  
H 4.44993200 -0.45226800 -4.80992000  
C -2.02440300 -1.37595200 -2.61536400  
C -3.11220400 -0.84692300 -3.55527000  
C -1.03185000 -2.21525200 -3.40460900  
H -1.46269800 -0.50295700 -2.22886700  
H -3.82301300 -0.17219400 -3.05364400  
H -2.65405600 -0.28763200 -4.39016100  
H -3.68989500 -1.68641800 -3.98322400  
H -0.23004200 -2.59016500 -2.75444000  
H -1.52045600 -3.06866400 -3.90893200  
H -0.57002700 -1.59442000 -4.19072300  
**<sup>12</sup>D<sub>Dipp</sub>**  
C 0.04537600 -1.82001900 -1.19240100  
C -1.14484100 -2.44614800 -1.57325300  
C -1.15310000 -3.67319300 -2.23679900  
C 0.07930800 -4.26887800 -2.53695300  
C 1.29568900 -3.65513800 -2.20811100  
C 1.25321800 -2.43069000 -1.54228300  
H -2.07827100 -4.16776500 -2.53752100  
H 0.09234600 -5.23005000 -3.05922000  
H 2.23537500 -4.13417100 -2.48844800  
C 3.68386100 -1.70085100 -1.19884000  
C 1.89655300 -0.39786000 -0.58386200

|                                       |                                      |
|---------------------------------------|--------------------------------------|
| C 4.17318800 -0.49473300 -0.66336300  | C -3.63804900 3.94535000 1.43460400  |
| C 4.56591000 -2.68640800 -1.64137500  | H -3.78372600 4.72356500 -0.56915300 |
| C 5.53453200 -0.22610400 -0.57110000  | H -3.44524900 2.92235300 3.31880500  |
| C 5.93337300 -2.42380600 -1.54044500  | H -3.82014200 4.91819300 1.90228200  |
| H 4.21300200 -3.63340400 -2.05044700  | C 3.17175500 1.56202500 0.26223600   |
| C 6.41227600 -1.21479600 -1.01832800  | C 3.12668300 1.69428000 1.65984900   |
| H 5.89460200 0.72060700 -0.16126600   | C 3.36962100 2.65817100 -0.59838600  |
| H 6.64519100 -3.18204800 -1.87943700  | C 3.26392100 2.98075000 2.19423900   |
| H 7.49079800 -1.04273700 -0.95779700  | C 3.50282900 3.92268000 -0.01668000  |
| C -3.59438100 -1.75226000 -1.29935500 | C 3.44962900 4.08331300 1.36607800   |
| C -1.84621500 -0.42896300 -0.61855000 | H 3.23378100 3.11922900 3.27865300   |
| C -4.11813100 -0.56608800 -0.75289200 | H 3.65731700 4.79795800 -0.65351200  |
| C -4.44723100 -2.74117800 -1.78951700 | H 3.56091800 5.08099900 1.80274900   |
| C -5.48642900 -0.32550200 -0.68601400 | C 3.40754100 2.47764400 -2.10527900  |
| C -5.82109100 -2.50447700 -1.71935500 | C 4.45091000 3.36161200 -2.78407700  |
| H -4.06724400 -3.67101700 -2.21309500 | C 2.02044300 2.68510900 -2.71901200  |
| C -6.33480700 -1.31798300 -1.17896300 | H 3.69272000 1.43227600 -2.30326100  |
| H -5.87495300 0.60183400 -0.25868300  | H 5.44723600 3.24034600 -2.32340700  |
| H -6.51022600 -3.26556600 -2.09667600 | H 4.53667400 3.09040100 -3.85095400  |
| H -7.41741500 -1.16663500 -1.14068600 | H 4.18353900 4.43279800 -2.74255900  |
| N -2.22156400 -1.62547800 -1.20728900 | H 1.28664900 1.97543600 -2.30235400  |
| N -3.03145200 0.20276200 -0.35490300  | H 1.65689800 3.71364900 -2.53676900  |
| N 2.30728500 -1.59547600 -1.14708800  | H 2.05854200 2.53152300 -3.81251300  |
| N 3.06369400 0.26304600 -0.31017500   | C 2.97766500 0.48739700 2.56311400   |
| Co 0.02219500 -0.20567300 -0.26373700 | C 1.95365400 0.71140800 3.67121200   |
| H -0.01660800 -0.28767600 1.39052800  | C 4.33445600 0.07297500 3.13672600   |
| C 0.80125300 -3.50018200 2.19835000   | H 2.60688500 -0.35075900 1.95489100  |
| C -0.70378700 -3.63076400 1.88466000  | H 0.99435100 1.05982100 3.25446600   |
| H 0.94416700 -3.41753000 3.29558300   | H 1.76115500 -0.23588800 4.20441000  |
| H -0.83203600 -4.25549000 0.97749900  | H 2.29684100 1.44905800 4.41952700   |
| B 0.02623100 -1.58113400 1.22882200   | H 5.05914300 -0.15195300 2.33526800  |
| O 1.17580100 -2.26250900 1.61799000   | H 4.76437400 0.87002100 3.77141600   |
| O -1.10932000 -2.31129900 1.56904900  | H 4.22679500 -0.83548600 3.75639400  |
| N 0.00201700 1.68391500 -0.05235000   | C -3.36420300 2.49871100 -2.08545500 |
| C -0.00748300 2.81801000 0.16856500   | C -2.18111000 3.26631500 -2.67736400 |
| C -0.02949100 4.24023800 0.43249600   | C -4.68778700 2.95165900 -2.70202400 |
| H 0.52764500 4.78064200 -0.35041300   | H -3.22342200 1.43904700 -2.34737100 |
| H -1.07351800 4.59394100 0.44888600   | H -1.22311800 2.86794300 -2.30365900 |
| H 0.43949400 4.45115000 1.40761700    | H -2.17541700 3.17146600 -3.77793400 |
| C -3.19008200 1.48023400 0.25412700   | H -2.23194700 4.34400400 -2.43538200 |
| C -3.39004300 2.60031700 -0.57228100  | H -5.53919200 2.38353800 -2.28900300 |
| C -3.20701900 1.56470700 1.65806700   | H -4.87718700 4.02567700 -2.52353300 |
| C -3.61806000 3.83432000 0.04716100   | H -4.67543800 2.79277700 -3.79495400 |
| C -3.42668600 2.82229100 2.22996500   | C -3.04088400 0.33174300 2.52298100  |

C -4.40158100 -0.18156800 2.99939000  
C -2.09859900 0.56217000 3.70010000  
H -2.58811600 -0.45797100 1.90577500  
H -5.06861100 -0.40745300 2.14990100  
H -4.27554500 -1.11082400 3.58382300  
H -4.90803300 0.56157500 3.64296200  
H -1.13753000 0.98284300 3.36149500  
H -2.52788200 1.24351600 4.45729700  
H -1.88370300 -0.39716200 4.20227200  
C -1.54095900 -4.19648200 3.00759900  
H -1.44402300 -3.57449700 3.91533100  
H -2.60562000 -4.22339600 2.71829100  
H -1.22517200 -5.22628900 3.25194400  
C 1.65255400 -4.62854800 1.66339600  
H 1.36516300 -5.58905100 2.12765000  
H 1.53210700 -4.71476700 0.56933100  
H 2.71862700 -4.44553400 1.88248500  
**'TS4**  
C -0.01016100 1.63077800 -0.36463800  
C -1.21033600 2.33702500 -0.35896900  
C -1.24582100 3.73201500 -0.36481500  
C -0.02714800 4.42067900 -0.36788200  
C 1.20052200 3.74786100 -0.35788300  
C 1.18109500 2.35323900 -0.35590300  
H -2.18049200 4.29427600 -0.36549900  
H -0.03450300 5.51456800 -0.37215600  
H 2.12932700 4.32007300 -0.34919300  
C 3.64093100 1.61805400 -0.28760500  
C 1.91224100 0.12590300 -0.28644100  
C 4.16281700 0.31154500 -0.23423000  
C 4.49333000 2.72257100 -0.29863200  
C 5.53209900 0.06602400 -0.18928100  
C 5.86543200 2.47697500 -0.25295800  
H 4.11652700 3.74461100 -0.34134300  
C 6.37924800 1.17313400 -0.19871000  
H 5.92506800 -0.95257700 -0.14923600  
H 6.55594500 3.32534000 -0.25976700  
H 7.46199400 1.02197200 -0.16392100  
C -3.65821800 1.58855300 -0.21465900  
C -1.92614400 0.09892100 -0.30880900  
C -4.17505200 0.28194700 -0.14089200  
C -4.51194700 2.69160100 -0.17095500  
C -5.53942100 0.03332800 -0.02045000  
C -5.87896700 2.44354800 -0.05105100

H -4.14091100 3.71484500 -0.22573000  
C -6.38749900 1.13873900 0.02350300  
H -5.92860800 -0.98562800 0.04066700  
H -6.56955600 3.29101400 -0.01342600  
H -7.46627600 0.98550300 0.11901400  
N -2.28915700 1.42936800 -0.32272900  
N -3.09351200 -0.58109300 -0.21102400  
N 2.26830000 1.45651600 -0.32273200  
N 3.08000000 -0.55227000 -0.23771200  
C 3.21148300 -1.98308400 -0.15079500  
H 3.65517500 -2.38974600 -1.07633600  
H 3.85163400 -2.24739500 0.70698300  
H 2.20888100 -2.39828300 0.01011800  
C -3.24450500 -2.01023700 -0.12207300  
H -3.66174300 -2.28712200 0.86058300  
H -3.91603200 -2.37325600 -0.91861600  
H -2.25826600 -2.47194700 -0.23027700  
Co 0.00179800 -0.21514900 -0.34090000  
H -0.88511900 -2.87334200 2.14453100  
C -0.24328500 -2.20951600 -3.22766900  
C -0.29774400 -3.71615500 -2.95901600  
H -1.24853200 -1.79046300 -3.42306200  
H 0.41882300 -1.93710200 -4.06578600  
H -1.14852800 -4.20856800 -3.45968200  
H 0.63318000 -4.21854400 -3.28516900  
B -0.03504200 -2.61463400 -0.99741300  
O 0.26420100 -1.68224700 -2.01626300  
O -0.42985300 -3.82493400 -1.55523100  
N 0.00165400 -2.25471100 0.34254400  
C -0.30149400 -3.29845300 1.31015500  
C 0.93719100 -3.99183800 1.86350200  
H 1.62655700 -3.26172700 2.31851000  
H 0.65784600 -4.73625000 2.63236300  
H 1.48244200 -4.52401700 1.06351600  
B 0.05544100 -0.63089600 1.48782000  
O 1.20116000 -0.66242200 2.29577000  
O -1.08653800 -0.60094500 2.30305200  
C 0.81000000 -0.76497200 3.64581900  
C -0.68598100 -0.42633500 3.64259000  
H 0.99746300 -1.79237000 4.01624700  
H 1.40296200 -0.07029500 4.26657500  
H -1.27495700 -1.08206900 4.30862700  
H -0.86763200 0.62211500 3.94924200  
H -0.95196600 -4.06833300 0.84993100

**<sup>1</sup>TS2<sub>Dipp</sub>**

C 0.00381000 -2.04166900 -1.16405200  
C -1.18011900 -2.77307900 -1.25908700  
C -1.18526700 -4.13355800 -1.56644600  
C 0.04966200 -4.76327700 -1.77130800  
C 1.26285800 -4.07158000 -1.65430200  
C 1.21258400 -2.71286900 -1.34286300  
H -2.10579300 -4.71508900 -1.63963500  
H 0.06793800 -5.82916300 -2.01675800  
H 2.20336500 -4.60696200 -1.79352500  
C 3.64825700 -1.92092900 -1.19286700  
C 1.88095000 -0.55997800 -0.68639300  
C 4.14409700 -0.66004500 -0.81838600  
C 4.51849600 -2.93883100 -1.58623700  
C 5.50274800 -0.36321400 -0.85612900  
C 5.88228200 -2.65031600 -1.59995000  
H 4.15786200 -3.92282900 -1.88636000  
C 6.36861600 -1.38263800 -1.24803900  
H 5.86679000 0.63445300 -0.60248000  
H 6.58635000 -3.42986000 -1.90481200  
H 7.44410200 -1.18771900 -1.28753200  
C -3.63773600 -2.07506100 -0.99919700  
C -1.90277700 -0.63935100 -0.60798400  
C -4.16343800 -0.81376900 -0.66669700  
C -4.48466800 -3.13837400 -1.31449800  
C -5.53189900 -0.56328800 -0.67647100  
C -5.85734300 -2.89562500 -1.29593400  
H -4.09945900 -4.12387400 -1.57671800  
C -6.37466700 -1.62840700 -0.98978500  
H -5.92160300 0.43414700 -0.46351100  
H -6.54404200 -3.71176500 -1.53821500  
H -7.45677900 -1.47010600 -1.00329200  
N -2.26465200 -1.92156900 -0.96402400  
N -3.07649300 0.02470700 -0.42920700  
N 2.27302900 -1.81475500 -1.10485900  
N 3.03994200 0.13033100 -0.50634800  
Co -0.01702200 -0.31042800 -0.49043500  
H 0.06074500 1.63234700 2.57716900  
C 0.87450800 -2.03787400 3.09394100  
C -0.64619900 -2.26377300 2.99165200  
H 1.09371400 -1.37963100 3.95747100  
H -0.83837500 -3.27844800 2.58877000  
B 0.03558700 -0.93989100 1.27225500  
O 1.20315200 -1.33410100 1.90603500

O -1.07302000 -1.32662100 2.01260400  
N -0.02399800 1.14774300 0.56674400  
C -0.00253900 1.96559300 1.51482400  
C -0.05698700 3.45923700 1.34771300  
H -0.14209400 3.72523100 0.28219700  
H -0.92549700 3.87461900 1.89215900  
H 0.85343900 3.92676000 1.76639500  
C -3.23963400 1.41136800 -0.12165900  
C -3.03327000 2.35598500 -1.14834100  
C -3.67329000 1.77717300 1.16395000  
C -3.29040900 3.69690500 -0.85385300  
C -3.93255500 3.13322400 1.39965300  
C -3.74828000 4.08272600 0.40360600  
H -3.13570400 4.45833100 -1.62118500  
H -4.27847000 3.44923800 2.38814200  
H -3.95269200 5.13814900 0.60862400  
C 3.19109000 1.47922400 -0.05587500  
C 3.67622700 1.70208900 1.24503700  
C 2.92931400 2.53308300 -0.95514900  
C 3.93226700 3.02491200 1.62685700  
C 3.19170600 3.83395200 -0.51840600  
C 3.70095600 4.07952800 0.75446200  
H 4.31670600 3.22854200 2.63061300  
H 2.99750800 4.67772200 -1.18317800  
H 3.90665600 5.10720500 1.06956400  
C -2.56136200 1.92830400 -2.52726100  
C -1.90344100 3.05392600 -3.31614000  
C -3.69819700 1.31709200 -3.35161000  
H -1.79309500 1.15065100 -2.37000600  
H -1.12048000 3.55937700 -2.72906900  
H -1.43209300 2.64483400 -4.22653600  
H -2.63679400 3.81312800 -3.64246600  
H -4.15726100 0.44440300 -2.86120200  
H -4.49520200 2.06291200 -3.52564400  
H -3.32115300 0.98656400 -4.33596900  
C 2.37986900 2.26259600 -2.34514300  
C 3.44182300 1.67281400 -3.27772700  
C 1.75829900 3.49292900 -2.99536500  
H 1.57491800 1.51595600 -2.21807300  
H 3.86745900 0.73124100 -2.89742200  
H 3.00377300 1.46318600 -4.26987500  
H 4.27432100 2.38626800 -3.41748100  
H 1.02459000 3.98042400 -2.33228400  
H 2.52285300 4.24073700 -3.27329400

H 1.23544400 3.20175400 -3.92206000  
 C 3.91182600 0.58102900 2.24078200  
 C 3.07452100 0.78413300 3.50339600  
 C 5.39072000 0.43537800 2.60250000  
 H 3.56782300 -0.35770600 1.78193900  
 H 2.00504100 0.86525700 3.25609300  
 H 3.20502600 -0.07357400 4.18686900  
 H 3.37475900 1.69392100 4.05422700  
 H 6.01691300 0.24802500 1.71522900  
 H 5.77370200 1.34298000 3.10391900  
 H 5.53237500 -0.41344300 3.29550700  
 C -3.85372600 0.77368400 2.28890600  
 C -5.32403200 0.60939000 2.67921100  
 C -3.02660300 1.16166400 3.51407200  
 H -3.47258300 -0.19787700 1.93834500  
 H -5.94413700 0.27702700 1.83137500  
 H -5.42370600 -0.14492100 3.48038600  
 H -5.74651900 1.55780300 3.05873100  
 H -1.95839000 1.24349400 3.26153300  
 H -3.35770000 2.12391200 3.94440100  
 H -3.13339500 0.39510400 4.30039700  
 C -1.39258700 -2.09550000 4.29295200  
 H -2.47725300 -2.22939400 4.14180700  
 H -1.05574800 -2.84873500 5.02745700  
 H -1.21843900 -1.09208100 4.71723800  
 C 1.69156700 -3.30414000 3.20005200  
 H 1.41908100 -3.87349000 4.10671200  
 H 1.52013800 -3.94267700 2.31552700  
 H 2.76871600 -3.06951200 3.25251600  
**<sup>1</sup>LCoK<sub>Dipp</sub>**  
 C -0.00500800 -0.16953400 -1.91136700  
 C 1.01853000 -0.90494800 -2.51792800  
 C 0.78977400 -1.68107700 -3.65336900  
 C -0.50130600 -1.67777900 -4.20245800  
 C -1.54711800 -0.92931900 -3.64141000  
 C -1.27832300 -0.18837800 -2.48975500  
 H 1.57985800 -2.25799700 -4.13784100  
 H -0.69409600 -2.26182200 -5.10705700  
 H -2.52277700 -0.91352100 -4.13119800  
 C -3.47507000 0.95126000 -1.76990000  
 C -1.46403400 1.39058700 -0.77176000  
 C -3.67908600 1.90618500 -0.75245200  
 C -4.55155900 0.47211700 -2.51608900  
 C -4.94264600 2.40308500 -0.44893500  
 C -5.81881700 0.97132000 -2.21470500  
 H -4.41967000 -0.27408600 -3.30020500  
 C -6.01461400 1.91947800 -1.19932500  
 H -5.08211700 3.13810100 0.34722000  
 H -6.68039000 0.61308300 -2.78541300  
 H -7.02383100 2.28675000 -0.99307600  
 C 3.54971700 -0.97991800 -2.05556800  
 C 2.09749300 0.27346700 -0.80258500  
 C 4.29411600 -0.22561300 -1.12528900  
 C 4.19145700 -1.83781400 -2.94937400  
 C 5.68408400 -0.27128700 -1.08707800  
 C 5.58442000 -1.89896100 -2.89677700  
 H 3.63609000 -2.43703700 -3.67136800  
 C 6.32018000 -1.12512100 -1.98827800  
 H 6.24894100 0.34198600 -0.38129400  
 H 6.11305700 -2.55977600 -3.58956400  
 H 7.41183900 -1.18899500 -1.98705400  
 N 2.22515500 -0.65103500 -1.82911400  
 N 3.37372600 0.50197400 -0.37685000  
 N -2.12142300 0.67432800 -1.75566100  
 N -2.43214300 2.15710100 -0.19097600  
 Co 0.36824000 0.97048900 -0.54759900  
 K -0.85481400 -2.26672400 0.42125600  
 O -0.79895600 -3.32261700 3.03610000  
 O 1.58300000 -2.82210200 1.64487400  
 O -1.90448700 -4.50299600 -0.89295400  
 O -3.44054400 -1.99972700 -0.60986800  
 O 0.84881600 -4.02513800 -0.78904200  
 O -3.37067600 -3.21722800 1.87030300  
 C 0.43551000 -3.17514200 3.68837500  
 C -1.92224900 -3.07271100 3.83927700  
 C 1.52917900 -3.65620600 2.77190100  
 C 2.52470400 -3.18966500 0.66451000  
 C -3.27941000 -4.36764300 -1.16306600  
 C -1.08251500 -4.66512300 -2.02197100  
 C -3.66340400 -2.96922100 -1.60930000  
 C -4.47843400 -1.82207200 0.32615400  
 C 2.07690400 -4.34876700 -0.19774900  
 C 0.29944600 -5.05502200 -1.56713000  
 C -3.14001700 -3.67649300 3.17407100  
 C -3.95180000 -1.95018500 1.73603800  
 H 0.45896500 -3.78253500 4.61580600  
 H -2.04599200 -1.98299000 4.01064100  
 H -1.80689900 -3.54731100 4.83493700

H 1.31660600 -4.70497300 2.48671700  
H 2.49517300 -3.63906400 3.31595200  
H 3.50170800 -3.43309900 1.12478400  
H 2.65880600 -2.30069100 0.03145100  
H -3.79846100 -4.61645800 -0.22380100  
H -3.59339600 -5.09689500 -1.93808300  
H -1.02735500 -3.73758000 -2.62592100  
H -1.47392700 -5.47209900 -2.67463500  
H -3.05349200 -2.66345500 -2.47467100  
H -4.72218700 -2.96013800 -1.93314900  
H -4.92963200 -0.82036800 0.19084400  
H -5.27208500 -2.57573000 0.17422900  
H 1.98015500 -5.28045300 0.39683300  
H 2.85559300 -4.53098200 -0.96716500  
H 0.24218000 -5.99019400 -0.97355800  
H 0.92899100 -5.25076500 -2.45910200  
H -4.02670100 -3.50306200 3.81731100  
H -2.98733100 -4.76462000 3.08427400  
H -3.21860800 -1.14327100 1.94067500  
H -4.79243400 -1.81475000 2.44713400  
H 0.60846800 -2.11680800 3.96860500  
C 3.71769000 1.52961600 0.55623600  
C 3.84241300 1.22499400 1.92520400  
C 3.92092500 2.82785100 0.05013200  
C 4.20059300 2.26670500 2.78764500  
C 4.27161200 3.83414400 0.95525900  
C 4.41613800 3.55542600 2.30981400  
H 4.31054500 2.06982000 3.85657400  
H 4.43248900 4.85358400 0.59535700  
H 4.69521600 4.35383100 3.00398500  
C -2.14173300 3.17222000 0.76892400  
C -2.07304800 4.51009700 0.33800100  
C -1.90266500 2.79980500 2.10382500  
C -1.73735600 5.48056300 1.28798400  
C -1.55465600 3.80350500 3.01207200  
C -1.47203800 5.13288400 2.60827900  
H -1.67351500 6.52935700 0.98318900  
H -1.35231300 3.54479900 4.05487300  
H -1.20203300 5.90704100 3.33266300  
C -1.99999600 1.35349400 2.54212100  
C -2.71732600 1.18937500 3.88014800  
C -0.61987700 0.69609300 2.56975200  
H -2.59971100 0.83138900 1.77784500  
H -3.69291700 1.70555900 3.88166100

H -2.90005500 0.11973600 4.08733300  
H -2.12272500 1.58484600 4.72187900  
H -0.18197500 0.64238800 1.54675200  
H 0.07835000 1.25805200 3.21405800  
H -0.67792000 -0.33801800 2.95680600  
C -2.33465100 4.91621800 -1.09979600  
C -1.09260600 5.53931700 -1.73678700  
C -3.54161800 5.84912700 -1.20447900  
H -2.57085500 4.00681400 -1.67319000  
H -0.23415300 4.84814500 -1.69532800  
H -1.28526400 5.77853600 -2.79760900  
H -0.80123500 6.47658600 -1.23007800  
H -4.44651300 5.39019700 -0.77049500  
H -3.36182200 6.80535700 -0.68124200  
H -3.75588000 6.08179800 -2.26252700  
C 3.61949700 -0.17905500 2.45383600  
C 3.01784200 -0.20298200 3.85634800  
C 4.91873900 -0.98859700 2.42920900  
H 2.89846600 -0.67419600 1.78412500  
H 2.09892600 0.40427400 3.91832100  
H 2.76014400 -1.23906300 4.13335800  
H 3.72450900 0.16546700 4.62052600  
H 5.32071400 -1.09416700 1.40878800  
H 5.69371400 -0.50483900 3.05102300  
H 4.75051500 -2.00328800 2.83274900  
C 3.69828700 3.14844100 -1.41518000  
C 4.74016500 4.10564000 -1.98850400  
C 2.27977300 3.68717100 -1.61490600  
H 3.77627500 2.20763200 -1.98296400  
H 5.76680300 3.74276600 -1.80604300  
H 4.60326500 4.19929700 -3.07989900  
H 4.65467000 5.12080600 -1.56262300  
H 1.52279600 2.93905400 -1.30118600  
H 2.12114800 4.61023800 -1.02945500  
H 2.09261000 3.91494900 -2.67933600  
**14**  
C -0.01375200 -1.25652400 0.39767000  
C 1.17919400 -1.96289900 0.25273100  
C 1.20674100 -3.33229000 -0.01257300  
C -0.01936500 -3.99878000 -0.13996200  
C -1.24265700 -3.32543800 -0.02261400  
C -1.20935300 -1.95628200 0.24394600  
H 2.13804200 -3.89030000 -0.12526700  
H -0.02157300 -5.07359400 -0.34446600

H -2.17608400 -3.87791900 -0.14454700  
C -3.65944100 -1.17495800 0.30425000  
C -1.90226000 0.26103000 0.57777900  
C -4.16252800 0.12683500 0.50394300  
C -4.52886800 -2.24860600 0.10846800  
C -5.52831200 0.39521300 0.50439100  
C -5.89754200 -1.97935000 0.11170100  
H -4.16476800 -3.26518400 -0.04175100  
C -6.39194100 -0.68150300 0.30424700  
H -5.90892100 1.40892800 0.65039900  
H -6.60033700 -2.80359800 -0.04095300  
H -7.47211700 -0.50953100 0.29617700  
C 3.63274800 -1.19440700 0.32504300  
C 1.88217000 0.24693500 0.60914000  
C 4.14140000 0.10346200 0.53618300  
C 4.49755800 -2.26945900 0.11731400  
C 5.50821300 0.36618600 0.53793500  
C 5.86740000 -2.00578200 0.12117400  
H 4.12912800 -3.28286300 -0.04353400  
C 6.36730200 -0.71201400 0.32614400  
H 5.89302800 1.37699500 0.69285600  
H 6.56661600 -2.83120900 -0.04125200  
H 7.44814500 -0.54423400 0.31815000  
N 2.26006000 -1.06266200 0.38719300  
N 3.04761100 0.93264500 0.71879700  
N -2.28614400 -1.04842200 0.36429200  
N -3.06497400 0.95281600 0.67942700  
C -3.16291100 2.37095700 0.89907300  
H -3.45957400 2.89280200 -0.02741800  
H -3.90378700 2.58083900 1.68872300  
H -2.18027400 2.73577600 1.21990800  
C 3.15216900 2.34850900 0.94929100  
H 3.89442800 2.54861100 1.74023000  
H 3.45097300 2.87592700 0.02671100  
H 2.17149500 2.71585600 1.27344300  
Co -0.00765300 0.59089500 0.59145000  
H 0.02642900 4.21150000 -0.99913200  
C -0.67918400 0.62583300 -3.21790400  
C 0.83042400 0.89499100 -3.31826200  
H -0.88402300 -0.45077000 -3.05774400  
H -1.23554500 0.95151400 -4.11425000  
H 1.39936800 -0.00646200 -3.60776400  
H 1.05821200 1.69306600 -4.05265200  
B 0.03708100 1.50545600 -1.28029300

O -1.09549500 1.36575800 -2.09397400  
O 1.20849000 1.32112700 -2.02936100  
N 0.01116100 2.37544200 -0.07186500  
C 0.01071700 3.64430100 -0.04881300  
C -0.00876200 4.45797900 1.20271800  
H 0.87540300 5.12226900 1.25042000  
H -0.89434200 5.12170000 1.22434700  
H -0.02160500 3.81097400 2.09538300  
**<sup>1</sup>TS2K<sub>Dipp</sub>**  
C -0.82344700 0.12531500 -2.02240400  
C -0.46308700 1.27112000 -2.73216000  
C -0.34743300 1.27180800 -4.12291200  
C -0.59563300 0.07030900 -4.80186600  
C -0.96016300 -1.10276300 -4.12563800  
C -1.07035100 -1.04839000 -2.73638600  
H -0.09936900 2.17119000 -4.68951500  
H -0.51767900 0.05124000 -5.89280200  
H -1.17089600 -2.01047000 -4.69383600  
C -1.70181800 -3.40978200 -1.96623300  
C -1.65556800 -1.62171200 -0.53659300  
C -2.05555700 -3.85210300 -0.67994200  
C -1.60769000 -4.31128700 -3.02747600  
C -2.30349100 -5.19319100 -0.40363300  
C -1.87262500 -5.65305400 -2.75611800  
H -1.33103800 -3.99329400 -4.03299900  
C -2.21073000 -6.08998100 -1.46665400  
H -2.55358900 -5.52312300 0.60699300  
H -1.80911300 -6.38161500 -3.56947400  
H -2.40347500 -7.15213000 -1.29117500  
C 0.24625400 3.60085300 -1.95025400  
C -0.65447000 2.05262900 -0.52382200  
C 0.20011500 4.15321900 -0.65926500  
C 0.80284400 4.31573800 -3.01259800  
C 0.69310900 5.42620200 -0.38647300  
C 1.30097500 5.58901300 -2.73971600  
H 0.85472100 3.90425500 -4.02105200  
C 1.24520200 6.13832700 -1.44980200  
H 0.63844600 5.84770700 0.61945700  
H 1.74005600 6.17364000 -3.55317000  
H 1.63783000 7.14407400 -1.27570100  
N -0.29475900 2.33607000 -1.82631000  
N -0.37061500 3.19135100 0.17152200  
N -1.47154100 -2.05294900 -1.83544400  
N -2.03799600 -2.73384700 0.14982700

Co -1.31478500 0.25319600 -0.23858800  
 H -4.14811100 1.03241300 1.89498300  
 C -5.13068600 0.39952200 -1.70482900  
 C -4.65650600 1.85280900 -1.91048200  
 H -5.96192800 0.38033800 -0.97427100  
 H -4.35081100 1.99696400 -2.96531600  
 B -3.06314100 0.68448400 -0.76960000  
 O -4.01561100 -0.25497000 -1.11537200  
 O -3.48653600 1.95739400 -1.10858000  
 N -2.24744200 0.50868600 1.27486100  
 C -3.10321800 0.74812100 2.15704900  
 C -2.83488900 0.67730900 3.63497500  
 H -1.77060400 0.46349300 3.82413100  
 H -3.10291500 1.63117700 4.12545300  
 H -3.44970600 -0.11748300 4.09661000  
 K 3.65196500 -0.82419700 0.01590200  
 O 3.41101400 1.09025300 -1.92319000  
 O 5.53207100 -0.34244300 2.01279900  
 O 2.92823500 -1.67674600 -2.45638100  
 C 4.27736200 2.18138600 -1.71865600  
 C 3.37896700 0.59423400 -3.24161600  
 C 5.74399500 -1.30825000 3.01019500  
 C 6.68577400 0.39329400 1.69597700  
 C 3.90690900 -2.52666700 -2.99242900  
 C 2.48657800 -0.62385700 -3.28294900  
 C 5.72604000 1.75017700 -1.58615200  
 H 3.93762800 2.67694000 -0.79267600  
 H 4.17895300 2.91996600 -2.53908300  
 H 2.96164400 1.35789600 -3.92843500  
 H 4.39861300 0.34742900 -3.59871400  
 C 4.51947200 -2.19228300 3.11514000  
 H 6.64649100 -1.90563500 2.77149700  
 H 5.92206500 -0.82897000 3.99464300  
 C 6.36275100 1.45586700 0.68104300  
 H 7.46728600 -0.28191800 1.29193300  
 H 7.09524500 0.88746300 2.60002400  
 C 4.03001100 -3.73065900 -2.09559000  
 H 3.61504500 -2.86770500 -4.00584000  
 H 4.89015100 -2.01864900 -3.07518700  
 H 1.48797400 -0.34975300 -2.91408400  
 H 2.38416000 -0.96704600 -4.32942100  
 O 5.91950000 0.85710300 -0.51022900  
 H 6.05784700 1.22440200 -2.49794000  
 H 6.36842700 2.64447800 -1.47518500  
 O 4.15500100 -2.78676900 1.89378800  
 H 4.69313000 -2.96152500 3.89381900  
 H 3.65077900 -1.58884400 3.42764100  
 H 5.60107100 2.14811400 1.09244700  
 H 7.28458900 2.04358000 0.49873200  
 O 4.48049400 -3.32132800 -0.82905700  
 H 3.03980200 -4.22180700 -2.01029500  
 H 4.73769900 -4.45560100 -2.54659400  
 C 5.00397200 -3.80895700 1.43285300  
 C 4.46430400 -4.34339200 0.13295700  
 H 6.03176600 -3.43189600 1.26709900  
 H 5.05381300 -4.63380500 2.17147700  
 H 5.09652600 -5.19607900 -0.18825900  
 H 3.43126200 -4.72160200 0.27515200  
 C -0.50273800 3.41072900 1.58091600  
 C 0.62783200 3.20315100 2.38946200  
 C -1.71334000 3.91768600 2.09747500  
 C 0.51996000 3.47963300 3.75707100  
 C -1.76506500 4.18275000 3.46908200  
 C -0.66538700 3.96306600 4.29382600  
 H 1.38390800 3.32297900 4.40980800  
 H -2.68756500 4.57048800 3.90631300  
 H -0.73503900 4.17787800 5.36449500  
 C -2.39382000 -2.82370400 1.53256800  
 C -3.75404600 -2.80542900 1.89156200  
 C -1.36964100 -3.02695100 2.47398500  
 C -4.06448300 -2.94983600 3.24831900  
 C -1.73092300 -3.15224400 3.81820600  
 C -3.06704000 -3.11071100 4.20351300  
 H -5.11202300 -2.94041400 3.56233100  
 H -0.95766900 -3.29694900 4.57704000  
 H -3.33399200 -3.21617000 5.25949800  
 C 1.96041800 2.74268900 1.82998000  
 C 2.42257800 1.44474700 2.48810900  
 C 3.01905200 3.83749200 1.97255100  
 H 1.82920700 2.53955600 0.75412000  
 H 1.69380900 0.63907600 2.30949000  
 H 3.41277900 1.13430300 2.10942900  
 H 2.53072300 1.55720100 3.58131900  
 H 2.70344800 4.77412600 1.48432300  
 H 3.22696200 4.06081500 3.03410500  
 H 3.96941400 3.52026500 1.50693400  
 C 0.08275100 -3.08687600 2.04893500  
 C 0.89460000 -4.13523000 2.80503700



C 0.72325400 -1.70649300 2.17071200  
 H 0.10579100 -3.36437000 0.98172400  
 H 0.43875200 -5.13770900 2.72476400  
 H 1.91724400 -4.18152400 2.39191400  
 H 0.99172900 -3.89089800 3.87765500  
 H 0.17483600 -0.95862500 1.57069200  
 H 0.71599500 -1.36001400 3.21980800  
 H 1.77396400 -1.75725300 1.83770600  
 C -4.86682400 -2.68889900 0.86754200  
 C -5.88788300 -1.61490900 1.23640900  
 C -5.56535600 -4.03534300 0.66289800  
 H -4.41323500 -2.38024600 -0.08545800  
 H -5.40287500 -0.63707400 1.38091900  
 H -6.63230000 -1.51069800 0.42767800  
 H -6.44260800 -1.86626800 2.15830400  
 H -4.86174900 -4.82049300 0.34163400  
 H -6.05446500 -4.37696800 1.59341300  
 H -6.34533300 -3.94750400 -0.11477000  
 C -2.90840700 4.20257100 1.20777100  
 C -2.77815700 5.56325900 0.51526600  
 C -4.24202900 4.14299900 1.94817000  
 H -2.93220500 3.42736500 0.42566400  
 H -1.88807900 5.62481600 -0.12984200  
 H -3.66115400 5.74999800 -0.12202700  
 H -2.71880300 6.38027100 1.25772700  
 H -4.35194700 3.21640700 2.53525900  
 H -4.37870300 5.00046600 2.63144500  
 H -5.06981900 4.17823300 1.21972700  
 C -5.67657400 2.90074800 -1.53636400  
 H -5.26108200 3.91463200 -1.66554000  
 H -6.57057100 2.81386600 -2.17899500  
 H -5.99077700 2.78070000 -0.48505000  
 C -5.54961900 -0.30959300 -2.97090700  
 H -6.40026100 0.20886700 -3.44797000  
 H -4.70899400 -0.34230000 -3.68638800  
 H -5.85868900 -1.34613100 -2.75177100  
**<sup>1</sup>TS4<sub>PMe</sub>**  
 C 0.13815200 0.03751900 -0.77731700  
 C -0.49808500 1.19580200 -1.25957100  
 C -1.64823000 1.11139200 -2.09950600  
 C -2.08413800 -0.16900200 -2.55048300  
 C -1.44991200 -1.35587600 -2.05844600  
 C -0.32668200 -1.23185400 -1.19960700  
 H -2.15484800 1.99918400 -2.47525700  
 H -2.92465800 -0.24366900 -3.24309900  
 H -1.79179800 -2.32819600 -2.41221400  
 C 0.61476000 -3.59528000 -0.92061900  
 C 1.75339100 -1.74573500 -0.22421700  
 C 1.85394200 -3.99826900 -0.38545300  
 C -0.28276200 -4.53975100 -1.42217300  
 C 2.22998100 -5.33807000 -0.33224500  
 C 0.09271100 -5.88144700 -1.36511900  
 H -1.24488000 -4.25297800 -1.84634600  
 C 1.32733700 -6.27715500 -0.82912700  
 H 3.19237000 -5.64172900 0.08639200  
 H -0.59415800 -6.64127900 -1.74911700  
 H 1.58669200 -7.33943500 -0.80106000  
 C -0.00799500 3.69585800 -0.95383200  
 C 1.34767200 2.07441400 -0.10411700  
 C 1.00871300 4.30880500 -0.19421200  
 C -0.96861300 4.47111200 -1.60581500  
 C 1.08918500 5.69115300 -0.05052300  
 C -0.88739500 5.85526100 -1.46334800  
 H -1.75405100 4.02184600 -2.21324500  
 C 0.12115500 6.45887700 -0.69670500  
 H 1.88204500 6.15605300 0.54030700  
 H -1.62827300 6.48422300 -1.96545900  
 H 0.15261100 7.54871300 -0.60984600  
 N 0.22249500 2.34143000 -0.84477400  
 N 1.79320300 3.28717800 0.31254900  
 N 0.59894400 -2.22202400 -0.80151100  
 N 2.50879800 -2.84816400 0.01431800  
 C 3.86884700 -2.85522700 0.48922900  
 H 3.92282500 -3.22193500 1.52828400  
 H 4.47551700 -3.50612500 -0.16146000  
 H 4.25950400 -1.83233400 0.42605800  
 C 2.88819900 3.51910100 1.21739500  
 H 2.53984700 4.11060200 2.08135800  
 H 3.26217200 2.55031900 1.56679400  
 H 3.70615500 4.06120800 0.71480700  
 Co 1.81556800 0.18682500 0.02777400  
 H 4.68741300 1.99800800 -0.74359400  
 C 2.91674000 -0.59683900 3.72761700  
 C 4.36787400 -0.14765200 3.92610300  
 H 2.20350700 0.14027000 4.14248900  
 H 2.69997400 -1.57870200 4.18187000  
 H 4.48947400 0.54407100 4.77771400  
 H 5.04170800 -1.01162100 4.08895500

B 3.79552200 0.08738900 1.74111600  
O 2.76594500 -0.66602600 2.32688200  
O 4.70525300 0.49668300 2.71947400  
N 3.86750900 0.42586000 0.39049000  
C 4.99137400 1.28782100 0.04312200  
C 6.20570200 0.49482200 -0.42605000  
H 5.95062400 -0.16119000 -1.27478100  
H 7.02591500 1.16904900 -0.73655700  
H 6.58541500 -0.14713600 0.38924000  
B 3.00489700 0.17601500 -1.41227700  
O 3.58081600 -0.93297800 -2.05346200  
O 3.16045900 1.30617400 -2.22564400  
C 3.95155600 -0.56126400 -3.35953400  
C 3.96965500 0.97082800 -3.33038400  
H 4.93241400 -0.99762800 -3.61959000  
H 3.20492600 -0.94465400 -4.08244100  
H 4.99390800 1.36724000 -3.18238200  
H 3.56010100 1.42300300 -4.25018500  
H 5.30204600 1.89783600 0.91189600  
W -2.13881500 -0.13818400 -0.24797800  
P -3.65309500 1.65568200 0.41605400  
P -3.83168800 -1.86332600 0.01767900  
P -1.45663100 -0.40475000 2.07412000  
C -4.62481700 -2.43242700 -1.55744900  
H -3.87152300 -2.82825900 -2.25759400  
H -5.38075100 -3.21791000 -1.37486100  
H -5.11227300 -1.56581200 -2.03615900  
C -5.39809300 -1.76483000 1.00860800  
H -6.09535800 -1.05506100 0.53580500  
H -5.88866200 -2.75453100 1.05238900  
H -5.19835400 -1.42343500 2.03631400  
C -3.24640600 -3.48983400 0.68262100  
H -3.06890800 -3.39307000 1.76751800  
H -3.98932800 -4.29323400 0.52216000  
H -2.29379400 -3.77619300 0.21006400  
C -5.15555300 1.48585600 1.49061600  
H -5.52292300 2.48158800 1.79946500  
H -5.95974400 0.97965000 0.93408900  
H -4.93184600 0.89271800 2.38987000  
C -4.49388000 2.55862100 -0.96901000  
H -4.99298300 1.82271100 -1.62287400  
H -5.24349600 3.27797400 -0.59199300  
H -3.75746400 3.11294000 -1.57156200  
C -2.89042100 3.09627900 1.29351000

H -1.93591300 3.36470500 0.81463500  
H -3.55598600 3.97928800 1.28895100  
H -2.68620300 2.81837100 2.34155000  
C -2.65032500 -0.49211600 3.48755500  
H -3.24303400 0.43637500 3.53607800  
H -3.34484500 -1.33653400 3.34109900  
H -2.13093100 -0.62720600 4.45419300  
C -0.32254400 0.89240600 2.74568800  
H -0.76367000 1.89472700 2.63135500  
H -0.08628100 0.71902000 3.81139900  
H 0.60882800 0.86530100 2.15607100  
C -0.42791400 -1.88465400 2.48491200  
H -0.20568500 -1.92948200 3.56693600  
H -0.94402600 -2.81101700 2.18727000  
H 0.52623600 -1.81905400 1.93858600  
**<sup>13</sup>W<sub>PMc</sub>**  
C -0.39239200 0.61658300 -0.61628900  
C 0.92793300 0.67181800 -1.12844200  
C 1.36422000 -0.20661800 -2.15703500  
C 0.45827100 -1.25990800 -2.52560100  
C -0.86437400 -1.38839400 -1.99044200  
C -1.25149700 -0.42842200 -1.00861100  
H 2.33930000 -0.12797700 -2.63481000  
H 0.77106000 -1.97156600 -3.29498200  
H -1.52205500 -2.18244100 -2.34149200  
C -3.79471000 -0.67071300 -0.69824200  
C -2.57129200 0.88088900 0.42758600  
C -4.66442000 0.12815500 0.07283600  
C -4.30121700 -1.67862900 -1.51903900  
C -6.04266500 -0.06338100 0.06149500  
C -5.68334000 -1.86600800 -1.53485100  
H -3.64870900 -2.30281400 -2.13026800  
C -6.54203300 -1.07689500 -0.75607100  
H -6.70601900 0.56001900 0.66600700  
H -6.10479200 -2.64903900 -2.17187400  
H -7.62050100 -1.25567200 -0.79307500  
C 2.75926500 2.45355500 -0.85520800  
C 0.76763200 2.57712100 0.23797400  
C 2.72969100 3.63925300 -0.09110900  
C 3.87915100 2.13002500 -1.62184100  
C 3.80320600 4.52474800 -0.07002600  
C 4.95349900 3.01932800 -1.60100100  
H 3.92408900 1.21713400 -2.21659000  
C 4.91938500 4.19659800 -0.83941800

H 3.77228800 5.43951700 0.52677800  
H 5.84374200 2.78942800 -2.19363300  
H 5.78238500 4.86858600 -0.84789500  
N 1.55013400 1.83499900 -0.61765100  
N 1.50257200 3.66645900 0.55203800  
N -2.52181700 -0.20870600 -0.41660400  
N -3.87395200 1.04726600 0.74103500  
C -4.37586100 2.13028700 1.54553200  
H -5.12029100 2.71041600 0.97385800  
H -4.84121700 1.75043500 2.47160700  
H -3.52088700 2.77284700 1.79988000  
C 1.04704700 4.73288200 1.40464200  
H 1.65008900 4.77965500 2.32807700  
H 1.11575600 5.69787300 0.87409800  
H 0.00029900 4.52331400 1.66480400  
Co -0.96598700 1.88473400 0.61269200  
H -1.75284900 3.71256900 3.80620800  
C -2.67273000 3.10203800 -2.97330600  
C -1.21114600 3.50430900 -3.19333400  
H -3.06391000 2.44959700 -3.77263900  
H -3.33961200 3.98145400 -2.89015800  
H -0.69977700 2.82452700 -3.90111300  
H -1.09709000 4.53727400 -3.56471200  
B -1.43859100 2.59686600 -1.11148000  
O -2.66272200 2.40308400 -1.74467000  
O -0.61628700 3.37792000 -1.91743000  
N -1.14020500 2.41286500 2.31801100  
C -1.26429000 2.74516200 3.51782200  
C -0.79122600 1.93682900 4.70297500  
H -0.44075100 0.94332000 4.37822800  
H 0.03684900 2.45294700 5.22720400  
H -1.60475900 1.80689100 5.44216200  
W 0.72529800 -1.44966400 -0.30192200  
P -0.57970100 -2.70905600 1.31554000  
P 2.04677100 -3.39326800 -0.86139200  
P 2.34214100 -0.89724600 1.44459600  
C 0.02219400 -4.21059200 2.22063200  
C -2.13760000 -3.46412600 0.67460600  
C -1.24683500 -1.73483400 2.73458400  
C 1.10352400 -4.77821100 -1.64778000  
C 3.09079900 -4.40175300 0.29150900  
C 3.33196400 -3.11798200 -2.16788100  
C 2.65089900 -1.96208700 2.93264200  
C 2.17410600 0.71228100 2.34767900

C 4.09746400 -0.71287800 0.88829400  
H -0.73575800 -4.56270400 2.94455300  
H 0.20905500 -5.02008500 1.49413100  
H 0.95856900 -4.00710700 2.76006900  
H -1.89767100 -4.10427500 -0.19171300  
H -2.64653200 -4.07160600 1.44533900  
H -2.82900700 -2.67755400 0.34155400  
H -1.67113100 -0.78940300 2.35657500  
H -2.01507400 -2.29166200 3.30274400  
H -0.42207000 -1.46993300 3.41751200  
H 0.48506100 -4.37702800 -2.46845400  
H 1.76692900 -5.56831400 -2.04650900  
H 0.42305600 -5.22902400 -0.90488800  
H 2.47190800 -4.81982100 1.10009300  
H 3.58323700 -5.23416600 -0.24430500  
H 3.87103800 -3.76992900 0.74669800  
H 4.07978600 -2.39577500 -1.79841500  
H 3.84545600 -4.05701900 -2.44481700  
H 2.86955000 -2.69252400 -3.07356600  
H 1.75044100 -1.98244700 3.56889400  
H 2.89568200 -2.99417700 2.64111500  
H 3.48751900 -1.55731800 3.53074000  
H 1.11247900 0.96219200 2.50555000  
H 2.70070400 0.67806100 3.31846000  
H 2.62454200 1.52019400 1.75061400  
H 4.74947400 -0.34901100 1.70426500  
H 4.48761100 -1.67880300 0.52664000  
H 4.13607200 0.00672300 0.05455000  
**13K**  
C -0.00460400 1.26299100 -0.92271800  
C 1.19893900 1.17992400 -1.62538900  
C 1.21683700 1.02781000 -3.01180100  
C -0.01051500 0.98631800 -3.68525300  
C -1.23523600 1.08950900 -3.01177300  
C -1.21158900 1.22426300 -1.62319300  
H 2.14597900 0.94859400 -3.57720600  
H -0.01308800 0.88096000 -4.77383800  
H -2.16663400 1.07732200 -3.57974400  
C -3.65228700 1.29503800 -0.84079900  
C -1.89520800 1.51023300 0.59519000  
C -4.14858300 1.43251500 0.46864300  
C -4.52131200 1.12870700 -1.91782900  
C -5.51234000 1.39861000 0.74402100  
C -5.88844300 1.09661900 -1.64304800

H -4.16047900 1.02902200 -2.94195700  
C -6.37793100 1.22787600 -0.33582800  
H -5.89229700 1.49825100 1.76338900  
H -6.59369400 0.96983300 -2.46925100  
H -7.45665100 1.19851600 -0.15895100  
C 3.64582400 1.28187100 -0.85710100  
C 1.89543900 1.43889100 0.59637500  
C 4.14803200 1.41643200 0.45046400  
C 4.50886100 1.17001600 -1.94664100  
C 5.51498200 1.41983300 0.71191200  
C 5.87849300 1.18158000 -1.68492800  
H 4.14038900 1.07816100 -2.96869500  
C 6.37490800 1.29884100 -0.37893000  
H 5.90221300 1.51211500 1.72926700  
H 6.57998800 1.09880900 -2.51986600  
H 7.45558600 1.30061700 -0.21180700  
N 2.26825400 1.26980800 -0.71940800  
N 3.04882300 1.52520700 1.29266500  
N -2.27530600 1.34633400 -0.71678400  
N -3.04531600 1.57130200 1.30216000  
C -3.13643700 1.78489800 2.72385900  
H -4.02709700 2.39316100 2.94703400  
H -3.20570200 0.82904800 3.27156800  
H -2.24777200 2.33650000 3.05881600  
C 3.14238200 1.72579600 2.71567500  
H 3.19323300 0.76341900 3.25394700  
H 4.04347900 2.31578800 2.94357300  
H 2.26355500 2.29110700 3.05476500  
Co 0.00107000 1.49773900 0.90655100  
H 0.01382700 1.95776900 2.52376900  
C -0.66066800 5.39421400 -0.43025400  
C 0.83250400 5.23055800 -0.73416500  
H -1.25070000 5.67946600 -1.31710400  
H -0.84760900 6.14152500 0.36277200  
H 1.02536800 5.11528000 -1.81671600  
H 1.44484200 6.06889600 -0.36226700  
B 0.04832000 3.33900900 0.26223500  
O -1.07137500 4.11552200 0.02777900  
O 1.19893300 4.03161500 -0.07097100  
N -0.05379300 -0.16222800 2.09894700  
C -0.02147100 0.76540100 2.91063400  
C -0.01262500 0.82226100 4.40611700  
H -0.04894200 -0.19756600 4.82204800  
H 0.89704300 1.33041400 4.77187800  
H -0.87687500 1.39831600 4.78127400  
K 0.06020600 -1.92550800 -0.00251100  
O 1.00565300 -3.43909900 2.13654400  
O 2.82402200 -2.08371200 0.39588100  
O -1.06680700 -3.47791300 -2.09041500  
O -2.65830600 -1.67533200 -0.44714600  
O 1.66398900 -2.72912800 -2.11087300  
O -1.81110900 -3.51647900 1.49102000  
C 2.21229300 -2.86384000 2.55845600  
C 0.01230500 -3.46973500 3.12787400  
C 3.21659000 -2.93837800 1.43882100  
C 3.56503900 -2.22038700 -0.79298600  
C -2.47116200 -3.41184300 -2.12839000  
C -0.39884500 -3.05142800 -3.24993200  
C -3.00888500 -2.04106900 -1.75971200  
C -3.50399900 -2.16058100 0.56746800  
C 2.94216300 -3.19482200 -1.76511500  
C 1.04975800 -3.45219900 -3.14400400  
C -1.20840900 -4.17210400 2.57584600  
C -2.69481500 -2.46872400 1.80266300  
H 2.61849800 -3.41196900 3.43399000  
H -0.23260700 -2.43865900 3.45206600  
H 0.36767600 -4.03559300 4.01518600  
H 3.28785800 -3.98827600 1.09153200  
H 4.21158500 -2.63795200 1.82633300  
H 4.60729900 -2.52393700 -0.57793000  
H 3.59997200 -1.22579600 -1.26234100  
H -2.83064800 -4.16405100 -1.40644600  
H -2.84798000 -3.70028900 -3.13085200  
H -0.47173300 -1.95260800 -3.38759900  
H -0.83261400 -3.53695900 -4.14779900  
H -2.57559600 -1.27323900 -2.42178400  
H -4.10696000 -2.01497400 -1.90084000  
H -4.28106900 -1.40748000 0.80609000  
H -4.01403600 -3.08742200 0.24511500  
H 2.87441000 -4.21341600 -1.32902900  
H 3.59314300 -3.25878600 -2.66181300  
H 1.10801700 -4.54104000 -2.94309000  
H 1.55532700 -3.25333600 -4.11135700  
H -1.93940300 -4.32363800 3.39546900  
H -0.90446500 -5.16470600 2.20268000  
H -2.14504100 -1.56539100 2.13616000  
H -3.38904800 -2.77119100 2.61365900  
H 2.05649100 -1.80607800 2.85257200

**<sup>1</sup>TS3K<sub>Dipp</sub>**

C -0.30212000 -0.46348100 -1.16996700  
C 0.76201500 0.30517300 -1.63100900  
C 1.73223900 -0.24070800 -2.47443200  
C 1.59174400 -1.58491800 -2.85335900  
C 0.52822700 -2.38055000 -2.40782700  
C -0.41183100 -1.79674300 -1.55373800  
H 2.58359400 0.33408100 -2.84225600  
H 2.34398800 -2.02339000 -3.51375100  
H 0.45659900 -3.41678600 -2.74027700  
C -2.02656100 -3.66326400 -0.89235300  
C -2.28373100 -1.50868300 -0.16045400  
C -3.14499400 -3.60375900 -0.04680800  
C -1.62916100 -4.87433500 -1.46044600  
C -3.88996100 -4.73380100 0.27384600  
C -2.37825400 -6.00797400 -1.14650500  
H -0.76972200 -4.94976500 -2.12629900  
C -3.48748300 -5.94265600 -0.29118100  
H -4.75095400 -4.66862000 0.94257300  
H -2.09008800 -6.97064600 -1.57826800  
H -4.04694400 -6.85436900 -0.06389600  
C 1.38323500 2.76250800 -1.34379900  
C -0.37110700 1.81348000 -0.21089100  
C 0.79106100 3.73698800 -0.52868700  
C 2.45234400 3.08834100 -2.17691000  
C 1.28897900 5.03391900 -0.44879200  
C 2.93818600 4.39369400 -2.12117300  
H 2.89867400 2.36038300 -2.85223400  
C 2.38098700 5.34762700 -1.25618700  
H 0.83058000 5.77200900 0.21239100  
H 3.77248200 4.67908100 -2.76874600  
H 2.79512000 6.35949300 -1.22937200  
N 0.66878200 1.60106100 -1.09885700  
N -0.28530200 3.12961500 0.11614200  
N -1.54359400 -2.36727900 -0.94981500  
N -3.28094800 -2.27788000 0.35861300  
Co -1.54488800 0.28174800 0.00537000  
H -4.06099500 0.17327700 0.04166300  
C -3.10098400 -0.45362500 -4.05324200  
C -1.83663000 0.40048900 -4.27600400  
H -3.93666800 -0.03276600 -4.64889400  
H -0.94088300 -0.24054000 -4.14126600  
B -2.69357100 0.83885500 -2.22546000  
O -3.40475700 -0.26524200 -2.68054400

O -1.86591700 1.34334100 -3.22137700  
N -2.83825300 1.52565700 -0.99241300  
C -3.46797900 1.09517100 0.11197000  
C -4.10377700 2.06364000 1.07413200  
H -5.03077800 2.45153400 0.61037300  
H -4.38890500 1.55299800 2.00908600  
H -3.45721400 2.91732900 1.30874400  
B -0.27085700 -0.53858700 1.19957800  
O -0.34957300 -1.84896600 1.65114500  
O 0.92486600 0.02388800 1.64697000  
C 0.87514500 -2.23706700 2.24257300  
C 1.59483300 -0.89802300 2.49765400  
H 0.65673000 -2.75630300 3.19267000  
H 2.64956800 -0.94951500 2.18162500  
H -2.27511100 0.62910900 1.29673700  
K 4.16064500 -0.93313100 -0.01350200  
O 4.44010900 0.68405500 2.35694900  
O 5.04467200 -3.54928800 0.35177200  
O 4.45705800 1.71187200 -0.29251000  
C 5.19052000 0.11769800 3.40398100  
C 4.68888600 2.04617200 2.10709200  
C 5.22101300 -4.39067800 -0.75763500  
C 5.88162800 -3.85661000 1.43549600  
C 5.68736600 2.12936600 -0.82167400  
C 3.98650100 2.42778400 0.82503900  
C 6.45001600 -0.54642300 2.88273100  
H 4.54121100 -0.62231300 3.90391800  
H 5.45465000 0.87864300 4.16296600  
H 4.29139200 2.67138000 2.93156800  
H 5.77734500 2.24303800 2.03857500  
C 4.44724200 -3.82781200 -1.93136500  
H 6.29998100 -4.47853000 -0.99709300  
H 4.85173100 -5.41531000 -0.54705400  
C 5.75655100 -2.78728600 2.48876800  
H 6.93597700 -3.91121300 1.09744400  
H 5.61234000 -4.83681900 1.87848700  
C 5.93102000 1.40353800 -2.12040500  
H 5.67618900 3.21953900 -1.02047800  
H 6.52082800 1.91898200 -0.12159200  
H 2.91730000 2.17821300 0.91700600  
H 4.07440700 3.51817100 0.65676000  
O 6.18270200 -1.56348000 1.94714300  
H 7.07792000 0.19264800 2.35680700  
H 7.04212900 -0.94393000 3.73197100

O 4.74223700 -2.48280100 -2.20960000  
H 4.62818900 -4.46617100 -2.81991300  
H 3.36692200 -3.85229200 -1.71139100  
H 4.70736700 -2.73042300 2.84575800  
H 6.38717600 -3.07370300 3.35408700  
O 5.94774300 0.01962600 -1.88765000  
H 5.13531400 1.65795700 -2.84896800  
H 6.89774200 1.74367700 -2.54449000  
C 6.03296900 -2.21190200 -2.69376400  
C 6.11514100 -0.75031400 -3.04959200  
H 6.80730500 -2.44340100 -1.93609100  
H 6.24611900 -2.81517700 -3.59924400  
H 7.10107000 -0.54847100 -3.51549200  
H 5.32994900 -0.50272300 -3.79288300  
C 1.55894500 -0.43561600 3.93684900  
H 2.10649500 -1.14361700 4.58437200  
H 2.02862500 0.55715300 4.02948800  
H 0.51953100 -0.36923100 4.29910700  
C 1.61716000 -3.16942000 1.30543100  
H 1.77785900 -2.67708800 0.32886800  
H 2.59349800 -3.47620900 1.71904800  
H 1.02217000 -4.07910900 1.11600000  
C -2.94129900 -1.91892500 -4.38331600  
H -3.86591900 -2.47526400 -4.15241100  
H -2.72248600 -2.05228500 -5.45768700  
H -2.11481500 -2.35958100 -3.80044800  
C -1.76534700 1.09046500 -5.61719500  
H -0.84826800 1.70003600 -5.68816600  
H -1.75217700 0.35240900 -6.43858300  
H -2.63437500 1.75740400 -5.75663500  
C -1.22711300 3.92370000 0.84347800  
C -1.20438500 3.89979900 2.24984700  
C -2.09249900 4.76208600 0.11127700  
C -2.08182700 4.75202700 2.92696300  
C -2.93343900 5.60952200 0.84115100  
C -2.93119200 5.60680900 2.23061900  
H -2.10170100 4.75317700 4.01900500  
H -3.61853100 6.27332300 0.30622700  
H -3.60581800 6.27100300 2.77937100  
C -4.40523800 -1.87602700 1.15692600  
C -5.62753000 -1.60287300 0.50430400  
C -4.28764400 -1.85800400 2.55692100  
C -6.72730600 -1.26829800 1.29869700  
C -5.41746500 -1.50504500 3.30454600  
C -6.62527000 -1.20956600 2.68536300  
H -7.68516700 -1.04702500 0.82002300  
H -5.34838400 -1.47606100 4.39608600  
H -7.49869800 -0.93998100 3.28690500  
C -3.01061300 -2.24450000 3.26916000  
C -3.20837200 -3.50932700 4.10598200  
C -2.46884800 -1.09349100 4.11482200  
H -2.25130000 -2.46129300 2.50638500  
H -3.57369900 -4.34842900 3.48811400  
H -2.25104800 -3.82049000 4.56246000  
H -3.93333700 -3.35301200 4.92537300  
H -2.25843800 -0.21239400 3.48584800  
H -3.17811200 -0.79091800 4.90665200  
H -1.52886500 -1.39306600 4.61076700  
C -5.77941100 -1.66683500 -1.00414300  
C -6.45433500 -0.41991000 -1.57509600  
C -6.53770000 -2.92650900 -1.42939000  
H -4.77309800 -1.70568600 -1.44637200  
H -5.94503400 0.50293800 -1.25234500  
H -6.41937100 -0.44794900 -2.67759700  
H -7.51615400 -0.35007100 -1.27827500  
H -6.03415400 -3.84490100 -1.08499400  
H -7.56662400 -2.92976800 -1.02547400  
H -6.60844800 -2.97565200 -2.53104100  
C -2.17133100 4.76592600 -1.40554600  
C -1.62599400 6.06577900 -2.00139300  
C -3.60102300 4.53061400 -1.89513400  
H -1.57072800 3.92354000 -1.77909800  
H -0.57300300 6.24196700 -1.72908300  
H -1.68412800 6.02999100 -3.10392300  
H -2.21559400 6.93768100 -1.66369700  
H -4.01997900 3.61664600 -1.44856300  
H -4.26309000 5.38470800 -1.66340400  
H -3.59971800 4.39809200 -2.99152000  
C -0.24187200 3.00563600 3.00681000  
C -0.78194300 2.56071200 4.36231100  
C 1.11598700 3.69517400 3.16695900  
H -0.08169600 2.09813000 2.40404700  
H -1.78548500 2.11096800 4.27009000  
H -0.11233300 1.80475900 4.80480400  
H -0.84463100 3.39608500 5.08207700  
H 1.54842000 3.97607500 2.19151200  
H 1.02334200 4.61614900 3.77103000  
H 1.83051500 3.02390100 3.67755800

**<sup>1</sup>LCoW(PMe<sub>3</sub>)<sub>3</sub>**

C -0.14222200 -1.08338300 -0.58201900  
C -1.33523200 -0.50188200 -1.05188300  
C -1.29367200 0.60178500 -1.95682500  
C -0.03653400 0.99143600 -2.51179500  
C 1.17698700 0.35112800 -2.08790800  
C 1.10009300 -0.71369300 -1.15559800  
H -2.19806800 1.10978300 -2.29674700  
H 0.00251500 1.80102200 -3.24332000  
H 2.12486000 0.65870400 -2.53266600  
C 3.45860800 -1.68703000 -0.90373200  
C 1.61639600 -2.72889800 -0.03518800  
C 3.88036900 -2.84285500 -0.21057500  
C 4.38926500 -0.87134600 -1.54898600  
C 5.22235800 -3.20385100 -0.13293300  
C 5.73527100 -1.23348500 -1.46903200  
H 4.08522400 0.01564600 -2.10503900  
C 6.14833000 -2.37723700 -0.77262100  
H 5.53954800 -4.09881600 0.40812800  
H 6.48314800 -0.60770700 -1.96476200  
H 7.21196100 -2.62921100 -0.73169200  
C -3.80193000 -1.19339100 -0.83745200  
C -2.11822200 -2.37773400 0.15679100  
C -4.36917500 -2.27800600 -0.13232500  
C -4.61518300 -0.35287600 -1.60097900  
C -5.73864000 -2.52545100 -0.13547000  
C -5.98806200 -0.60296300 -1.60622000  
H -4.20132400 0.46471400 -2.19187900  
C -6.54597800 -1.66456700 -0.88087600  
H -6.16424100 -3.36661400 0.41737300  
H -6.64168000 0.04549200 -2.19706000  
H -7.62705900 -1.82855900 -0.90808500  
N -2.44633300 -1.26302900 -0.60018500  
N -3.31818600 -2.95482100 0.45687400  
N 2.08969800 -1.64678300 -0.76262300  
N 2.73910300 -3.43449400 0.29627300  
C 2.73481000 -4.63905200 1.07929400  
H 3.20307300 -5.47076900 0.52391500  
H 3.27593200 -4.49364100 2.03105400  
H 1.68908200 -4.90148800 1.29963400  
C -3.46986800 -4.14860600 1.24189700  
H -4.05875000 -3.94850900 2.15441200  
H -3.97061100 -4.94135000 0.65850300  
H -2.46799000 -4.49845400 1.53288100

Co -0.24792600 -2.68031600 0.35361400  
W 0.09508000 1.19213900 -0.22914600  
P 0.56337900 0.71721400 2.10998400  
P -1.60614200 2.77264900 0.42875000  
P 1.76710400 2.93272500 -0.23509600  
C 1.83916800 -0.57123200 2.46138900  
H 2.79265600 -0.29692700 1.97831200  
H 2.00460300 -0.70395500 3.54635400  
H 1.49234300 -1.52485800 2.02653400  
C -0.84394300 -0.01053500 3.06060500  
H -1.20427400 -0.89018700 2.49752300  
H -0.55181300 -0.32046500 4.08179500  
H -1.67232500 0.71506300 3.12997600  
C 1.14572000 1.97675500 3.33907600  
H 0.47259000 2.84677000 3.35189600  
H 1.19913100 1.55090000 4.35801000  
H 2.15340300 2.32580700 3.05732000  
C -3.32102600 2.10018800 0.58607100  
H -3.32494900 1.27069800 1.31282700  
H -4.04249300 2.87157100 0.91324000  
H -3.65628500 1.69759900 -0.38064300  
C -1.61834000 3.77764600 1.98731200  
H -1.71882500 3.10361800 2.85483400  
H -0.68341600 4.34739600 2.09802100  
H -2.46857000 4.48427100 1.99797400  
C -1.93202600 4.13264600 -0.78607400  
H -2.07926600 3.69067300 -1.78608000  
H -2.82212500 4.73379500 -0.52084000  
H -1.05725600 4.80290200 -0.84437300  
C 1.68673300 4.50125900 0.74919300  
H 2.58631000 5.12370400 0.58773800  
H 0.80103200 5.08730100 0.45166100  
H 1.60569800 4.26955500 1.82247700  
C 2.08593200 3.71244900 -1.88574400  
H 1.15748600 4.18969000 -2.24390200  
H 2.88597000 4.47396200 -1.83729300  
H 2.37802600 2.94438400 -2.62046500  
C 3.49407600 2.43690100 0.20738300  
H 4.22875500 3.23473500 -0.00967200  
H 3.54651900 2.19672500 1.28270100  
H 3.77005900 1.52556500 -0.34696800

**<sup>1</sup>TS4K**

C 0.22437800 0.77629700 -1.53407200  
C -0.95802800 0.99251900 -2.24092800

C -1.03700500 0.80262800 -3.62192500  
 C 0.11923100 0.39065700 -4.29628300  
 C 1.33359900 0.19069700 -3.62714400  
 C 1.36113500 0.39705300 -2.24794600  
 H -1.94851600 1.00235000 -4.18759600  
 H 0.07918600 0.24468500 -5.37947400  
 H 2.22204400 -0.08590700 -4.19637500  
 C 3.77974700 -0.04629100 -1.51989500  
 C 2.20978100 0.81203500 -0.09980500  
 C 4.37578800 0.18783600 -0.26677100  
 C 4.51782900 -0.60262500 -2.56572900  
 C 5.70907900 -0.12431800 -0.01560700  
 C 5.85361500 -0.91454200 -2.31475200  
 H 4.08208200 -0.79695200 -3.54595200  
 C 6.44171400 -0.68081900 -1.06279200  
 H 6.16194000 0.05528200 0.96210900  
 H 6.45621700 -1.35040100 -3.11663900  
 H 7.49312300 -0.93741100 -0.90588700  
 C -3.30208200 1.71658600 -1.49912800  
 C -1.51577800 1.70675800 -0.07489000  
 C -3.72785500 2.15651900 -0.23252100  
 C -4.21433900 1.58156400 -2.54620200  
 C -5.05526700 2.48571100 0.02774600  
 C -5.54543400 1.90625500 -2.28606000  
 H -3.91425200 1.23540600 -3.53544100  
 C -5.96168800 2.35374700 -1.02317200  
 H -5.37337600 2.83545900 1.01262800  
 H -6.28066100 1.81436800 -3.09059800  
 H -7.01318000 2.60693200 -0.86136500  
 N -1.95065100 1.46502500 -1.36020600  
 N -2.61526900 2.12718200 0.59639800  
 N 2.46315500 0.34872800 -1.37299000  
 N 3.38899400 0.71318300 0.55500300  
 C 3.64328200 1.16362600 1.90116000  
 H 2.82397700 1.83089100 2.19715700  
 H 3.71528600 0.31034200 2.59782400  
 H 4.58691500 1.73155400 1.92331600  
 C -2.66970600 2.52135500 1.98142200  
 H -1.70054900 2.31271500 2.44644500  
 H -2.88008200 3.60047800 2.06597500  
 H -3.46009400 1.95837600 2.50614200  
 Co 0.36426100 1.33079400 0.23199400  
 H -0.09411600 4.54101600 1.79657500  
 C 0.05001600 -0.66292300 3.32562700  
 C 0.29853400 0.19996700 4.56271300  
 H -1.02512000 -0.88368300 3.19080100  
 H 0.61464500 -1.60795800 3.32713000  
 H -0.47426300 0.06365600 5.33762500  
 H 1.28465400 -0.01567200 5.01640600  
 B 0.51872800 1.49387300 2.71511200  
 O 0.50372000 0.15374500 2.24972900  
 O 0.27904500 1.52718000 4.08143500  
 N 0.67358500 2.58330700 1.86553700  
 C 0.47175300 3.89100600 2.48419600  
 C 1.77699500 4.56896600 2.87866400  
 H 2.45147300 4.66766400 2.01236700  
 H 1.58602400 5.57613500 3.29261100  
 H 2.30316300 3.98197000 3.65251400  
 B 0.93672400 3.09595700 -0.03134600  
 O 2.25404100 3.51232000 -0.24344900  
 O 0.05106300 4.10173700 -0.41890600  
 C 2.22602000 4.73202600 -0.95550200  
 C 0.79860400 5.25260200 -0.76085500  
 H 2.99301400 5.42125800 -0.56220200  
 H 2.44907100 4.54146100 -2.02277300  
 H 0.74043100 5.99389000 0.06006100  
 H 0.38125900 5.71592900 -1.67059200  
 H -0.15258100 3.78737200 3.39128600  
 K -0.54275400 -1.85367600 0.33185000  
 O -0.98788100 -3.97656600 2.10961200  
 O 1.61503300 -3.15364300 1.58584900  
 O -1.15631600 -3.49056200 -1.90103100  
 O -3.00231000 -1.47083700 -0.94463400  
 O 1.48800800 -2.87298600 -1.17850300  
 O -2.90139500 -1.96240100 1.84698900  
 C 0.11904300 -4.59679800 2.70828000  
 C -2.12188800 -3.92176200 2.93123400  
 C 1.29761600 -4.50743300 1.77452800  
 C 2.76314800 -2.88304400 0.81988900  
 C -2.50024300 -3.40751500 -2.30575300  
 C -0.22130300 -2.98619600 -2.82623600  
 C -3.05938500 -1.99781100 -2.25098500  
 C -4.18803900 -1.59202700 -0.20287300  
 C 2.67117500 -3.36724700 -0.61190100  
 C 1.16025400 -3.43101100 -2.42325900  
 C -3.25394500 -3.28298600 2.17111100  
 C -3.90727900 -1.19644500 1.22933700  
 H -0.09598800 -5.66445300 2.91859200



|                                       |                                       |
|---------------------------------------|---------------------------------------|
| H -1.90685100 -3.33896300 3.85075400  | C 2.74216500 -2.55992900 -1.66368300  |
| H -2.43344000 -4.93995900 3.24192200  | C 2.01964400 -0.77006100 -0.41809400  |
| H 1.03565100 -4.99811800 0.81645500   | C 3.61791400 -2.38609000 -0.57653100  |
| H 2.15278100 -5.05579700 2.21959000   | C 2.93711200 -3.59803400 -2.57438800  |
| H 3.66719100 -3.32225900 1.28887100   | C 4.70932100 -3.22356700 -0.36991000  |
| H 2.86784000 -1.78725200 0.83596800   | C 4.02950400 -4.44185600 -2.36646300  |
| H -3.06317200 -4.06581100 -1.62204400 | H 2.27275400 -3.75333900 -3.42481800  |
| H -2.62203800 -3.80909000 -3.33311100 | C 4.90264900 -4.25862700 -1.28544300  |
| H -0.25477500 -1.88111500 -2.87731100 | H 5.38701000 -3.06665300 0.47215700   |
| H -0.43263100 -3.37741900 -3.84190600 | H 4.20899900 -5.26092700 -3.06868800  |
| H -2.47056600 -1.32408200 -2.89575100 | H 5.75210400 -4.93563100 -1.15865400  |
| H -4.09737300 -1.99453600 -2.63412700 | N 1.78711800 -1.56810300 -1.53001900  |
| H -4.97173600 -0.91757600 -0.60417500 | N 3.14921200 -1.29433700 0.14730500   |
| H -4.58373500 -2.62599100 -0.25556400 | N -1.53271600 1.51379700 -1.45666200  |
| H 2.67725100 -4.47534400 -0.65674300  | N -1.37662700 2.77057100 0.31403000   |
| H 3.56430100 -3.01214200 -1.16431600  | Co 0.86877000 0.74055500 -0.21200200  |
| H 1.18812400 -4.53804100 -2.36147800  | H 1.99333200 1.89804300 -0.54220800   |
| H 1.88172700 -3.11296800 -3.20249700  | C 1.55516200 2.88445600 -3.77048500   |
| H -4.16507100 -3.29862900 2.80272000  | C 2.38972700 1.60222900 -3.95356800   |
| H -3.45940300 -3.88064200 1.26118100  | H 2.22602100 3.76694100 -3.79122600   |
| H -3.54146700 -0.15852000 1.24750100  | H 1.76675300 0.83072700 -4.44914300   |
| H -4.84964100 -1.24172700 1.81129300  | B 1.69962700 1.75031200 -1.79856400   |
| H 0.36413300 -4.10509300 3.67184300   | O 1.03206000 2.77277200 -2.45360100   |
| <b><sup>12</sup>K<sub>Dipp</sub></b>  | O 2.64529200 1.16611400 -2.62639100   |
| C 0.07548900 -0.07677800 -1.68180100  | N 1.29184700 1.12455800 1.60845600    |
| C 0.68215800 -1.17761300 -2.29899100  | C 1.63022500 1.44592300 2.66520700    |
| C 0.20495500 -1.70078300 -3.49918000  | C 2.06481300 1.84477500 3.98601900    |
| C -0.90928600 -1.08642500 -4.08965100 | H 1.23242900 1.76131100 4.70379800    |
| C -1.56318800 -0.00092800 -3.48836000 | H 2.89742000 1.19843300 4.30945400    |
| C -1.06910100 0.47273200 -2.27243800  | H 2.40798400 2.89216800 3.96731500    |
| H 0.67779100 -2.54947100 -3.99541800  | K -2.25189400 -1.78379900 0.10848700  |
| H -1.27755700 -1.46299300 -5.04837300 | O -3.12128400 -3.09478500 2.48015700  |
| H -2.41413100 0.46256000 -3.99034600  | O -0.51942600 -3.44249500 1.48083400  |
| C -2.60877500 2.37960500 -1.52155400  | O -3.95932200 -3.23957300 -1.63085000 |
| C -0.74651400 1.74515800 -0.33530300  | O -4.33203200 -0.35137300 -1.09307700 |
| C -2.51283200 3.18553800 -0.37264800  | O -1.31435900 -4.01822300 -1.15856000 |
| C -3.66361600 2.54673200 -2.41738300  | O -5.19546900 -1.84328200 1.04571700  |
| C -3.45943300 4.16077100 -0.07367600  | C -2.04903700 -3.49308400 3.29509700  |
| C -4.60968200 3.53046700 -2.12638600  | C -4.24011700 -2.60355900 3.16904700  |
| H -3.75935300 1.93411900 -3.31394700  | C -1.07069600 -4.27936300 2.46192700  |
| C -4.51333000 4.32350100 -0.97379400  | C 0.32476500 -4.07695000 0.54964900   |
| H -3.37093300 4.77341400 0.82669800   | C -5.06886800 -2.47750300 -2.04272100 |
| H -5.44429400 3.68548700 -2.81615800  | C -3.11708900 -3.67538200 -2.66776300 |
| H -5.27271200 5.08625900 -0.77945500  | C -4.73359000 -1.01541500 -2.27057500 |

C -5.37262600 0.11028300 -0.26217400  
C -0.42035300 -4.87205800 -0.49948600  
C -2.12121200 -4.65752600 -2.11047300  
C -5.41910300 -2.57259800 2.22015400  
C -5.23615600 -0.44700200 1.13701500  
H -2.40847900 -4.14321400 4.11802000  
H -4.03148400 -1.60082800 3.59636300  
H -4.50143500 -3.26810400 4.01790200  
H -1.60523200 -5.13539900 2.00635600  
H -0.27521900 -4.68450200 3.11992600  
H 1.05380700 -4.73743000 1.05856500  
H 0.88236300 -3.26862800 0.05491000  
H -5.81699300 -2.56954400 -1.23989900  
H -5.50292800 -2.89932500 -2.97250500  
H -2.57593000 -2.82961900 -3.13649500  
H -3.70505800 -4.18589600 -3.45785100  
H -3.89024100 -0.92451100 -2.97323700  
H -5.60194900 -0.50247400 -2.72918900  
H -5.34523800 1.21575800 -0.22160100  
H -6.35424500 -0.18942600 -0.67139000  
H -0.96848300 -5.72536800 -0.04953600  
H 0.32231200 -5.29677100 -1.20630400  
H -2.65942900 -5.50785600 -1.64412600  
H -1.50513800 -5.05512300 -2.94276800  
H -6.30816400 -2.19062800 2.76234900  
H -5.63255500 -3.60298000 1.89154700  
H -4.32259100 -0.04485600 1.61851100  
H -6.10114900 -0.10608000 1.74281400  
H -1.55014100 -2.61269100 3.74855800  
C 3.87432700 -0.75909700 1.25518900  
C 3.66916900 -1.30240700 2.53586800  
C 4.83547900 0.23904300 1.00753000  
C 4.46866700 -0.82897300 3.58194800  
C 5.59889100 0.69006300 2.08970000  
C 5.42672400 0.15650000 3.36298700  
H 4.34236200 -1.24519500 4.58616400  
H 6.35572200 1.46260300 1.92736300  
H 6.04659900 0.51077700 4.19244500  
C -0.93683000 3.38611900 1.52179500  
C -0.00182100 4.43107300 1.45115000  
C -1.49323300 2.94843600 2.73772700  
C 0.38095000 5.03975000 2.65272700  
C -1.07983800 3.58527500 3.91068300  
C -0.15159100 4.62382000 3.86816700  
H 1.10350800 5.86054700 2.63274400  
H -1.49126800 3.27224800 4.87390100  
H 0.15544800 5.11737100 4.79556700  
C -2.47167600 1.79026100 2.76863000  
C -3.54016100 1.92761600 3.84841800  
C -1.72125600 0.46172800 2.89500000  
H -2.98859600 1.78001500 1.79398300  
H -4.05783900 2.90060000 3.78604400  
H -4.30047500 1.13424100 3.73507300  
H -3.12109500 1.82961400 4.86516900  
H -1.00343800 0.32592400 2.06824800  
H -1.15873600 0.41495800 3.84509500  
H -2.42890200 -0.38593000 2.89501400  
C 0.55271300 4.91143200 0.12684100  
C 2.07121000 5.06111800 0.15667500  
C -0.12650000 6.21345900 -0.30301100  
H 0.32574600 4.15116200 -0.63485700  
H 2.55286800 4.13774400 0.51964500  
H 2.45139300 5.25837700 -0.86063700  
H 2.39840000 5.89766200 0.80039200  
H -1.22054000 6.09052700 -0.38304700  
H 0.07270300 7.02875100 0.41673100  
H 0.24871800 6.53386600 -1.29150300  
C 2.63629100 -2.37950200 2.80006300  
C 1.60781900 -1.93941600 3.84136100  
C 3.30088000 -3.69771200 3.19983500  
H 2.08831100 -2.54821800 1.86233500  
H 1.03364600 -1.06866400 3.48402000  
H 0.89173000 -2.75523600 4.03869000  
H 2.08179600 -1.67858600 4.80480600  
H 4.01487200 -4.03880600 2.43077500  
H 3.85169800 -3.60149700 4.15292700  
H 2.54319200 -4.49110300 3.33318900  
C 5.08342900 0.78431000 -0.38406100  
C 6.36494300 0.19491000 -0.97755900  
C 5.11679600 2.30983100 -0.41169200  
H 4.24790300 0.47696900 -1.02906800  
H 6.32752000 -0.90761800 -1.00905100  
H 6.50703700 0.55618800 -2.01186200  
H 7.25368300 0.48888800 -0.38939800  
H 4.20323800 2.73455400 0.03624100  
H 5.98973200 2.72041100 0.12725000  
H 5.17380900 2.66485900 -1.45502100  
C 3.67872200 1.78129000 -4.71845700

H 4.32060300 2.53640100 -4.23119400  
H 4.23542300 0.82965500 -4.76299800  
H 3.47643100 2.10899600 -5.75331600  
C 0.44607700 3.06921300 -4.77824100  
H 0.85830700 3.16815900 -5.79802500  
H -0.24006900 2.20489300 -4.75663200  
H -0.13297900 3.98087000 -4.55189200  
**<sup>1</sup>TS2**  
C 0.00574700 -1.30842200 -0.36772700  
C -1.19013800 -1.99607100 -0.17052100  
C -1.21663500 -3.34843400 0.17030200  
C 0.00953400 -4.00680500 0.33148900  
C 1.23371500 -3.34298700 0.17782900  
C 1.20344800 -1.99084600 -0.16376400  
H -2.14774500 -3.89727400 0.32172700  
H 0.01109700 -5.06828400 0.59619100  
H 2.16624700 -3.88768400 0.33527100  
C 3.65278300 -1.21156000 -0.26637300  
C 1.89858200 0.20616600 -0.60315700  
C 4.15188700 0.07904500 -0.53245100  
C 4.52304900 -2.27443000 -0.02302800  
C 5.51776400 0.34775000 -0.55359000  
C 5.89083800 -2.00484900 -0.04661200  
H 4.16008900 -3.28248000 0.17846400  
C 6.38256700 -0.71705900 -0.30540000  
H 5.89700000 1.35310600 -0.75092700  
H 6.59543300 -2.81980500 0.14276800  
H 7.46256400 -0.54407000 -0.31127900  
C -3.64141400 -1.22373100 -0.27801800  
C -1.89051000 0.19843900 -0.61254100  
C -4.14336600 0.06614600 -0.54233700  
C -4.50919800 -2.28861000 -0.03489900  
C -5.50979300 0.33202800 -0.56203400  
C -5.87759200 -2.02182500 -0.05686200  
H -4.14383300 -3.29599000 0.16564100  
C -6.37218700 -0.73482200 -0.31400300  
H -5.89123800 1.33684600 -0.75788200  
H -6.58032500 -2.83835200 0.13268300  
H -7.45254100 -0.56401400 -0.31853100  
N -2.26694000 -1.09932300 -0.33966100  
N -3.04646100 0.88669300 -0.75230400  
N 2.27794700 -1.09013200 -0.32790400  
N 3.05301900 0.89682800 -0.74360500  
C 3.14977100 2.30223100 -1.04381900

H 3.93710200 2.46626300 -1.79800700  
H 2.18169700 2.63662600 -1.43895000  
H 3.38811700 2.88070200 -0.13446500  
C -3.14589200 2.29343100 -1.04435100  
H -2.17689900 2.63288800 -1.43303900  
H -3.93065600 2.46042900 -1.80059600  
H -3.38944000 2.86527000 -0.13213600  
Co 0.00186800 0.53847300 -0.62665600  
H 0.01819300 3.67526400 1.04024700  
C 0.71974200 1.28053700 3.32017000  
C -0.79343200 1.52816800 3.25990200  
H 0.96263000 0.33937400 3.84860000  
H 1.27020500 2.10104700 3.81218300  
H -1.35390800 0.93720100 4.00464200  
H -1.04520300 2.59548800 3.41091000  
B -0.01742900 0.99591200 1.18800300  
O 1.11584500 1.17375400 1.96681500  
O -1.16525300 1.13890000 1.95213900  
N 0.00173900 2.36417300 -0.57481500  
C 0.00667900 3.51276500 -0.06560300  
C 0.00282000 4.79080800 -0.86227200  
H -0.88253000 5.40694600 -0.61196200  
H 0.89264200 5.40500200 -0.62331200  
H -0.00443300 4.57586600 -1.94413200  
**<sup>13</sup>W<sub>Co</sub>**  
C 0.00676800 0.18039600 -0.63741600  
C 1.22270600 -0.37910000 -1.08135800  
C 1.24715100 -1.43223800 -2.03056800  
C -0.00636800 -1.94048200 -2.46942200  
C -1.25513800 -1.40890000 -2.03884500  
C -1.21763500 -0.36148600 -1.08617400  
H 2.17071900 -1.86002400 -2.41680400  
H -0.01148600 -2.76839900 -3.18154800  
H -2.18373000 -1.81817500 -2.43307100  
C -3.64986800 0.26166000 -0.53224400  
C -1.85338600 1.40433900 0.29954400  
C -4.10623900 1.31095600 0.28892900  
C -4.54535600 -0.61495600 -1.13895700  
C -5.46189200 1.52543100 0.51459500  
C -5.90490700 -0.40027600 -0.91068400  
H -4.21021500 -1.44770200 -1.75841200  
C -6.35695600 0.65166700 -0.10254400  
H -5.80990000 2.33947900 1.15461100  
H -6.63252400 -1.07523400 -1.36993200

H -7.43093600 0.78574100 0.05448900  
C 3.66337000 0.21503900 -0.53124200  
C 1.88178700 1.38103400 0.29967000  
C 4.13350000 1.26249600 0.28460800  
C 4.54805800 -0.67220900 -1.13851800  
C 5.49205200 1.46416100 0.50471200  
C 5.91050000 -0.47006100 -0.91631000  
H 4.20263300 -1.50319000 -1.75468100  
C 6.37612000 0.57981000 -0.11312600  
H 5.85036000 2.27693800 1.14067700  
H 6.62966200 -1.15323600 -1.37672400  
H 7.45198300 0.70396400 0.03908100  
N 2.28226500 0.33362500 -0.51010200  
N 3.01717500 1.93888900 0.76225200  
N -2.26751800 0.36555800 -0.51501500  
N -2.98129900 1.97308600 0.76655800  
C -3.01144200 3.10246500 1.66251600  
H -3.56683000 3.93839700 1.20448900  
H -3.49108200 2.82148800 2.61529200  
H -1.97293700 3.40485000 1.85678100  
C 3.06204700 3.07086300 1.65422200  
H 3.53322000 2.78625700 2.61015900  
H 3.63307400 3.89587300 1.19549600  
H 2.02789000 3.39111000 1.84331500  
Co 0.01504800 1.58382300 0.52754800  
H 0.01980500 2.36353600 4.27611400  
C 0.11300400 4.68898200 -2.15559000  
C -0.06602900 3.54577100 -3.16280900  
H -0.63655100 5.48947300 -2.27540400  
H 1.11744200 5.14733400 -2.22021300  
H -1.06597300 3.55830400 -3.63461900  
H 0.69102000 3.55598300 -3.96493900  
B 0.01453900 2.70041600 -1.05330700  
O -0.03853400 4.07215100 -0.88611000  
O 0.06810800 2.36463600 -2.38943000  
N 0.01735800 1.82772900 2.29333700  
C 0.02034400 1.54795300 3.51365400  
C 0.02197500 0.15010600 4.07013000  
H 0.06767700 -0.58124000 3.24693200  
H 0.88605400 -0.00532600 4.74330500  
H -0.89152700 -0.03640300 4.66610900  
W -0.02001700 -2.21783100 -0.12640800  
C -0.09809500 -4.18209800 -0.25785600  
O -0.14617400 -5.33448000 -0.38314200

C 1.35865400 -2.42308700 1.26698900  
O 2.19593800 -2.49043200 2.06665600  
C -1.36452700 -2.32735500 1.31065700  
O -2.18091900 -2.33851200 2.13425900  
**<sup>16</sup>W<sub>Co</sub>**  
C 0.08323600 -0.31547700 -0.80476400  
C -1.10047700 -0.97024600 -1.18192800  
C -1.08164300 -2.21412700 -1.86835900  
C 0.18879000 -2.79806400 -2.11684000  
C 1.41521400 -2.16032800 -1.76592500  
C 1.32585700 -0.92672100 -1.07966700  
H -1.98360500 -2.72947100 -2.19228600  
H 0.22962600 -3.76370300 -2.62488600  
H 2.36154300 -2.63366900 -2.02070300  
C 3.73730000 -0.18370800 -0.64003100  
C 1.93273200 1.14007000 -0.15007400  
C 4.18678500 1.03956100 -0.11256100  
C 4.63879700 -1.18698600 -0.99002500  
C 5.54034500 1.31131400 0.05937600  
C 5.99540700 -0.91664100 -0.81360000  
H 4.31199700 -2.15449800 -1.37161700  
C 6.44083400 0.31122400 -0.30369100  
H 5.88179700 2.26615600 0.46514700  
H 6.72711300 -1.68591700 -1.07581100  
H 7.51362300 0.48501500 -0.18132300  
C -3.57103200 -0.37079800 -0.92899400  
C -1.89376700 1.04298600 -0.26506700  
C -4.13811300 0.79491300 -0.38713300  
C -4.37879400 -1.41096200 -1.38585700  
C -5.51529700 0.97205800 -0.29848500  
C -5.75885000 -1.23592700 -1.29564300  
H -3.96482600 -2.33434200 -1.79056700  
C -6.32014800 -0.06526400 -0.76567300  
H -5.94655200 1.88328800 0.12197500  
H -6.41760000 -2.03619900 -1.64432200  
H -7.40797100 0.03345900 -0.71265800  
N -2.20298300 -0.17556900 -0.84187500  
N -3.08412200 1.61168200 0.00559700  
N 2.35608700 -0.07487400 -0.66175700  
N 3.05775100 1.79858400 0.17189100  
C 3.10686100 3.12869100 0.72807000  
H 2.07673200 3.39726200 1.00489500  
H 3.75069500 3.13260300 1.62301400  
H 3.50496600 3.83810800 -0.01642500

C -3.27916000 2.89912600 0.62767400  
H -2.29471200 3.26630500 0.94191200  
H -3.74250100 3.60207900 -0.08475300  
H -3.92950900 2.79223400 1.51129700  
Co 0.01703300 1.36864600 -0.02340600  
H 0.71615800 4.74120600 -0.16707900  
C -0.68667500 0.57763100 3.22775800  
C -0.79038800 1.75931400 4.19662500  
H -1.68498000 0.23150500 2.90112900  
H -0.13569500 -0.28259300 3.63962800  
H -1.70902300 1.72950000 4.80684100  
H 0.07950300 1.79322600 4.88066800  
B -0.26151400 2.54228900 2.13948500  
O 0.01537800 1.13857200 2.13850800  
O -0.79459800 2.91013500 3.37018300  
N -0.05309300 3.13475600 0.91967400  
C -0.16361200 4.48108900 0.45707800  
C -0.30711700 5.52036000 1.56114900  
H 0.55643700 5.48745700 2.24947900  
H -0.36798500 6.53944300 1.13714200  
H -1.21204300 5.34363300 2.16802000  
B 0.07988100 2.08693500 -1.78316600  
O 1.03493900 3.00033300 -2.19340600  
O -0.80736800 1.81530200 -2.81104600  
C 0.67571600 3.48225400 -3.47664800  
C -0.35679500 2.47130200 -3.98353700  
H 0.24781500 4.49757300 -3.37708000  
H 1.56982400 3.54665900 -4.11916800  
H -1.20750900 2.94448100 -4.50202000  
H 0.09251700 1.72631100 -4.66695200  
H -1.02659500 4.58633900 -0.23973600  
W 0.08698000 -2.52740400 0.21954100  
C -1.42503700 -2.52515600 1.48319400  
O -2.34534500 -2.48721000 2.18868200  
C 1.28834400 -2.19303900 1.74935000  
O 2.02061400 -1.95611600 2.61577700  
C 0.29623500 -4.45552000 0.57879200  
O 0.42559800 -5.59535400 0.74860900  
**'TSIK**  
C -0.04545300 -1.08058000 -1.00950700  
C -1.23474800 -0.83081900 -1.69050900  
C -1.23571700 -0.43635800 -3.02931300  
C -0.00033000 -0.33510400 -3.68228100  
C 1.21166700 -0.61648100 -3.03644800

C 1.16519000 -0.98551500 -1.69164700  
H -2.15441400 -0.21791300 -3.57560900  
H 0.01740300 -0.04445400 -4.73667500  
H 2.14721600 -0.56093800 -3.59496700  
C 3.59088900 -1.33970700 -0.93518300  
C 1.81051600 -1.73915500 0.43092400  
C 4.06551900 -1.78137500 0.31400100  
C 4.47890800 -0.98471700 -1.94945300  
C 5.42649700 -1.88190900 0.58867300  
C 5.84241500 -1.08510000 -1.67518400  
H 4.13358200 -0.63559100 -2.92277500  
C 6.31085400 -1.52647000 -0.42892300  
H 5.78936700 -2.21936300 1.56229700  
H 6.56206500 -0.81377200 -2.45268600  
H 7.38781700 -1.59211000 -0.25081900  
C -3.69381900 -1.03629700 -0.97900300  
C -1.96560200 -1.48212300 0.44325500  
C -4.21594800 -1.44244700 0.26290000  
C -4.54151400 -0.70077800 -2.03436300  
C -5.58625500 -1.51201600 0.49467600  
C -5.91483500 -0.77549400 -1.80359500  
H -4.15896000 -0.39119300 -3.00721400  
C -6.43057800 -1.17043200 -0.56089600  
H -5.98572200 -1.82108400 1.46341500  
H -6.60400700 -0.52094900 -2.61369800  
H -7.51368900 -1.21493800 -0.41698200  
N -2.31871400 -1.05259700 -0.81947200  
N -3.13010400 -1.71494500 1.08393300  
N 2.21294800 -1.33321400 -0.82076600  
N 2.94734000 -2.02389700 1.10278000  
C 3.00785900 -2.56723300 2.43499400  
H 3.79483200 -3.33672800 2.48298000  
H 3.22342900 -1.78220700 3.18091300  
H 2.04397800 -3.04177800 2.66071600  
C -3.24920300 -2.24910900 2.41526100  
H -3.45226400 -1.45175900 3.15157000  
H -4.06792300 -2.98556100 2.44435700  
H -2.31141900 -2.76078200 2.66804400  
Co -0.07921300 -1.65345800 0.76755300  
H -0.13741100 -2.52946600 2.02895400  
C 0.37033100 -5.45102200 -0.83967700  
C -1.12433200 -5.20636600 -1.07954900  
H 0.91728300 -5.70530300 -1.76288100  
H 0.54898200 -6.25526200 -0.10198700

H -1.34972300 -5.02556700 -2.14659300  
H -1.75929200 -6.03779700 -0.73023200  
B -0.22349600 -3.41814400 0.00937400  
O 0.85236700 -4.22357000 -0.31836500  
O -1.41438700 -4.03248500 -0.33943200  
N 0.09899800 -0.03260200 2.05897200  
C -0.00733900 -1.03397900 2.72624800  
C -0.05778000 -1.44588600 4.14919000  
H 0.06332900 -0.56407800 4.80029600  
H -1.02073700 -1.93183300 4.37738900  
H 0.73726200 -2.17570400 4.37371800  
K 0.03187900 1.96769000 0.13267100  
O -0.59517400 3.25090200 2.53019800  
O -2.65280100 2.21014100 0.85207000  
O 1.02226700 3.86636300 -1.70893500  
O 2.69780400 1.71218600 -0.66445700  
O -1.71791400 3.16955700 -1.65066200  
O 2.13733500 3.21639200 1.62526000  
C -1.82030600 2.76465000 3.00732500  
C 0.47514100 3.07702000 3.42046600  
C -2.89012800 3.01571300 1.97723900  
C -3.49170600 2.46005300 -0.24865700  
C 2.41733100 3.79488700 -1.87520800  
C 0.25677200 3.68418300 -2.87202900  
C 2.94377500 2.37103000 -1.88314600  
C 3.64832400 1.93263300 0.35151600  
C -2.97328600 3.55301500 -1.15503400  
C -1.16933700 4.06980000 -2.57576500  
C 1.70194400 3.75197500 2.84760500  
C 2.95593000 2.07534800 1.68473700  
H -2.10421700 3.28375100 3.94635900  
H 0.65587700 1.99691100 3.59246800  
H 0.24622900 3.54757200 4.40021800  
H -2.88781600 4.09154100 1.71085600  
H -3.87882300 2.77617300 2.41934300  
H -4.51833800 2.70924400 0.08332600  
H -3.54562300 1.52059000 -0.81966400  
H 2.85140500 4.34874200 -1.02621800  
H 2.72393700 4.30877000 -2.80931200  
H 0.29109300 2.63334900 -3.22647800  
H 0.63279000 4.33211400 -3.68974600  
H 2.43733600 1.77961900 -2.66428900  
H 4.02533800 2.37436200 -2.12239500  
H 4.36273100 1.08702400 0.39022000

H 4.22254000 2.85677700 0.15610600  
H -2.89274700 4.52010500 -0.61653000  
H -3.69774000 3.69488100 -1.98401600  
H -1.18762800 5.10110600 -2.16883500  
H -1.75230300 4.06293000 -3.51970200  
H 2.51568400 3.72243300 3.60000700  
H 1.46048100 4.80969800 2.64772300  
H 2.36547500 1.16378900 1.91074800  
H 3.72802600 2.18620300 2.47357900  
H -1.75330200 1.67830500 3.21774700  
**5**  
C -0.02188900 -0.57687900 -0.89670200  
C -1.21622200 -1.02628600 -1.46295800  
C -1.23070700 -1.89451300 -2.55445900  
C 0.00209900 -2.30495500 -3.08339200  
C 1.22227000 -1.84901000 -2.56375700  
C 1.18372600 -0.97497500 -1.47629700  
H -2.15774900 -2.25379300 -3.00542400  
H 0.01166200 -2.98762700 -3.93831100  
H 2.15842700 -2.17210000 -3.02343300  
C 3.61525300 -0.34024700 -0.92356000  
C 1.82766900 0.50330600 0.21708800  
C 4.08153100 0.55106100 0.06513900  
C 4.51089700 -0.99939600 -1.76389300  
C 5.43751400 0.81003700 0.23737300  
C 5.87161800 -0.74170600 -1.58841200  
H 4.17347900 -1.69242200 -2.53538000  
C 6.32958200 0.14731500 -0.60678800  
H 5.78982800 1.50504600 1.00341300  
H 6.59506000 -1.24619000 -2.23556000  
H 7.40349900 0.32587600 -0.49995100  
C -3.66779500 -0.49793400 -0.88524100  
C -1.90660200 0.41241700 0.24602500  
C -4.16207100 0.37415600 0.10672100  
C -4.54210800 -1.18736800 -1.72372500  
C -5.52581100 0.58519400 0.28387700  
C -5.91027100 -0.97689800 -1.54430100  
H -4.18253500 -1.86891800 -2.49531100  
C -6.39630900 -0.10591400 -0.55980200  
H -5.89989300 1.26609600 1.05228500  
H -6.61760300 -1.50522300 -2.19020300  
H -7.47549300 0.03537100 -0.45028100  
N -2.29147500 -0.44458200 -0.76564000  
N -3.06116200 0.89287100 0.76762800

N 2.23911900 -0.33733300 -0.79848900  
N 2.96535300 1.02981500 0.72999700  
C 3.01051300 1.99841800 1.79084600  
H 3.61121400 1.62002000 2.63624800  
H 3.44338000 2.94628200 1.42864700  
H 1.98067600 2.18289600 2.12455400  
C -3.13874100 1.86528000 1.82345500  
H -3.62986900 2.78481500 1.46301700  
H -3.70127900 1.46217300 2.68367500  
H -2.11417800 2.11042300 2.13329800  
Co -0.03895500 0.59558500 0.55118600  
H -0.27116800 0.94125400 3.76811500  
C 1.22110700 -3.57289000 0.94230600  
C -0.28877700 -3.66140100 0.65946300  
H 1.82732800 -3.70033100 0.03063300  
H 1.55345600 -4.31709700 1.68993900  
H -0.51130500 -3.53377000 -0.41426000  
H -0.73520500 -4.60933800 1.00386100  
B 0.17526500 -1.72471300 1.67754700  
O 1.41694900 -2.27215000 1.47132000  
O -0.85663000 -2.57894700 1.38303100  
N -0.01325800 -0.41750600 2.27841600  
C -0.13477600 -0.12283100 3.50540500  
C -0.11156600 -1.08429000 4.64496200  
H 0.70431700 -0.82281800 5.34430900  
H -1.05464400 -1.01317500 5.21832200  
H 0.02349000 -2.12560000 4.30951800  
B -0.08467900 2.38317500 -0.19221500  
O 1.03894900 3.07727700 -0.67412700  
O -1.24862800 3.06078400 -0.59935600  
C 0.60832900 4.25528100 -1.31367900  
C -0.88819400 4.03413200 -1.54954600  
H 0.79209100 5.12965200 -0.65623500  
H 1.17220900 4.41195200 -2.25033400  
H -1.48755400 4.95107500 -1.40717500  
H -1.08500900 3.65353800 -2.57176000  
H -0.07458300 2.07565400 1.18788800  
**16K**  
C 0.43011600 -1.60734300 -1.09764100  
C 1.65353700 -1.53396200 -1.76163100  
C 1.75242700 -1.78373700 -3.13148300  
C 0.57613800 -2.09707000 -3.82503900  
C -0.67436000 -2.15085800 -3.19540700  
C -0.72490200 -1.89035000 -1.82563100

H 2.70080400 -1.76004600 -3.66875100  
H 0.63669300 -2.30936700 -4.89631700  
H -1.55899800 -2.40038700 -3.78193700  
C -3.18551900 -2.11342100 -1.15968300  
C -1.55212400 -1.64977900 0.37005500  
C -3.76681700 -2.01669800 0.11756900  
C -3.97696800 -2.36738600 -2.28113000  
C -5.13681800 -2.16085400 0.32026200  
C -5.34836700 -2.51492000 -2.07945900  
H -3.55699600 -2.45077700 -3.28330100  
C -5.92199000 -2.41284800 -0.80276800  
H -5.57659400 -2.07860600 1.31670000  
H -5.99143700 -2.71915000 -2.94019000  
H -7.00220700 -2.53744500 -0.68683600  
C 3.99248600 -0.82652500 -0.99953500  
C 2.24642800 -1.02048600 0.46104000  
C 4.41883100 -0.42832600 0.28038400  
C 4.86801100 -0.77968600 -2.08533200  
C 5.71598400 0.01603300 0.52220800  
C 6.16570500 -0.32987700 -1.84530500  
H 4.56915800 -1.08181900 -3.08892300  
C 6.58650800 0.06041500 -0.56520300  
H 6.04088300 0.31027000 1.52295000  
H 6.87456200 -0.28897600 -2.67719900  
H 7.61586500 0.39835000 -0.41694200  
N 2.66376200 -1.17618600 -0.84658600  
N 3.32538400 -0.55668000 1.12621000  
N -1.83739700 -1.88114400 -0.96246600  
N -2.73838200 -1.73741800 1.00628100  
C -2.93935200 -1.61037000 2.42869900  
H -1.94881100 -1.55133800 2.89588200  
H -3.51749200 -0.69976300 2.65880200  
H -3.47878600 -2.49385200 2.80720800  
C 3.38393300 -0.24698700 2.53463700  
H 2.35400500 -0.12998600 2.89726700  
H 3.88386800 -1.05735700 3.09051300  
H 3.94859400 0.68728300 2.68187900  
Co 0.34539000 -1.34910700 0.75665700  
H 1.83053000 -2.45874300 3.10362200  
C -1.27751900 2.11785100 3.15593500  
C -1.20466200 1.57953400 4.58790200  
H -0.54340500 2.92922800 2.99132000  
H -2.27837200 2.48574900 2.87685100  
H -0.82185300 2.32700700 5.30447400

H -2.20013000 1.24703600 4.94417500  
B -0.28054200 0.06044000 3.17978200  
O -0.93305300 1.00543700 2.34995000  
O -0.33269700 0.47800500 4.51056400  
N 0.29824700 -1.08971800 2.68393800  
C 0.91276800 -2.05136400 3.57138500  
C 0.01202200 -3.23288600 3.91688000  
H -0.34968300 -3.73489600 3.00215800  
H 0.55675900 -3.97799300 4.52627700  
H -0.86926500 -2.90703700 4.49723000  
B 0.62566100 -3.19519500 0.47596000  
O -0.37778500 -4.13479300 0.33871400  
O 1.86985700 -3.79020800 0.51340600  
C 0.22651000 -5.39662500 0.10289100  
C 1.69140400 -5.19857500 0.50835400  
H -0.28456000 -6.17325800 0.69525900  
H 0.12282600 -5.65057000 -0.96812900  
H 1.90025000 -5.59204100 1.51993800  
H 2.40032700 -5.66184400 -0.19747100  
H 1.23031100 -1.57266900 4.51986400  
K -0.49713200 1.95972300 -0.14039400  
O -1.22879200 4.61673300 0.36939200  
O -3.17543300 2.62681500 0.28998900  
O -0.00452600 2.56896900 -2.86372200  
O 2.18259300 2.01979600 -1.01086300  
O -2.35977100 1.28671800 -2.01901900  
O 1.27150600 3.67222500 1.13538800  
C -2.57943500 4.88778000 0.63336400  
C -0.33533200 5.41115000 1.10024100  
C -3.43692300 3.93161800 -0.15413900  
C -3.94992200 1.60476100 -0.28354900  
C 1.34541500 2.85986200 -3.12834500  
C -0.49905600 1.41179800 -3.49547900  
C 2.31167800 1.93391600 -2.41250900  
C 3.03501400 2.95664200 -0.40279100  
C -3.73355600 1.42944500 -1.77280200  
C -1.99989100 1.38147300 -3.37167600  
C 1.07612400 5.01046900 0.75802100  
C 2.58478600 3.18467100 1.02273600  
H -2.83572700 5.92650200 0.33999200  
H -0.50756700 5.28702300 2.18901000  
H -0.47081700 6.48493600 0.85616100  
H -3.20462200 4.04643500 -1.23109900  
H -4.50397300 4.19411600 -0.00244500

H -5.03101600 1.77066700 -0.09822500  
H -3.65356200 0.68484500 0.24481800  
H 1.50067900 3.90263500 -2.80193400  
H 1.54447100 2.81886300 -4.21934800  
H -0.07331100 0.49271300 -3.05089200  
H -0.23698300 1.41684500 -4.57292100  
H 2.10719500 0.88689300 -2.68750700  
H 3.34834900 2.15853000 -2.72748300  
H 4.07824000 2.58072300 -0.38887600  
H 3.03794000 3.91112600 -0.96525200  
H -4.12916500 2.29872200 -2.33603200  
H -4.29827700 0.53663900 -2.10893900  
H -2.42540300 2.30547400 -3.81307600  
H -2.38904900 0.51634800 -3.94541400  
H 1.77944000 5.67589500 1.29855700  
H 1.23907100 5.15234800 -0.32886200  
H 2.59114200 2.22555900 1.56386800  
H 3.30172100 3.86610200 1.52378000  
H -2.79162200 4.77954100 1.71657800  
**<sup>1</sup>TS3W<sub>PMe</sub>**  
C 0.39766700 0.32177500 -0.44997800  
C 0.76860000 -0.98939500 -0.78996000  
C 0.11773000 -1.72867500 -1.81218700  
C -0.94595500 -1.07267800 -2.50709500  
C -1.31347500 0.28745600 -2.25185300  
C -0.65078900 0.93228700 -1.17045300  
H 0.42488800 -2.73048900 -2.10715800  
H -1.43000700 -1.60496800 -3.33015300  
H -2.06291300 0.78192500 -2.86918000  
C -1.55982800 3.33621600 -1.12896500  
C 0.28950700 2.71293400 0.04233500  
C -1.09347800 4.44433300 -0.39447100  
C -2.68240500 3.44932700 -1.94864300  
C -1.72985600 5.68119200 -0.44579600  
C -3.31828200 4.68935800 -2.00328300  
H -3.05462700 2.60548300 -2.52988500  
C -2.85423300 5.78735200 -1.26394400  
H -1.36182000 6.53468400 0.12861700  
H -4.20022400 4.80567800 -2.63972800  
H -3.37993600 6.74403500 -1.33297300  
C 2.81948600 -2.40710000 -0.17191600  
C 2.56661800 -0.26013400 0.54783300  
C 3.92423400 -2.06487500 0.63077700  
C 2.75343200 -3.65897500 -0.78542600



C 4.97069800 -2.95290400 0.86433600  
 C 3.80689300 -4.54463000 -0.56284100  
 H 1.90693900 -3.94972900 -1.40700900  
 C 4.89674700 -4.20302200 0.25136300  
 H 5.81881900 -2.67762400 1.49579200  
 H 3.77750800 -5.53155800 -1.03360800  
 H 5.70263100 -4.92637800 0.40540500  
 N 1.99216500 -1.29977500 -0.14792500  
 N 3.71918200 -0.76280600 1.05799300  
 N -0.70379600 2.30125800 -0.81119200  
 N 0.02231200 4.01429800 0.30701700  
 C 0.76173500 4.85807400 1.20855700  
 H 1.23990200 5.68908900 0.66172500  
 H 0.08529600 5.26918700 1.97655300  
 H 1.52253500 4.24886100 1.70971300  
 C 4.59025900 -0.10690800 1.99770200  
 H 4.60973800 -0.67256600 2.94455200  
 H 5.61496700 -0.03661500 1.59565500  
 H 4.19695600 0.89493500 2.19925900  
 Co 1.67178600 1.42965000 0.40088100  
 H 2.79427900 3.73976900 -0.18041500  
 C 4.99427900 0.30454400 -3.48389000  
 C 3.68302900 -0.45133700 -3.74242300  
 H 5.47885800 0.65435600 -4.41223400  
 H 5.72344500 -0.32235700 -2.93348200  
 H 3.25620700 -0.20456300 -4.73407000  
 H 3.80338200 -1.54720900 -3.68587700  
 B 3.34923100 1.14083000 -2.16965500  
 O 4.61859900 1.40236400 -2.68269500  
 O 2.81353700 -0.00629000 -2.72962600  
 N 2.67494000 1.97118600 -1.26227800  
 C 3.19715000 2.71535800 -0.26938100  
 C 4.66555000 2.66291500 0.08125400  
 H 5.22758300 3.21898400 -0.69086500  
 H 4.87425400 3.12717400 1.06081200  
 H 5.04544100 1.63154000 0.07474700  
 B 1.30616700 1.40195100 2.28818700  
 O 0.47759300 2.29090400 2.97106300  
 O 1.86704400 0.51137900 3.20427900  
 C 0.34721800 1.88569000 4.31769700  
 C 1.44843800 0.83595600 4.51311600  
 H 0.45955400 2.75715100 4.98571100  
 H -0.66330300 1.46377100 4.47589000  
 H 2.30839900 1.23444900 5.08446300  
 H 1.08746500 -0.07162500 5.02759100  
 H 2.61184000 2.27914900 1.25822200  
 W -1.56534400 -1.02491800 -0.35177800  
 P -1.20059200 -2.52840500 1.52000800  
 C 0.04989200 -3.87455300 1.31558700  
 C -2.51171800 -3.59086300 2.29220300  
 C -0.50841900 -1.74780400 3.04252700  
 H 1.04626300 -3.43577600 1.16412400  
 H 0.09178700 -4.52859900 2.20607600  
 H -0.19730500 -4.48788400 0.43256900  
 H -2.82828300 -4.36439600 1.57174100  
 H -2.12171400 -4.10068000 3.19232900  
 H -3.39223200 -2.99708100 2.57733000  
 H -1.21167100 -0.98753400 3.42100000  
 H -0.30511400 -2.48459100 3.84274400  
 H 0.42511500 -1.23064100 2.76929300  
 P -3.14177700 0.27355700 0.96772700  
 C -2.54293900 1.82915600 1.77550800  
 C -4.08318300 -0.42303400 2.40720300  
 C -4.59081200 0.98432400 0.06170300  
 H -2.56085000 2.65100600 1.04223700  
 H -3.19417100 2.12059900 2.61957200  
 H -1.50519100 1.71736100 2.12405800  
 H -3.38803700 -0.71214300 3.21262400  
 H -4.79461500 0.32060100 2.81103000  
 H -4.64639900 -1.31674800 2.09658200  
 H -5.25882500 0.17642300 -0.27874300  
 H -5.16901700 1.68237700 0.69552800  
 H -4.22694700 1.52519100 -0.82559700  
 P -3.41465700 -2.36057900 -1.14613800  
 C -4.29151700 -1.68977400 -2.63707000  
 C -4.93503100 -2.87391200 -0.21187300  
 C -2.92970100 -4.02688500 -1.79229600  
 H -3.56797500 -1.46790100 -3.43799700  
 H -5.04477900 -2.39860300 -3.02820300  
 H -4.79490600 -0.74482400 -2.37084200  
 H -5.58439400 -3.51086000 -0.84047400  
 H -4.66680900 -3.43566200 0.69566900  
 H -5.51431600 -1.98557700 0.08941900  
 H -2.52241700 -4.62826100 -0.96132600  
 H -3.77479500 -4.57279100 -2.25243900  
 H -2.12784800 -3.90738700 -2.54038500  
**<sup>3</sup>TS3**  
 C -0.41437100 1.46454600 -0.51402700

C 0.72414900 2.15469600 -0.88791500  
C 0.67967300 3.51993400 -1.17742700  
C -0.56259100 4.15964900 -1.07464400  
C -1.73340200 3.48202400 -0.70920300  
C -1.63017300 2.11628200 -0.43338400  
H 1.55599900 4.09339800 -1.48488500  
H -0.62357500 5.22904300 -1.29828700  
H -2.67514000 4.03064600 -0.66363400  
C -4.00243200 1.37428900 0.19117400  
C -2.28436500 -0.12410100 0.02853700  
C -4.49299600 0.08584800 0.46745500  
C -4.85207500 2.48130900 0.24248100  
C -5.82774000 -0.14442100 0.79063800  
C -6.18800600 2.25199000 0.56585300  
H -4.49904400 3.49382600 0.04908300  
C -6.67206100 0.96267300 0.83354600  
H -6.19670300 -1.14953700 1.00724600  
H -6.87420400 3.10239400 0.61461000  
H -7.72752400 0.82485700 1.08493500  
C 3.19345700 1.48384400 -0.95638600  
C 1.53500900 -0.05467900 -0.66541500  
C 3.77369900 0.22129900 -0.73752500  
C 3.99494100 2.61304900 -1.12571400  
C 5.15286500 0.04105500 -0.68616300  
C 5.37694400 2.43477400 -1.07210400  
H 3.57024900 3.60404500 -1.28585000  
C 5.94955600 1.17232000 -0.85790900  
H 5.59253200 -0.94393500 -0.51269900  
H 6.02860400 3.30417400 -1.19847200  
H 7.03826500 1.07364000 -0.82264300  
N 1.82941500 1.26979100 -0.91974900  
N 2.73010400 -0.67618200 -0.57878600  
N -2.65725100 1.20125300 -0.07841200  
N -3.41902600 -0.78365200 0.34693100  
C -3.56077100 -2.20679700 0.53523700  
H -3.71270700 -2.44215700 1.60218900  
H -4.42831800 -2.56592100 -0.04273500  
H -2.66592900 -2.70472300 0.14973900  
C 2.94816300 -2.06471000 -0.26474200  
H 3.55779300 -2.53867000 -1.05194200  
H 3.46555900 -2.15304700 0.70508600  
H 1.98232900 -2.57382600 -0.22276800  
Co -0.32476200 -0.43717600 -0.24396300  
H -1.25371200 -2.39737100 1.78011700

C 3.42205500 -0.44589100 3.48087700  
C 3.03233100 0.95917700 3.00365500  
H 3.68522000 -0.47855400 4.55292500  
H 4.28595700 -0.84212000 2.90911200  
H 2.69433900 1.59398000 3.84685900  
H 3.86009900 1.48347900 2.49486800  
B 1.46066600 -0.53759700 2.33523100  
O 2.28290600 -1.23454200 3.22929500  
O 1.96611500 0.74439200 2.11373800  
N 0.28812500 -1.00232700 1.73815000  
C -0.16215600 -2.27959500 1.66087900  
C 0.59406500 -3.48298600 2.15854100  
H 0.59032100 -3.49938900 3.26654400  
H 0.11793400 -4.41489200 1.80461500  
H 1.65010300 -3.47787800 1.84916900  
B -0.41896300 -2.22438200 -1.31299900  
O -1.63570600 -2.64636200 -1.84318700  
O 0.62985700 -2.78419700 -2.03544900  
C -1.39015900 -3.59181900 -2.86866700  
C 0.10453900 -3.44656900 -3.16979700  
H -1.64274400 -4.60456200 -2.50031900  
H -2.02916100 -3.37487400 -3.74133100  
H 0.61334700 -4.41559900 -3.30962300  
H 0.28637600 -2.82919400 -4.06968800  
H -0.28004300 -2.33324700 0.14440000  
**<sup>1</sup>TS1<sub>Dipp</sub>**  
C 0.01682800 -1.74534800 -1.41990400  
C -1.17839500 -2.40908700 -1.69538500  
C -1.18925800 -3.67229600 -2.28679500  
C 0.04364100 -4.26536500 -2.58966100  
C 1.26367200 -3.63878700 -2.30216200  
C 1.22595600 -2.37708500 -1.70866500  
H -2.11393600 -4.20511500 -2.51409300  
H 0.05420400 -5.25357200 -3.05864200  
H 2.19978300 -4.14587400 -2.54113400  
C 3.66196500 -1.69640500 -1.27414500  
C 1.89167800 -0.39270900 -0.65183300  
C 4.15444100 -0.53192500 -0.65902300  
C 4.53779400 -2.67879600 -1.73676700  
C 5.51574200 -0.31425000 -0.47392500  
C 5.90319800 -2.46206300 -1.55411900  
H 4.18138100 -3.58631500 -2.22442200  
C 6.38666200 -1.30216300 -0.93135000  
H 5.87978500 0.59516000 0.00934600

|                |             |             |               |             |             |
|----------------|-------------|-------------|---------------|-------------|-------------|
| H 6.61177000   | -3.21762400 | -1.90533900 | C 3.45245700  | 2.86745800  | 2.26224000  |
| H 7.46460400   | -1.16890000 | -0.80289400 | C 3.40806300  | 3.90410600  | 0.08448100  |
| C -3.62734800  | -1.78819400 | -1.24565000 | C 3.52236800  | 4.00674000  | 1.46845300  |
| C -1.88584400  | -0.44041000 | -0.63743500 | H 3.54148600  | 2.95853200  | 3.34890700  |
| C -4.14439100  | -0.63368700 | -0.63204100 | H 3.45770100  | 4.80903800  | -0.52630600 |
| C -4.48141300  | -2.79256600 | -1.70153900 | H 3.66341900  | 4.98801500  | 1.93210900  |
| C -5.50990700  | -0.44679700 | -0.44360900 | C 3.14215500  | 2.56222600  | -2.04828800 |
| C -5.85080500  | -2.60728200 | -1.51442800 | C 4.53989800  | 2.46895100  | -2.66760700 |
| H -4.10545000  | -3.69315500 | -2.18727200 | C 2.35591100  | 3.70693700  | -2.68203900 |
| C -6.35902500  | -1.45662100 | -0.89414500 | H 2.59869100  | 1.63374700  | -2.28321200 |
| H -5.89354000  | 0.45606400  | 0.03675500  | H 5.10637000  | 1.60539400  | -2.28202500 |
| H -6.54284500  | -3.38050300 | -1.86014600 | H 4.46611400  | 2.35933500  | -3.76442700 |
| H -7.43933500  | -1.34804900 | -0.76239300 | H 5.12592700  | 3.38228800  | -2.45604400 |
| N -2.25392700  | -1.62033300 | -1.24744000 | H 1.36146000  | 3.81438600  | -2.21998300 |
| N -3.05385500  | 0.16507800  | -0.29905100 | H 2.89099700  | 4.67102100  | -2.61045600 |
| N 2.28475200   | -1.56150000 | -1.26826300 | H 2.19918600  | 3.49893000  | -3.75471900 |
| N 3.04691300   | 0.23934000  | -0.31816300 | C 3.21665800  | 0.37017800  | 2.57067100  |
| Co -0.00113800 | -0.14033100 | -0.47200400 | C 2.06450900  | 0.45545000  | 3.56946100  |
| H -0.01266300  | 0.76512400  | 0.76796200  | C 4.55136000  | 0.12749700  | 3.27590800  |
| C 0.81435100   | -2.99921400 | 2.43942100  | H 3.00756800  | -0.49756500 | 1.92867800  |
| C -0.68855900  | -3.22597500 | 2.19561600  | H 1.10360900  | 0.58051800  | 3.04460100  |
| H 0.96590100   | -2.57976300 | 3.45423600  | H 2.00451400  | -0.47275300 | 4.16464100  |
| H -0.82323000  | -4.09919500 | 1.52615900  | H 2.18685700  | 1.29693700  | 4.27582700  |
| B 0.02178700   | -1.44895700 | 0.94498200  | H 5.37837900  | 0.02921900  | 2.55148500  |
| O 1.16936500   | -1.99933800 | 1.49567400  | H 4.80300400  | 0.95112100  | 3.96890800  |
| O -1.09926600  | -2.07023700 | 1.47940400  | H 4.50898100  | -0.80589600 | 3.86566200  |
| N -0.03089200  | 1.63535400  | -1.53212300 | C -3.26733800 | 2.43327600  | -2.08885100 |
| C -0.03371500  | 1.91196300  | -0.35496900 | C -2.48891600 | 3.56573400  | -2.75433600 |
| C -0.05249000  | 3.06953400  | 0.56718200  | C -4.67076800 | 2.32216200  | -2.69193900 |
| H -0.07304300  | 4.01216900  | -0.00323800 | H -2.72373900 | 1.50091200  | -2.30772300 |
| H -0.94109200  | 3.01737800  | 1.21839300  | H -1.48357500 | 3.66998900  | -2.31591400 |
| H 0.84225800   | 3.05209900  | 1.21194200  | H -2.35804300 | 3.34384200  | -3.82784800 |
| C -3.20474700  | 1.46253700  | 0.27955200  | H -3.01630300 | 4.53394800  | -2.68228300 |
| C -3.33867800  | 2.57227700  | -0.57963000 | H -5.23130900 | 1.46763400  | -2.27843100 |
| C -3.28381100  | 1.57708600  | 1.67790900  | H -5.25655700 | 3.23960300  | -2.49817400 |
| C -3.57023600  | 3.81947100  | 0.00802900  | H -4.60776900 | 2.18464700  | -3.78627400 |
| C -3.52394000  | 2.84769000  | 2.21466900  | C -3.11807700 | 0.38248700  | 2.59489600  |
| C -3.67117800  | 3.95702400  | 1.38966200  | C -4.44042500 | 0.00793200  | 3.26495600  |
| H -3.67595900  | 4.70155300  | -0.62871900 | C -2.02056300 | 0.62965900  | 3.62783000  |
| H -3.59506800  | 2.96826500  | 3.29954100  | H -2.79227700 | -0.47440800 | 1.98676700  |
| H -3.85873400  | 4.94245100  | 1.82727800  | H -5.22080500 | -0.21741900 | 2.51770000  |
| C 3.16328200   | 1.52584200  | 0.29177800  | H -4.31089100 | -0.89016300 | 3.89554900  |
| C 3.27428000   | 1.60198900  | 1.69073000  | H -4.81405100 | 0.82333700  | 3.91141100  |
| C 3.22880800   | 2.66471400  | -0.53695500 | H -1.07153400 | 0.89710800  | 3.13439700  |

H -2.28467600 1.44108000 4.32982100  
H -1.84381300 -0.28141500 4.22499800  
C -1.51589800 -3.42305800 3.44316400  
H -1.39527100 -2.56975300 4.13296700  
H -2.58528100 -3.51476000 3.18672000  
H -1.21063500 -4.34405600 3.97077100  
C 1.67750000 -4.22686600 2.26766400  
H 1.39877100 -5.00670600 2.99872200  
H 1.56271400 -4.64045500 1.25036500  
H 2.74133900 -3.97650800 2.42088700  
**15K**  
C 0.92778300 0.06563500 -0.74212500  
C 0.54039600 -1.18550900 -1.22737400  
C -0.52361100 -1.33039500 -2.11976800  
C -1.21837500 -0.17086100 -2.50480700  
C -0.90031100 1.09636200 -1.98451200  
C 0.16690100 1.18503000 -1.08748900  
H -0.81144300 -2.29736400 -2.53598700  
H -2.03603800 -0.25851000 -3.22806300  
H -1.47566900 1.96948500 -2.29603700  
C 0.32256600 3.63325900 -0.33230500  
C 1.85299600 2.05044800 0.29279000  
C 1.30836100 4.23892100 0.47205800  
C -0.75691700 4.37029900 -0.81695400  
C 1.25462800 5.59035400 0.79998500  
C -0.80923400 5.72601200 -0.48750200  
H -1.55146300 3.90907700 -1.40398100  
C 0.17942900 6.32801900 0.30316000  
H 2.02153400 6.05552500 1.42371400  
H -1.64395600 6.33054300 -0.85416600  
H 0.10598800 7.39354000 0.53875800  
C 1.43279200 -3.53940800 -0.72183400  
C 2.44580900 -1.64139500 0.05985400  
C 2.56672900 -3.90057100 0.03216800  
C 0.60006000 -4.51292200 -1.27045500  
C 2.90904500 -5.23261600 0.24587800  
C 0.94124200 -5.84869700 -1.05256700  
H -0.29090200 -4.25057200 -1.84111400  
C 2.07671300 -6.20421300 -0.31090100  
H 3.79006700 -5.50679700 0.83109100  
H 0.30783900 -6.63514300 -1.47316300  
H 2.31367700 -7.26175100 -0.16355200  
N 1.40485800 -2.15730700 -0.69652200  
N 3.15397500 -2.72222200 0.46609500

N 0.69630600 2.30603200 -0.42743900  
N 2.21540000 3.24722300 0.81323400  
C 3.38557400 3.47959100 1.61867600  
H 4.01615800 4.25657400 1.15326700  
H 3.09974900 3.79615900 2.63505700  
H 3.94773300 2.54011000 1.68624200  
C 4.35000500 -2.67669200 1.26500400  
H 4.18231200 -3.16253200 2.23983500  
H 5.17745400 -3.18153100 0.73721400  
H 4.60830300 -1.62438300 1.43595400  
Co 2.48990100 0.25389600 0.25797700  
H 5.62064800 0.61744400 0.07405800  
C 2.13041400 1.52297200 -4.09403200  
C 2.17194200 -0.01244600 -4.20497000  
H 1.10299300 1.92024900 -4.12652200  
H 2.72128700 2.01875400 -4.88511100  
H 1.17787400 -0.46452400 -4.04933700  
H 2.57193800 -0.36027200 -5.17169500  
B 3.22770800 0.64748800 -2.34317000  
O 2.71571900 1.81548800 -2.83396500  
O 3.03729500 -0.43193700 -3.15760200  
N 3.95378000 0.57667400 -1.08888400  
C 5.21058700 0.69301900 -0.94762800  
C 6.19975000 0.92399700 -2.03709700  
H 6.75335300 1.86261200 -1.84869800  
H 6.94961900 0.11127200 -2.04091400  
H 5.72862000 0.97862100 -3.03221400  
B 2.33378400 0.10466700 2.19638800  
O 2.00986100 1.15515400 3.07620100  
O 2.35170900 -1.09918500 2.92458900  
C 2.04550600 0.68621100 4.40286100  
C 2.09417400 -0.84685000 4.28435000  
H 2.94203100 1.08474800 4.91642400  
H 1.16024500 1.04519300 4.95912100  
H 2.89050500 -1.29010600 4.90947400  
H 1.13994900 -1.32249600 4.58303900  
H 3.52023800 0.33292100 1.47057800  
K -3.04838100 -0.38257900 -0.05947300  
O -1.76711000 -0.99032800 2.30667100  
O -2.21247600 -3.00411500 0.34628400  
O -5.59243500 0.16792800 -0.91061300  
O -3.88162600 2.32115500 -0.61249500  
O -4.90692900 -2.46577700 -0.46760600  
O -2.71547300 1.55859100 1.72696700

|                                       |                                       |
|---------------------------------------|---------------------------------------|
| C -0.95721700 -2.13380800 2.16825300  | H -0.25705100 -5.05557500 -0.14365100 |
| C -1.00835300 0.15371900 2.62003300   | H -2.38772200 -3.79892700 -0.18614400 |
| C -1.78177100 -3.28269900 1.65711700  | C -3.83453100 -1.05411600 0.17966600  |
| C -3.08699300 -3.95743600 -0.20196000 | C -2.05133900 0.36545400 -0.02820700  |
| C -6.01923500 1.41022800 -1.40550900  | C -4.31725900 0.26898900 0.08213900   |
| C -6.57109800 -0.83902500 -0.95879600 | C -4.71743600 -2.12124200 0.33934200  |
| C -4.80926000 2.28888200 -1.66370700  | C -5.67858600 0.55665400 0.11957400   |
| C -4.34819200 2.85147000 0.60142900   | C -6.08336900 -1.83102800 0.37852600  |
| C -4.53395400 -3.67769800 0.13835700  | H -4.36240800 -3.14776600 0.43992000  |
| C -6.16492100 -1.98895700 -0.07283500 | C -6.55840400 -0.51817300 0.26565400  |
| C -1.89789300 1.34583900 2.84900600   | H -6.04452800 1.58347400 0.04201600   |
| C -3.21647900 2.86280800 1.59754400   | H -6.79665100 -2.65118700 0.50251600  |
| H -0.52171600 -2.41989200 3.14699200  | H -7.63552100 -0.32979800 0.29747400  |
| H -0.28283200 0.36066600 1.80986300   | C 3.43716400 -1.22359700 0.61145300   |
| H -0.43262800 -0.01500900 3.54819900  | C 1.75312600 0.28560800 0.24198400    |
| H -2.64552000 -3.44318300 2.33312100  | C 3.98520300 0.07766800 0.60582400    |
| H -1.16100200 -4.20064600 1.66882000  | C 4.24916600 -2.33458800 0.83466300   |
| H -2.81513900 -4.97919500 0.12614500  | C 5.34602300 0.29941500 0.79783600    |
| H -2.96638700 -3.91173600 -1.29796300 | C 5.61424100 -2.11035600 1.03031700   |
| H -6.72134800 1.88167700 -0.68789800  | H 3.84100600 -3.34560100 0.86596700   |
| H -6.56406300 1.29367600 -2.36389500  | C 6.15614200 -0.81896400 1.00744200   |
| H -6.70086500 -1.19029800 -2.00228900 | H 5.76320900 1.30932200 0.78716500    |
| H -7.54801800 -0.45635700 -0.60207300 | H 6.27251400 -2.96603400 1.20710800   |
| H -4.25296900 1.89916100 -2.53244200  | H 7.23070300 -0.68231400 1.16031800   |
| H -5.16242700 3.30996400 -1.91742600  | N 2.08385700 -1.05683800 0.38894800   |
| H -4.72118000 3.88726200 0.46408500   | N 2.93510300 0.94950800 0.38466100    |
| H -5.17763700 2.23842700 1.00601900   | N -2.45871200 -0.95332700 0.10878700  |
| H -4.66975300 -3.61931500 1.23798200  | N -3.20766700 1.08593900 -0.04246700  |
| H -5.16825500 -4.50953100 -0.23169400 | C -3.25889200 2.51281000 -0.20324200  |
| H -6.13830000 -1.66151800 0.98845300  | H -3.92487500 2.78494300 -1.04049500  |
| H -6.93554900 -2.78175200 -0.15902100 | H -3.62105800 3.00498800 0.71726700   |
| H -1.23692300 2.21643200 3.02674500   | H -2.24086600 2.86437400 -0.42682700  |
| H -2.52887400 1.19949700 3.74960200   | C 3.07339200 2.37637300 0.28802200    |
| H -2.41284800 3.54946600 1.26706100   | H 3.41882400 2.80126900 1.24757200    |
| H -3.61202900 3.23400900 2.56421000   | H 3.78572500 2.64512800 -0.50946200   |
| H -0.11596700 -1.92946500 1.47941900  | H 2.08885800 2.79456800 0.03836300    |
| <sup>32</sup>                         | Co -0.14516900 0.67124100 0.20980400  |
| C -0.20831500 -1.22548900 0.50836200  | H 0.59049300 3.36811200 -2.31387100   |
| C 0.98295300 -1.94563200 0.38472800   | C 0.59397500 0.20949100 -3.59021400   |
| C 0.99243800 -3.32514800 0.16859400   | C 2.07632700 0.44137800 -3.23338300   |
| C -0.24245500 -3.97434600 0.02502000  | H 0.13362400 -0.57978000 -2.97162800  |
| C -1.45485200 -3.26914700 0.02292400  | H 0.44315400 -0.04410300 -4.65302200  |
| C -1.40733600 -1.89113200 0.24092600  | H 2.44209700 -0.27585900 -2.48015400  |
| H 1.91741500 -3.89907200 0.07170800   | H 2.74048700 0.39488100 -4.11382900   |

B 0.86066400 2.25848500 -2.71339000  
 O -0.05143900 1.44721200 -3.30970300  
 O 2.12529300 1.75530200 -2.68915800  
 N -0.22821400 2.09061900 1.54489600  
 C -0.28292300 2.95668900 2.31351000  
 C -0.35271400 4.03132600 3.28232700  
 H 0.43203000 3.90603000 4.04804800  
 H -0.20898100 5.00743900 2.78744700  
 H -1.33609600 4.03074100 3.78282100  
**<sup>1</sup>TS2W<sub>PMc</sub>**  
 C 0.48229000 0.05425300 -0.55029600  
 C 0.23455300 -1.24842400 -1.01339300  
 C -0.82331500 -1.52050400 -1.93531000  
 C -1.53741200 -0.42478700 -2.50252300  
 C -1.27370500 0.91927900 -2.06827200  
 C -0.25022400 1.13329800 -1.11093700  
 H -1.05359100 -2.53283300 -2.27032600  
 H -2.30609100 -0.61430800 -3.25427700  
 H -1.82153400 1.74619400 -2.52120200  
 C -0.00864400 3.67041000 -0.84496400  
 C 1.43495400 2.20107000 0.12847800  
 C 0.95295000 4.39702300 -0.11396600  
 C -1.02254100 4.32980600 -1.54187300  
 C 0.93712600 5.78928500 -0.06817500  
 C -1.04058000 5.72252400 -1.48930200  
 H -1.77576000 3.78535200 -2.11155200  
 C -0.07682400 6.44247700 -0.76698500  
 H 1.69200800 6.34983400 0.48818400  
 H -1.82372800 6.26455100 -2.02730400  
 H -0.11946100 7.53538500 -0.75376900  
 C 1.55756800 -3.43697100 -0.75603500  
 C 2.12666600 -1.53032900 0.34817500  
 C 2.67756600 -3.70084800 0.05879100  
 C 1.04828200 -4.42570000 -1.60088200  
 C 3.29418500 -4.94917300 0.07758100  
 C 1.66882100 -5.67372600 -1.58392200  
 H 0.20622100 -4.23554200 -2.26723200  
 C 2.76903500 -5.93716800 -0.75401600  
 H 4.16522900 -5.14301800 0.70799400  
 H 1.28987700 -6.46341600 -2.23925100  
 H 3.23073600 -6.92860400 -0.76922800  
 N 1.22608300 -2.12254500 -0.50591300  
 N 2.96818500 -2.52358700 0.72523500  
 N 0.32276600 2.34510900 -0.66832400  
 N 1.79391000 3.46547200 0.46973400  
 C 2.92250200 3.81368100 1.29299700  
 H 2.67088500 4.69294300 1.90736000  
 H 3.15443100 2.96135000 1.94406400  
 H 3.80535100 4.03852300 0.67029800  
 C 4.07471900 -2.37910200 1.63437400  
 H 4.14284400 -3.27448300 2.27381300  
 H 5.02071400 -2.24848700 1.08160900  
 H 3.90120000 -1.49329000 2.25754800  
 Co 2.00952200 0.39688000 0.48075300  
 H 5.52153900 0.94664900 0.71334400  
 C 4.83958900 1.51221600 -2.26415800  
 C 4.92068800 -0.01673800 -2.36052400  
 H 4.68667000 1.99507200 -3.24507100  
 H 5.75062800 1.94678200 -1.80905800  
 H 4.49414200 -0.39328700 -3.30972600  
 H 5.95344300 -0.39784500 -2.27615100  
 B 3.37276300 0.57094500 -0.79156600  
 O 3.73072200 1.75662500 -1.42421400  
 O 4.14189200 -0.48111700 -1.27826600  
 N 3.56854700 0.72583900 1.41319700  
 C 4.79977800 0.92136400 1.56878900  
 C 5.45670100 1.13561100 2.90797900  
 H 4.70714900 1.09325200 3.71644400  
 H 6.23150900 0.36633100 3.09468800  
 H 5.97118800 2.11585900 2.94382900  
 W -1.80515400 -0.34774600 -0.23181000  
 P -1.60696700 0.42494000 2.07091600  
 C -0.32972400 -0.45658500 3.07084300  
 C -3.00398600 0.44824800 3.28798700  
 C -1.04785600 2.16631600 2.35149700  
 H 0.62910600 -0.39055700 2.52387200  
 H -0.20463900 -0.02568200 4.08173800  
 H -0.59151400 -1.52526200 3.16140500  
 H -3.47562600 -0.54191700 3.36290300  
 H -2.65476100 0.75483000 4.29102400  
 H -3.76943500 1.16901200 2.95294800  
 H -1.71552000 2.86829300 1.82502500  
 H -1.04069000 2.41459900 3.42838500  
 H -0.02815200 2.29833400 1.95987900  
 P -4.01842900 0.61245700 -0.34795400  
 C -4.77238400 0.60856700 -2.03898400  
 C -4.17918400 2.41490700 0.04263000  
 C -5.50444800 0.00958100 0.58453500

|                                       |                                       |
|---------------------------------------|---------------------------------------|
| H -4.87299800 -0.43511400 -2.38265900 | C -1.99304700 0.62201000 -0.28675700  |
| H -5.76628900 1.09269400 -2.05481600  | C -4.20243500 0.17082100 -0.49132200  |
| H -4.11141500 1.13671700 -2.74672900  | C -4.21203700 -2.01778000 -1.55430600 |
| H -3.38977900 2.97247600 -0.48785300  | C -5.59235000 0.22768200 -0.45787400  |
| H -5.16849300 2.81983400 -0.24147200  | C -5.60494500 -1.96317300 -1.51907700 |
| H -4.03385700 2.57751800 1.12379800   | H -3.70748600 -2.88639700 -1.97723800 |
| H -5.31237700 0.03064600 1.66948600   | C -6.28591600 -0.86169000 -0.98199800 |
| H -6.39290500 0.63206900 0.37016400   | H -6.11686100 1.08887300 -0.03792400  |
| H -5.73150100 -1.02998000 0.29545700  | H -6.17734000 -2.80418200 -1.92039200 |
| P -2.73219900 -2.46908800 0.48990500  | H -7.37949600 -0.85743300 -0.97277700 |
| C -3.85595400 -3.28047000 -0.73772000 | N -2.17443800 -0.61122200 -0.89002800 |
| C -3.72043500 -2.78484400 2.02715600  | N -3.24309400 1.07309500 -0.05254800  |
| C -1.51753400 -3.84161000 0.73140900  | N 2.35242000 0.02441800 -0.81892700   |
| H -3.36407100 -3.28354600 -1.72509100 | N 2.87197300 1.93553500 0.05324500    |
| H -4.10968200 -4.31929000 -0.45454500 | C 2.81130100 3.24663300 0.64847000    |
| H -4.79001600 -2.70101700 -0.83315000 | H 1.75291200 3.47651000 0.82701700    |
| H -4.57212200 -2.09216500 2.10333900  | H 3.37165700 3.25420200 1.59873000    |
| H -4.10375600 -3.82175800 2.04128600  | H 3.24080100 3.99202700 -0.04084400   |
| H -3.07391500 -2.64538300 2.91038200  | C -3.59168300 2.34530500 0.52637200   |
| H -0.72326600 -3.51035400 1.42092400  | H -2.66683300 2.86140800 0.79429600   |
| H -1.99731100 -4.75028300 1.13936400  | H -4.14813900 2.95111800 -0.20703800  |
| H -1.04290300 -4.10329500 -0.22522700 | H -4.20748300 2.19564700 1.42865900   |
| <b>l<sup>1</sup>TS4W<sub>CO</sub></b> | Co -0.12307000 1.14342800 -0.05253200 |
| C 0.11058100 -0.44163800 -0.94389800  | H -0.33364500 4.91782000 -0.47140900  |
| C -0.99029400 -1.27018700 -1.23815400 | C -0.61093100 0.73319000 3.29314400   |
| C -0.83459900 -2.54991800 -1.83593100 | C -1.11536800 1.98297500 4.01923500   |
| C 0.48890400 -2.99795500 -2.07936500  | H -1.43700400 0.06596900 2.98981500   |
| C 1.63410900 -2.19649000 -1.80050900  | H 0.11665100 0.14631600 3.87474600    |
| C 1.41240100 -0.93617800 -1.20066800  | H -2.07459800 1.81868700 4.53723000   |
| H -1.67494300 -3.19615500 -2.08015900 | H -0.37864900 2.35089300 4.75773000   |
| H 0.63583300 -3.98801300 -2.51554500  | B -0.54483900 2.53710400 1.89628900   |
| H 2.62730300 -2.57851000 -2.02761200  | O 0.01712000 1.26659800 2.13965600    |
| C 3.73618300 0.07401800 -0.86049200   | O -1.28107500 2.95053600 2.99488400   |
| C 1.81183500 1.16436500 -0.24993400   | N -0.38110900 3.15012100 0.64717400   |
| C 4.06566900 1.32111200 -0.30231500   | C -0.76127600 4.54715600 0.47490600   |
| C 4.73049700 -0.79613400 -1.30360500  | C -0.26385400 5.46777500 1.58139500   |
| C 5.38492600 1.74471200 -0.17734800   | H 0.83639800 5.42415900 1.66869600    |
| C 6.05350200 -0.37366400 -1.17523500  | H -0.54240300 6.51223000 1.35127900   |
| H 4.50303200 -1.77346300 -1.72954100  | H -0.69679200 5.20541200 2.55957100   |
| C 6.37760500 0.87424000 -0.62476200   | B -0.30012500 2.62557500 -1.20658000  |
| H 5.63140700 2.71646800 0.25642200    | O 0.76746200 3.28598300 -1.82987700   |
| H 6.85583300 -1.03653600 -1.51124600  | O -1.49701600 2.95357300 -1.85847100  |
| H 7.42755300 1.16869200 -0.54125700   | C 0.29673700 3.89037600 -3.01239300   |
| C -3.51508600 -0.92968600 -1.03052800 | C -1.23018500 3.91103600 -2.85739300  |

H 0.72970400 4.90025200 -3.12445800  
 H 0.60858200 3.28833400 -3.88819800  
 H -1.60017100 4.90474800 -2.53704700  
 H -1.75571200 3.64199800 -3.79053400  
 H -1.86049200 4.66966700 0.37581600  
 W 0.38997500 -2.56724500 0.24493000  
 C -1.09819500 -2.63849300 1.53150400  
 O -2.01162000 -2.63901800 2.24831700  
 C 1.53940100 -1.95605300 1.72717200  
 O 2.23330100 -1.55404500 2.56454300  
 C 0.84400900 -4.41721800 0.75540500  
 O 1.11644500 -5.51451600 1.01386800  
**<sup>15</sup>W<sub>PMc</sub>**  
 C 0.55986000 -0.20866800 -0.48043400  
 C -0.44014800 -1.04476800 -1.02616300  
 C -1.27006500 -0.63454800 -2.11147400  
 C -1.16290200 0.74042100 -2.51227400  
 C -0.20252700 1.64705500 -1.94945300  
 C 0.63358400 1.12730300 -0.91707500  
 H -1.96438400 -1.30305300 -2.62006200  
 H -1.78524600 1.09756800 -3.33800800  
 H -0.12006400 2.66294900 -2.33259700  
 C 2.46088400 2.90152800 -0.56766900  
 C 2.54495800 0.84667400 0.42467200  
 C 3.65910400 2.80035500 0.16866800  
 C 2.17523800 4.05516500 -1.29756100  
 C 4.58738400 3.83677400 0.20702900  
 C 3.10942100 5.09097200 -1.26576600  
 H 1.25045800 4.15958000 -1.86514600  
 C 4.29516300 4.98807900 -0.52515200  
 H 5.51038900 3.74984900 0.78544300  
 H 2.90634600 6.00579200 -1.83024400  
 H 5.00286400 5.82221300 -0.52086800  
 C -0.90073600 -3.54769500 -0.68975300  
 C 0.82284400 -2.47352300 0.35486700  
 C -0.22128700 -4.47107200 0.13230800  
 C -1.99813500 -3.95070300 -1.45023700  
 C -0.61847300 -5.80171500 0.22545800  
 C -2.39433800 -5.28580100 -1.35891600  
 H -2.53444600 -3.25439700 -2.09536600  
 C -1.71984700 -6.19745500 -0.53470600  
 H -0.08885800 -6.50797600 0.86948600  
 H -3.25344100 -5.62553900 -1.94476100  
 H -2.06080900 -7.23573400 -0.48698600  
 N -0.24755800 -2.34792800 -0.50894200  
 N 0.80901800 -3.77641500 0.74201100  
 N 1.79614400 1.70890400 -0.35459000  
 N 3.66286900 1.54543000 0.75133600  
 C 4.73843300 1.04138000 1.56110800  
 H 5.68796000 1.07322200 0.99839500  
 H 4.83999600 1.63550600 2.48483500  
 H 4.50195000 0.00470000 1.83152300  
 C 1.74596800 -4.37679400 1.65288000  
 H 1.22315200 -4.76798900 2.54173900  
 H 2.29098700 -5.19942700 1.15726000  
 H 2.45269900 -3.60210400 1.97461100  
 Co 1.95403200 -0.95021000 0.55105700  
 H 4.71864000 -2.46669000 0.36327300  
 C 2.25832700 0.03432600 -3.89785600  
 C 1.56943900 -1.34250900 -4.01641200  
 H 1.52846000 0.85689900 -3.82522900  
 H 2.94292900 0.24095700 -4.73882900  
 H 0.47161300 -1.25436000 -4.04711900  
 H 1.90519400 -1.90936900 -4.90270600  
 B 2.74020800 -1.22743600 -2.10279100  
 O 3.00861300 -0.02649900 -2.69429000  
 O 1.94663000 -2.05217100 -2.84647300  
 N 3.30792300 -1.61945300 -0.82894300  
 C 4.40997700 -2.22863400 -0.66967200  
 C 5.34528600 -2.66138900 -1.74827300  
 H 6.33625500 -2.19379300 -1.59753100  
 H 5.50046800 -3.75516400 -1.69636100  
 H 4.97841900 -2.40117700 -2.75480100  
 B 1.80862400 -0.84396600 2.47381000  
 O 2.21356300 0.25887300 3.26033500  
 O 1.11914800 -1.74953900 3.31030000  
 C 1.87710500 0.02667200 4.60514400  
 C 0.89302300 -1.14743400 4.56002200  
 H 2.78961300 -0.22853500 5.18169700  
 H 1.43719200 0.93598400 5.05310900  
 H 1.05877700 -1.87780000 5.37234900  
 H -0.15818600 -0.80217000 4.62661300  
 H 2.86170500 -1.45801200 1.77071000  
 W -1.63161400 0.79595000 -0.33274700  
 P -1.41607300 2.50667500 1.38851300  
 C -0.54444300 1.98202400 2.92225100  
 C -2.85498300 3.41959900 2.12398300  
 C -0.40671100 3.99983700 0.98359300



H 0.43546600 1.56527900 2.63664400  
 H -0.40277200 2.81825300 3.63263300  
 H -1.11422600 1.17818500 3.41739800  
 H -3.61315400 2.72367700 2.51210600  
 H -2.52576700 4.08146700 2.94642400  
 H -3.32272400 4.04513400 1.34386500  
 H -0.76798900 4.45264600 0.04462400  
 H -0.45476500 4.75466100 1.78988800  
 H 0.64451600 3.70979200 0.84668700  
 P -3.73550200 1.68562400 -1.11116600  
 C -4.56198200 0.71827900 -2.46193800  
 C -3.59656700 3.33016000 -1.95152000  
 C -5.26661500 2.01854300 -0.11478000  
 H -4.84485100 -0.27749900 -2.08016700  
 H -5.46858000 1.22924700 -2.83553200  
 H -3.87102400 0.57035600 -3.30772200  
 H -2.81510000 3.27433300 -2.72865000  
 H -4.54637100 3.65588600 -2.41606200  
 H -3.27877400 4.08833400 -1.21530400  
 H -5.04308100 2.69022900 0.72756200  
 H -6.05534800 2.48025200 -0.73717700  
 H -5.65914200 1.07347500 0.29545300  
 P -2.86139500 -0.60568200 1.23392000  
 C -4.18931200 -1.67203400 0.50649000  
 C -3.85922900 0.08050600 2.63902000  
 C -1.95054000 -1.91291200 2.17631600  
 H -3.77142700 -2.24787100 -0.33418300  
 H -4.60330900 -2.37657700 1.25191000  
 H -5.00776300 -1.04308200 0.11909400  
 H -4.56591700 0.83548100 2.26346600  
 H -4.42835900 -0.71957000 3.14686900  
 H -3.19808800 0.55926100 3.37993800  
 H -0.94166200 -1.57468500 2.45859100  
 H -2.50996900 -2.21656500 3.08012000  
 H -1.83481600 -2.80595300 1.54227800  
**<sup>13</sup>Dipp**  
 C 0.00154000 -1.85843900 -1.27490800  
 C -1.19578500 -2.48186300 -1.62758800  
 C -1.20756600 -3.72510300 -2.25798400  
 C 0.02560900 -4.33452900 -2.52764800  
 C 1.24682100 -3.73564600 -2.18960500  
 C 1.21087400 -2.49073400 -1.56222700  
 H -2.13203000 -4.22437000 -2.55189900  
 H 0.03543100 -5.30910700 -3.02433900  
 H 2.18139300 -4.24396500 -2.43092700  
 C 3.64179200 -1.83616700 -1.09225900  
 C 1.88468700 -0.46772900 -0.56870300  
 C 4.14357700 -0.65471200 -0.52048600  
 C 4.50781500 -2.85278500 -1.49633300  
 C 5.50736100 -0.43625800 -0.35269000  
 C 5.87451500 -2.64169000 -1.31814700  
 H 4.14376900 -3.78246000 -1.93391600  
 C 6.36871900 -1.45345400 -0.75995900  
 H 5.87815300 0.49247700 0.08676000  
 H 6.57599200 -3.42300600 -1.62434200  
 H 7.44800000 -1.32308900 -0.63991900  
 C -3.64169400 -1.83806700 -1.22164400  
 C -1.90463100 -0.46014100 -0.66052900  
 C -4.16147800 -0.66917800 -0.63783300  
 C -4.49350600 -2.86036100 -1.64032200  
 C -5.52753600 -0.47301800 -0.46409300  
 C -5.86329300 -2.66992700 -1.46012500  
 H -4.11641100 -3.77931700 -2.08952400  
 C -6.37438300 -1.49732100 -0.88453300  
 H -5.91063100 0.44501900 -0.01246300  
 H -6.55386900 -3.45673900 -1.77701200  
 H -7.45536400 -1.38494300 -0.76149400  
 N -2.26964200 -1.66216200 -1.23702400  
 N -3.07447500 0.14039400 -0.32640500  
 N 2.26847600 -1.67412500 -1.12276600  
 N 3.04474500 0.14544800 -0.21921100  
 Co -0.01633800 -0.18077600 -0.45636500  
 H -0.06476800 2.80140500 1.51110900  
 C 0.67331800 -2.94763400 2.54511500  
 C -0.80926300 -3.22691000 2.23546900  
 H 0.76092600 -2.45082200 3.53209400  
 H -0.88685800 -4.15006100 1.62645700  
 B -0.06469500 -1.52878600 0.90235600  
 O 1.06334700 -2.01293700 1.54943400  
 O -1.20261900 -2.13658200 1.41502600  
 N -0.01265200 1.55531900 -0.11670100  
 C -0.01941200 2.69367900 0.40052800  
 C 0.02846000 4.01041300 -0.32657900  
 H 0.08017800 3.86752000 -1.41567300  
 H -0.86783100 4.61050200 -0.08423000  
 H 0.91079300 4.58966500 0.00145200  
 C -3.22628000 1.45811800 0.20180300  
 C -3.49797200 2.50273500 -0.70078600

|               |             |             |                                     |             |             |
|---------------|-------------|-------------|-------------------------------------|-------------|-------------|
| C -3.15033600 | 1.65463800  | 1.58811700  | H 4.68444100                        | 0.49850700  | 3.50499800  |
| C -3.66542200 | 3.78571800  | -0.17354100 | H 3.62820500                        | -0.92893400 | 3.71697400  |
| C -3.32082500 | 2.95830900  | 2.06670900  | C -2.87380700                       | 0.51735300  | 2.54854600  |
| C -3.57366200 | 4.01376000  | 1.19708600  | C -3.99362200                       | 0.35687200  | 3.57616700  |
| H -3.86584800 | 4.62356000  | -0.84721900 | C -1.51246500                       | 0.70081700  | 3.21664100  |
| H -3.25512000 | 3.14811300  | 3.14222000  | H -2.81452800                       | -0.41510800 | 1.96791800  |
| H -3.70281700 | 5.02674300  | 1.59088900  | H -4.97310000                       | 0.21216600  | 3.08675900  |
| C 3.19713200  | 1.49087400  | 0.24061500  | H -3.80265000                       | -0.52526100 | 4.21359200  |
| C 3.06554500  | 1.77813800  | 1.61067600  | H -4.07400600                       | 1.23628500  | 4.24071600  |
| C 3.52523100  | 2.46894900  | -0.71417800 | H -0.71692100                       | 0.73158000  | 2.45444200  |
| C 3.28084500  | 3.09994400  | 2.01174900  | H -1.47158700                       | 1.63316700  | 3.80885100  |
| C 3.73248100  | 3.77582700  | -0.26076000 | H -1.30027500                       | -0.13917100 | 3.90079200  |
| C 3.61594700  | 4.08760700  | 1.08879200  | C -1.70410000                       | -3.35317800 | 3.44517700  |
| H 3.18070000  | 3.36758300  | 3.06611500  | H -2.75412800                       | -3.49031700 | 3.13519400  |
| H 3.97948200  | 4.56370100  | -0.97776300 | H -1.41041700                       | -4.22500600 | 4.05631600  |
| H 3.77889600  | 5.11551700  | 1.42759900  | H -1.64324900                       | -2.44892400 | 4.07503100  |
| C -3.57123500 | 2.26195600  | -2.19682100 | C 1.56739100                        | -4.16453500 | 2.50966700  |
| C -2.26421200 | 2.67687400  | -2.87475500 | H 1.26386100                        | -4.89644400 | 3.27932000  |
| C -4.77810300 | 2.93811200  | -2.84371400 | H 1.51447800                        | -4.65037500 | 1.51947400  |
| H -3.68730100 | 1.17848900  | -2.35475400 | H 2.61626900                        | -3.87889400 | 2.69941600  |
| H -1.40280400 | 2.16794300  | -2.41076700 | <b><sup>12</sup>W<sub>PMc</sub></b> |             |             |
| H -2.28773400 | 2.41937100  | -3.94930000 | C -0.63707600                       | 0.28037900  | -0.44146200 |
| H -2.10349500 | 3.76690900  | -2.78941100 | C 0.37195200                        | 1.08156100  | -1.02657600 |
| H -5.72079200 | 2.64595100  | -2.34823400 | C 1.16306000                        | 0.64621700  | -2.12729100 |
| H -4.70396100 | 4.03977300  | -2.81143800 | C 0.99020800                        | -0.71295200 | -2.54400500 |
| H -4.85058600 | 2.64714400  | -3.90666200 | C -0.01278300                       | -1.56791300 | -1.98649900 |
| C 3.60381800  | 2.14759900  | -2.19510300 | C -0.81015700                       | -1.02518100 | -0.93742600 |
| C 4.85152900  | 2.72474500  | -2.85993500 | H 1.87698200                        | 1.29276200  | -2.63705600 |
| C 2.32619000  | 2.59713900  | -2.90681700 | H 1.58330100                        | -1.08930900 | -3.38198400 |
| H 3.66238600  | 1.05374200  | -2.30119500 | H -0.15936600                       | -2.56928700 | -2.38834100 |
| H 5.77218600  | 2.40548400  | -2.34049300 | C -2.77648200                       | -2.66725100 | -0.69307100 |
| H 4.91724800  | 2.37842100  | -3.90658600 | C -2.71352000                       | -0.65696000 | 0.38357200  |
| H 4.83817200  | 3.82901700  | -2.88174000 | C -3.98028800                       | -2.49377800 | 0.02077300  |
| H 1.43647600  | 2.14809800  | -2.43406300 | C -2.57564400                       | -3.80679000 | -1.47213500 |
| H 2.21652300  | 3.69625200  | -2.86893200 | C -5.00095200                       | -3.43908800 | -0.01854000 |
| H 2.34914600  | 2.29375600  | -3.96933500 | C -3.59978600                       | -4.75354000 | -1.51292500 |
| C 2.70022900  | 0.69527600  | 2.60685000  | H -1.65352600                       | -3.96500700 | -2.03142800 |
| C 1.99717600  | 1.23378300  | 3.84884500  | C -4.79248200                       | -4.57729500 | -0.79799100 |
| C 3.92339800  | -0.13265800 | 3.00995000  | H -5.93231800                       | -3.29063000 | 0.53344300  |
| H 2.00123400  | 0.01097300  | 2.10131500  | H -3.46490500                       | -5.65370300 | -2.11968000 |
| H 1.16343200  | 1.90604500  | 3.58709600  | H -5.57417800                       | -5.34032300 | -0.85580400 |
| H 1.58130000  | 0.39617900  | 4.43558200  | C 0.87873600                        | 3.59254900  | -0.76703800 |
| H 2.68782200  | 1.78392700  | 4.51382400  | C -0.87577400                       | 2.57711700  | 0.27804600  |
| H 4.39733300  | -0.62093300 | 2.14306700  | C 0.17589900                        | 4.55761700  | -0.01526100 |

C 1.99714900 3.95564800 -1.51674200  
C 0.56387500 5.89374900 0.00943500  
C 2.38733800 5.29538200 -1.48947500  
H 2.55319400 3.22645200 -2.10662600  
C 1.68556700 6.24999800 -0.74025500  
H 0.00960000 6.63493200 0.59050700  
H 3.26175900 5.60487200 -2.06931200  
H 2.01981200 7.29152400 -0.74546600  
N 0.21547200 2.40205700 -0.54500700  
N -0.86524100 3.89274000 0.60945200  
N -2.01560900 -1.54649500 -0.40938900  
N -3.88487300 -1.27720900 0.67243200  
C -4.95008200 -0.68741900 1.43591400  
H -5.82075100 -0.48470000 0.78928200  
H -5.25271400 -1.35738300 2.25955400  
H -4.58609800 0.26341500 1.84855900  
C -1.86003400 4.53088000 1.42729200  
H -1.38536500 5.06022200 2.27175500  
H -2.45017200 5.24740400 0.83079100  
H -2.53122100 3.75098200 1.81240700  
Co -1.96443500 1.06731400 0.64011000  
H -3.37075200 1.86427300 0.72828800  
C -4.74088100 1.70137900 -2.38840300  
C -3.77610900 2.87428600 -2.57669800  
H -4.84635700 1.08167100 -3.29652400  
H -5.75235700 2.04933400 -2.09410300  
H -3.04556300 2.66945500 -3.38483600  
H -4.29004100 3.82294000 -2.81431900  
B -3.21518000 1.73566900 -0.67640400  
O -4.17162600 0.94742400 -1.34545300  
O -3.10828400 2.97346000 -1.34331800  
N -1.64894500 0.95066300 2.54453000  
C -1.48551200 0.85192800 3.68605400  
C -1.24140800 0.68724400 5.10517000  
H -1.08144500 -0.38034500 5.33573600  
H -0.34105800 1.25069800 5.40451200  
H -2.09894200 1.05232000 5.69585300  
W 1.48297700 -0.83456000 -0.35601800  
P 2.73319300 0.47624700 1.24809000  
P 3.55147700 -1.77737600 -1.14868900  
P 1.16044300 -2.58339600 1.27778500  
C 1.81656600 1.69304400 2.29831100  
H 1.04210800 1.14842500 2.86041200  
H 2.48931800 2.21812200 3.00143000

H 1.30622300 2.43822100 1.67047100  
C 4.02649800 1.59686800 0.54436900  
H 3.58093100 2.19922000 -0.26273000  
H 4.46133100 2.27398300 1.30311900  
H 4.83416800 0.98726700 0.10523400  
C 3.74799900 -0.25630700 2.62073500  
H 4.44764800 -1.00904300 2.22749800  
H 4.32575800 0.52347400 3.15091800  
H 3.08333800 -0.75012400 3.34974000  
C 4.41017900 -0.81954800 -2.48577700  
H 4.70294200 0.16972000 -2.09399300  
H 5.31289500 -1.34197100 -2.85308300  
H 3.73054600 -0.65622400 -3.33816200  
C 5.06652700 -2.15867600 -0.14590900  
H 5.49221600 -1.22201300 0.25120600  
H 4.81578100 -2.80994800 0.70566000  
H 5.83946700 -2.65720100 -0.75975800  
C 3.37199900 -3.40944100 -2.00593200  
H 2.57953300 -3.32896300 -2.76974900  
H 4.30818700 -3.74916400 -2.48803600  
H 3.05038900 -4.16958600 -1.27305400  
C 2.51671600 -3.57057800 2.07060300  
H 2.11027500 -4.28645200 2.80889500  
H 3.04864300 -4.14143200 1.28986100  
H 3.24265500 -2.91644800 2.57575200  
C 0.12635000 -4.02658000 0.75707400  
H 0.55000100 -4.47342300 -0.15838800  
H 0.07198200 -4.80120100 1.54404700  
H -0.89549000 -3.68881100 0.53279000  
C 0.21229600 -2.08606900 2.78488800  
H -0.07257800 -2.94744900 3.41825200  
H 0.81575500 -1.38154900 3.38176600  
H -0.68892600 -1.55278400 2.44038200  
**<sup>1</sup>H<sub>Dipp</sub>**  
C -0.09984000 -0.06638000 -1.51616400  
C 0.61266300 -0.99917100 -2.27907700  
C 0.23088900 -1.32537600 -3.58016900  
C -0.86909900 -0.65489500 -4.13452700  
C -1.56671800 0.33669900 -3.42918500  
C -1.16635600 0.61205100 -2.12170100  
H 0.77829600 -2.04756900 -4.18802800  
H -1.16731900 -0.88579000 -5.16131400  
H -2.36241300 0.89724400 -3.92438100  
C -2.67199800 2.51297300 -1.24952400

|                                       |                                       |
|---------------------------------------|---------------------------------------|
| C -0.80011300 1.81124900 -0.15427300  | C 0.38523300 -4.30826900 0.03330800   |
| C -2.53069200 3.26943700 -0.06944700  | C -5.07431700 -2.19084500 -2.00240800 |
| C -3.75943700 2.71465100 -2.09812200  | C -3.18854400 -3.32099600 -2.91230700 |
| C -3.47462800 4.21776700 0.31206800   | C -4.70035800 -0.72152700 -2.06600200 |
| C -4.69590200 3.67896100 -1.72713100  | C -5.09938800 0.19817800 0.10970800   |
| H -3.88772200 2.13356400 -3.01180500  | C -0.43579600 -4.90586900 -1.08840000 |
| C -4.56127300 4.41468800 -0.53975800  | C -2.20039400 -4.40239400 -2.56169200 |
| H -3.36474100 4.77907900 1.24244300   | C -5.14738700 -2.70413200 2.32503400  |
| H -5.55825500 3.86077600 -2.37489400  | C -4.86482900 -0.49966000 1.43017900  |
| H -5.32058300 5.15670300 -0.27749500  | H -2.16007300 -4.82277000 3.70765200  |
| C 2.80026200 -2.27498300 -1.83869700  | H -3.52162300 -2.03351700 3.61601900  |
| C 1.97351200 -0.71851800 -0.38290700  | H -4.15518700 -3.66682500 3.95206800  |
| C 3.69102500 -2.15143500 -0.75631500  | H -1.53045700 -5.50804000 1.41426200  |
| C 3.06270100 -3.17107700 -2.87633300  | H -0.12125600 -5.29220100 2.49992700  |
| C 4.86624000 -2.89297300 -0.68266700  | H 1.10392200 -5.06567300 0.39944000   |
| C 4.23840500 -3.91668200 -2.80147800  | H 0.96093600 -3.45426000 -0.35340500  |
| H 2.38441500 -3.29095800 -3.72135500  | H -5.76429100 -2.36519600 -1.16154000 |
| C 5.12836700 -3.77920700 -1.72595900  | H -5.59330400 -2.47322200 -2.94141600 |
| H 5.55000200 -2.78079600 0.16155400   | H -2.64273100 -2.42479800 -3.26913700 |
| H 4.47264900 -4.62102300 -3.60464600  | H -3.82631800 -3.68613200 -3.74300700 |
| H 6.04450100 -4.37592000 -1.70559600  | H -3.92151900 -0.55958500 -2.82864300 |
| N 1.75953500 -1.40433100 -1.56333300  | H -5.58591500 -0.12942300 -2.36766500 |
| N 3.14177900 -1.21054200 0.11136100   | H -5.00248000 1.29214900 0.24688800   |
| N -1.60936600 1.62894300 -1.25329100  | H -6.13062700 -0.01276800 -0.22545300 |
| N -1.36740500 2.82208000 0.55280500   | H -0.98961300 -5.80554000 -0.74965500 |
| Co 0.71532600 0.68638500 -0.03366100  | H 0.25837400 -5.23240900 -1.89052600  |
| H 1.88089000 1.89119600 0.18291800    | H -2.74528600 -5.30103800 -2.20707000 |
| C 1.70278200 3.43856100 -2.88789600   | H -1.63323800 -4.68042100 -3.47336800 |
| C 2.53707300 2.19305700 -3.23944200   | H -5.93039600 -2.28780500 2.99031200  |
| H 2.38273800 4.29275900 -2.69194800   | H -5.51075700 -3.66502800 1.92513800  |
| H 1.94211200 1.53474700 -3.90485500   | H -3.87466100 -0.21212700 1.84219800  |
| B 1.67581000 1.95277000 -1.14554100   | H -5.62943300 -0.16050700 2.15844000  |
| O 1.06848700 3.09564600 -1.66758100   | H -1.25546000 -3.28848200 3.51088900  |
| O 2.69673400 1.52802700 -1.99787100   | C 3.78886500 -0.78807400 1.31929900   |
| K -2.19021200 -1.95519300 0.07539700  | C 3.48259800 -1.44631900 2.52904900   |
| O -2.91831700 -3.51233600 2.29438000  | C 4.75753500 0.23129000 1.24744800    |
| O -0.39271600 -3.79743400 1.09106000  | C 4.17657000 -1.05186100 3.67685400   |
| O -3.97105700 -3.03610400 -1.77943700 | C 5.42489300 0.58267000 2.42630500    |
| O -4.16759000 -0.23736100 -0.85343800 | C 5.14100200 -0.05017600 3.62886300   |
| O -1.33308500 -3.93923300 -1.56094900 | H 3.96356900 -1.54031200 4.63020900   |
| O -4.94787600 -1.88052600 1.20810100  | H 6.18322600 1.37000900 2.39672800    |
| C -1.82054100 -4.07171400 2.96623600  | H 5.67407800 0.23862400 4.53979500    |
| C -3.89631000 -2.96174600 3.13577200  | C -0.82079600 3.36753000 1.75369700   |
| C -0.93039300 -4.75700200 1.96335300  | C -0.18958300 4.62431700 1.71482700   |

C -0.93040700 2.62051000 2.94122100  
 C 0.30263700 5.13806800 2.91991900  
 C -0.40596600 3.16827800 4.11412000  
 C 0.19599900 4.42309900 4.10701900  
 H 0.79459500 6.11487600 2.92298400  
 H -0.47022800 2.60843800 5.05069000  
 H 0.59446800 4.84263300 5.03556100  
 C -1.54081500 1.23438200 2.94141500  
 C -2.41114000 0.95988200 4.16484600  
 C -0.44372600 0.17836100 2.80794600  
 H -2.18757900 1.16112400 2.05029500  
 H -3.18666000 1.73497900 4.29045100  
 H -2.91859200 -0.01526100 4.06040000  
 H -1.81935700 0.91669600 5.09534300  
 H 0.15868600 0.32936200 1.88540300  
 H 0.26193400 0.23599100 3.65377100  
 H -0.86164200 -0.84410900 2.77744900  
 C 0.00636400 5.40248400 0.42838500  
 C 1.49049000 5.67387000 0.17640800  
 C -0.79444500 6.70477200 0.42359300  
 H -0.34230500 4.77250300 -0.40299700  
 H 2.07240900 4.73824800 0.19045200  
 H 1.62569400 6.14186600 -0.81466000  
 H 1.91573200 6.36158600 0.92937500  
 H -1.87424500 6.52290800 0.55539500  
 H -0.46413400 7.38474400 1.22976000  
 H -0.65875900 7.23388900 -0.53652800  
 C 2.47674000 -2.58092600 2.60359400  
 C 1.75402000 -2.65261700 3.94667900  
 C 3.14949600 -3.92751100 2.31815200  
 H 1.71312700 -2.41234600 1.82639600  
 H 1.31459900 -1.68378000 4.23535900  
 H 0.94095000 -3.39529400 3.89230500  
 H 2.42608600 -2.97620600 4.76071200  
 H 3.58283000 -3.97282200 1.30661700  
 H 3.96142500 -4.11654500 3.04345700  
 H 2.41859700 -4.75076100 2.40996900  
 C 5.11030900 0.93498800 -0.04625400  
 C 6.48480200 0.49799300 -0.55706200  
 C 5.04359900 2.45503400 0.10013500  
 H 4.36341700 0.65962700 -0.80335800  
 H 6.53123800 -0.59180100 -0.72263400  
 H 6.70814000 0.99218200 -1.51974900  
 H 7.28655700 0.76804200 0.15451800  
 H 4.06667400 2.77616400 0.49920800  
 H 5.83273900 2.84401100 0.76863800  
 H 5.17764400 2.93370200 -0.88475200  
 C 3.87366400 2.47777000 -3.88164600  
 H 4.48559500 3.13636600 -3.24089700  
 H 4.42996600 1.53906900 -4.04624200  
 H 3.73771600 2.97082400 -4.86027400  
 C 0.68470200 3.83340600 -3.93171700  
 H 1.18173600 4.10311900 -4.88036000  
 H -0.01345400 2.99990000 -4.12522000  
 H 0.09960400 4.70548100 -3.59244700  
**<sup>1</sup>H<sub>Dipp</sub>**  
 C -0.08047900 1.69909400 1.40801000  
 C -1.27083200 2.41462500 1.56941900  
 C -1.28797600 3.71469100 2.07317700  
 C -0.06004500 4.30721700 2.39929700  
 C 1.15975400 3.64551500 2.19815800  
 C 1.12437800 2.34809800 1.68757800  
 H -2.21348200 4.27995000 2.20151600  
 H -0.05156400 5.32395800 2.80293600  
 H 2.09537800 4.16004800 2.42542400  
 C 3.57315100 1.61257400 1.37709100  
 C 1.80776500 0.34494500 0.68227200  
 C 4.06996500 0.42519400 0.80508500  
 C 4.44743200 2.57106100 1.89134500  
 C 5.43255600 0.15256400 0.74107500  
 C 5.81401500 2.30463900 1.81526400  
 H 4.08634700 3.49519300 2.34336600  
 C 6.30110700 1.11579100 1.25257800  
 H 5.79883100 -0.78362200 0.31414800  
 H 6.52079000 3.04035000 2.20972600  
 H 7.37982300 0.93875100 1.21710000  
 C -3.72133700 1.73662900 1.11237800  
 C -1.94299100 0.43692900 0.52761200  
 C -4.20532100 0.53131100 0.56282800  
 C -4.60697300 2.71596300 1.56186600  
 C -5.56564800 0.26145800 0.46196200  
 C -5.97194700 2.45199900 1.44745900  
 H -4.25469500 3.65392700 1.99271700  
 C -6.44575800 1.24642100 0.90999100  
 H -5.92265600 -0.68563200 0.05089900  
 H -6.68819900 3.20391700 1.79105500  
 H -7.52367200 1.07379600 0.84230200  
 N -2.34252200 1.62802500 1.08961500

|                                       |                                       |
|---------------------------------------|---------------------------------------|
| N -3.08813300 -0.22576700 0.22658800  | H 2.83851200 -1.34437900 -4.34097800  |
| N 2.19636800 1.51394200 1.29901000    | H 5.66444900 -0.18508700 -2.05604600  |
| N 2.96273300 -0.31711600 0.40540800   | H 5.31406700 -1.12981700 -3.53018900  |
| Co -0.07030500 0.15546300 0.39954300  | H 5.06464800 0.63709900 -3.51839100   |
| H 0.00072600 -0.33629300 -1.21050500  | C 2.49508200 -2.63614000 2.06911100   |
| C 0.84284600 2.67527800 -2.65436900   | C 3.73949100 -2.38161000 2.92441300   |
| C -0.68141900 2.83087100 -2.49225200  | C 1.73663800 -3.84926700 2.60054600   |
| H 1.06508700 2.31966700 -3.68241300   | H 1.83062000 -1.76157500 2.17663200   |
| H -0.88605300 3.64036200 -1.76125300  | H 4.27014600 -1.46314100 2.62649400   |
| B 0.01797800 1.00896600 -1.30903800   | H 3.46019200 -2.27727600 3.98818600   |
| O 1.18717900 1.64804900 -1.74632100   | H 4.44824200 -3.22543000 2.83905700   |
| O -1.09408600 1.60460300 -1.92364000  | H 0.88772500 -4.12052700 1.95033500   |
| C 3.05130300 -1.60691800 -0.20454400  | H 2.39116100 -4.73416200 2.69562400   |
| C 3.37234100 -1.69369000 -1.57075700  | H 1.33903500 -3.63082500 3.60661700   |
| C 2.85064300 -2.75083600 0.59667400   | C -3.02353800 -2.21077400 2.26708800  |
| C 3.53144800 -2.97037400 -2.12289500  | C -1.56326800 -2.14207200 2.72091300  |
| C 3.00884000 -4.00061200 -0.00777300  | C -3.82852600 -3.14120400 3.17081800  |
| C 3.35679900 -4.11164500 -1.35155800  | H -3.45266200 -1.20188200 2.38045300  |
| H 3.78690100 -3.06819100 -3.18203300  | H -0.99064000 -1.39630100 2.13664200  |
| H 2.85762200 -4.90860700 0.58003500   | H -1.49762700 -1.84488300 3.78295700  |
| H 3.48139400 -5.10133700 -1.80175900  | H -1.07329400 -3.12358600 2.60656100  |
| C -3.11898700 -1.58800600 -0.20033400 | H -4.87312200 -3.23790100 2.82649700  |
| C -3.10776900 -2.58167500 0.79788500  | H -3.39006400 -4.15349600 3.22353600  |
| C -3.15778400 -1.88936900 -1.57129500 | H -3.84672300 -2.74222700 4.20012900  |
| C -3.13211000 -3.91628600 0.38510200  | C -3.17532400 -0.80298000 -2.62633200 |
| C -3.18955300 -3.24127000 -1.93272600 | C -4.57559900 -0.63970000 -3.22052900 |
| C -3.17426500 -4.24272900 -0.96828100 | C -2.13848900 -1.04653600 -3.72082800 |
| H -3.12015200 -4.71559900 1.13061700  | H -2.89691000 0.14245500 -2.13761100  |
| H -3.22080800 -3.51419600 -2.99138000 | H -5.32113900 -0.39930000 -2.44302800 |
| H -3.19455500 -5.29349900 -1.27367800 | H -4.58582400 0.18148500 -3.95991400  |
| C 1.63887000 3.93015900 -2.37818200   | H -4.90591800 -1.56182200 -3.73358900 |
| H 2.72003000 3.73136900 -2.47737600   | H -1.13174300 -1.18337100 -3.29105500 |
| H 1.37012500 4.73035700 -3.09086900   | H -2.37807600 -1.93393400 -4.33461600 |
| H 1.44662900 4.29194200 -1.35300200   | H -2.09818800 -0.17628300 -4.39846300 |
| C -1.43002500 3.11455800 -3.77369800  | <b><sup>14</sup>K</b>                 |
| H -2.51627900 3.16239100 -3.58435900  | C -0.31402800 -1.85454200 -0.88752900 |
| H -1.11483500 4.08112900 -4.20544800  | C 0.88684200 -2.22088500 -1.49490600  |
| H -1.24191600 2.32045900 -4.51765100  | C 0.96039400 -2.60232300 -2.83728100  |
| C 3.52701200 -0.46848600 -2.44917600  | C -0.22602200 -2.60811100 -3.58296300 |
| C 2.57640300 -0.52643300 -3.64552900  | C -1.45822000 -2.26175200 -3.01123100 |
| C 4.97281200 -0.28062200 -2.90997400  | C -1.47138800 -1.89962900 -1.66371000 |
| H 3.23073900 0.41048000 -1.85877300   | H 1.89144100 -2.92171600 -3.30861400  |
| H 1.53398700 -0.67179600 -3.31737500  | H -0.19231200 -2.90949400 -4.63398200 |
| H 2.62396300 0.41964400 -4.21272900   | H -2.36623600 -2.31747300 -3.61407500 |

C -3.91725800 -1.42199400 -1.10708000  
C -2.28308200 -1.48901500 0.51048200  
C -4.51548500 -1.19856200 0.14754500  
C -4.68352400 -1.39870200 -2.27389900  
C -5.87828600 -0.94392800 0.27771100  
C -6.04914200 -1.14294500 -2.14351700  
H -4.24452700 -1.56743000 -3.25741700  
C -6.63881300 -0.91867100 -0.89165300  
H -6.33571600 -0.76782700 1.25420100  
H -6.67265600 -1.11941600 -3.04189100  
H -7.71294700 -0.72257400 -0.82968600  
C 3.28730300 -2.29466100 -0.60756500  
C 1.49007100 -1.84359900 0.74705700  
C 3.75579500 -2.06798000 0.70121800  
C 4.18167900 -2.55623400 -1.64671200  
C 5.11358600 -2.11246400 1.01060600  
C 5.54171800 -2.58982200 -1.33819500  
H 3.84552500 -2.73081700 -2.66868800  
C 6.00260800 -2.37486600 -0.03177200  
H 5.47492100 -1.95820300 2.03004600  
H 6.26204600 -2.79760900 -2.13455300  
H 7.07521500 -2.42130200 0.17671300  
N 1.91798100 -2.15976200 -0.53459800  
N 2.64248100 -1.79249000 1.47971800  
N -2.57623700 -1.60001600 -0.84433100  
N -3.50290200 -1.26663100 1.09039400  
C -3.77137400 -1.16227800 2.50160300  
H -4.00701200 -0.12427700 2.79025700  
H -4.62423300 -1.81098500 2.76266300  
H -2.89040700 -1.49226000 3.05947500  
C 2.72282000 -1.53159400 2.89416900  
H 2.61470000 -2.46222000 3.47887400  
H 3.69950200 -1.08135100 3.12784500  
H 1.93931600 -0.82083700 3.17557700  
Co -0.41347200 -1.61191500 0.95633100  
H -0.56798700 -1.89124900 4.88007900  
C -1.26380900 2.07465000 3.69110200  
C 0.18483600 2.17793100 3.20262200  
H -1.96765000 2.51264100 2.96368000  
H -1.42333000 2.53947500 4.67674400  
H 0.32809600 2.95101300 2.43592500  
H 0.89924300 2.35535600 4.02550500  
B -0.52180800 0.04065500 3.08135000  
O -1.50777500 0.67289100 3.78058500  
O 0.45555700 0.89859600 2.63298500  
N -0.47521900 -1.39710900 2.87644900  
C -0.53855000 -2.24472700 3.83406500  
C -0.57912400 -3.71174900 3.61698400  
H 0.27163000 -4.20261300 4.12657000  
H -1.49629300 -4.13846900 4.06618000  
H -0.55187800 -3.95053000 2.54150500  
K 0.44927200 1.35395700 -0.19949800  
O 0.60066500 4.16485700 0.29963500  
O -1.87308600 2.90690000 0.44999200  
O 0.88809900 1.94776100 -3.00790000  
O 2.90624400 0.75326600 -1.29709100  
O -1.66757800 1.49997500 -1.93050800  
O 2.77159700 2.56249600 0.87332500  
C -0.56001000 4.87555400 0.63450100  
C 1.78780300 4.71043100 0.80811400  
C -1.73941800 4.21867100 -0.03342800  
C -2.96092400 2.17598200 -0.06773900  
C 2.22947200 1.77175200 -3.38642100  
C -0.00957600 1.01145400 -3.55742600  
C 2.90086700 0.59734700 -2.69781700  
C 4.08384700 1.29857200 -0.76414800  
C -2.92296900 2.00394600 -1.57233000  
C -1.42156200 1.47178900 -3.31007700  
C 2.94373300 3.85480800 0.35835100  
C 3.84301600 1.67359200 0.68209100  
H -0.49356100 5.92572700 0.28438200  
H 1.75675700 4.74891500 1.91671100  
H 1.93686900 5.74454000 0.43597200  
H -1.56795500 4.22440400 -1.12635700  
H -2.65287100 4.81160100 0.17729400  
H -3.92507000 2.64600600 0.21475000  
H -2.90467500 1.18876200 0.41737600  
H 2.74604300 2.71168800 -3.12548500  
H 2.30981100 1.64177700 -4.48598200  
H 0.13138300 0.00567000 -3.11872700  
H 0.14448300 0.92579800 -4.65238600  
H 2.35550700 -0.33572200 -2.91625200  
H 3.92949200 0.47432500 -3.08638200  
H 4.90980700 0.55963000 -0.80330200  
H 4.40512900 2.18495100 -1.34668100  
H -3.10970400 2.96716500 -2.09023800  
H -3.73828200 1.31338600 -1.86771200  
H -1.56601800 2.48324000 -3.74288500

H -2.11702300 0.77591200 -3.82029700  
 H 3.88916300 4.30521800 0.72446000  
 H 2.97366100 3.84837900 -0.74927400  
 H 3.58071400 0.77028400 1.25529300  
 H 4.78103100 2.09004900 1.10381600  
 H -0.70199100 4.89710100 1.73521900  
**<sup>15</sup>K<sub>Dipp</sub>**  
 C -0.29258000 -0.47018600 -1.13214300  
 C 0.77521900 0.29445500 -1.59648000  
 C 1.74511900 -0.24648100 -2.44289100  
 C 1.60123700 -1.58652200 -2.83438800  
 C 0.53185300 -2.37776000 -2.39636000  
 C -0.40224900 -1.79813000 -1.53279700  
 H 2.59618500 0.33165100 -2.80701000  
 H 2.35053700 -2.02237000 -3.49980200  
 H 0.45139200 -3.40908500 -2.74186600  
 C -2.02480300 -3.67098700 -0.90703000  
 C -2.30232900 -1.51870900 -0.17575800  
 C -3.16446100 -3.61591600 -0.09009700  
 C -1.60743700 -4.88175000 -1.46260200  
 C -3.91417200 -4.74865400 0.21070400  
 C -2.35986300 -6.01773200 -1.16735200  
 H -0.72816800 -4.95532700 -2.10209100  
 C -3.49266300 -5.95600300 -0.34265900  
 H -4.79279400 -4.68614800 0.85623600  
 H -2.05546100 -6.98001000 -1.58873700  
 H -4.05423900 -6.86982300 -0.12953700  
 C 1.37693400 2.76528300 -1.32928900  
 C -0.36997900 1.80519400 -0.20504600  
 C 0.76863900 3.73901900 -0.52309900  
 C 2.44531000 3.09844300 -2.16041400  
 C 1.25211700 5.04200000 -0.44962400  
 C 2.91515400 4.40983400 -2.11198100  
 H 2.90242300 2.37026000 -2.82828100  
 C 2.34311300 5.36293000 -1.25543400  
 H 0.78428100 5.77891400 0.20624000  
 H 3.74863700 4.70094500 -2.75806300  
 H 2.74556700 6.37960700 -1.23365100  
 N 0.67813000 1.59632100 -1.07745800  
 N -0.30279800 3.12288400 0.11970900  
 N -1.54233300 -2.37409000 -0.94730600  
 N -3.31271300 -2.29125700 0.31348100  
 Co -1.54754000 0.28028700 0.04225500  
 H -4.12581500 0.15404200 -0.16523400  
 C -2.93913000 -0.25581000 -4.08584600  
 C -1.65393300 0.58700300 -4.21372500  
 H -3.74390800 0.20726200 -4.69235900  
 H -0.77505500 -0.07372600 -4.06831200  
 B -2.58400700 0.93328400 -2.18322500  
 O -3.29830300 -0.12951200 -2.71814000  
 O -1.71690000 1.48149400 -3.11610800  
 N -2.81476100 1.57985900 -0.92715200  
 C -3.52424000 1.04628400 0.05009900  
 C -4.02751000 1.82933300 1.22398300  
 H -4.97482900 2.33376200 0.94478900  
 H -4.25661200 1.15774700 2.06810600  
 H -3.31659600 2.59947600 1.55049800  
 B -0.35001100 -0.50476100 1.37810600  
 O -0.40355000 -1.84420200 1.76576400  
 O 0.88552700 0.03364200 1.76274400  
 C 0.86490300 -2.25594600 2.22989100  
 C 1.58515000 -0.92731300 2.53668400  
 H 0.72290600 -2.84927200 3.15098300  
 H 2.63162900 -0.95366900 2.19144100  
 H -1.50032300 0.24086500 1.63228200  
 K 4.16929100 -0.94263800 -0.00625800  
 O 4.43600600 0.66324200 2.36758700  
 O 5.07785300 -3.55420100 0.34074000  
 O 4.44501100 1.70973300 -0.27384000  
 C 5.19255400 0.09537300 3.40955600  
 C 4.67418900 2.02919900 2.12788800  
 C 5.25523300 -4.38682600 -0.77523500  
 C 5.92564100 -3.85891500 1.41688700  
 C 5.67467900 2.13640800 -0.79741100  
 C 3.97035200 2.41625400 0.84808200  
 C 6.45945900 -0.55081800 2.88354700  
 H 4.55155500 -0.65647500 3.90221500  
 H 5.44793300 0.85226300 4.17557300  
 H 4.27129800 2.64519000 2.95663100  
 H 5.76109800 2.23500800 2.06158900  
 C 4.47406600 -3.82030300 -1.94221600  
 H 6.33384500 -4.46597400 -1.01911400  
 H 4.89326600 -5.41520000 -0.57045100  
 C 5.79500300 -2.79828900 2.47814400  
 H 6.97816900 -3.89886100 1.07126400  
 H 5.67068200 -4.84503700 1.85509500  
 C 5.92641900 1.41977600 -2.09967900  
 H 5.65851600 3.22770100 -0.98981500



|               |             |             |               |             |             |
|---------------|-------------|-------------|---------------|-------------|-------------|
| H 6.50734700  | 1.92621100  | -0.09632500 | H -3.68607700 | 6.11884500  | 2.87489900  |
| H 2.90176600  | 2.16265300  | 0.93747000  | C -4.46522000 | -1.88821900 | 1.06980100  |
| H 4.05430400  | 3.50812600  | 0.68715300  | C -5.65975800 | -1.61039600 | 0.36931900  |
| O 6.20341400  | -1.56578500 | 1.94244700  | C -4.40084400 | -1.87120500 | 2.47326700  |
| H 7.07850000  | 0.19840500  | 2.36151500  | C -6.78838600 | -1.27347000 | 1.12106400  |
| H 7.05664400  | -0.94618600 | 3.73021400  | C -5.55915400 | -1.52041500 | 3.17693300  |
| O 4.76167600  | -2.47218500 | -2.21290500 | C -6.74058400 | -1.22021300 | 2.51097000  |
| H 4.65465700  | -4.45211100 | -2.83554900 | H -7.72609300 | -1.04630800 | 0.60668400  |
| H 3.39476900  | -3.85114500 | -1.71810000 | H -5.53409000 | -1.49509400 | 4.27021600  |
| H 4.74775000  | -2.75655400 | 2.84286100  | H -7.63641300 | -0.95015700 | 3.07839200  |
| H 6.43475200  | -3.08312600 | 3.33730800  | C -3.15140300 | -2.26390900 | 3.23014000  |
| O 5.95156900  | 0.03467000  | -1.87546800 | C -3.35446500 | -3.58992300 | 3.96555900  |
| H 5.13135000  | 1.67342400  | -2.82909200 | C -2.69091100 | -1.16559900 | 4.18683700  |
| H 6.89204900  | 1.76884000  | -2.51902000 | H -2.34488300 | -2.40676100 | 2.49913400  |
| C 6.05063600  | -2.19093700 | -2.69552500 | H -3.64210700 | -4.39694100 | 3.26927000  |
| C 6.12378100  | -0.72672400 | -3.04230800 | H -2.41941800 | -3.89763500 | 4.46814500  |
| H 6.82648500  | -2.42199800 | -1.93928400 | H -4.14142500 | -3.51355600 | 4.73794500  |
| H 6.26745400  | -2.78745100 | -3.60462400 | H -2.52308100 | -0.21726700 | 3.64924600  |
| H 7.10837400  | -0.51569200 | -3.50699800 | H -3.42426900 | -0.97963600 | 4.99245000  |
| H 5.33693100  | -0.47939700 | -3.78393400 | H -1.73984500 | -1.45499800 | 4.66839600  |
| C 1.57875600  | -0.54894200 | 4.00208300  | C -5.75189900 | -1.67183700 | -1.14513700 |
| H 2.14634400  | -1.28668100 | 4.59711700  | C -6.43541400 | -0.44140600 | -1.74169900 |
| H 2.03971100  | 0.44275100  | 4.14134700  | C -6.46405000 | -2.94697100 | -1.60383900 |
| H 0.54578100  | -0.51287400 | 4.38910900  | H -4.72763600 | -1.68811500 | -1.54711200 |
| C 1.55863100  | -3.10163900 | 1.17954500  | H -5.97238000 | 0.49512300  | -1.38999900 |
| H 1.66403900  | -2.53259900 | 0.23820800  | H -6.34608500 | -0.46156100 | -2.84133100 |
| H 2.55604700  | -3.43334600 | 1.51850800  | H -7.51221000 | -0.40720800 | -1.49747700 |
| H 0.96024600  | -3.99986700 | 0.95058000  | H -5.95501300 | -3.85569800 | -1.24301900 |
| C -2.78552400 | -1.70510100 | -4.48118600 | H -7.50744600 | -2.97335400 | -1.24013800 |
| H -3.72722700 | -2.25667800 | -4.31782700 | H -6.49051500 | -2.99284400 | -2.70758800 |
| H -2.52307800 | -1.78820100 | -5.55082000 | C -2.27142900 | 4.71380300  | -1.35155900 |
| H -1.98993900 | -2.18595600 | -3.88708400 | C -1.73523500 | 6.02412900  | -1.93371200 |
| C -1.51168900 | 1.33843800  | -5.51503300 | C -3.70610900 | 4.48711700  | -1.83087700 |
| H -0.58317100 | 1.93473900  | -5.51545200 | H -1.66989600 | 3.88040800  | -1.74210700 |
| H -1.47171700 | 0.63906400  | -6.36872100 | H -0.67659500 | 6.19241300  | -1.67928800 |
| H -2.36351800 | 2.02559600  | -5.66207600 | H -1.81466500 | 6.00876800  | -3.03551300 |
| C -1.25061800 | 3.88974200  | 0.86893300  | H -2.31551800 | 6.89105100  | -1.56796800 |
| C -1.18360700 | 3.87263100  | 2.27444200  | H -4.14496400 | 3.59577000  | -1.35781000 |
| C -2.17237400 | 4.68927100  | 0.16299300  | H -4.35397600 | 5.35728200  | -1.61985900 |
| C -2.07918100 | 4.68425800  | 2.97768900  | H -3.71209000 | 4.32817900  | -2.92368600 |
| C -3.03645800 | 5.48982400  | 0.91792500  | C -0.16097500 | 3.02709700  | 3.00740900  |
| C -2.99424400 | 5.48938300  | 2.30692000  | C -0.67357200 | 2.49946700  | 4.34375400  |
| H -2.06351600 | 4.68864000  | 4.06997600  | C 1.14514100  | 3.80292000  | 3.19759500  |
| H -3.76811100 | 6.11887600  | 0.40334400  | H 0.06497200  | 2.15058500  | 2.38168400  |

H -1.63380400 1.96809200 4.22581000  
H 0.05385200 1.78996700 4.77145600  
H -0.81561600 3.30373300 5.08709500  
H 1.56463000 4.13929500 2.23384800  
H 0.98672900 4.69828400 3.82613100  
H 1.89980000 3.16728400 3.69655900  
**<sup>12</sup>**  
C 0.00114000 1.18642300 -0.03249800  
C 1.19981300 1.86368800 0.18742300  
C 1.22847600 3.20490300 0.57113900  
C 0.00308200 3.86308100 0.74543200  
C -1.22329900 3.20783700 0.56707600  
C -1.19669000 1.86647100 0.18378700  
H 2.16146200 3.74430300 0.74720100  
H 0.00384000 4.91522500 1.04551700  
H -2.15557000 3.74950900 0.73991600  
C -3.63878200 1.04761400 0.14332500  
C -1.86862100 -0.31994200 -0.31149300  
C -4.11847600 -0.25496300 -0.10647100  
C -4.52036600 2.08258800 0.45116200  
C -5.47498100 -0.55959100 -0.04873200  
C -5.88115700 1.77683100 0.50624600  
H -4.17054700 3.09738500 0.64388000  
C -6.35274900 0.47973100 0.26223700  
H -5.83764700 -1.57335900 -0.23532300  
H -6.59399500 2.57065500 0.74775300  
H -7.42632500 0.27734700 0.31774100  
C 3.64062700 1.04025200 0.14923300  
C 1.86831900 -0.32389600 -0.30789600  
C 4.11841200 -0.26233500 -0.10414700  
C 4.52369200 2.07316200 0.45988300  
C 5.47451700 -0.56901400 -0.04744200  
C 5.88402900 1.76531500 0.51399100  
H 4.17534100 3.08790900 0.65551500  
C 6.35375600 0.46820700 0.26633100  
H 5.83571600 -1.58277200 -0.23689300  
H 6.59801000 2.55745000 0.75765100  
H 7.42705000 0.26417300 0.32120800  
N 2.26738400 0.95927200 0.01017500  
N 3.01241500 -1.04585400 -0.38786000  
N -2.26572200 0.96451800 0.00400100  
N -3.01374000 -1.04065000 -0.38871700  
C -3.07485400 -2.45197600 -0.65630700  
H -3.41297800 -3.00051200 0.23870600

H -3.76375500 -2.65416300 -1.49476800  
H -2.06437900 -2.79172700 -0.92057000  
C 3.07252300 -2.45580300 -0.66395000  
H 3.75802900 -2.65260600 -1.50647300  
H 3.41379300 -3.00958700 0.22646000  
H 2.06101400 -2.79445800 -0.92558200  
Co -0.00091500 -0.61571300 -0.51214400  
H -0.00443700 -2.19583600 -0.21428500  
C -0.75681200 -2.61449300 3.06208000  
C 0.74180500 -2.32548400 3.16902500  
H -1.33229800 -2.22955200 3.92255500  
H -0.95563500 -3.70273400 2.97872000  
H 0.93916500 -1.44707800 3.81565400  
H 1.31886900 -3.17849100 3.56863400  
B -0.00821100 -1.67789700 1.10977000  
O -1.15205200 -1.96425000 1.87775500  
O 1.13381500 -2.04452200 1.84756500  
N 0.00376200 -0.71029800 -2.43631700  
C 0.00826300 -0.72784700 -3.59260700  
C 0.01477500 -0.73570400 -5.04217000  
H 0.91123600 -0.21591700 -5.42099200  
H 0.01860400 -1.77096900 -5.42344300  
H -0.88024500 -0.21953900 -5.42922100  
**<sup>14</sup>Dipp**  
C -0.07822700 2.84354300 -0.10897900  
C 1.11953400 3.54935600 -0.13793600  
C 1.15602300 4.92900000 -0.34560500  
C -0.06186200 5.59168400 -0.54774200  
C -1.28687900 4.91163800 -0.55749000  
C -1.26608600 3.53461300 -0.33437100  
H 2.08682700 5.49803100 -0.36974500  
H -0.05459900 6.67262100 -0.71580600  
H -2.20893700 5.46419900 -0.74698100  
C -3.72561200 2.77677000 -0.24377000  
C -1.98242000 1.30749700 -0.12690600  
C -4.23709500 1.48942300 0.00482700  
C -4.58194600 3.87434800 -0.34298700  
C -5.59602400 1.26046600 0.19463400  
C -5.94605300 3.64208000 -0.17535700  
H -4.20961400 4.88047100 -0.53661800  
C -6.44686600 2.35965400 0.09480500  
H -5.97063300 0.26077100 0.42399200  
H -6.64029700 4.48416400 -0.24826000  
H -7.52264200 2.21992700 0.23393600

|                |             |             |               |             |             |
|----------------|-------------|-------------|---------------|-------------|-------------|
| C 3.57419500   | 2.81316400  | 0.05430600  | H -2.85647300 | -2.55646800 | 3.33369300  |
| C 1.84647200   | 1.31493500  | 0.07324200  | H -4.30474600 | -3.79167300 | -0.51608400 |
| C 4.10522500   | 1.51517000  | 0.14216300  | H -3.74894000 | -4.31594600 | 1.83957400  |
| C 4.41727500   | 3.92643300  | 0.04575800  | C 3.22702600  | -0.78305900 | 0.16369500  |
| C 5.47420700   | 1.28195900  | 0.23738600  | C 3.60903800  | -1.42480600 | -1.02875600 |
| C 5.78845400   | 3.69429600  | 0.13025000  | C 3.15150400  | -1.46610800 | 1.39269400  |
| H 4.03079100   | 4.94367800  | -0.01551300 | C 3.93792800  | -2.78297400 | -0.96244700 |
| C 6.31114100   | 2.39545000  | 0.22770700  | C 3.49803900  | -2.81908900 | 1.40435500  |
| H 5.86645600   | 0.26650200  | 0.32449900  | C 3.89644600  | -3.47226100 | 0.24216300  |
| H 6.47198400   | 4.54818200  | 0.12668100  | H 4.22955300  | -3.30764900 | -1.87657900 |
| H 7.39323100   | 2.25455200  | 0.30057400  | H 3.45086400  | -3.37789700 | 2.34113500  |
| N 2.20177500   | 2.64571900  | 0.01294100  | H 4.16284900  | -4.53314000 | 0.27598400  |
| N 3.02270500   | 0.63664500  | 0.14271000  | C -4.05643700 | -1.43249300 | -1.83161400 |
| N -2.35138300  | 2.62174500  | -0.30385000 | C -5.53448600 | -1.63832300 | -2.16366100 |
| N -3.14293700  | 0.62731300  | 0.05399700  | C -3.16905700 | -2.28070500 | -2.74494500 |
| Co -0.07220500 | 0.97360500  | -0.04080500 | H -3.81748200 | -0.37426800 | -2.02286500 |
| C -0.27898900  | -4.12773100 | 0.34785400  | H -6.18699800 | -0.99270400 | -1.55204800 |
| C 0.33756600   | -4.34999500 | -1.04547100 | H -5.72476500 | -1.39863100 | -3.22512800 |
| H -1.36435500  | -4.34922500 | 0.28975500  | H -5.84285100 | -2.68654800 | -1.99857100 |
| H 1.41343300   | -4.59818500 | -0.93023900 | H -2.10507900 | -2.19548400 | -2.47171100 |
| B 0.03335900   | -2.12867100 | -0.66540100 | H -3.44657300 | -3.34914000 | -2.68921900 |
| O -0.12251600  | -2.74467500 | 0.58096500  | H -3.28474900 | -1.96289900 | -3.79668300 |
| O 0.23358300   | -3.08665400 | -1.66949100 | C 3.66749200  | -0.71542500 | -2.36802100 |
| N -0.04091700  | -0.77558700 | -0.88077800 | C 2.83384000  | -1.45012700 | -3.42181500 |
| C 0.13512400   | 0.19582000  | -1.80295400 | C 5.10651600  | -0.53245700 | -2.85433900 |
| C -0.86954900  | 0.48777500  | -2.88559100 | H 3.23289900  | 0.28802100  | -2.23449800 |
| H -1.90447200  | 0.35175500  | -2.53919200 | H 1.84345000  | -1.73889500 | -3.03342900 |
| H -0.75259000  | 1.52028800  | -3.26080100 | H 2.69508800  | -0.81055900 | -4.31167000 |
| H -0.70709200  | -0.19730400 | -3.74273900 | H 3.33996500  | -2.37341200 | -3.75754700 |
| H 1.16329200   | 0.38537700  | -2.16202600 | H 5.70702600  | 0.06597000  | -2.14942700 |
| C 0.33126600   | -4.95111500 | 1.45745400  | H 5.60761900  | -1.50846600 | -2.98758500 |
| H -0.15093600  | -4.71573100 | 2.42202300  | H 5.11727500  | -0.01353100 | -3.82975200 |
| H 0.19515100   | -6.03016100 | 1.26310700  | C -2.36977200 | 0.08140700  | 2.73681000  |
| H 1.41065400   | -4.74264500 | 1.54798500  | C -0.84214300 | 0.07710300  | 2.66606300  |
| C -0.33947800  | -5.42046700 | -1.87000200 | C -2.84267600 | -0.00902100 | 4.18481700  |
| H 0.12572100   | -5.49347600 | -2.86812600 | H -2.72205800 | 1.05012500  | 2.34749100  |
| H -0.25651900  | -6.40726500 | -1.38024000 | H -0.48545400 | -0.03959800 | 1.61679500  |
| H -1.40951100  | -5.18310500 | -2.00606000 | H -0.41723800 | 0.99327600  | 3.10962700  |
| C -3.25499400  | -0.72902500 | 0.49694600  | H -0.43471500 | -0.79803800 | 3.19583200  |
| C -2.93414300  | -1.00209200 | 1.84037000  | H -3.94463800 | -0.03115000 | 4.25047300  |
| C -3.74912600  | -1.71270500 | -0.37414400 | H -2.45044500 | -0.90576300 | 4.69600000  |
| C -3.10838800  | -2.30865400 | 2.29949800  | H -2.48664500 | 0.86907400  | 4.75204300  |
| C -3.92354600  | -3.00251000 | 0.13871000  | C 2.72445500  | -0.76417800 | 2.66833500  |
| C -3.60958300  | -3.29902200 | 1.46008900  | C 3.89528600  | -0.02853100 | 3.32607400  |

C 2.06371100 -1.70905200 3.66826900  
H 1.97096000 -0.01206900 2.38182600  
H 4.34294400 0.72537300 2.65837600  
H 3.55799700 0.49133100 4.24088400  
H 4.69062700 -0.74025500 3.61333600  
H 1.27246100 -2.30803000 3.18701200  
H 2.79346300 -2.39997600 4.12751300  
H 1.61099500 -1.12855200 4.49060600

**<sup>1</sup>TS1**

C 0.00158100 1.14354800 -0.39632600  
C 1.20424100 1.83915100 -0.35010500  
C 1.23464600 3.23284700 -0.28613600  
C 0.01024600 3.91368600 -0.26226500  
C -1.21860100 3.24117400 -0.28887600  
C -1.19658900 1.84734300 -0.35245100  
H 2.16769100 3.79815000 -0.25459300  
H 0.01395200 5.00662900 -0.21480800  
H -2.14840700 3.81194800 -0.25799500  
C -3.64197500 1.05395600 -0.22923300  
C -1.88555400 -0.39265700 -0.36854200  
C -4.13108500 -0.26616400 -0.17845400  
C -4.51556000 2.13855100 -0.16466800  
C -5.48989600 -0.54225500 -0.06345000  
C -5.87785500 1.86189000 -0.04783000  
H -4.15928400 3.16834500 -0.20564700  
C -6.35951600 0.54614500 0.00237500  
H -5.86049500 -1.56953600 -0.02933000  
H -6.58559300 2.69433800 0.00332600  
H -7.43521900 0.36942900 0.09192800  
C 3.64415500 1.03303400 -0.22841400  
C 1.88254100 -0.40476100 -0.39134200  
C 4.12899700 -0.28915900 -0.20140000  
C 4.52141900 2.11311800 -0.14051500  
C 5.48663100 -0.57211200 -0.08930400  
C 5.88248300 1.82969900 -0.02569000  
H 4.16910800 3.14482300 -0.16037000  
C 6.35983500 0.51173700 -0.00036700  
H 5.85389300 -1.60103000 -0.07366300  
H 6.59263500 2.65870600 0.04443500  
H 7.43468100 0.32967900 0.08871500  
N 2.27121700 0.91607400 -0.35042100  
N 3.02447500 -1.12157300 -0.30193300  
N -2.26908400 0.93036600 -0.34682100  
N -3.02934100 -1.10387000 -0.26271800

C -3.10121000 -2.53569500 -0.15153500  
H -3.69258900 -2.81263400 0.73700100  
H -3.56197800 -2.98163100 -1.05031400  
H -2.07963200 -2.91775800 -0.02718400  
C 3.09591000 -2.55574000 -0.22729300  
H 3.57183800 -2.97697500 -1.12998100  
H 3.67261000 -2.85722600 0.66316700  
H 2.07315500 -2.94338400 -0.13348200  
Co -0.00439000 -0.71506300 -0.49663000  
H -0.00697100 -2.26913900 -0.40162500  
C -0.71786100 -1.29955700 3.55863400  
C 0.75491700 -0.87774600 3.58205800  
H -1.34987800 -0.69368700 4.23026300  
H -0.84978700 -2.36374700 3.83340300  
H 0.88869100 0.13735300 4.00094500  
H 1.39313800 -1.57088500 4.15681000  
B 0.00618100 -0.91430800 1.42199300  
O -1.11874600 -1.10961300 2.21501600  
O 1.14240600 -0.87639900 2.22140500  
N -0.01896800 -1.10300900 -2.53119400  
C -0.02179800 -2.17754500 -1.98443900  
C -0.03737000 -3.62807000 -2.29037100  
H -0.02213400 -3.77783300 -3.38255600  
H 0.83701800 -4.12909900 -1.84120700  
H -0.94256700 -4.10092200 -1.87232200

**HBpin**

C -0.68321700 -0.36713700 -0.36607700  
C 0.68319400 -0.36716600 0.36606800  
H -0.55832700 -0.74334000 -1.39884600  
H 0.55826600 -0.74339900 1.39881900  
B 0.00006800 1.75285600 -0.00008800  
H 0.00000000 2.96152100 0.00010700  
O 1.04393200 1.01352900 0.45919400  
O -1.04392800 1.01356700 -0.45913200  
C 1.76487400 -1.15694700 -0.33207000  
H 2.71772900 -1.08326300 0.21878500  
H 1.48369200 -2.22316200 -0.39370500  
H 1.92410600 -0.77701800 -1.35666900  
C -1.76489100 -1.15691900 0.33206400  
H -2.71772300 -1.08324300 -0.21883000  
H -1.48370600 -2.22313300 0.39370900  
H -1.92416900 -0.77699100 1.35665800

**<sup>1</sup>2K**

C -0.17278400 -1.43775800 -0.64953000

C -1.36794000 -1.48187000 -1.37638100  
C -1.39393000 -1.79142900 -2.73588800  
C -0.17825900 -2.09224400 -3.36624200  
C 1.03887100 -2.08460100 -2.66962200  
C 1.01831100 -1.74859200 -1.31536600  
H -2.32195400 -1.82186600 -3.30958500  
H -0.18068900 -2.35334300 -4.42843600  
H 1.95952600 -2.35941600 -3.18819800  
C 3.44473300 -1.83215100 -0.48722600  
C 1.68130300 -1.41175500 0.89810000  
C 3.93074100 -1.64962100 0.82249200  
C 4.32278000 -2.06192500 -1.54454500  
C 5.29059000 -1.69859000 1.11454000  
C 5.68728900 -2.10676700 -1.25352000  
H 3.96895600 -2.20111300 -2.56652100  
C 6.16550600 -1.93080400 0.05236100  
H 5.66012900 -1.56054400 2.13354500  
H 6.39803500 -2.28815200 -2.06479600  
H 7.24130600 -1.97839100 0.24336500  
C -3.81016700 -1.19631600 -0.63541000  
C -2.05069400 -1.02026900 0.81169300  
C -4.30795000 -0.96417200 0.66271100  
C -4.67896900 -1.31656200 -1.71908500  
C -5.67123200 -0.84342700 0.91480400  
C -6.04629800 -1.20124400 -1.46516600  
H -4.31608400 -1.49606900 -2.73148400  
C -6.53621500 -0.96902000 -0.17219200  
H -6.04819400 -0.65941400 1.92369100  
H -6.75087900 -1.29658200 -2.29624700  
H -7.61489100 -0.88579700 -0.01210000  
N -2.43327600 -1.20994400 -0.50300200  
N -3.20862200 -0.86615600 1.50066200  
N 2.07472600 -1.68668400 -0.39486700  
N 2.82789500 -1.40769500 1.62749100  
C 2.89196100 -1.27606700 3.05864400  
H 3.50141900 -2.09099100 3.48348100  
H 3.33581100 -0.30829100 3.35551600  
H 1.87254200 -1.35402800 3.45893700  
C -3.29372600 -0.65922900 2.92128300  
H -3.52757400 0.39525200 3.15392800  
H -4.07676900 -1.30684600 3.34813200  
H -2.32788900 -0.93018800 3.36864700  
Co -0.19091800 -1.20488600 1.20119500  
C 0.14206000 -5.28403400 0.51591900

C -1.33231500 -4.99468200 0.20535300  
H 0.70564300 -5.61663200 -0.37266600  
H 0.25732700 -6.05245100 1.30417800  
H -1.49464200 -4.81940600 -0.87529400  
H -2.00866900 -5.80442600 0.52862500  
B -0.40667400 -3.18372900 1.20546700  
O 0.65645100 -4.05339200 0.98219500  
O -1.61775500 -3.81068100 0.92048900  
N -0.05375100 0.16255400 2.53343000  
C 0.03751600 0.87890400 3.44134800  
C 0.15949100 1.67848300 4.64482400  
H 1.19385800 2.04284100 4.76361900  
H -0.52000900 2.54628600 4.61159000  
H -0.09784000 1.06724200 5.52836700  
K 0.19999300 1.79345500 -0.31138600  
O -0.02194800 4.10514400 1.25984400  
O -2.34680500 2.69977400 0.54353200  
O 0.89386000 2.49953300 -2.93964100  
O 2.77348900 1.12428800 -1.18899700  
O -1.77716600 2.03951000 -2.15510400  
O 2.52430400 3.48335100 0.23925700  
C -1.24490100 4.26961500 1.92509800  
C 1.12016700 4.34426400 2.03669000  
C -2.36610800 4.04197000 0.94657100  
C -3.33419200 2.33684900 -0.39114300  
C 2.26120700 2.33048200 -3.22558300  
C 0.01408600 1.69295200 -3.68514700  
C 2.85396800 1.08402600 -2.59462500  
C 3.86639300 1.71382900 -0.53200100  
C -2.97975400 2.67864700 -1.82109400  
C -1.39206900 2.20044600 -3.49507000  
C 2.29363800 4.56003100 1.10658800  
C 3.37655200 2.46025300 0.68389000  
H -1.32908000 5.29530400 2.33838100  
H 1.30601000 3.49531700 2.72715400  
H 0.99336300 5.25543000 2.65661000  
H -2.23853900 4.72829500 0.08604200  
H -3.32934000 4.28718300 1.43919400  
H -4.30809400 2.79812400 -0.13492600  
H -3.44552000 1.24714700 -0.30769100  
H 2.76543900 3.22876900 -2.83171700  
H 2.42646200 2.30131500 -4.32248600  
H 0.07289000 0.62889000 -3.37993800  
H 0.26070500 1.74778000 -4.76497300

H 2.29557800 0.18973000 -2.91608700  
H 3.90123700 0.95506200 -2.92922900  
H 4.59759800 0.93810100 -0.23041000  
H 4.38105000 2.43594700 -1.19303300  
H -2.88349800 3.77478000 -1.96867200  
H -3.80832300 2.32973600 -2.47167500  
H -1.43596100 3.27117700 -3.78020000  
H -2.07240100 1.63631200 -4.16513900  
H 3.19850700 4.79209900 1.70248200  
H 2.07324500 5.43052600 0.46597300  
H 2.85517800 1.76204800 1.37355300  
H 4.24960800 2.87799100 1.22436800  
H -1.33905100 3.55144200 2.76537600  
H -0.36944800 -2.40176300 2.30643500

**<sup>3</sup>TS4**

C 0.25318300 -1.78516700 -0.26057800  
C 1.49815200 -2.37062600 -0.03426900  
C 1.65265900 -3.71605400 0.30483600  
C 0.49724400 -4.48381900 0.48487500  
C -0.77384900 -3.90327400 0.42379300  
C -0.85862500 -2.55182800 0.08356700  
H 2.63259200 -4.16387900 0.48428600  
H 0.59200100 -5.54083400 0.75089500  
H -1.65264300 -4.49365900 0.69298100  
C -3.36368100 -2.01825900 0.14839500  
C -1.77967000 -0.38948700 0.31209900  
C -4.00339000 -0.76791300 0.22434000  
C -4.10535100 -3.19200500 0.00985000  
C -5.39065700 -0.64810300 0.19365000  
C -5.49387700 -3.07235200 -0.02432900  
H -3.62762600 -4.16815400 -0.08144100  
C -6.12821900 -1.82442400 0.07217300  
H -5.87962500 0.32642900 0.26224100  
H -6.10164800 -3.97552100 -0.13103300  
H -7.22052700 -1.77319700 0.04702500  
C 3.89126700 -1.47104500 -0.20671500  
C 2.10224600 -0.08986100 0.07310600  
C 4.34039600 -0.13755800 -0.21416900  
C 4.78673400 -2.52623100 -0.38731000  
C 5.68700700 0.18367200 -0.37019900  
C 6.13352300 -2.20435600 -0.54677000  
H 4.45579800 -3.56486300 -0.41594700  
C 6.57950200 -0.87394600 -0.53217400  
H 6.02978300 1.22082800 -0.36360700

H 6.85864800 -3.01101500 -0.68812700  
H 7.64575000 -0.66272700 -0.65420000  
N 2.52057500 -1.39281900 -0.03839400  
N 3.21894000 0.66069000 -0.05789700  
N -2.00997100 -1.73785900 0.19924700  
N -3.00311700 0.18715800 0.31201900  
C -3.27152300 1.60169600 0.37186300  
H -3.91477300 1.89174600 -0.47637100  
H -3.77386400 1.86047500 1.31854900  
H -2.31530000 2.13165900 0.31209600  
C 3.26118900 2.10098100 -0.05849900  
H 3.61686300 2.48446400 0.91108900  
H 3.93141600 2.44389500 -0.86377300  
H 2.24339900 2.46030000 -0.24784700  
Co 0.10659200 0.22557300 -0.08345400  
H 0.95381900 3.72673500 0.85643200  
C -1.53728900 1.03567300 -3.36662300  
C -1.37479100 2.50980400 -3.75991900  
H -1.18065200 0.33708000 -4.14131800  
H -2.59085100 0.78600700 -3.13291800  
H -0.56267300 2.64162000 -4.50088600  
H -2.29780400 2.94303400 -4.18213100  
B -0.58941400 2.20567700 -1.65934200  
O -0.75058500 0.91869300 -2.20141500  
O -1.03324400 3.16868100 -2.55745500  
N -0.06451800 2.36991700 -0.38332600  
C 0.19316300 3.72928800 0.05516900  
C -1.03439700 4.48479100 0.55524800  
H -1.49439100 3.97675400 1.41893300  
H -0.76149400 5.51123500 0.86457600  
H -1.79319700 4.56317900 -0.24241900  
B 0.10303600 1.29951100 1.53801800  
O -1.01391800 1.58352300 2.31536900  
O 1.25056000 1.76763100 2.16692200  
C -0.59739400 2.16204500 3.53442000  
C 0.88062500 2.50478500 3.31612400  
H -1.21240400 3.04949300 3.76445800  
H -0.73624300 1.42942300 4.35177400  
H 1.03202300 3.58545400 3.13133900  
H 1.51896600 2.21267800 4.16755100  
H 0.63765500 4.31856200 -0.77295200

**<sup>1</sup>TS2W<sub>Co</sub>**

C -0.00227300 -0.07396000 0.49279600  
C -1.21659900 -0.63846500 0.93471900

C -1.25651400 -1.73983600 1.82704700  
C -0.01103800 -2.29612600 2.22812600  
C 1.24195900 -1.74532200 1.83093800  
C 1.21021100 -0.65010300 0.93626500  
H -2.18481300 -2.17041900 2.19782200  
H -0.01445000 -3.16063400 2.89516300  
H 2.16676400 -2.17937300 2.20639500  
C 3.65206000 -0.06931000 0.42703900  
C 1.89967500 1.20614600 -0.31048100  
C 4.15009700 1.01029400 -0.32465300  
C 4.51166700 -1.02133000 0.97168900  
C 5.51455100 1.18833900 -0.53367100  
C 5.87808300 -0.84492600 0.75782100  
H 4.14565900 -1.88120000 1.53350300  
C 6.37307300 0.24212300 0.02346100  
H 5.89771300 2.03314000 -1.11045100  
H 6.57810700 -1.57653700 1.17095500  
H 7.45213100 0.34728400 -0.12011400  
C -3.65560400 -0.03919300 0.43044500  
C -1.89507000 1.22267800 -0.31026100  
C -4.14689500 1.04251000 -0.32284000  
C -4.52140300 -0.98463600 0.97683700  
C -5.51031500 1.22921500 -0.53139500  
C -5.88664600 -0.79957400 0.76340800  
H -4.16101000 -1.84643800 1.53925600  
C -6.37482100 0.28962800 0.02759900  
H -5.88824600 2.07555900 -1.10936700  
H -6.59123400 -1.52612400 1.17771200  
H -7.45322200 0.40163500 -0.11573200  
N -2.27999000 0.11422800 0.42072900  
N -3.04288200 1.76606700 -0.75850500  
N 2.27741800 0.09348900 0.41851400  
N 3.05093900 1.74248600 -0.75809900  
C 3.15255600 2.93109400 -1.56782600  
H 3.92389800 2.78425300 -2.34050800  
H 2.17944000 3.10764900 -2.04430200  
H 3.41570300 3.80295200 -0.94466600  
C -3.13673500 2.95192800 -1.57342400  
H -2.16469000 3.11663100 -2.05605500  
H -3.91331700 2.80865900 -2.34148500  
H -3.38823400 3.82952500 -0.95361200  
Co 0.00506500 1.52462600 -0.44084400  
H -0.01208900 5.04284100 -0.20638200  
C 0.79069600 4.00684500 2.71110000

C -0.72674200 3.82428800 2.85267100  
H 1.33919600 3.77225300 3.63930800  
H 1.05861100 5.03613400 2.40638000  
H -0.98903200 3.20229000 3.72895800  
H -1.26841200 4.78174400 2.93869600  
B 0.01882800 2.66953200 1.04216900  
O 1.16387700 3.10329600 1.68645100  
O -1.11637900 3.15266800 1.66876700  
N 0.00974400 3.19827100 -1.17116500  
C 0.00370500 4.45458000 -1.15671400  
C 0.01128600 5.31085700 -2.39465000  
H 0.02299400 4.68448400 -3.30230200  
H -0.87932300 5.96809200 -2.42127700  
H 0.89538600 5.97726000 -2.40465400  
W -0.00952400 -2.43613100 -0.12150600  
C 0.08613900 -4.40536400 -0.11314600  
O 0.14376400 -5.56288700 -0.06332200  
C -1.42717800 -2.57903300 -1.48544800  
O -2.28683300 -2.61592600 -2.26223000  
C 1.30847400 -2.44391600 -1.59162500  
O 2.10824100 -2.39575900 -2.42906000  
**<sup>1</sup>TS1W<sub>Co</sub>**  
C 0.00005600 -0.05009300 -0.53170700  
C -1.23619700 0.45082700 -0.97892100  
C -1.31440500 1.52486700 -1.90201600  
C -0.08596300 2.11883300 -2.31011200  
C 1.18627800 1.63682900 -1.88888000  
C 1.19167800 0.56132000 -0.96466200  
H -2.25500000 1.90484300 -2.29631000  
H -0.12024900 2.96334100 -3.00167000  
H 2.09535000 2.10124500 -2.26661100  
C 3.65455400 0.00451700 -0.50919100  
C 1.93131600 -1.28582800 0.26717300  
C 4.18098400 -1.10483300 0.17749500  
C 4.49310000 0.97266800 -1.05669600  
C 5.55155400 -1.29076600 0.32616500  
C 5.86730100 0.78649800 -0.90674900  
H 4.10402900 1.85377100 -1.56825700  
C 6.38932000 -0.32555700 -0.23164800  
H 5.95444600 -2.15165500 0.86468400  
H 6.55147900 1.53267500 -1.32037000  
H 7.47296200 -0.43412300 -0.13171600  
C -3.64615500 -0.29165300 -0.52361700  
C -1.83210900 -1.43133400 0.27872700

|                                       |                                       |
|---------------------------------------|---------------------------------------|
| C -4.09065000 -1.41411900 0.19799300  | O -0.22519900 5.45039000 -0.13648400  |
| C -4.55383700 0.59614300 -1.09652800  | <sup>35</sup>                         |
| C -5.44396700 -1.69261800 0.35916200  | C 0.20414400 -0.76365100 -0.77002500  |
| C -5.91070100 0.31642300 -0.93649000  | C -0.97588000 -0.87832100 -1.52979300 |
| H -4.23103200 1.48685900 -1.63609800  | C -0.97145700 -1.20890500 -2.88322000 |
| C -6.35022100 -0.80853300 -0.22527600 | C 0.26066400 -1.34383300 -3.53095200  |
| H -5.78423100 -2.56176300 0.92669700  | C 1.45267600 -1.01792400 -2.87049800  |
| H -6.64714100 0.99805000 -1.37123900  | C 1.39292000 -0.68840700 -1.52122000  |
| H -7.42304800 -0.99187600 -0.11811300 | H -1.90497700 -1.30079300 -3.44484800 |
| N -2.26375800 -0.34633300 -0.45849300 | H 0.28676200 -1.60463200 -4.59295300  |
| N -2.95516700 -2.07294600 0.65724500  | H 2.39302700 -0.95912700 -3.42517000  |
| N 2.27952800 -0.15286900 -0.44460900  | C 3.78937900 -0.27487700 -0.75768300  |
| N 3.09871400 -1.85711700 0.61962400   | C 2.04740600 0.95492600 0.05003800    |
| C 3.22448900 -3.10493700 1.32710800   | C 4.28535000 0.64147800 0.18629400    |
| H 3.93117100 -3.76352000 0.79646900   | C 4.63080500 -1.18646600 -1.39096900  |
| H 3.58281300 -2.93793000 2.35754300   | C 5.63921200 0.69567700 0.50858600    |
| H 2.23944700 -3.58818800 1.34268400   | C 5.98554000 -1.13476200 -1.06603500  |
| C -2.99376100 -3.29145200 1.42365900  | H 4.24304600 -1.91864800 -2.10221000  |
| H -3.32983700 -3.09658300 2.45668800  | C 6.48299200 -0.20727000 -0.13713700  |
| H -3.68125200 -4.00978800 0.94739600  | H 6.02365700 1.40956100 1.24109900    |
| H -1.98304400 -3.72075400 1.43782500  | H 6.67552600 -1.83676200 -1.54320900  |
| Co 0.06118200 -1.57113500 0.52675200  | H 7.55286000 -0.19746000 0.09048800   |
| H 0.10381900 -2.93302000 1.27253100   | C -3.38207800 -0.97659900 -0.70773000 |
| C 0.83753300 -4.36626200 -2.45199600  | C -1.89250700 0.53769700 0.12736700   |
| C -0.33742100 -3.59975100 -3.06844200 | C -3.98889200 -0.28414100 0.35441200  |
| H 1.71333700 -4.42192400 -3.12058100  | C -4.05260900 -1.99035200 -1.38635100 |
| H 0.55788700 -5.39851500 -2.16809500  | C -5.29352600 -0.56251800 0.75369500  |
| H -0.02016600 -2.96643700 -3.91801900 | C -5.35914800 -2.27048400 -0.98598900 |
| H -1.14796000 -4.26090300 -3.41933200 | H -3.57233200 -2.55164300 -2.19033000 |
| B 0.14141700 -2.73687100 -1.00899100  | C -5.97155600 -1.56599500 0.06116300  |
| O 1.16585000 -3.63224300 -1.28565500  | H -5.76545000 -0.02182400 1.57760300  |
| O -0.80676600 -2.77226100 -2.01950800 | H -5.91596100 -3.06057700 -1.49813900 |
| N 0.03486700 -0.82331600 2.45340000   | H -6.99857800 -1.81270600 0.34566800  |
| C 0.08859100 -2.01787500 2.58444800   | N -2.10836900 -0.44699300 -0.81073300 |
| C 0.15125900 -3.08915600 3.60421400   | N -3.04590200 0.61163100 0.83561200   |
| H 0.14803200 -2.63855800 4.61023900   | N 2.42727000 -0.04562600 -0.80876200  |
| H -0.71169800 -3.76919300 3.50714000  | N 3.19106100 1.35972000 0.64658000    |
| H 1.06621100 -3.69164500 3.47729100   | C 3.26503900 2.39366100 1.64560800    |
| W -0.10906400 2.32670900 0.02623300   | H 3.65250800 1.98485300 2.59450600    |
| C 1.24150600 2.48158900 1.45840900    | H 3.92201100 3.21390200 1.30889400    |
| O 2.06897500 2.52707600 2.26748800    | H 2.25128700 2.78518400 1.80942900    |
| C -1.48713400 2.37691800 1.44035200   | C -3.24494500 1.41859600 2.01247800   |
| O -2.32482800 2.35876500 2.24020400   | H -4.00481200 2.19767200 1.83793200   |
| C -0.18335100 4.29372600 -0.04495200  | H -3.56320900 0.77238300 2.84819700   |



H -2.29479000 1.90031600 2.27068600  
Co 0.00817800 1.06593900 0.38550800  
H 0.21521400 0.56223900 3.78857000  
C 1.18844400 -3.48913200 0.89584100  
C -0.30764400 -3.54038400 0.54627000  
H 1.81132100 -3.99281400 0.13029000  
H 1.39047700 -3.99182500 1.86637700  
H -0.44855200 -3.63576200 -0.55256100  
H -0.83422100 -4.38717100 1.02444500  
B 0.26367000 -1.37191800 0.88880600  
O 1.49915900 -2.12902700 0.98303100  
O -0.81915600 -2.32655500 1.01367800  
N 0.16617200 -0.22444800 1.91164600  
C 0.27283100 -0.35304000 3.16590700  
C 0.50037200 -1.63523000 3.90894600  
H 1.58335600 -1.85691800 3.95504400  
H 0.12725400 -1.56270400 4.94512500  
H 0.00601400 -2.47583000 3.39782000  
B -0.75929600 3.04287400 0.11912600  
O -0.29399400 3.38059900 -1.13932800  
O -1.99612800 3.60195800 0.38145600  
C -1.31267300 4.11870500 -1.79205200  
C -2.53112700 4.00761100 -0.86339900  
H -0.97496200 5.16471800 -1.91480500  
H -1.50129500 3.69676700 -2.79357000  
H -3.07394300 4.96068000 -0.74643300  
H -3.24742100 3.24298700 -1.22078000  
H 0.01044800 2.76865300 1.07203700  
**<sup>1</sup>LCoW(CO)<sub>3</sub>**  
C 0.00011900 0.55418100 -0.80145200  
C 1.21795800 -0.08560600 -1.11639100  
C 1.25267800 -1.32091800 -1.81073600  
C 0.00005000 -1.92842400 -2.11419200  
C -1.25256600 -1.32074000 -1.81096300  
C -1.21777400 -0.08547900 -1.11655900  
H 2.17591900 -1.82077000 -2.09909900  
H 0.00002900 -2.89346800 -2.62515000  
H -2.17582800 -1.82046400 -2.09948000  
C -3.65270500 0.56468400 -0.66528500  
C -1.89028300 1.92738800 -0.10032500  
C -4.15257500 1.72933400 -0.05094000  
C -4.51591600 -0.44799100 -1.07942800  
C -5.51486500 1.92514900 0.15319200  
C -5.88187800 -0.25260200 -0.87246800

H -4.15239500 -1.36865800 -1.53617300  
C -6.37554100 0.91277400 -0.27109300  
H -5.89455800 2.83048800 0.63245700  
H -6.58140100 -1.03344200 -1.18384300  
H -7.45320000 1.02805800 -0.12463700  
C 3.65293400 0.56439900 -0.66511300  
C 1.89059900 1.92725100 -0.10024600  
C 4.15288800 1.72914200 -0.05101200  
C 4.51607300 -0.44841400 -1.07906800  
C 5.51519600 1.92492500 0.15303200  
C 5.88205400 -0.25305400 -0.87220100  
H 4.15248400 -1.36916300 -1.53559600  
C 6.37580100 0.91241900 -0.27108300  
H 5.89495400 2.83033600 0.63210900  
H 6.58152300 -1.03399900 -1.18343500  
H 7.45347300 1.02767200 -0.12468700  
N 2.27996400 0.72955500 -0.69267100  
N 3.05558700 2.51561500 0.26748500  
N -2.27973000 0.72979100 -0.69290300  
N -3.05522700 2.51571600 0.26761200  
C -3.14922200 3.78728300 0.93491800  
H -3.75760600 4.49299100 0.34353600  
H -3.60167000 3.67023600 1.93477600  
H -2.13484400 4.19703000 1.04685900  
C 3.14966700 3.78724300 0.93466300  
H 3.60220000 3.67028100 1.93449300  
H 3.75801400 4.49288200 0.34316100  
H 2.13530700 4.19702200 1.04665000  
Co 0.00014700 2.15938100 0.03605400  
W -0.00015600 -1.66655700 0.23219000  
C 1.36739100 -1.46944000 1.63772300  
O 2.19699700 -1.30534100 2.43190300  
C -1.36756100 -1.46825200 1.63767700  
O -2.19706900 -1.30340500 2.43180600  
C -0.00080000 -3.60416900 0.60252000  
O -0.00109300 -4.75079800 0.78189700  
**<sup>17</sup>W<sub>Co</sub>**  
C 0.73241200 0.19359100 -1.11566800  
C 1.75921600 -0.77289800 -1.31635800  
C 3.06867900 -0.40934400 -1.70151100  
C 3.35859200 0.97820200 -1.82586000  
C 2.36955900 1.98620200 -1.63717200  
C 1.07626200 1.57105400 -1.25556800  
H 3.85434400 -1.14074400 -1.88495400

H 4.37342400 1.28108400 -2.09053700  
H 2.63825700 3.03271200 -1.77203400  
C -0.29598100 3.69918300 -0.93775100  
C -1.20104600 1.58725100 -0.74294700  
C -1.65596700 3.81611900 -0.58757900  
C 0.49727600 4.83090900 -1.10531400  
C -2.26124800 5.05865800 -0.42071600  
C -0.10889000 6.07766500 -0.93001900  
H 1.55598500 4.76243800 -1.35655800  
C -1.46366800 6.19115100 -0.59817400  
H -3.31844200 5.14668400 -0.15960400  
H 0.49304800 6.98223400 -1.05433900  
H -1.90660400 7.18329600 -0.47193500  
C 1.75973400 -3.31214800 -1.04456900  
C -0.15106100 -2.03622200 -0.87339700  
C 0.67720100 -4.15202400 -0.71538300  
C 3.04551200 -3.82792900 -1.18149800  
C 0.84402200 -5.52169000 -0.53148800  
C 3.21350800 -5.20244000 -0.99436100  
H 3.90139200 -3.19295800 -1.41201000  
C 2.13389200 -6.03576500 -0.67910700  
H 0.00167700 -6.16790600 -0.27312400  
H 4.21459500 -5.63186200 -1.09165100  
H 2.30355100 -7.10709700 -0.53800400  
N 1.21658900 -2.04208200 -1.14303400  
N -0.44539900 -3.34763400 -0.61978000  
N -0.06056200 2.33797300 -1.03044500  
N -2.15381400 2.53013700 -0.46143800  
C -3.50046000 2.24097900 -0.05293600  
H -3.53617300 1.22740800 0.36328300  
H -3.81251100 2.94436700 0.73619200  
H -4.21303000 2.31735700 -0.89482700  
C -1.74274600 -3.84446000 -0.25379500  
H -2.45952400 -3.01795000 -0.31046000  
H -2.06304300 -4.64460600 -0.94393200  
H -1.73505900 -4.24696600 0.77489900  
Co -0.98164700 -0.31611500 -0.69522700  
H -6.14362500 -2.01085700 0.92145800  
C -0.86088200 -0.89020800 2.33248100  
C -1.73639700 -0.94502000 3.58615900  
H -0.29892300 -1.82313000 2.16154000  
H -0.15360700 -0.04900700 2.31564400  
H -1.38891600 -1.69178200 4.31695200  
H -1.80048200 0.03594800 4.08888600

B -3.04684300 -1.08722500 1.76536100  
O -1.80976200 -0.73216500 1.27239500  
O -3.03293000 -1.30400200 3.11146600  
N -4.20789400 -1.20688900 0.94790500  
C -5.50507700 -1.41993900 1.59731200  
C -6.19523900 -0.11474500 1.95281900  
H -6.39436500 0.48730100 1.04862200  
H -7.16179000 -0.30927600 2.45019300  
H -5.57422600 0.48544900 2.64139300  
B -4.16916500 -1.04858400 -0.46093000  
O -3.00326600 -0.84405800 -1.18436500  
O -5.27198500 -1.09175500 -1.26474500  
C -3.37444400 -0.57944500 -2.53815400  
C -4.82927100 -1.05290300 -2.61520300  
H -3.26524300 0.50220300 -2.72327400  
H -2.69362100 -1.11981300 -3.21216700  
H -5.46845400 -0.36889900 -3.19573100  
H -4.91514700 -2.06454000 -3.04994000  
H -5.34472000 -2.02055700 2.50643100  
W 2.61950000 0.70391800 0.42442500  
C 2.62404700 -0.77586500 1.71139700  
O 2.59004200 -1.68332100 2.44171200  
C 4.35027000 1.26320300 1.16146800  
O 5.39028300 1.60157300 1.55549800  
C 1.75109100 1.79184400 1.80428100  
O 1.17972900 2.43939900 2.58682900  
<sup>36</sup>  
C -0.59112400 1.37059300 0.08169400  
C -1.91183000 1.79335800 -0.08094500  
C -2.27186500 3.14252300 -0.06032500  
C -1.26995800 4.09827400 0.13317700  
C 0.05772500 3.72085500 0.33027700  
C 0.36671100 2.35883300 0.30761400  
H -3.30385200 3.47525100 -0.17052000  
H -1.54109200 5.15793100 0.15701500  
H 0.82673400 4.47053200 0.53536000  
C 2.78586500 2.09753500 -0.25104300  
C 1.81500200 0.64637400 1.20154900  
C 3.66500800 1.01562100 -0.04072300  
C 3.09633000 3.10642100 -1.15553300  
C 4.89079600 0.93622500 -0.69517200  
C 4.32813800 3.02508000 -1.81808700  
H 2.40370000 3.92827000 -1.34691400  
C 5.21243300 1.96816100 -1.58615700

H 5.56992500 0.09680800 -0.52838600  
H 4.60010200 3.80840000 -2.53158200  
H 6.16943900 1.93884800 -2.11531000  
C -4.16789200 0.68120800 -0.63435000  
C -2.33776500 -0.55224900 -0.10277800  
C -4.50242100 -0.68546600 -0.71103300  
C -5.12760800 1.65077900 -0.93920400  
C -5.77585100 -1.12485200 -1.06437300  
C -6.40136800 1.21292500 -1.29526000  
H -4.90794400 2.71698900 -0.91453100  
C -6.72667200 -0.15048600 -1.35411200  
H -6.01641000 -2.18952800 -1.11259100  
H -7.16623600 1.95666700 -1.53629700  
H -7.73989800 -0.45168800 -1.63484500  
N -2.83085700 0.71210600 -0.25341900  
N -3.35225000 -1.38694600 -0.38917200  
N 1.67506300 1.87017500 0.54434500  
N 3.06248300 0.16484400 0.85917700  
C 3.66782400 -1.04315000 1.34618000  
H 3.03863300 -1.46148500 2.14094500  
H 3.75732800 -1.78862600 0.53624000  
H 4.67219100 -0.82670300 1.75128900  
C -3.24567900 -2.82499600 -0.38961300  
H -2.18147400 -3.08717000 -0.31630300  
H -3.79800500 -3.26172300 0.46025000  
H -3.65033300 -3.23141300 -1.33105000  
Co -0.22446500 -0.61082000 0.12154200  
H -0.48126500 -3.47967100 1.12890600  
C 2.66875500 -1.13502700 -2.92180100  
C 2.91683600 -2.64863000 -2.99492300  
H 2.42531300 -0.69368600 -3.90385300  
H 3.54453100 -0.59400100 -2.51473400  
H 2.43233400 -3.09895300 -3.88374700  
H 3.99076500 -2.90396900 -3.02888800  
B 1.46014200 -2.19841900 -1.31922900  
O 1.57752700 -1.00413800 -2.04143400  
O 2.32923100 -3.16569600 -1.82090100  
N 0.57929800 -2.31265200 -0.24634300  
C 0.38621500 -3.56582100 0.44410400  
C 1.57837600 -4.04410700 1.26437700  
H 1.81016700 -3.31738500 2.05923700  
H 1.36260400 -5.02030400 1.73868400  
H 2.46727800 -4.16750800 0.62209800  
B 0.88488100 0.17732700 2.32656200

O 0.91854300 -1.08930200 2.90574200  
O 0.05379000 1.03560700 3.02408800  
C 0.12704500 -1.03495500 4.07998700  
C -0.69918700 0.24475500 3.91985300  
H -0.49156400 -1.94469700 4.15583100  
H 0.79037200 -0.98886500 4.96437500  
H -1.69539300 0.03556600 3.48453600  
H -0.84437600 0.78667100 4.86920600  
H 0.11994800 -4.37010000 -0.27510100  
**<sup>36</sup>K**  
C -1.75517700 1.61919900 -0.81337800  
C -2.60123900 0.80598900 -1.62301000  
C -2.76806000 1.03966100 -2.98086200  
C -2.00508000 2.04560100 -3.58960100  
C -0.99845000 2.71403700 -2.88215700  
C -0.84988000 2.45809100 -1.52436900  
H -3.42499100 0.41198800 -3.58662000  
H -2.13069100 2.24169100 -4.65793500  
H -0.30918800 3.37397600 -3.41231900  
C 1.06408100 3.92998100 -0.74257800  
C 0.48789900 2.00459000 0.36193200  
C 1.87742400 3.79528900 0.39534600  
C 1.18815600 5.03132800 -1.58788300  
C 2.87096700 4.72399800 0.69970600  
C 2.17740800 5.96446500 -1.28054100  
H 0.53435300 5.17699000 -2.44877000  
C 3.01038100 5.81024900 -0.16163900  
H 3.50792900 4.60884100 1.57968000  
H 2.30155300 6.83931000 -1.92481800  
H 3.77669200 6.56291200 0.04412100  
C -4.14597200 -1.14076300 -1.07629200  
C -2.25815500 -0.70552900 0.14660300  
C -4.03808300 -2.08918200 -0.04483600  
C -5.22199800 -1.15789800 -1.96190400  
C -4.97947800 -3.10361800 0.11651800  
C -6.16524800 -2.17097700 -1.79888600  
H -5.33590200 -0.40448400 -2.74312000  
C -6.04361900 -3.13120200 -0.78211400  
H -4.89275000 -3.83935800 0.91925100  
H -7.02270600 -2.21379800 -2.47628100  
H -6.80537300 -3.91021100 -0.68683200  
N -3.04333300 -0.31251700 -0.92133600  
N -2.89345000 -1.77715700 0.67155100  
N 0.22430200 2.82471200 -0.72202300

N 1.48207300 2.63289400 1.03802100  
C 2.03911600 2.18052200 2.28885300  
H 1.32945600 1.46440900 2.72331300  
H 3.01822500 1.69307800 2.14098500  
H 2.15500100 3.04080100 2.96742200  
C -2.43832000 -2.52605000 1.81487500  
H -1.55938400 -2.00596600 2.22208100  
H -3.22744100 -2.55424800 2.58462400  
H -2.18086100 -3.55751300 1.52346700  
Co -0.98546900 0.70269900 0.88807400  
H -2.69047200 0.40282100 3.21454800  
C 2.34785800 -1.87523000 3.15471500  
C 1.87287900 -1.67724900 4.60024500  
H 2.23271600 -2.92071800 2.81705700  
H 3.40318100 -1.58366200 3.00977000  
H 1.86318200 -2.61978600 5.17528300  
H 2.51483600 -0.95644400 5.14420300  
B 0.40698200 -0.65595400 3.19097600  
O 1.50460500 -1.03720400 2.38698200  
O 0.57119800 -1.16000600 4.48279000  
N -0.65987300 0.10613500 2.74411900  
C -1.69383200 0.45810400 3.69933700  
C -1.50887600 1.85807300 4.27215400  
H -1.45581100 2.60593900 3.46075900  
H -2.33554200 2.13520600 4.95307700  
H -0.56524900 1.91811900 4.84373300  
B -2.43730600 2.26503800 0.51979900  
O -2.09254600 3.52177700 0.97473800  
O -3.70044900 1.88979100 0.93133000  
C -3.22514200 4.07074500 1.62901200  
C -4.17266200 2.88006100 1.83115200  
H -2.91893000 4.54098500 2.57773500  
H -3.66853700 4.85007200 0.98235200  
H -4.12814200 2.48452200 2.86135600  
H -5.22239900 3.12168100 1.59681500  
H -1.72357500 -0.26229600 4.54065500  
K 1.78395700 -1.34454100 -0.26725500  
O 4.20336100 -2.83495300 -0.38802900  
O 4.33518800 -0.01843700 -0.29686400  
O 1.04858100 -1.77161900 -3.01572000  
O -0.35475100 -3.16470700 -0.87173700  
O 2.37810900 0.58276000 -2.19110400  
O 1.89542800 -4.04947400 0.63180200  
C 5.39923200 -2.13445600 -0.17251200

C 4.20927900 -4.12648300 0.15628900  
C 5.33687300 -0.80855600 -0.88014900  
C 4.20047200 1.26932900 -0.84197600  
C 0.12611500 -2.81012800 -3.22685200  
C 0.58124500 -0.47904200 -3.32087200  
C -0.92273900 -2.91103100 -2.13533800  
C -0.17100500 -4.52314600 -0.57523400  
C 3.59001000 1.28366300 -2.22701300  
C 1.76091100 0.44800500 -3.44222200  
C 2.86943900 -4.77235300 -0.07378500  
C 0.62439300 -4.64016500 0.70554000  
H 6.26274000 -2.70652600 -0.56959700  
H 4.42144800 -4.08992600 1.24448500  
H 4.99434700 -4.74829500 -0.32148300  
H 5.13708700 -0.98726100 -1.95491300  
H 6.32422100 -0.31027100 -0.79381200  
H 5.17763600 1.79281300 -0.87215400  
H 3.54402300 1.82033800 -0.15359100  
H 0.71921100 -3.73925700 -3.27894700  
H -0.38085600 -2.68666700 -4.20595300  
H -0.11201500 -0.09955600 -2.54378600  
H 0.03385800 -0.48303500 -4.28432000  
H -1.46932600 -1.95858600 -2.04739400  
H -1.66231500 -3.69189000 -2.40008200  
H -1.14931600 -5.02893600 -0.43623900  
H 0.34911300 -5.04745000 -1.40169100  
H 4.27128600 0.82533600 -2.97291100  
H 3.43618400 2.33931600 -2.53256300  
H 2.47694800 0.03090800 -4.17944600  
H 1.41423700 1.43132300 -3.81691800  
H 2.91266700 -5.82088900 0.28406500  
H 2.65428200 -4.79123000 -1.16123400  
H 0.09433200 -4.11085500 1.51388500  
H 0.70354600 -5.70934500 0.98868900  
H 5.56701200 -1.97634300 0.91279500  
**<sup>3</sup>TSIW<sub>Co</sub>**  
C -0.00003100 -0.05012300 -0.53176800  
C -1.23624600 0.45097600 -0.97886200  
C -1.31438300 1.52504500 -1.90193300  
C -0.08589200 2.11883000 -2.31013900  
C 1.18631800 1.63663900 -1.88902600  
C 1.19163900 0.56112900 -0.96480900  
H -2.25495600 1.90516300 -2.29614100  
H -0.12012300 2.96334700 -3.00168900

H 2.09542700 2.10092200 -2.26683200  
C 3.65446800 0.00411600 -0.50931100  
C 1.93111800 -1.28616000 0.26692300  
C 4.18080200 -1.10525600 0.17741200  
C 4.49309100 0.97224800 -1.05673100  
C 5.55135200 -1.29123000 0.32621100  
C 5.86727200 0.78604100 -0.90664900  
H 4.10409200 1.85336000 -1.56833100  
C 6.38919600 -0.32603500 -0.23150800  
H 5.95416700 -2.15213900 0.86475500  
H 6.55151100 1.53220200 -1.32019700  
H 7.47282600 -0.43462800 -0.13147000  
C -3.64626400 -0.29123000 -0.52344400  
C -1.83231100 -1.43115000 0.27878500  
C -4.09085900 -1.41367900 0.19812700  
C -4.55387100 0.59668600 -1.09629000  
C -5.44419900 -1.69205700 0.35931000  
C -5.91075900 0.31709500 -0.93623000  
H -4.23099100 1.48739200 -1.63583100  
C -6.35037800 -0.80785100 -0.22506200  
H -5.78453200 -2.56120500 0.92679900  
H -6.64714100 0.99881600 -1.37093200  
H -7.42322100 -0.99109400 -0.11788800  
N -2.26387200 -0.34606500 -0.45837100  
N -2.95543500 -2.07264800 0.65732000  
N 2.27943200 -0.15322600 -0.44485400  
N 3.09846900 -1.85750500 0.61944900  
C 3.22414900 -3.10531000 1.32698000  
H 3.93067300 -3.76402600 0.79629300  
H 3.58262500 -2.93829200 2.35736100  
H 2.23903900 -3.58841800 1.34269700  
C -2.99417200 -3.29123000 1.42360100  
H -3.33100300 -3.09654200 2.45641700  
H -3.68111900 -4.00975300 0.94682500  
H -1.98332900 -3.72020500 1.43841300  
Co 0.06098000 -1.57118700 0.52670200  
H 0.10350600 -2.93304300 1.27242200  
C 0.83610900 -4.36719300 -2.45150600  
C -0.33741500 -3.59919500 -3.06879300  
H 1.71229700 -4.42403500 -3.11948700  
H 0.55491900 -5.39906400 -2.16773400  
H -0.01870100 -2.96614100 -3.91802000  
H -1.14846800 -4.25931600 -3.42043800  
B 0.14095800 -2.73699900 -1.00896800

O 1.16456100 -3.63352800 -1.28497800  
O -0.80659200 -2.77128500 -2.02011800  
N 0.03505500 -0.82301800 2.45325000  
C 0.08855200 -2.01754600 2.58449600  
C 0.15108100 -3.08877800 3.60430100  
H 0.14795600 -2.63812900 4.61030400  
H -0.71198400 -3.76868200 3.50728700  
H 1.06593600 -3.69141400 3.47737900  
W -0.10873900 2.32670100 0.02620400  
C -0.18255700 4.29373400 -0.04500500  
O -0.22410300 5.45040800 -0.13656400  
C -1.48664400 2.37721000 1.44047900  
O -2.32422800 2.35923300 2.24045100  
C 1.24199300 2.48129200 1.45825700  
O 2.06955200 2.52657200 2.26725700

#### MeCN

N 1.43487300 0.00008800 -0.00008800  
C 0.27784400 -0.00018800 0.00017200  
C -1.17420400 0.00005600 -0.00003000  
H -1.55525100 0.98737900 0.31003400  
H -1.55533800 -0.22501400 -1.01011800  
H -1.55536400 -0.76218600 0.69984300

#### <sup>1</sup>LCo

C -0.00000300 0.66074800 0.00023800  
C -1.20002000 1.36810400 0.00006100  
C -1.22726700 2.76303900 -0.00011500  
C 0.00000000 3.44174000 -0.00014900  
C 1.22726400 2.76303500 0.00002300  
C 1.20001500 1.36809900 0.00018200  
H -2.15842100 3.33313300 -0.00029800  
H 0.00000100 4.53583300 -0.00030400  
H 2.15841700 3.33312900 -0.00003600  
C 3.64589000 0.57313700 0.00004000  
C 1.88180300 -0.88664100 0.00013600  
C 4.14881100 -0.74536300 -0.00007500  
C 4.51812800 1.66227600 0.00003700  
C 5.51457600 -1.01248300 -0.00018800  
C 5.88773600 1.39360300 -0.00009700  
H 4.15451300 2.69021000 0.00015400  
C 6.38083700 0.08171400 -0.00020800  
H 5.89336600 -2.03749600 -0.00025800  
H 6.59179600 2.23083300 -0.00010300  
H 7.46135100 -0.08823700 -0.00030500  
C -3.64589000 0.57313800 -0.00004200

C -1.88179000 -0.88663300 -0.00003200  
C -4.14880300 -0.74536500 -0.00005000  
C -4.51813000 1.66227400 -0.00001600  
C -5.51456600 -1.01248900 -0.00003700  
C -5.88773800 1.39359700 -0.00001400  
H -4.15451400 2.69020800 0.00002600  
C -6.38083200 0.08170600 -0.00002900  
H -5.89335300 -2.03750400 -0.00003100  
H -6.59180100 2.23082500 0.00000800  
H -7.46134600 -0.08825000 -0.00002700  
N -2.27245300 0.44451400 -0.00002000  
N -3.05024000 -1.58686700 -0.00007700  
N 2.27245100 0.44450600 0.00018100  
N 3.05025200 -1.58686900 -0.00004000  
C 3.13978400 -3.02154300 -0.00004400  
H 3.67074600 -3.38192800 -0.89850500  
H 3.67022200 -3.38199900 0.89870300  
H 2.11991400 -3.43362400 -0.00036700  
C -3.13976500 -3.02154000 -0.00002800  
H -3.67009000 -3.38197100 0.89879500  
H -3.67083600 -3.38195800 -0.89841300  
H -2.11989300 -3.43361800 -0.00046600  
Co -0.00001300 -1.15294400 0.00013200

**<sup>17</sup>K<sub>Dipp</sub>**

C 0.59238900 0.03410800 1.23796500  
C 1.05482400 1.18097000 1.90630400  
C 2.06359300 1.12016500 2.86837300  
C 2.64405700 -0.12750100 3.14760000  
C 2.23527800 -1.29267200 2.47855000  
C 1.21616000 -1.18876100 1.53195800  
H 2.40304900 2.00357800 3.41028700  
H 3.43975000 -0.19442200 3.89455300  
H 2.71253000 -2.24221300 2.71809500  
C 0.90035700 -3.54557600 0.61545400  
C -0.40282400 -1.76560500 -0.06792100  
C -0.00184100 -4.00285600 -0.35851600  
C 1.80417700 -4.42574300 1.21102500  
C -0.00812200 -5.32632700 -0.79294000  
C 1.79320200 -5.75506800 0.78627000  
H 2.49960000 -4.10020300 1.98271000  
C 0.90806000 -6.19907500 -0.20595000  
H -0.70936400 -5.66367600 -1.55924200  
H 2.49025700 -6.46467600 1.24135200  
H 0.92762700 -7.24688200 -0.51842400

C 0.65185400 3.64964000 1.48997000  
C -0.64587400 2.00184400 0.50982300  
C -0.24068200 4.26025800 0.59317200  
C 1.60281500 4.40894600 2.17172400  
C -0.20004800 5.62767800 0.33293900  
C 1.63831000 5.78274300 1.92051300  
H 2.31173400 3.95896500 2.86522800  
C 0.75538500 6.38346300 1.01442400  
H -0.89614000 6.08610700 -0.37308000  
H 2.37445900 6.39972400 2.44399100  
H 0.81082500 7.46165800 0.83907600  
N 0.36852100 2.29719200 1.42748700  
N -1.03696700 3.25468200 0.06105700  
N 0.63688700 -2.19616800 0.75455500  
N -0.77556800 -2.91247200 -0.73780700  
Co -0.88805400 0.10328500 0.15475600  
H -4.80658900 1.12632000 3.85619500  
C -3.59396900 -0.22519000 -1.39295300  
C -4.97678600 0.41730100 -1.25037900  
H -3.70772300 -1.30252900 -1.58314600  
H -4.91651400 1.48716400 -1.52338800  
B -4.07493800 0.10590000 0.81080500  
O -3.01474200 -0.08831700 -0.07704500  
O -5.24999100 0.33830800 0.14470700  
N -4.00052900 0.08546800 2.22259900  
C -5.16537600 0.56508300 2.97794000  
C -6.08141400 -0.56272300 3.42078900  
H -5.54764100 -1.27519700 4.07439100  
H -6.94054400 -0.16410000 3.98936400  
H -6.47463400 -1.11592200 2.55019600  
B -2.99506200 -0.58061500 2.99366500  
O -2.14943700 -1.54147200 2.51398100  
O -2.87157400 -0.36964300 4.34068000  
C -1.31719000 -1.97056100 3.58940300  
C -1.91953700 -1.29816100 4.84779300  
H -0.30594900 -1.57046700 3.40675100  
H -2.47145300 -2.04673900 5.44840500  
H -5.72662500 1.26672200 2.34688100  
C -2.70038100 0.38930900 -2.42846200  
H -1.69555300 -0.06166500 -2.36907000  
H -3.10097400 0.19850600 -3.43794000  
H -2.61337800 1.47455200 -2.28168000  
C -6.05954300 -0.26036300 -2.05292400  
H -7.03009800 0.23759500 -1.89024500

|                                       |                                       |
|---------------------------------------|---------------------------------------|
| H -5.82497000 -0.21302800 -3.13058800 | H -5.86032600 4.49613500 0.58646700   |
| H -6.15650300 -1.32058200 -1.76242300 | H -2.29786100 5.09538100 1.66110200   |
| C -0.89985400 -0.60128900 5.71665400  | H -3.79534000 5.89981700 1.12152700   |
| H -1.38727300 -0.11941200 6.58120900  | H -3.77973600 4.94248800 2.62882600   |
| H -0.15963800 -1.32684100 6.09769900  | C -0.26754000 -2.30467300 -3.52277000 |
| H -0.36411100 0.17123500 5.13794900   | C -0.35887100 -1.35498600 -4.71569300 |
| C -1.26684000 -3.47806300 3.65753800  | C 0.64159600 -3.48617400 -3.87580400  |
| H -0.84836800 -3.90403300 2.73060100  | H 0.20039900 -1.75176300 -2.68934900  |
| H -0.62656400 -3.79970600 4.49828500  | H -1.07306100 -0.53425200 -4.54324900 |
| H -2.27727200 -3.89636100 3.81189800  | H 0.62963800 -0.90308500 -4.91104700  |
| C -1.84401200 -3.07849200 -1.66744100 | H -0.65859700 -1.88221100 -5.63855000 |
| C -1.61531400 -2.80293600 -3.03018600 | H 0.81985000 -4.14598700 -3.01190500  |
| C -3.06694900 -3.60093000 -1.19916800 | H 0.19005700 -4.09477600 -4.67977500  |
| C -2.65715600 -3.05300800 -3.92879100 | H 1.62046700 -3.12457300 -4.23924600  |
| C -4.06513200 -3.86334000 -2.14420400 | C -0.05144400 3.52759100 -2.63638900  |
| C -3.86629000 -3.58844900 -3.49309600 | C 0.45979800 4.73197700 -3.42711700   |
| H -2.51885700 -2.83798200 -4.99127000 | C 0.21096900 2.21659600 -3.37706500   |
| H -5.02334300 -4.27360400 -1.81411500 | H 0.51858300 3.48592900 -1.69595100   |
| H -4.66406900 -3.78991000 -4.21439200 | H 0.27363400 5.67643200 -2.88704100   |
| C -1.98762200 3.54834200 -0.96040200  | H 1.54790900 4.64893800 -3.59608600   |
| C -3.33913600 3.77377900 -0.61961300  | H -0.01759600 4.81000300 -4.41987800  |
| C -1.51671100 3.68754700 -2.27960300  | H 0.00618300 1.35089400 -2.72623500   |
| C -4.22359000 4.06894200 -1.66309500  | H -0.41427400 2.13232300 -4.28404900  |
| C -2.44401700 3.98099600 -3.28529000  | H 1.26868200 2.15964500 -3.68484500   |
| C -3.78713900 4.15935900 -2.98234200  | K 3.88287800 0.09698700 0.06484800    |
| H -5.27969300 4.23644700 -1.44469800  | O 3.96664300 -2.62860300 -0.35824000  |
| H -2.10677400 4.07036800 -4.32175600  | O 3.60352200 1.72334600 -2.19659500   |
| H -4.50338300 4.38558500 -3.77798600  | O 5.67249700 -1.55417400 1.61052800   |
| C -3.32878900 -3.84497300 0.27571200  | C 3.45131800 -2.95748000 -1.62445000  |
| C -3.22119300 -5.32781400 0.63877000  | C 5.13244100 -3.31468800 0.01515100   |
| C -4.68813800 -3.30328200 0.71856200  | C 3.91362500 3.08390800 -2.04165000   |
| H -2.56573000 -3.29137100 0.84404000  | C 3.94858400 1.20934300 -3.45431300   |
| H -2.21849200 -5.73379400 0.43102900  | C 6.96921200 -1.07805000 1.36190800   |
| H -3.42484600 -5.47165500 1.71490500  | C 5.47719000 -2.93354300 1.43675100   |
| H -3.95808100 -5.92866700 0.07469100  | C 4.27885200 -2.37900100 -2.75553500  |
| H -4.85018700 -2.26424100 0.39167100  | H 2.42839700 -2.54657900 -1.65097800  |
| H -5.52463000 -3.91042100 0.32860400  | H 3.37230600 -4.05687500 -1.74272900  |
| H -4.75648900 -3.31975000 1.81952600  | H 4.97076900 -4.41128600 -0.03284000  |
| C -3.82325200 3.73816100 0.82225900   | H 5.97731900 -3.07354500 -0.66073800  |
| C -5.33717200 3.59445800 0.95150300   | C 3.46851200 3.53373000 -0.66957500   |
| C -3.38980100 4.98822100 1.59673400   | H 5.00121800 3.24713500 -2.18722300   |
| H -3.34892300 2.86517600 1.30609200   | H 3.38768100 3.69339500 -2.80399000   |
| H -5.73016200 2.71745000 0.41323800   | C 3.57440400 -0.24584200 -3.52897700  |
| H -5.60458000 3.48273900 2.01521400   | H 5.03827000 1.31655100 -3.63283600   |

H 3.41776500 1.75731200 -4.25875200  
C 7.06490000 0.33344900 1.87716400  
H 7.72011200 -1.69758000 1.89258700  
H 7.21554600 -1.10187200 0.27998400  
H 4.64150700 -3.21381900 2.09714400  
H 6.37096600 -3.50254300 1.76041700  
O 4.39383600 -0.97783700 -2.65455900  
H 5.30219400 -2.79303400 -2.73993900  
H 3.82896800 -2.67275800 -3.72242400  
O 4.12813700 2.85173300 0.36938900  
H 3.60647100 4.62786400 -0.57471700  
H 2.39463200 3.32143000 -0.54926500  
H 2.50070700 -0.36751700 -3.27643200  
H 3.71976900 -0.58754500 -4.57343300  
O 6.23978400 1.17476600 1.11426500  
H 6.75325100 0.34632500 2.94084000  
H 8.11964700 0.67270000 1.82384000  
C 5.39936100 3.35529500 0.68258400  
C 6.06688800 2.44848000 1.68075700  
H 6.03763500 3.42474200 -0.22029800  
H 5.31596200 4.37136700 1.11930300  
H 7.04575100 2.89225700 1.95329000  
H 5.45642900 2.37813400 2.60428100

#### MECP

C 0.30404813 -1.58385392 0.12096744  
C 1.55374115 -2.19290091 0.04400313  
C 1.70633083 -3.57834188 0.01802643  
C 0.54478159 -4.36131424 0.07067287  
C -0.72703538 -3.78875281 0.14314136  
C -0.82467362 -2.38975630 0.15611845  
H 2.68282027 -4.06329591 -0.03358116  
H 0.64053516 -5.45105352 0.06288802  
H -1.61066525 -4.42844750 0.20782110  
C -3.14342932 -1.83229472 -0.59930497  
C -1.98417982 -0.30702944 0.65688969  
C -3.82356508 -0.59252275 -0.64811649  
C -3.61394503 -2.92573609 -1.32311359  
C -4.99991372 -0.43527680 -1.38142036  
C -4.79832145 -2.76743066 -2.05403653  
H -3.08194481 -3.87774981 -1.32699548  
C -5.48208979 -1.54844083 -2.07834388  
H -5.52560594 0.52219651 -1.41097919  
H -5.19264799 -3.62054641 -2.61366763

H -6.41016821 -1.45861510 -2.65107704  
C 3.92485438 -1.24204200 -0.26413948  
C 2.09582901 0.09440585 0.01051782  
C 4.31932034 0.10396376 -0.38673121  
C 4.86414213 -2.26783741 -0.38371234  
C 5.63959456 0.46859745 -0.63389062  
C 6.18799619 -1.90294651 -0.62659517  
H 4.58838394 -3.31831512 -0.29041062  
C 6.57290751 -0.55968663 -0.75143034  
H 5.93163418 1.51737661 -0.72740838  
H 6.94498869 -2.68724187 -0.71809507  
H 7.62194641 -0.31394751 -0.94159390  
N 2.56213855 -1.20150315 -0.03251314  
N 3.17691732 0.87185843 -0.22024288  
N -2.02603905 -1.65111315 0.19213950  
N -3.10046962 0.31000213 0.08067847  
C -3.43327980 1.69994852 0.20921243  
H -2.54596770 2.23989792 0.56508229  
H -3.72757737 2.10077499 -0.77659105  
H -4.26317486 1.85334536 0.92278296  
C 3.16185270 2.30739935 -0.34152456  
H 2.11391143 2.62939313 -0.27829187  
H 3.74877232 2.77328359 0.46769171  
H 3.58948076 2.60424227 -1.31377565  
C 0.20922778 0.29538195 0.31968312  
H 0.65514793 2.78178246 2.40297908  
C -1.03863865 1.78216022 -2.88277584  
C -0.72040173 3.28841857 -2.91528155  
H -0.51756016 1.22152273 -3.67807728  
H -2.12446319 1.58743638 -2.98110555  
H 0.22103250 3.48608736 -3.46454623  
H -1.52129817 3.88185251 -3.39059385  
B -0.37621380 2.51426463 -0.81367395  
O -0.59092851 1.36944358 -1.61468005  
O -0.56720013 3.67103761 -1.56386280  
N -0.00089077 2.27331796 0.49102052  
C 0.33912557 3.27268152 1.46220518  
C -0.79304929 4.24576971 1.77863819  
H -1.67554827 3.71256061 2.17177034  
H -0.48016557 4.99676467 2.52842423  
H -1.10427453 4.78751882 0.86798615  
B -1.46826755 0.15999224 2.03250318  
O -2.07728412 1.11932451 2.80452075  
O -0.29518398 -0.30853912 2.59338034



C -1.28326606 1.34097553 3.95743219  
C -0.08772190 0.37708502 3.82358382  
H -0.96919261 2.39747095 3.99145192  
H -1.88930850 1.13430504 4.85696838  
H 0.88185227 0.89904544 3.78167754  
H -0.04998933 -0.36566414 4.63788588  
H 1.21980162 3.88214685 1.15443459

37

C -0.26833600 -2.00222700 -0.15341600  
C -1.54215400 -2.57671800 -0.25737600  
C -1.72427800 -3.95918600 -0.30172400  
C -0.58452600 -4.77567200 -0.27956000  
C 0.71045200 -4.23806700 -0.25748300  
C 0.84583600 -2.85011800 -0.21171300  
H -2.71395300 -4.41426000 -0.38569500  
H -0.70808600 -5.86236600 -0.31665700  
H 1.57255200 -4.90710400 -0.30657200  
C 3.34036000 -2.36837400 0.04751900  
C 1.82150200 -0.72170100 -0.48325100  
C 4.00631100 -1.12254200 0.04525600  
C 4.03221600 -3.53919300 0.35399900  
C 5.36926500 -1.02050400 0.31236800  
C 5.40056600 -3.43451000 0.63083900  
H 3.53420600 -4.50876500 0.38343500  
C 6.05968200 -2.20185000 0.60514300  
H 5.88241100 -0.05590700 0.29447300  
H 5.96367900 -4.34146100 0.87017100  
H 7.13199300 -2.15767900 0.81765800  
C -3.86100600 -1.52221500 -0.06859800  
C -1.99163300 -0.29277700 -0.60941400  
C -4.21696300 -0.15580400 -0.11758800  
C -4.81030700 -2.48893100 0.25917300  
C -5.51791000 0.27197400 0.13449600  
C -6.11775100 -2.05766100 0.51444700  
H -4.55288800 -3.54681600 0.32268400  
C -6.46863700 -0.70589800 0.44876300  
H -5.78578100 1.33077800 0.09503200  
H -6.87966000 -2.79947700 0.77158900  
H -7.50103800 -0.40511800 0.65039900  
N -2.51367000 -1.56534000 -0.36604900  
N -3.07057400 0.54348100 -0.43860400  
N 2.02593200 -2.08681100 -0.26769900  
N 3.05797500 -0.16448700 -0.25370000

C 3.35128600 1.23666400 -0.34622800  
H 2.40939900 1.79435500 -0.28493000  
H 3.99130300 1.54812900 0.49650700  
H 3.86795500 1.48802000 -1.29161700  
C -3.02563000 1.97047600 -0.57907100  
H -3.16473000 2.47474300 0.39509500  
H -2.04467700 2.24311700 -0.98714100  
H -3.81318200 2.31992700 -1.27025400  
Co -0.04838800 -0.17704200 -0.56896900  
H 0.30096900 5.55890800 -0.03366600  
C -0.50923500 0.62871600 2.44937700  
C -0.25494300 1.71448900 3.50054200  
H -1.58150800 0.39406400 2.33331400  
H 0.03337500 -0.30997900 2.63499000  
H -1.07871300 1.80932400 4.22593200  
H 0.68318400 1.54059800 4.05761100  
B 0.06755800 2.57133700 1.44791300  
O -0.03774000 1.21558900 1.23952100  
O -0.13103200 2.92047000 2.75509400  
N 0.35392300 3.51345200 0.41794300  
C 0.61434100 4.90502800 0.79571400  
C 2.07650400 5.15141900 1.12399500  
H 2.71980200 4.93461100 0.25282700  
H 2.23930600 6.20493200 1.41277200  
H 2.40423500 4.51414400 1.96449300  
B 0.45293800 3.14977500 -0.94910000  
O 0.22641500 1.87042100 -1.42887400  
O 0.77462900 4.02745000 -1.94725700  
C 0.56634600 1.86060200 -2.81366400  
C 0.63703200 3.34526900 -3.18644000  
H 1.53313800 1.34207300 -2.93351000  
H -0.20089900 1.30082400 -3.37110800  
H 1.49512400 3.57976600 -3.83668200  
H -0.28438000 3.69251100 -3.68706500  
H -0.01274100 5.15504400 1.66627000

**[K]·1THF**

K 0.32237200 0.09415800 -0.06170800  
O 0.64810400 2.73854400 -0.65109500  
O -1.89752600 1.51176900 -0.87860000  
O 1.31622400 -2.08715700 -1.45159800  
O 2.19956600 -1.35684700 1.23017400  
O -1.34014100 -1.14027000 -1.81671900  
O 2.89114000 1.17903300 0.17920600

C -0.55845400 3.45789500 -0.67439700  
C 1.63171300 3.27563600 0.19835300  
C -1.56332100 2.71878600 -1.51935900  
C -2.82804400 0.69739000 -1.55257100  
C 2.38800600 -2.71386900 -0.78047400  
C 0.23925700 -2.92621200 -1.79030800  
C 2.24227800 -2.67532100 0.73034100  
C 3.45116900 -0.74703600 1.43788500  
C -2.19028700 -0.27157300 -2.52360500  
C -0.75882400 -2.14659900 -2.60725300  
C 2.94156200 2.56568400 -0.06363100  
C 3.28700600 0.75186500 1.46016400  
H -0.39996900 4.46768700 -1.10395900  
H 1.32337300 3.17410100 1.26036400  
H 1.77504700 4.35680200 -0.00321000  
H -1.13565400 2.53631300 -2.52516200  
H -2.46338300 3.35376400 -1.64096100  
H -3.57071200 1.31477100 -2.09295800  
H -3.36404800 0.12519000 -0.77601600  
H 3.30143100 -2.17452300 -1.08382200  
H 2.49581900 -3.76458000 -1.11318900  
H -0.25434700 -3.33796400 -0.88627700  
H 0.59355500 -3.78206400 -2.39892900  
H 1.29734800 -3.15591100 1.03758100  
H 3.06902300 -3.24729700 1.19540500  
H 3.88658800 -1.08010600 2.40130500  
H 4.16168300 -1.01054100 0.63191700  
H -1.62070300 0.26796200 -3.30851000  
H -2.99623500 -0.84094600 -3.03039100  
H -0.24661600 -1.70131400 -3.48406300  
H -1.53588400 -2.84230600 -2.98346300  
H 3.73937400 3.04080400 0.53804500  
H 3.19849800 2.68852800 -1.12981200  
H 2.54590000 1.04088900 2.23433500  
H 4.25775800 1.20722000 1.73901400  
H -0.95835400 3.58469600 0.35258300  
C -2.20310300 0.54410100 2.49734500  
C -2.17177600 -1.67516700 1.75211800  
C -3.41455300 -0.16776200 3.08010300  
H -2.50030900 1.28850600 1.73403500  
H -1.58682900 1.05252200 3.25883500  
C -3.61050500 -1.30131100 2.07788200  
H -1.77869300 -2.42677700 2.46422200  
H -2.04864200 -2.06735100 0.72769100

H -3.17863900 -0.57572700 4.07878800  
H -4.29039400 0.49397600 3.17522300  
H -4.18994100 -2.14972200 2.47562000  
H -4.12250900 -0.92684900 1.17346900  
O -1.42003500 -0.47229600 1.87853200

#### [K]·2THF

K -0.10372500 0.10755500 -0.02476700  
O -0.36645500 -2.49438900 0.92275800  
O 0.93814100 -1.87861800 -1.41295000  
O -0.34812800 2.69456300 -0.86985100  
O 0.08455500 1.95357500 1.94218400  
O 1.02925000 0.66544600 -2.46878900  
O -1.65591800 -0.26347700 2.24871400  
C 0.78793200 -3.20344700 0.55318300  
C -0.61939000 -2.47451900 2.30484800  
C 0.92903300 -3.20227800 -0.95064300  
C 1.31175800 -1.69200000 -2.75474900  
C -0.40339300 3.60761200 0.20397900  
C 0.64907900 2.94196500 -1.83349600  
C 0.45566600 3.19371400 1.38666900  
C -1.01155700 1.95750300 2.81794800  
C 0.68758700 -0.42317100 -3.29000000  
C 0.56353900 1.90844600 -2.93087600  
C -1.84221700 -1.62385900 2.57056100  
C -1.23671500 0.55271400 3.31724000  
H 0.73272700 -4.25547200 0.89976300  
H 0.25953900 -2.07722100 2.85467400  
H -0.81042900 -3.50098200 2.68062500  
H 0.09118100 -3.76196300 -1.41405600  
H 1.87155800 -3.72549600 -1.20731900  
H 0.95662800 -2.53112300 -3.38401700  
H 2.41661100 -1.65038500 -2.83601700  
H -1.46346300 3.67132700 0.50505200  
H -0.09662500 4.61904200 -0.12718900  
H 1.66046400 2.92226700 -1.38160900  
H 0.49720600 3.94271600 -2.28563600  
H 1.50343600 3.07007500 1.06865700  
H 0.41871700 3.99218800 2.15530200  
H -0.81267800 2.61539700 3.68827000  
H -1.93280700 2.32240100 2.32119900  
H -0.41415500 -0.53220900 -3.32115000  
H 1.05288600 -0.26746700 -4.32590700  
H -0.48855500 1.82805800 -3.26992900

H 1.17261700 2.25112500 -3.79212800  
H -2.13938200 -1.73758900 3.62990400  
H -2.67517400 -1.99102000 1.94640800  
H -0.29838800 0.17011300 3.76614100  
H -2.01125700 0.57504200 4.10964600  
H 1.68408100 -2.74365000 1.01921100  
C 2.83493500 0.10301800 1.83365900  
C 3.57607500 0.46071200 -0.33677600  
C 4.08152700 -0.76127400 1.60809800  
H 1.96114300 -0.49942900 2.14437500  
H 2.99230800 0.87666800 2.60683000  
C 4.13998800 -0.88329700 0.08573400  
H 4.35111600 1.25320400 -0.27053900  
H 3.13597100 0.47732300 -1.34487400  
H 4.98151700 -0.24219000 1.97979300  
H 4.01897800 -1.73349100 2.12345300  
H 5.15548700 -1.06988400 -0.29925300  
H 3.47406600 -1.68835200 -0.27091900  
O 2.53354500 0.71765700 0.58791800  
O -2.30196000 -0.24432700 -1.62430000  
C -2.90665300 -1.51940800 -1.42604600  
C -3.27610700 0.76536100 -1.43106000  
C -4.26896400 -1.26240100 -0.76269100  
H -2.22974200 -2.11839400 -0.79354000  
H -3.01461700 -2.03601800 -2.39828100  
C -4.18173800 0.20761600 -0.34695700  
H -3.84124500 0.94293600 -2.37022600  
H -2.74943900 1.69548500 -1.16350400  
H -5.08589800 -1.40457400 -1.49023400  
H -4.45648200 -1.93929100 0.08629200  
H -5.16331800 0.70650500 -0.30145100  
H -3.68806200 0.30660200 0.63585200

#### 1K-BPh<sub>4</sub>

C -3.37936200 0.79984300 1.11010200  
C -3.81544300 -0.20634900 1.97938700  
C -3.54011300 -0.17192300 3.34591100  
C -2.80357300 0.91376000 3.84118000  
C -2.33891200 1.93739700 3.00305200  
C -2.62893200 1.85462000 1.64108900  
H -3.88723000 -0.94705600 4.03202700  
H -2.58556100 0.96412400 4.91180900  
H -1.77931200 2.77215100 3.42905600  
C -1.47519400 3.84087100 0.49786500

C -2.80834800 2.36999300 -0.62857300  
C -1.50655800 4.20691400 -0.86176200  
C -0.69180400 4.54974300 1.40634700  
C -0.76896100 5.28140500 -1.35024700  
C 0.04970700 5.62611400 0.91734200  
H -0.64130400 4.27639500 2.46077700  
C 0.01218700 5.98945500 -0.43619600  
H -0.79617100 5.55656400 -2.40746500  
H 0.67757000 6.19591900 1.60814900  
H 0.60784700 6.83884100 -0.78237000  
C -5.17213000 -2.34228500 1.54245000  
C -4.74621100 -0.79225200 -0.07930600  
C -5.79773000 -2.75277600 0.34766800  
C -5.24004300 -3.13259000 2.68870300  
C -6.50357400 -3.94930300 0.26366000  
C -5.94660000 -4.33340000 2.60388200  
H -4.75787100 -2.83568600 3.62072500  
C -6.56974000 -4.73581100 1.41458400  
H -6.98425200 -4.26261500 -0.66638300  
H -6.01478700 -4.97301900 3.48848900  
H -7.11711500 -5.68231700 1.38710600  
N -4.55454400 -1.14397300 1.24079000  
N -5.52129700 -1.78024000 -0.60187200  
N -2.28159200 2.72428800 0.59684900  
N -2.33111000 3.29431200 -1.50245400  
C -2.68151100 3.36132300 -2.89536700  
H -3.04331000 4.37258900 -3.14706300  
H -1.81437100 3.12297000 -3.53787400  
H -3.48688300 2.63859200 -3.08278700  
C -6.05877700 -1.78556200 -1.93647500  
H -5.55088700 -2.53280000 -2.57307500  
H -7.13601800 -2.01877000 -1.90301600  
H -5.92893400 -0.78364600 -2.36718200  
Co -3.94635000 0.83726100 -0.66286900  
C -6.28252500 3.53624400 1.44232400  
C -6.82474000 2.17064500 1.88058900  
H -5.81755200 4.09489500 2.27304600  
H -7.07277200 4.17332400 0.99946200  
H -6.33671300 1.82109100 2.81077200  
H -7.91666600 2.17007300 2.04217700  
B -5.44247900 1.89138200 0.10857000  
O -5.31597500 3.23452600 0.45925600  
O -6.48988800 1.30291700 0.81927800  
N -3.44443200 0.13323300 -2.37215700

C -3.25635700 -0.41007600 -3.37763900  
C -3.09771000 -1.14764400 -4.61221900  
H -2.27259500 -0.73328700 -5.21331700  
H -2.87135300 -2.19851700 -4.36851800  
H -4.02727800 -1.10102700 -5.20582200  
K -0.88060000 -0.53452800 -0.71206000  
O -0.26315700 -1.29450800 -3.28263900  
O -1.84539200 -3.03834200 -2.04700200  
O 0.72646100 -1.13158400 1.45759900  
O 0.55623100 1.53330000 0.38007600  
O -1.46411200 -2.75991100 0.76366400  
O 1.48170400 0.48771400 -2.05828500  
C -0.06327300 -2.65463700 -3.56634400  
C 0.45600600 -0.36785900 -4.06326000  
C -0.55805500 -3.47383300 -2.39427100  
C -2.52883600 -3.81736100 -1.09727900  
C 1.59195900 -0.08946000 1.84484200  
C -0.24208600 -1.51204300 2.39699300  
C 0.95462300 1.27867100 1.70899800  
C 1.53037300 2.17368100 -0.41112900  
C -1.81347500 -4.00347200 0.22458600  
C -0.79898700 -2.85545200 2.00065900  
C 1.73660600 0.04316300 -3.36199900  
C 1.28268700 1.86563700 -1.86361200  
H 1.00697600 -2.88876600 -3.72486300  
H -0.20168300 0.51004700 -4.19775300  
H 0.67925900 -0.77578800 -5.06826900  
H 0.13592400 -3.35726700 -1.53969900  
H -0.55622700 -4.54544900 -2.68291200  
H -2.75555600 -4.82436900 -1.50628700  
H -3.48182700 -3.29396000 -0.92575500  
H 2.47398500 -0.17124000 1.19030500  
H 1.93158500 -0.23906800 2.88947500  
H -1.06216900 -0.77003000 2.47090700  
H 0.20907800 -1.61237800 3.40520100  
H 0.04533300 1.34273300 2.32871600  
H 1.65910600 2.05399400 2.06542200  
H 1.49020300 3.26897600 -0.25288200  
H 2.54541000 1.82577200 -0.15105200  
H -0.90696100 -4.63213100 0.10393000  
H -2.49978300 -4.55445400 0.90091400  
H 0.03403600 -3.58250800 1.92550700  
H -1.49975100 -3.20620100 2.78560700  
H 2.26473500 0.81537900 -3.95529000  
H 2.41369600 -0.82370100 -3.27387200  
H 0.25237600 2.16827300 -2.14944900  
H 1.99487000 2.45418300 -2.47202200  
H -0.61000600 -2.93207800 -4.49095000  
H -5.32226100 1.56788700 -1.19554600  
B 6.06017600 -0.42674700 0.39279400  
C 6.47624700 -0.46156000 1.98282600  
C 7.79664100 -0.44187500 2.45922500  
C 5.47096500 -0.50119300 2.96963300  
C 8.10115900 -0.44960400 3.82394900  
H 8.62240600 -0.42688400 1.73968900  
C 5.75478400 -0.50436100 4.33500700  
H 4.42336200 -0.54013500 2.64886600  
C 7.08076800 -0.47711300 4.77307700  
H 9.14841200 -0.43784100 4.14711800  
H 4.93738100 -0.53466800 5.06508600  
H 7.31441000 -0.48429800 5.84320900  
C 7.37445800 -0.69606900 -0.56008800  
C 7.62156700 -1.89658700 -1.24529700  
C 8.34643400 0.31186900 -0.72066200  
C 8.76215300 -2.09116200 -2.03038200  
H 6.89530500 -2.71327600 -1.16925100  
C 9.49250500 0.13378500 -1.49513300  
H 8.19397400 1.27591600 -0.22149400  
C 9.70863800 -1.07603200 -2.15885600  
H 8.91003900 -3.04601200 -2.54817300  
H 10.22197200 0.94674900 -1.58631100  
H 10.60427600 -1.22241000 -2.77228500  
C 4.93512500 -1.59861500 0.14737000  
C 3.76167700 -1.42038200 -0.60050800  
C 5.11701900 -2.88349400 0.69889300  
C 2.82778800 -2.44276800 -0.78601800  
H 3.54115600 -0.44141600 -1.03561300  
C 4.20292200 -3.92032500 0.50982600  
H 6.00829400 -3.07367300 1.30769100  
C 3.04269100 -3.70518200 -0.23832500  
H 1.91425400 -2.23102600 -1.35019300  
H 4.39277500 -4.90270700 0.95719900  
H 2.31303100 -4.51113700 -0.37896400  
C 5.47609800 1.06326200 -0.00609300  
C 5.27810300 1.40556000 -1.36001000  
C 5.20780000 2.08420700 0.92248100  
C 4.84921300 2.67074100 -1.76214800  
H 5.49908400 0.65693000 -2.12962700

C 4.78199800 3.36011800 0.53725800  
H 5.36157700 1.88451900 1.98861300  
C 4.59978900 3.66363800 -0.81077900  
H 4.72806200 2.89215600 -2.82927900  
H 4.60050100 4.12637700 1.29975800  
H 4.27434100 4.66326500 -1.11869300

**TS1K-BPh<sub>4</sub>**

C -3.16576800 0.26262600 -1.27308800  
C -2.49086500 1.32326500 -1.87353000  
C -1.86928400 1.18288000 -3.11436700  
C -1.96244200 -0.05762400 -3.75732500  
C -2.64932900 -1.13998800 -3.19173400  
C -3.23790700 -0.95761300 -1.93987200  
H -1.33262000 2.00074400 -3.59638100  
H -1.48993900 -0.18292200 -4.73568100  
H -2.72251700 -2.07906200 -3.74256400  
C -4.23600300 -3.21644800 -1.25483800  
C -4.54949800 -1.31769100 -0.03440200  
C -5.00590500 -3.52964000 -0.11889200  
C -3.85745200 -4.21145800 -2.15487100  
C -5.42082500 -4.83077100 0.15025800  
C -4.27081700 -5.51559000 -1.88441300  
H -3.25471300 -3.99411600 -3.03666700  
C -5.04088200 -5.82260300 -0.75334400  
H -6.01193100 -5.07065300 1.03723600  
H -3.98564000 -6.31633500 -2.57259000  
H -5.34642400 -6.85730800 -0.57446900  
C -2.10984700 3.75026100 -1.13657900  
C -3.38535200 2.29063700 0.06777500  
C -2.61558500 4.41354800 -0.00316000  
C -1.25616000 4.40269300 -2.02561300  
C -2.28650600 5.73633000 0.27819200  
C -0.92976500 5.72871200 -1.74521500  
H -0.83597200 3.90051000 -2.89687200  
C -1.43448700 6.38601400 -0.61378200  
H -2.66907600 6.24359600 1.16697200  
H -0.25740400 6.26421900 -2.42132300  
H -1.15063700 7.42496100 -0.42400400  
N -2.59548200 2.45801600 -1.04922700  
N -3.39381100 3.49221600 0.68409100  
N -3.98892300 -1.85969100 -1.16660800  
N -5.18182700 -2.34285800 0.58158600  
C -5.96812400 -2.22778300 1.78165400

H -6.81591500 -2.92915400 1.73279000  
H -5.36893300 -2.44985300 2.68186300  
H -6.36538100 -1.20607000 1.84324900  
C -4.12816800 3.80041400 1.88175400  
H -3.49352800 3.69555300 2.77904000  
H -4.50668300 4.83312400 1.82606500  
H -4.98594600 3.11861200 1.94810000  
Co -4.12618800 0.52785000 0.31085700  
H -5.29323600 0.89233900 1.24268300  
C -7.30413700 0.87416000 -2.33019400  
C -6.64489200 2.25103700 -2.47597200  
H -7.39986000 0.34126600 -3.29124100  
H -8.30884600 0.93793200 -1.87183800  
H -6.10702500 2.35319200 -3.43661600  
H -7.36296100 3.08450600 -2.39400200  
B -5.52483300 1.03298800 -0.91030000  
O -6.44058200 0.15629300 -1.46671400  
O -5.71062400 2.31048600 -1.41317900  
N -3.05883300 0.06419600 2.03787900  
C -4.15523000 0.45056700 2.36575200  
C -4.94345500 0.69410900 3.59854800  
H -4.38126900 0.34044500 4.47911400  
H -5.15070700 1.77034800 3.71780300  
H -5.91704300 0.17964900 3.55516600  
K -0.55655800 -0.30237300 0.91876700  
O -0.14416600 0.05869800 3.64713900  
O -0.09007100 2.30357800 1.84621300  
O 1.24700000 -1.55803900 -0.72769400  
O -1.24279100 -2.83506300 -0.07468900  
O 1.11277500 1.26795300 -0.54586500  
O -0.42427800 -2.60053200 2.63669100  
C -0.44883700 1.37603300 4.01224000  
C -0.83901000 -0.92019900 4.36859600  
C 0.35841500 2.33559000 3.17595300  
C 0.68541100 3.06635500 0.94706400  
C 0.99875900 -2.91275800 -0.99164400  
C 1.40129800 -0.72025800 -1.85049700  
C -0.47687400 -3.19583500 -1.20261900  
C -1.41179100 -3.84362400 0.88767900  
C 1.74072100 2.26064000 0.22710700  
C 2.00019700 0.58782400 -1.40464700  
C -0.28793100 -2.27967900 3.99641600  
C -1.62084900 -3.22393900 2.24703900  
H -0.20166000 1.54670200 5.08116300

|   |             |             |             |   |             |             |             |
|---|-------------|-------------|-------------|---|-------------|-------------|-------------|
| H | -1.92443400 | -0.85506300 | 4.15274800  | H | 10.06460600 | -2.73193500 | -1.23646800 |
| H | -0.69491000 | -0.77642500 | 5.46092400  | H | 10.57549900 | -3.25345000 | 1.15596600  |
| H | 1.42968900  | 2.06594100  | 3.24216200  | C | 5.00871300  | -0.14408200 | 1.01423700  |
| H | 0.23404700  | 3.35547100  | 3.59670600  | C | 3.86836400  | -0.95578600 | 1.12851700  |
| H | 1.16812400  | 3.91365700  | 1.46991600  | C | 5.22514500  | 0.75352800  | 2.07956100  |
| H | -0.01001000 | 3.48283300  | 0.20236000  | C | 2.99763600  | -0.88648300 | 2.21900200  |
| H | 1.37084300  | -3.47234800 | -0.11602400 | H | 3.62351100  | -1.65307400 | 0.32349000  |
| H | 1.57604300  | -3.25343400 | -1.87389600 | C | 4.37700500  | 0.82659900  | 3.18607400  |
| H | 0.42789100  | -0.54311000 | -2.35303400 | H | 6.09439100  | 1.41967500  | 2.03821000  |
| H | 2.09615900  | -1.18020100 | -2.57880600 | C | 3.25151700  | 0.00222900  | 3.26321800  |
| H | -0.85878200 | -2.59447600 | -2.04369700 | H | 2.11302600  | -1.53253700 | 2.24648000  |
| H | -0.62801600 | -4.26269900 | -1.45940200 | H | 4.59503700  | 1.53491300  | 3.99395800  |
| H | -2.28675500 | -4.47488300 | 0.63044700  | H | 2.57140200  | 0.05550900  | 4.11870600  |
| H | -0.51864500 | -4.49491900 | 0.94038400  | C | 5.40663400  | -0.93494300 | -1.55993500 |
| H | 2.45920600  | 1.80033900  | 0.93526100  | C | 5.12581000  | -2.31698500 | -1.56080600 |
| H | 2.31052900  | 2.95656600  | -0.42308600 | C | 5.11589500  | -0.25753900 | -2.75677700 |
| H | 2.95453800  | 0.38687000  | -0.88851000 | C | 4.57989800  | -2.97481700 | -2.66343200 |
| H | 2.21801900  | 1.20619400  | -2.29915700 | H | 5.37014300  | -2.90455600 | -0.66855000 |
| H | -0.76908400 | -3.05158800 | 4.63012300  | C | 4.57796400  | -0.90133400 | -3.87612900 |
| H | 0.79417500  | -2.29313600 | 4.21011800  | H | 5.33386900  | 0.81379000  | -2.82556200 |
| H | -2.46018300 | -2.49969700 | 2.20919300  | C | 4.30119500  | -2.26740200 | -3.83599200 |
| H | -1.88996900 | -4.02869200 | 2.96184700  | H | 4.38813700  | -4.05307700 | -2.61537400 |
| H | -1.53061400 | 1.57756000  | 3.87175300  | H | 4.38365000  | -0.32962100 | -4.79105500 |
| B | 6.08176000  | -0.22651700 | -0.23352900 | H | 3.88793700  | -2.77970100 | -4.71170400 |
| C | 6.56518200  | 1.30296200  | -0.59657700 |   |             |             |             |
| C | 7.90242300  | 1.68795000  | -0.78259200 |   |             |             |             |
| C | 5.60907100  | 2.32551800  | -0.75587200 |   |             |             |             |
| C | 8.26703200  | 2.99662400  | -1.11392300 |   |             |             |             |
| H | 8.69268400  | 0.93983900  | -0.65742200 |   |             |             |             |
| C | 5.95184300  | 3.63507100  | -1.09024700 |   |             |             |             |
| H | 4.55195000  | 2.08228100  | -0.60202600 |   |             |             |             |
| C | 7.29266600  | 3.98075000  | -1.27334600 |   |             |             |             |
| H | 9.32550500  | 3.24912600  | -1.24480900 |   |             |             |             |
| H | 5.16939900  | 4.39484500  | -1.20458000 |   |             |             |             |
| H | 7.57361900  | 5.00743600  | -1.53192500 |   |             |             |             |
| C | 7.37447300  | -1.14218500 | 0.21054300  |   |             |             |             |
| C | 7.69258700  | -1.45857600 | 1.54124900  |   |             |             |             |
| C | 8.26473100  | -1.63202100 | -0.76560900 |   |             |             |             |
| C | 8.82352800  | -2.20524000 | 1.88447600  |   |             |             |             |
| H | 7.03086600  | -1.11305700 | 2.34320200  |   |             |             |             |
| C | 9.39996200  | -2.37477400 | -0.44141800 |   |             |             |             |
| H | 8.05599100  | -1.42492500 | -1.82171900 |   |             |             |             |
| C | 9.68811600  | -2.66730900 | 0.89340700  |   |             |             |             |
| H | 9.02855600  | -2.42956800 | 2.93769200  |   |             |             |             |
